# Supplementary material
Source: PubMed Central journal article supplement (PMC4655166)
Supplement: NIHMS724865-supplement-13361_2015_1256_MOESM1_ESM.pdf [file NIHMS724865-supplement-13361_2015_1256_MOESM1_ESM.pdf]

# **Peptidomics and Secretomics of the Mammalian Peripheral Sensory-Motor System**

Emily G. Tillmaand,<sup>§</sup> Ning Yang,<sup>§</sup> Callie A.C. Kindt,<sup>§</sup> Elena V. Romanova, Stanislav S. Rubakhin, and  
Jonathan V. Sweedler<sup>\*</sup>

Department of Chemistry and the Beckman Institute for Advanced Science and Technology  
University of Illinois at Urbana-Champaign, Urbana, IL 61801, USA

<sup>§</sup> These authors contributed equally to the project.

\*Correspondence:

Professor Jonathan V. Sweedler, Department of Chemistry, University of Illinois at Urbana-Champaign,  
Urbana, Illinois, USA  
E-mail: jsweedle@illinois.edu, phone: 217-244-4359, fax: 217-265-6290

## **Supplementary Material**

### **Contents:**

Description of calibration approaches for regional DRG release via MALDI MS.

Figures S1–S3

Tables S1–S6

### *Calibration of regional release*

When collecting release from semi-intact preparations (see Figure S1), the amount of material collected usually precludes LC-MS measurement and MALDI MS-based MS/MS measurements. An issue is that even with SPE sample collection, the direct MALDI MS produced numerous low intensity peaks; accurately assigning these peaks can be problematic. Thus, we acquired MALDI MS (with limited LC-FT MS information on release), and LC-FT MS characterization of the contents of the system. We performed a three-stage calibration approach for the compounds detected using SPE and MALDI MS. We then compared the different datasets using the higher accuracy (but with poorer detection limit) datasets to identify and even to calibrate the direct MALDI MS spectra. We internally calibrated the spectra using several ubiquitously observed compounds, including well-recognized and consistently observed DHB matrix ions in the low molecular mass region and thymosin beta 4 ions in the higher mass region. Peptides from neurofilament 3, medium (2328.158 Da Acetyl-SYTLDSLGNPSAYRRVTETR, and 3094.667 Da VEAPKLVQHKFVEEIIIEETKVEDEK) and vimentin (2335.160 Da) proteins were chosen as additional standards. Most spectra were recalibrated in more defined mass windows.

As a result of the MALDI MS dataset evaluations, 198 different  $m/z$  entries were selected as putative peptides present in releasate from all studied regions. The selective nature of choosing mass spectra for high quality calibration restricted the number of compounds assigned; in all cases, we had between 50 and 116 peaks of acceptable quality in each spectrum. The identities of 160 peptides were assigned in our MALDI MS dataset by matching the  $m/z$ s with corresponding information in the FT MS identification results (Table S4). Perhaps not surprisingly, there are several instances where more than one identification assignment can be made for a detected  $m/z$ . For such cases, whenever possible, we assigned isobaric peptides to those from proteins that already have been confirmed. For example, 68 matches to neurofilament protein-related peptides represent a large group of related peptides. However, peptides related to medium neurofilament 3 (P12839) and uncharacterized peptide G3V7S2 indicate two possible assignments to the same molecules. A BLAST search demonstrates a 95% homology between P12839 and G3V7S2 (<http://www.uniprot.org/blast/uniprot/B201505242FZDO96J1N>). Nine peptide pairs with the same  $m/z$ s were found that originated from either G3V7S2 or P12839, suggesting an inability to distinguish the protein source for these peptides.

The detection of multiple peptides originating from the same protein family increases the confidence in their assignment. In our dataset, there are several peaks that have tentative assignments that match others from the same protein family (similar to peptide mass fingerprinting). For example, myelin-related proteins such as myelin basic protein and myelin protein P0 are likely the source of 39 peptides. Additional putative peptides entries include: vimentin (13), tubulin-related proteins (4), thymosin beta 4 and 10 (7), hemoglobin-related (6), caveolin 1 (2), and gamma-synuclein (2). There are many other peptides observed via MALDI MS that match the FT MS data by  $m/z$ , and additional peaks that have no match (Table S4).

As a last point, many of our assignments are for peptides that are expected or previously reported to be in these tissues. For example, isolated semi-intact preparations of DRGs were used in the experiments. When isolating our samples, nerves had to be cut, creating a nerve injury model. Therefore, the release of neurofilament protein-related peptides is expected since neurofilament proteins are markers of neurite outgrowth. Interestingly, although G3V7S2 is listed as an uncharacterized protein in the UniProt database, the expression of G3V7S2 is high in the brain (the Expression Atlas, <http://www.ebi.ac.uk/gxa/genes/ENSRNOG00000013916>). In addition, a 1.6 log<sub>2</sub>-fold increase in the G3V7S2 RNA level was reported in DRGs two weeks after L5 spinal nerve ligation (the Expression Atlas, <http://www.ebi.ac.uk/gxa/genes/ENSRNOG00000013916>). However, the opposite effect was observed for the RNA levels in the case of the intraorbital nerve damage. Unfortunately, there is no information on the expression of neurofilament 3, medium (P12839) in the database. Only peptides associated with the light (68–70 kDa) and the medium (145–160 kDa), but not the heavy (200–220 kDa), neurofilament proteins were observed, indicating differences in their localization and/or processing. Another protein frequently observed in our dataset is vimentin, an intermediate filament protein expressed

by neurons and glia, including Schwann cells [1, 2]. Vimentin is involved in axonogenesis and peripheral nerve injury response, induced in Schwann cells after nerve injury, and its phosphorylation controls axon outgrowth [1, 3]. Vimentin RNA levels decrease in DRGs 2 weeks after L5 spinal nerve ligation (the Expression Atlas, <http://www.ebi.ac.uk/gxa/genes/ENSRNOG00000013916>).

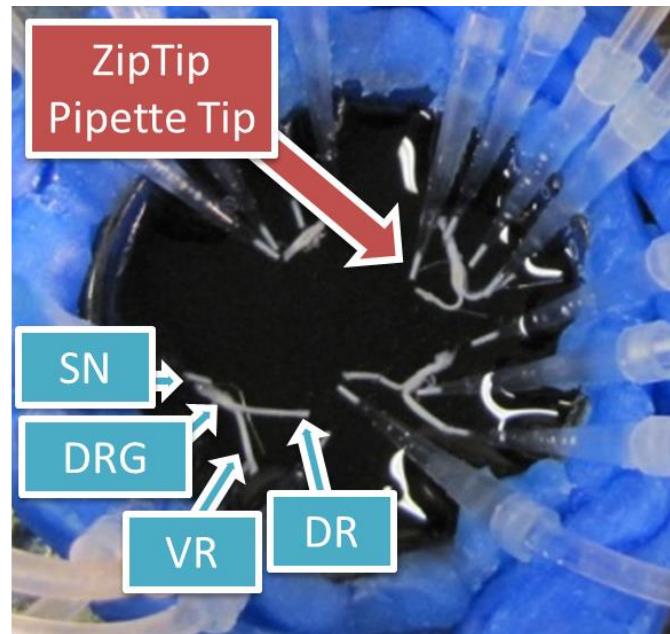

**Figure S1.** Experimental schematic for investigation of regional release from mammalian peripheral sensory-motor structures, including the L4 dorsal root ganglion (DRG), ventral root (VR), dorsal root (DR), and spinal nerve (SN). A cured Sylgard-filled glass Petri dish with dentist's wax affixed on the walls was used as the experimental chamber. DRGs and attached nerves were pinned down to the Sylgard surface and C18 ZipTip pipette tips (Millipore) mounted in close proximity to the investigated anatomical region. Four different experiments were performed (4 animals and 8 L4 ganglia) at 36 °C.

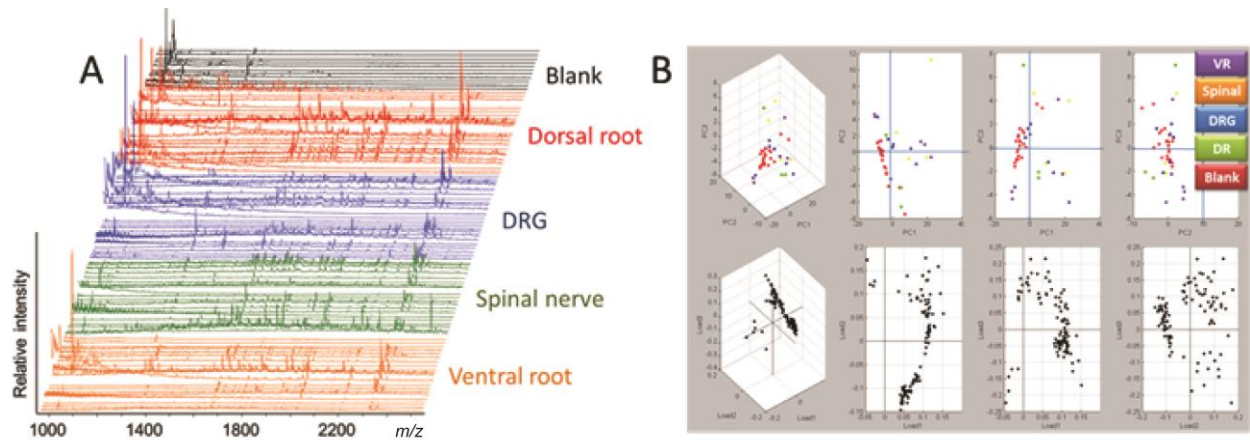

**Figure S2.** Metabolite and peptide profiles are similar for releasates from the studies regions of the mammalian peripheral sensory-motor system. **A.** Representative mass spectra of peptide profiles of releasates collected four experiments. **B.** Principal component analysis of the data set.

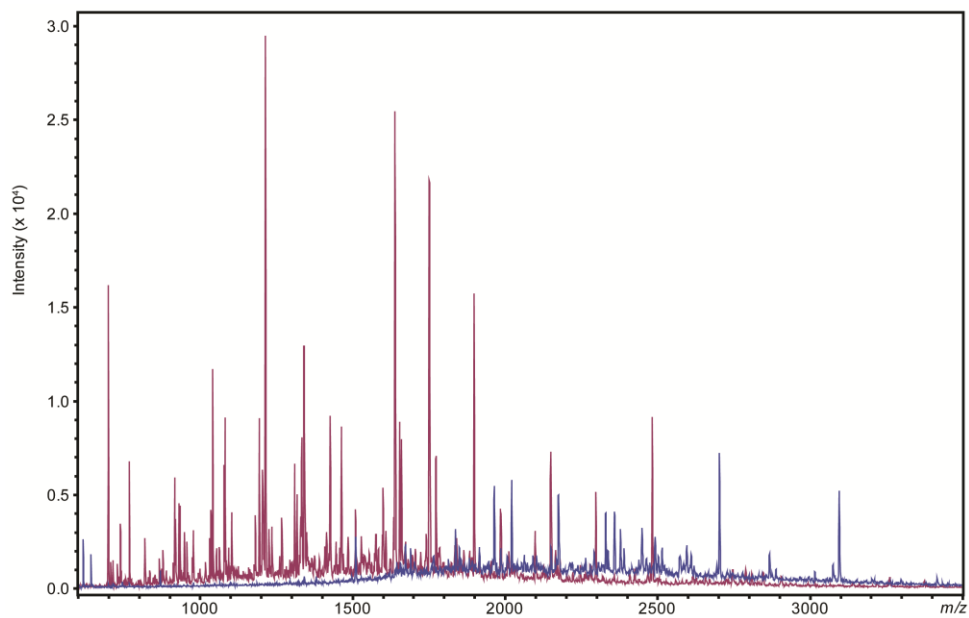

**Figure S3.** Mass spectra comparing peaks from stimulation collections from cluster (maroon) and culture (blue). Although a number of signals in the peptide range were observed for both samples, few peaks overlap.

**Table S1.** Peptides identified from tissue extracts from the LC-FTMS measurements assigned using PEAKS software.

| Precursor                               | Accession number     | Peptide sequence                                                                                         | Score (-10logP) | Mass (Da) | Mass error (ppm) |
|-----------------------------------------|----------------------|----------------------------------------------------------------------------------------------------------|-----------------|-----------|------------------|
| 10 kDa heat shock protein mitochondrial | sp P26772 CH10_RAT   | F.LFRDGDILGKYVD                                                                                          | 30.94           | 1509.78   | -5               |
| 10 kDa heat shock protein mitochondrial | sp P26772 CH10_RAT   | F.RDGDILGKYVD                                                                                            | 30.75           | 1249.63   | -1               |
| 10 kDa heat shock protein mitochondrial | sp P26772 CH10_RAT   | M.A(+42.01)GQAFRKFL.P                                                                                    | 44.81           | 1078.59   | -0.4             |
| 10 kDa heat shock protein mitochondrial | sp P26772 CH10_RAT   | M.A(+42.01)GQAFRKFLPL.F                                                                                  | 41.07           | 1288.73   | 0.7              |
| 10 kDa heat shock protein mitochondrial | sp P26772 CH10_RAT   | M.A(+42.01)GQAFRKFLPLFDR.V                                                                               | 49.45           | 1706.93   | -2.6             |
| 10 kDa heat shock protein mitochondrial | sp P26772 CH10_RAT   | M.A(+42.01)GQAFRKFLPLFDR.V.L                                                                             | 51.12           | 1805.99   | -2.8             |
| 10 kDa heat shock protein mitochondrial | sp P26772 CH10_RAT   | M.A(+42.01)GQAFRKFLPLFDR.VL.V.E                                                                          | 38.81           | 2018.15   | 0.6              |
| 10 kDa heat shock protein mitochondrial | sp P26772 CH10_RAT   | M.A(+42.01)GQAFRKFLPLFDR.VL.V.E.R                                                                        | 43.39           | 2147.19   | 0.4              |
| 10 kDa heat shock protein mitochondrial | sp P26772 CH10_RAT   | M.A(+42.01)GQAFRKFLPLFDR.VL.V.E.R.S                                                                      | 51.94           | 2303.29   | 0.1              |
| 10 kDa heat shock protein mitochondrial | sp P26772 CH10_RAT   | M.A(+42.01)GQAFRKFLPLFDR.VL.V.E.R.S.A                                                                    | 56.6            | 2390.32   | -2.2             |
| 10 kDa heat shock protein mitochondrial | sp P26772 CH10_RAT   | M.A(+42.01)GQAFRKFLPLFDR.VL.V.E.R.S.A.A                                                                  | 27.12           | 2461.36   | -1               |
| 10 kDa heat shock protein mitochondrial | sp P26772 CH10_RAT   | M.A(+42.01)GQAFRKFLPLFDR.VL.V.E.R.S.A.A.E                                                                | 36.39           | 2532.4    | -1.1             |
| 10 kDa heat shock protein mitochondrial | sp P26772 CH10_RAT   | M.A(+42.01)GQAFRKFLPLFDR.VL.V.E.R.S.A.A.E.T.V                                                            | 34.09           | 2762.49   | -2.8             |
| 10 kDa heat shock protein mitochondrial | sp P26772 CH10_RAT   | M.A(+42.01)GQAFRKFLPLFDR.VL.V.E.R.S.A.A.E.T.V.T                                                          | 26.28           | 2861.56   | -0.1             |
| 10 kDa heat shock protein mitochondrial | sp P26772 CH10_RAT   | M.A(+42.01)GQAFRKFLPLFDR.VL.V.E.R.S.A.A.E.T.V.T.K.G.G.I.M.L.P.E.K.S.Q.G.K.V.L.Q.A.T                      | 19.81           | 4727.59   | -1.9             |
| 10 kDa heat shock protein mitochondrial | sp P26772 CH10_RAT   | M.A.G.Q.A.F.R.K.(+42.01).F.L.P.L.F.D.R.V.L.V.E.R.S.A.A.E.T.V.T.K.G.G.I.M.L.P.E.K.S.Q.G.K.V.L.Q.A.(-98).T | 19.49           | 4726.61   | -6.7             |
| 40S ribosomal protein S12               | tr Q6PDW1 Q6PDW1_RAT | M.A(+42.01)EEGIAAGGVMDVN.TALQEVLKTALIHDLG.LAR.G                                                          | 21.79           | 3303.71   | -0.1             |
| 40S ribosomal protein S12               | tr Q6PDW1 Q6PDW1_RAT | M.A(+42.01)EEGIAAGGVMDVN.TALQEVLKTALIHDLG.LARGIRE.A                                                      | 27.29           | 3758.96   | 0.1              |
| 40S ribosomal protein S12               | tr Q6PDW1 Q6PDW1_RAT | M.A(+42.01)EEGIAAGGVMDVN.TALQEVLKTALIHDLG.LARGIRE.A.A                                                    | 35.06           | 3830      | -2.5             |
| 40S ribosomal protein S12               | tr Q6PDW1 Q6PDW1_RAT | M.A(+42.01)EEGIAAGGVMDVN.TALQEVLKT.A                                                                     | 41.56           | 2357.18   | -0.6             |
| 40S ribosomal protein S12               | tr Q6PDW1 Q6PDW1_RAT | M.A(+42.01)EEGIAAGGVMDVN.TALQEVLKTALIHDLG.L.A                                                            | 38.92           | 3076.58   | 0.3              |
| 40S ribosomal protein S19               | sp P17074 RS19_RAT   | L.AKHKELAPYDEN.W                                                                                         | 20.56           | 1413.69   | -0.2             |
| 40S ribosomal protein S21               | sp P05765 RS21_RAT   | A.IRRMGESDDSI.L.R.L.A.K.A.D.G.I.V.S.K.N.F                                                                | 44.41           | 2790.48   | 0.4              |
| 40S ribosomal protein S21               | sp P05765 RS21_RAT   | A.K.A.D.G.I.V.S.K.N.F                                                                                    | 43.13           | 1077.58   | 0                |

|                           |                      |                                                              |       |         |      |
|---------------------------|----------------------|--------------------------------------------------------------|-------|---------|------|
| 40S ribosomal protein S21 | sp P05765 RS21_RAT   | G.AIRRMGESDDSilRLAKADGIVSKNF                                 | 18.85 | 2861.52 | -2.5 |
| 40S ribosomal protein S21 | sp P05765 RS21_RAT   | L.AKADGIVSKNF                                                | 48.89 | 1148.62 | -0.8 |
| 40S ribosomal protein S21 | sp P05765 RS21_RAT   | M(+42.01)QNDAGEFVDLYVPRKC(-.98)(-1.01).S                     | 18.95 | 2023.94 | -7.7 |
| 40S ribosomal protein S21 | sp P05765 RS21_RAT   | M(+42.01)QNDAGEFVDLYVPRKC.S                                  | 44.17 | 2025.93 | 0.8  |
| 40S ribosomal protein S21 | sp P05765 RS21_RAT   | M.GESDDSilRLAKADGIVSKNF                                      | 24.87 | 2234.15 | 0.6  |
| 40S ribosomal protein S21 | sp P05765 RS21_RAT   | R.MGESDDSilRLAKADGIVSKNF                                     | 44.35 | 2365.19 | -2.1 |
| 40S ribosomal protein S21 | sp P05765 RS21_RAT   | R.RMGESDDSilRLAKADGIVSKNF                                    | 45.11 | 2521.3  | -2.2 |
| 40S ribosomal protein S21 | sp P05765 RS21_RAT   | K.ADGIVSKNF                                                  | 19.47 | 949.487 | -2   |
| 40S ribosomal protein S21 | tr D3ZSE0 D3ZSE0_RAT | M(+42.01)QNDAGEFVDLYVPRK(-.98).C                             | 35.68 | 1921.94 | -0.4 |
| 40S ribosomal protein S28 | sp P05765 RS21_RAT   | M(+42.01)QNDAGEFVDLYVPRK.C                                   | 40.97 | 1922.92 | -3.1 |
| 40S ribosomal protein S28 | sp P62859 RS28_RAT   | F.MDDTSRSIIRNVKGPVREGDVLTLLESEREARRLR                        | 25.92 | 4066.18 | -0.6 |
| 40S ribosomal protein S28 | sp P62859 RS28_RAT   | I.RNVKGPVREGDVLTLLESEREARRLR                                 | 34.07 | 3047.71 | -1.3 |
| 40S ribosomal protein S28 | sp P62859 RS28_RAT   | L.TLLESEREARRLR                                              | 20.44 | 1627.91 | -0.4 |
| 40S ribosomal protein S28 | sp P62859 RS28_RAT   | M(+42.01)DTSRVQPIK.L                                         | 37.75 | 1215.63 | -1.5 |
| 40S ribosomal protein S28 | sp P62859 RS28_RAT   | M(+42.01)DTSRVQPIK.L.A                                       | 36.19 | 1328.71 | -1   |
| 40S ribosomal protein S28 | sp P62859 RS28_RAT   | M(+42.01)DTSRVQPIK.L.A.R                                     | 28.27 | 1399.75 | -0.4 |
| 40S ribosomal protein S28 | sp P62859 RS28_RAT   | M(+42.01)DTSRVQPIK.L.A.R.V                                   | 44.41 | 1555.85 | -1.3 |
| 40S ribosomal protein S28 | sp P62859 RS28_RAT   | M(+42.01)DTSRVQPIK.L.A.R.VTK.V.L                             | 28.65 | 1983.13 | -3.6 |
| 40S ribosomal protein S28 | sp P62859 RS28_RAT   | M(+42.01)DTSRVQPIK.L.A.R.VTK.V.L.G.R                         | 18.45 | 2153.24 | 0.1  |
| 40S ribosomal protein S28 | sp P62859 RS28_RAT   | M(+42.01)DTSRVQPIK.L.A.R.VTK.V.L.G.R.T                       | 50.46 | 2309.34 | -1.3 |
| 40S ribosomal protein S28 | sp P62859 RS28_RAT   | N.VKGPVREGDVLTLLESEREARRLR                                   | 17.24 | 2777.56 | 0.4  |
| 40S ribosomal protein S28 | sp P62859 RS28_RAT   | T.SRSIIRNVKGPVREGDVLTLLESEREARRLR                            | 26.51 | 3604.04 | -0.6 |
| 40S ribosomal protein S28 | sp P62859 RS28_RAT   | T.SRSIIRNVKGPVREGDVLTLLESEREARRLR(-.98)                      | 21.19 | 3603.06 | -6.4 |
| 40S ribosomal protein S28 | sp P62859 RS28_RAT   | V.KGPVREGDVLTLLESEREARRLR                                    | 22.15 | 2678.49 | -0.6 |
| 40S ribosomal protein S28 | sp P62859 RS28_RAT   | V.RVEFMDDTSRSIIRNVKGPVREGDVLTLLESEREARRLR                    | 31.56 | 4597.46 | 0.9  |
| 40S ribosomal protein S28 | sp P62859 RS28_RAT   | E.GDVLTLLESEREARRLR                                          | 19.94 | 2012.11 | -1.7 |
| 40S ribosomal protein S28 | sp P62859 RS28_RAT   | V.EFMDDTSRSIIRNVKGPVREGDVLTLLESEREARRLR                      | 16.6  | 4342.29 | -2.2 |
| 40S ribosomal protein S30 | tr Q5BJN7 Q5BJN7_RAT | G.KVHGSLARAGKVRGQ.T                                          | 17.39 | 1562.91 | -0.5 |
| 40S ribosomal protein S30 | tr Q5BJN7 Q5BJN7_RAT | G.KVHGSLARAGKVRGQTPKVAKQEKKKKKTGRAKRRMQYNRRFVNVVPTFGKKKGNANS | 15.6  | 6643.82 | -1.2 |
| 40S ribosomal protein SA  | sp P38983 RSSA_RAT   | M.S(+42.01)GGLDVLQMKEEDV.LK.F                                | 33.71 | 1801.91 | -0.7 |

|                                                               |                      |                                       |       |         |      |
|---------------------------------------------------------------|----------------------|---------------------------------------|-------|---------|------|
| 40S ribosomal protein SA                                      | sp P38983 RSSA_RAT   | M.S(+42.01)GGLDVLQMKEEDV LKFLAAGTHL.G | 37.04 | 2612.35 | -0.7 |
| 60S acidic ribosomal protein P1                               | sp P19944 RLA1_RAT   | A.AGVNVEPFWPGFLFA.K                   | 19.02 | 1502.76 | 0.4  |
| 60S acidic ribosomal protein P1                               | sp P19944 RLA1_RAT   | A.AGVNVEPFWPGFLFAK.A                  | 29.43 | 1630.85 | -2   |
| 60S acidic ribosomal protein P1                               | sp P19944 RLA1_RAT   | A.AGVNVEPFWPGFLFAKA.L                 | 29.13 | 1701.89 | -4.7 |
| 60S acidic ribosomal protein P1                               | sp P19944 RLA1_RAT   | A.AGVNVEPFWPGFLFAKAL.A                | 41.26 | 1814.97 | 1.3  |
| 60S acidic ribosomal protein P1                               | sp P19944 RLA1_RAT   | A.AGVNVEPFWPGFLFAKALA.N               | 19.71 | 1886.01 | -2.3 |
| 60S acidic ribosomal protein P1                               | sp P19944 RLA1_RAT   | A.AGVNVEPFWPGFLFAKALAN.V              | 15.89 | 2000.05 | 1.3  |
| 60S acidic ribosomal protein P1                               | sp P19944 RLA1_RAT   | A.AGVNVEPFWPGFLFAKALAN.V.N            | 32.35 | 2099.12 | 0.9  |
| 60S acidic ribosomal protein P1                               | sp P19944 RLA1_RAT   | A.GVNVEPFWPGFLFAKAL.A                 | 40.57 | 1743.93 | -1.9 |
| 60S acidic ribosomal protein P1                               | sp P19944 RLA1_RAT   | K.AAGVNVEPFWPGFLFAKAL.A               | 34.58 | 1886.01 | -1.4 |
| 60S ribosomal protein L13                                     | tr D3ZD02 D3ZD02_RAT | F.GIRAKRAKEAAEQDVEK.K                 | 25.96 | 1898.03 | 1    |
| 60S ribosomal protein L13                                     | tr D3ZD02 D3ZD02_RAT | F.GIRAKRAKEAAEQDVEKK.K                | 18.75 | 2026.13 | -0.7 |
| 60S ribosomal protein L13                                     | tr D3ZD02 D3ZD02_RAT | F.GIRAKRAKEAAEQDVEKKK                 | 41.31 | 2154.22 | 0.6  |
| 60S ribosomal protein L13                                     | tr D3ZD02 D3ZD02_RAT | G.IRAKRAKEAAEQDVEKKK                  | 44.88 | 2097.2  | 0.4  |
| 60S ribosomal protein L13                                     | tr D3ZD02 D3ZD02_RAT | I.RNVYKKEKARAITEEKN.F                 | 15.96 | 2205.19 | -2.7 |
| 60S ribosomal protein L13                                     | tr D3ZD02 D3ZD02_RAT | L.KLATQLTGPVMP.LR                     | 32.19 | 1367.78 | -0.5 |
| 60S ribosomal protein L3                                      | sp P21531 RL3_RAT    | F.MGPLKKDRIAKEEGA                     | 51.09 | 1641.89 | -0.5 |
| 60S ribosomal protein L31                                     | sp P62902 RL31_RAT   | F.KNLQTVNVDEN                         | 42.52 | 1272.63 | -0.8 |
| 60S ribosomal protein L31                                     | sp P62902 RL31_RAT   | P.AKKGGEKKKGRSAINVVTR E.Y             | 40.81 | 2284.3  | -0.9 |
| 60S ribosomal protein L31                                     | sp P62902 RL31_RAT   | P.AKKGGEKKKGRSAINVVTR E.Y.T           | 28.59 | 2447.36 | -1.5 |
| 60S ribosomal protein L31                                     | sp P62902 RL31_RAT   | Y.RIRVRLSRKRNEDEDSPNKL Y.T            | 21.61 | 2643.43 | -2.3 |
| Ab2-162                                                       | tr Q7TP54 Q7TP54_RAT | G.VAQASLGEYLFERLTLKHD                 | 29.03 | 2189.15 | -1.2 |
| Ac1873                                                        | tr Q7TQ70 Q7TQ70_RAT | E.FIEAGGDIR.G                         | 26.56 | 976.498 | -1   |
| Ac1873                                                        | tr Q7TQ70 Q7TQ70_RAT | T.ADTGTTSEFIEAGGDIR.G                 | 38.35 | 1738.8  | -3.9 |
| Ac1873                                                        | tr Q7TQ70 Q7TQ70_RAT | Y.KMADEAASEAHQEGDTRTT KRGRART.M       | 33.15 | 2872.4  | -2.7 |
| Ac2-246                                                       | tr Q7TPJ6 Q7TPJ6_RAT | L.GSSKTDLFYERKKYGFKKR                 | 28.3  | 2337.26 | -0.7 |
| Acidic leucine-rich nuclear phosphoprotein 32 family member A | sp P49911 AN32A_RAT  | L.SGNKIKDLSTIEPLKKLENL.K              | 27.91 | 2239.28 | -2   |
| Acidic leucine-rich nuclear phosphoprotein 32 family member A | sp P49911 AN32A_RAT  | M(+42.01)EMDKRIYLEL.R                 | 42.78 | 1481.73 | -0.4 |
| Acidic leucine-rich nuclear phosphoprotein 32 family member A | sp P49911 AN32A_RAT  | M(+42.01)EMDKRIYLELRN RTP SDVKEL.V    | 27.3  | 2777.42 | 0.2  |
| Actin alpha skeletal muscle                                   | sp P68136 ACTS_RAT   | L.AGRDLTDYLMKILTERGYSF.V              | 28.51 | 2348.18 | -0.9 |

|                             |                    |                                              |       |         |      |
|-----------------------------|--------------------|----------------------------------------------|-------|---------|------|
| Actin alpha skeletal muscle | sp P68136 ACTS_RAT | L.DLAGRDLTDYLMKILTERGY SF.V                  | 38.14 | 2576.29 | -1.3 |
| Actin alpha skeletal muscle | sp P68136 ACTS_RAT | M.RLDLAGRDLTDY.L                             | 17.9  | 1406.72 | -2.2 |
| Actin alpha skeletal muscle | sp P68136 ACTS_RAT | M.SGGTTMYPGIADRMQKEITA L.A                   | 25.89 | 2239.1  | -2.2 |
| Actin alpha skeletal muscle | sp P68136 ACTS_RAT | Y.PIEHGITNWDDMEKIWHHT                        | 35.15 | 2370.12 | -2.2 |
| Actin alpha skeletal muscle | sp P68136 ACTS_RAT | Y.PIEHGITNWDDMEKIWHHT F.Y                    | 20.24 | 2618.24 | -0.3 |
| Actin alpha skeletal muscle | sp P68136 ACTS_RAT | Y.PIEHGITNWDDMEKIWHHT FYNEL.R                | 23.79 | 3137.47 | -2.4 |
| Actin cytoplasmic 1         | sp P60711 ACTB_RAT | C.DVDIRKDLYANTVL.S                           | 30.9  | 1633.87 | 0.7  |
| Actin cytoplasmic 1         | sp P60711 ACTB_RAT | F.TTTAEREIVRDIKEKLCYV.A                      | 21.3  | 2266.2  | 0.6  |
| Actin cytoplasmic 1         | sp P60711 ACTB_RAT | G.MGQKDSYVGDEAQSKRGIL T.L                    | 18.46 | 2182.07 | 0.4  |
| Actin cytoplasmic 1         | sp P60711 ACTB_RAT | L.DLAGRDLTDYLMKILTE.R                        | 31.1  | 1966.01 | 1.4  |
| Actin cytoplasmic 1         | sp P60711 ACTB_RAT | L.DLAGRDLTDYLMKILTERGY S.F                   | 25.21 | 2429.23 | -3.9 |
| Actin cytoplasmic 1         | sp P60711 ACTB_RAT | L.RVAPEEHPVLLTEA.P                           | 38.78 | 1559.83 | -0.2 |
| Actin cytoplasmic 1         | sp P60711 ACTB_RAT | L.SGGTTMYPGIADRMQKEITA L.A                   | 18.15 | 2239.1  | -1.5 |
| Actin cytoplasmic 1         | sp P60711 ACTB_RAT | V.D(+42.01)IRK(+42.01)DLYAN TVLS(+79.97)G.G  | 15.62 | 1727.81 | 2.5  |
| Actin cytoplasmic 1         | sp P60711 ACTB_RAT | V.GMGQKDSYVGDEAQSKRGI LTL.K                  | 21.1  | 2352.17 | 0.7  |
| Actin cytoplasmic 1         | sp P60711 ACTB_RAT | M.D(+42.01)DDIAALVVDNGSG MCK.A               | 21.61 | 1763.77 | 0.1  |
| Actin cytoplasmic 1         | sp P60711 ACTB_RAT | Y.ALPHAILRL.D                                | 24.91 | 1002.63 | -0.3 |
| Actin cytoplasmic 2         | sp P63259 ACTG_RAT | A.PLNPKANREKMTQIMF.E                         | 15.93 | 1917    | -2.9 |
| Actin cytoplasmic 2         | sp P63259 ACTG_RAT | C.DVDIRKDLYANTVLSGGTT MYPGIADRMQKEITAL.A     | 21.35 | 3854.95 | -1   |
| Actin cytoplasmic 2         | sp P63259 ACTG_RAT | L.AGRDLTDYLMKILTERGYSF. T                    | 28.51 | 2348.18 | -0.9 |
| Actin cytoplasmic 2         | sp P63259 ACTG_RAT | L.DLAGRDLTDYLM(+15.99)KI LTE.R               | 21.64 | 1982    | -0.3 |
| Actin cytoplasmic 2         | sp P63259 ACTG_RAT | L.DLAGRDLTDYLMKILTERGY SF.T                  | 38.14 | 2576.29 | -1.3 |
| Actin cytoplasmic 2         | sp P63259 ACTG_RAT | L.DLAGRDLTDYLMKILTERGY SFTTT.A               | 24.88 | 2879.44 | 3.5  |
| Actin cytoplasmic 2         | sp P63259 ACTG_RAT | L.PHAILRL.D                                  | 24.09 | 818.513 | -0.5 |
| Actin cytoplasmic 2         | sp P63259 ACTG_RAT | L.RLDLAGRDLTDY.L                             | 17.9  | 1406.72 | -2.2 |
| Actin cytoplasmic 2         | sp P63259 ACTG_RAT | L.RVAPEEHPVLLTEA.A                           | 32.02 | 1488.79 | 0.4  |
| Actin cytoplasmic 2         | sp P63259 ACTG_RAT | L.RVAPEEHPVLLTEAPLNPKA NREKMTQIMF.E          | 24.56 | 3458.82 | -7.8 |
| Actin cytoplasmic 2         | sp P63259 ACTG_RAT | L.RVAPEEHPVLLTEAPLNPKA NREKMTQIMFETF(-.98).N | 21.76 | 3834.99 | -5   |
| Actin cytoplasmic 2         | sp P63259 ACTG_RAT | L.RVAPEEHPVLLTEAPLNPKA NREKMTQIMFETF.N       | 21.44 | 3835.98 | -0.4 |
| Actin cytoplasmic 2         | sp P63259 ACTG_RAT | M.E(+42.01)EEIAALVIDNGSGM CK.A               | 30.57 | 1819.83 | 0.9  |
| Actin cytoplasmic 2         | sp P63259 ACTG_RAT | V.APEEHPVLLTEA.P                             | 19.66 | 1304.66 | -0.5 |
| Actin cytoplasmic 2         | sp P63259 ACTG_RAT | Y.NELRVAPEEHPVLL.T                           | 28.24 | 1614.87 | 0.7  |
| Acyl-CoA-binding protein    | sp P11030 ACBP_RAT | A.TVGDVNTDRPGLLDL.K                          | 41.18 | 1583.82 | 0    |



|                                 |                       |                                                                |       |         |      |
|---------------------------------|-----------------------|----------------------------------------------------------------|-------|---------|------|
| Acyl-CoA-binding protein        | sp P11030 ACBP_RAT    | F.KQATVGDVNTDRPGLLDL.K                                         | 42.24 | 1911.01 | -2.5 |
| Acyl-CoA-binding protein        | sp P11030 ACBP_RAT    | G.TSKENAMKTYVEKVEELKK KYGI                                     | 36.4  | 2715.45 | -0.8 |
| Acyl-CoA-binding protein        | sp P11030 ACBP_RAT    | K.GTSKENAMKTYVEKVEELK KKYGI                                    | 36.89 | 2772.47 | -1.6 |
| Acyl-CoA-binding protein        | sp P11030 ACBP_RAT    | K.TYVEKVEELKKKYGI                                              | 42.41 | 1826.02 | -0.5 |
| Acyl-CoA-binding protein        | sp P11030 ACBP_RAT    | L.KGTSKENAMKTYVEKVEEL KKYGI                                    | 27.27 | 2900.57 | -0.7 |
| Acyl-CoA-binding protein        | sp P11030 ACBP_RAT    | M.KTYVEKVEELKKKYGI                                             | 36.19 | 1954.11 | -2.6 |
| Acyl-CoA-binding protein        | sp P11030 ACBP_RAT    | M.S(+42.01)QADFDKAAEEVKR .L                                    | 42.43 | 1634.79 | 0.2  |
| Acyl-CoA-binding protein        | sp P11030 ACBP_RAT    | M.S(+42.01)QADFDKAAEEVKR L.K                                   | 32.3  | 1747.87 | -1.1 |
| Acyl-CoA-binding protein        | sp P11030 ACBP_RAT    | M.S(+42.01)QADFDKAAEEVKR LK.T                                  | 19.91 | 1875.97 | -0.1 |
| Acyl-CoA-binding protein        | sp P11030 ACBP_RAT    | M.S(+42.01)QADFDKAAEEVKR LKTQPTD.E                             | 33.26 | 2418.2  | 0.4  |
| Acyl-CoA-binding protein        | sp P11030 ACBP_RAT    | M.S(+42.01)QADFDKAAEEVKR LKTQPTDEEM(+15.99)LF.I                | 15.17 | 3083.48 | 1.4  |
| Acyl-CoA-binding protein        | sp P11030 ACBP_RAT    | M.S(+42.01)QADFDKAAEEVKR LKTQPTDEEM.L                          | 41.73 | 2807.33 | -2   |
| Acyl-CoA-binding protein        | sp P11030 ACBP_RAT    | M.S(+42.01)QADFDKAAEEVKR LKTQPTDEEM.L.F                        | 21.49 | 2920.41 | -0.9 |
| Acyl-CoA-binding protein        | sp P11030 ACBP_RAT    | M.S(+42.01)QADFDKAAEEVKR LKTQPTDEEMLF.I                        | 24.77 | 3067.48 | -1.4 |
| Acyl-CoA-binding protein        | sp P11030 ACBP_RAT    | M.S(+42.01)QADFDKAAEEVKR LKTQPTDEEMLFY.S                       | 15.71 | 3343.63 | 2.5  |
| Acyl-CoA-binding protein        | sp P11030 ACBP_RAT    | M.S(+42.01)QADFDKAAEEVKR LKTQPTDEEMLFYSH.F                     | 25.22 | 3567.72 | 1.2  |
| Acyl-CoA-binding protein        | sp P11030 ACBP_RAT    | M.S(+42.01)QADFDKAAEEVKR LKTQPTDEEMLFYSHF.K                    | 47.66 | 3714.79 | -2.7 |
| Acyl-CoA-binding protein        | sp P11030 ACBP_RAT    | M.S(+42.01)QADFDKAAEEVKR LKTQPTDEEMLFYSHFKQA.T                 | 49.74 | 4041.98 | -2.7 |
| Acyl-CoA-binding protein        | sp P11030 ACBP_RAT    | M.S(+42.01)QADFDKAAEEVKR LKTQPTDEEMLFYSHFKQATV GDVNTDRPGLLDL.K | 21.67 | 5607.78 | -3.6 |
| Acyl-CoA-binding protein        | sp P11030 ACBP_RAT    | M.SQADFDK(+42.01)AAEEVKR LKTQPTDEEMLFY                         | 16.36 | 3180.56 | -1.9 |
| Acyl-CoA-binding protein        | sp P11030 ACBP_RAT    | M.SQADFDK(+42.01)AAEEVKR LKTQPTDEEMLFYI.S(-.98).H              | 16.1  | 3429.68 | 6.2  |
| Acyl-CoA-binding protein        | sp P11030 ACBP_RAT    | M.SQADFDK(+42.01)AAEEVKR LKTQPTDEEMLFYI.SHF.KQ(-.98).A         | 16.18 | 3969.96 | -1.1 |
| Acyl-CoA-binding protein        | sp P11030 ACBP_RAT    | N.AMKTYVEKVEELKKKYGI                                           | 34.95 | 2156.19 | 0.9  |
| Acyl-CoA-binding protein        | sp P11030 ACBP_RAT    | T.VGDVNTDRPGLLDL.K                                             | 34.48 | 1482.77 | 0.4  |
| Acyl-CoA-binding protein        | sp P11030 ACBP_RAT    | V.EELKKKYGI                                                    | 33.18 | 1106.63 | -0.7 |
| Acyl-CoA-binding protein        | sp P11030 ACBP_RAT    | V.GDVNTDRPGLLDL.K                                              | 21.79 | 1383.7  | -1.8 |
| Acyl-CoA-binding protein        | sp P11030 ACBP_RAT    | Y.VEKVEELKKKYG.I                                               | 32.46 | 1448.82 | 0.5  |
| Acyl-CoA-binding protein        | sp P11030 ACBP_RAT    | Y.VEKVEELKKKYGI                                                | 46.23 | 1561.91 | -0.5 |
| Adducin 3 (Gamma) isoform CRA_b | tr D3ZCH7 D3ZCH7_RA T | F.RTPSFLKKNKKKEKVEA                                            | 45.61 | 2030.2  | -2.6 |

|                                                           |                      |                                                     |       |         |       |
|-----------------------------------------------------------|----------------------|-----------------------------------------------------|-------|---------|-------|
| AHNAK 1                                                   | tr Q38PG2 Q38PG2_RAT | I.KAPKISMPNIDL.N                                    | 41.69 | 1325.74 | -1.2  |
| AHNAK 1                                                   | tr Q38PG2 Q38PG2_RAT | N.APDVDVQGPDWHL.K                                   | 32.08 | 1447.67 | 1     |
| A-kinase anchor protein 12                                | sp Q5QD51 AKA12_RAT  | F.KKSKEDDLETAEKRKEQE.A                              | 26.36 | 2190.11 | -2.1  |
| A-kinase anchor protein 12                                | sp Q5QD51 AKA12_RAT  | K.AQAEEDLQEPKGDLAES                                 | 30.05 | 1828.83 | 1.4   |
| A-kinase anchor protein 12                                | sp Q5QD51 AKA12_RAT  | D.TTVTQTAEAVEKVIETVWISE TG.E                        | 35.6  | 2404.26 | -1.1  |
| A-kinase anchor protein 12                                | tr E9PU09 E9PU09_RAT | S.VAVIDGTRAVTSVEERSPSWI SASVTEPLE.H                 | 25.28 | 3184.63 | 1.7   |
| AKT1 substrate 1 (Proline-rich) (Predicted) isoform CRA_d | tr D3ZH75 D3ZH75_RAT | M.A(+42.01)SGRPEELWEAVVG AAERFRARTGTEL.V            | 24.82 | 2999.52 | -0.3  |
| Alpha II spectrin                                         | tr C9EH87 C9EH87_RAT | M(+42.01)DPSGVKVLETAEDIQ ERRQQVLD.R                 | 28.45 | 2797.39 | 0.2   |
| Alpha-crystallin B chain                                  | sp P23928 CRYAB_RAT  | A.PSWIDTGLSEMRM.E                                   | 40.19 | 1521.7  | -0.1  |
| Alpha-crystallin B chain                                  | sp P23928 CRYAB_RAT  | F.FGEHLLSDFSTATSL.S                                 | 19.93 | 1865.9  | -2.4  |
| Alpha-crystallin B chain                                  | sp P23928 CRYAB_RAT  | L.DVKHFSPEEL.K                                      | 26.23 | 1199.58 | -0.6  |
| Alpha-crystallin B chain                                  | sp P23928 CRYAB_RAT  | L.ESDLFSTATSLSPFYLRPPSFL RA.P                       | 16.86 | 2701.38 | 0.9   |
| Alpha-crystallin B chain                                  | sp P23928 CRYAB_RAT  | L.SPFYLRPPSFL.R                                     | 18.62 | 1322.7  | 1.9   |
| Alpha-crystallin B chain                                  | sp P23928 CRYAB_RAT  | L.SPFYLRPPSFLRA.P                                   | 33.31 | 1549.84 | -2.2  |
| Alpha-crystallin B chain                                  | sp P23928 CRYAB_RAT  | L.SPFYLRPPSFLRAPSWIDTGL. S                          | 19.21 | 2419.27 | 0.6   |
| Alpha-crystallin B chain                                  | sp P23928 CRYAB_RAT  | L.SPFYLRPPSFLRAPSWIDTGL SEM(-.98).R                 | 25.89 | 2765.4  | 2.9   |
| Alpha-crystallin B chain                                  | sp P23928 CRYAB_RAT  | L.SPFYLRPPSFLRAPSWIDTGL SEM.R                       | 51.11 | 2766.38 | 0.6   |
| Alpha-crystallin B chain                                  | sp P23928 CRYAB_RAT  | L.SPFYLRPPSFLRAPSWIDTGL SEMRM.E                     | 22.44 | 3053.53 | -1.1  |
| Alpha-crystallin B chain                                  | sp P23928 CRYAB_RAT  | L.SSDGVLTVNGPRKQASGPER TIPITREEKPAVTAAPKK           | 22.14 | 3985.17 | -0.9  |
| Alpha-crystallin B chain                                  | sp P23928 CRYAB_RAT  | M(+42.01)DIAIHPW.I                                  | 24.22 | 1160.54 | 1     |
| Alpha-crystallin B chain                                  | sp P23928 CRYAB_RAT  | M(+42.01)DIAIHPWIRR.P                               | 25.79 | 1585.83 | -0.4  |
| Alpha-crystallin B chain                                  | sp P23928 CRYAB_RAT  | M(+42.01)DIAIHPWIRRPFFPF HPSRFLDQF.F                | 27    | 3435.72 | -1.7  |
| Alpha-crystallin B chain                                  | sp P23928 CRYAB_RAT  | M(+42.01)DIAIHPWIRRPFFPF HPSRFLDQFFGEHLL.E          | 17.6  | 4132.08 | -12.8 |
| Alpha-crystallin B chain                                  | sp P23928 CRYAB_RAT  | Q.ASGPERTIPITREEKPAVTAA PPK                         | 15.22 | 2546.42 | -0.3  |
| Alpha-crystallin B chain                                  | sp P23928 CRYAB_RAT  | R.PFFPFHSPSRLFDQFFGEH.L                             | 30.62 | 2338.1  | -0.1  |
| Alpha-crystallin B chain                                  | sp P23928 CRYAB_RAT  | R.PFFPFHSPSRLFDQFFGEHL.L                            | 33.13 | 2451.18 | -1.4  |
| Alpha-crystallin B chain                                  | sp P23928 CRYAB_RAT  | V.NGPRKQASGPERTIPITREEK PAVTAAPKK                   | 20.13 | 3226.79 | 0.2   |
| Alpha-internexin                                          | sp P23565 AINX_RAT   | K.TEKSTIEITSSSQKM                                   | 52.57 | 1898.91 | 1.5   |
| Alpha-synuclein                                           | sp P37377 SYUA_RAT   | M(+42.01)DVFMKGLSKAKEGV VA.A                        | 32.87 | 1850.96 | -7.4  |
| Alpha-synuclein                                           | sp P37377 SYUA_RAT   | M(+42.01)DVFMKGLSKAKEGV VAA.A                       | 48.06 | 1922    | -0.8  |
| Alpha-synuclein                                           | sp P37377 SYUA_RAT   | M(+42.01)DVFMKGLSKAKEGV VAAAEKTKQGVAAEAGKTKE GVLY.V | 27.37 | 4081.16 | 0.4   |

|                                                 |                          |                                                                                   |       |         |      |
|-------------------------------------------------|--------------------------|-----------------------------------------------------------------------------------|-------|---------|------|
| Alpha-synuclein                                 | sp P37377 SYUA_RAT       | M(+42.01)DVFMKGLSKAKEGV<br>VAAAETKQGVAAEAGKTKE<br>GVLYVGSKTKEGVVHGVTTV(<br>-98).A | 15.22 | 5659.05 | 6.7  |
| Alpha-synuclein                                 | sp P37377 SYUA_RAT       | M(+42.01)DVFMKGLSKAKEGV<br>VAAAETKQGVAAEAGKTKE<br>GVLYVGSKTKEGVVHGVTTV.<br>A      | 16.74 | 5660.03 | 0.8  |
| Alpha-synuclein                                 | sp P37377 SYUA_RAT       | Y.VGSKTKEGVVHGVTTV.A                                                              | 32.07 | 1596.88 | -0.2 |
| Alpha-synuclein                                 | tr Q3LVE5 Q3LVE5_RA<br>T | A.AEKTQGVAAEAGKTKEGV<br>.L                                                        | 45.83 | 1901.02 | 1.9  |
| Alpha-synuclein                                 | tr Q3LVE5 Q3LVE5_RA<br>T | M(+42.01)DVFMKGLSK.A                                                              | 40.84 | 1196.59 | -3.6 |
| Annexin A1                                      | sp P07150 ANXA1_RAT      | M.A(+42.01)MVSEFLKQA.C                                                            | 37.89 | 1164.58 | -1.5 |
| Annexin A2                                      | sp P07150 ANXA1_RAT      | M.A(+42.01)MVSEFLKQACYIE<br>KQE.Q                                                 | 50.97 | 2057.98 | -2.4 |
| Annexin A2                                      | sp Q07936 ANXA2_RAT      | M.S(+42.01)TVHEILCKLSLEGD<br>H.S                                                  | 34.18 | 1821.89 | -0.4 |
| Annexin A3                                      | sp P07150 ANXA1_RAT      | M.A(+42.01)MVSEFLKQACYIE<br>KQEYEVQAVK.S                                          | 20.92 | 3003.47 | 0.9  |
| Annexin A4                                      | sp P07150 ANXA1_RAT      | M.A(+42.01)MVSEFLKQACYIE<br>KQEYEVQAVKSY.K                                        | 44.35 | 3253.57 | -2.2 |
| Annexin A6                                      | sp P48037 ANXA6_RAT      | M.A(+42.01)KIAQGAMYRG.S                                                           | 20.67 | 1206.62 | -1.3 |
| AP2-associated protein<br>kinase 1              | sp P0C1X8 AAK1_RAT       | V.SDPFIPLQVPDAPEKLI E.L.K                                                         | 20.03 | 2177.16 | -3.7 |
| Apolipoprotein C-II                             | tr G3V8D4 G3V8D4_RA<br>T | A.GIFTDQLLTLLKGE                                                                  | 35.38 | 1546.86 | -4.1 |
| Apolipoprotein C-II                             | tr G3V8D4 G3V8D4_RA<br>T | G.TEEDDPGSSALLDTVQEHL.F                                                           | 37.71 | 2054.93 | 0.2  |
| Apolipoprotein C-II                             | tr G3V8D4 G3V8D4_RA<br>T | Y.AGIFTDQLLTLLKGE                                                                 | 36.82 | 1617.9  | -0.7 |
| Apolipoprotein C-III                            | sp P06759 APOC3_RAT      | A.DEGEGSLLLGSMQGYMEQA<br>SKTVQDALS.S                                              | 36.56 | 2943.35 | 2.4  |
| ATP synthase subunit e<br>mitochondrial         | sp P29419 ATP5I_RAT      | M.VPPVQVSPLIKF.G                                                                  | 38.56 | 1322.8  | -1.8 |
| ATP synthase subunit e<br>mitochondrial         | sp P29419 ATP5I_RAT      | M.VPPVQVSPLIKFGRYS.A                                                              | 29.21 | 1786.01 | -1   |
| ATP synthase subunit e<br>mitochondrial         | sp P29419 ATP5I_RAT      | M.VPPVQVSPLIKFGRYSALILG<br>MAYG.A                                                 | 17.2  | 2675.49 | 2.7  |
| ATP synthase subunit e<br>mitochondrial         | sp P29419 ATP5I_RAT      | M.VPPVQVSPLIKFGRYSALILG<br>MAYGAKRY.S                                             | 33.03 | 3193.78 | -0.3 |
| ATP synthase subunit<br>epsilon mitochondrial   | sp P29418 ATP5E_RAT      | M.VAYWRQAGLSYIRFSQICAK<br>AVRDALKTEFKANA E.KTSGT<br>SITVKIKKE                     | 34.55 | 5632.07 | -0.2 |
| ATP synthase subunit<br>epsilon mitochondrial   | sp P29418 ATP5E_RAT      | G.TSIKTVKIKKE                                                                     | 20.07 | 1273.8  | -0.4 |
| ATP synthase-coupling<br>factor 6 mitochondrial | sp P21571 ATP5J_RAT      | D.PKFEVLDPKQS                                                                     | 31.85 | 1286.69 | 0.5  |
| ATP synthase-coupling<br>factor 6 mitochondrial | sp P21571 ATP5J_RAT      | F.KLKQMYGKGEMDKFPT.F                                                              | 26.61 | 1899.96 | 0.2  |
| ATP synthase-coupling<br>factor 6 mitochondrial | sp P21571 ATP5J_RAT      | F.NFEDPKFEVLDPKQS                                                                 | 33.27 | 1791.87 | -1.9 |
| ATP synthase-coupling<br>factor 6 mitochondrial | sp P21571 ATP5J_RAT      | F.NKELDPVQKFLDKI.R                                                                | 22.88 | 1799.02 | -1   |
| ATP synthase-coupling<br>factor 6 mitochondrial | sp P21571 ATP5J_RAT      | F.NKELDPVQKFLDKIRE.Y                                                              | 26.48 | 2084.16 | 0.9  |
| ATP synthase-coupling<br>factor 6 mitochondrial | sp P21571 ATP5J_RAT      | F.NKELDPVQKFLDKIREY.K                                                             | 53.28 | 2247.23 | 0    |

|                                               |                       |                                                                                 |       |         |      |
|-----------------------------------------------|-----------------------|---------------------------------------------------------------------------------|-------|---------|------|
| ATP synthase-coupling factor 6 mitochondrial  | sp P21571 ATP5J_RAT   | F.NKELDPVQKFLDKIREYKA KRL.A                                                     | 36.79 | 2843.64 | -2.1 |
| ATP synthase-coupling factor 6 mitochondrial  | sp P21571 ATP5J_RAT   | F.PTFNFEDPKFEVLDPKQS                                                            | 15.84 | 2137.04 | 9.6  |
| ATP synthase-coupling factor 6 mitochondrial  | sp P21571 ATP5J_RAT   | L.ASGGPVDTGPEYQQEVDREL.F                                                        | 53.16 | 2145.98 | -3.3 |
| ATP synthase-coupling factor 6 mitochondrial  | sp P21571 ATP5J_RAT   | Y.GKGEMDKFPTNFEDPKFEV LDKPQS                                                    | 18.28 | 3029.45 | 0.2  |
| ATP synthase-coupling factor 6 mitochondrial  | sp P21571 ATP5J_RAT   | Y.KAKRLASGGPVDTGPEYQQ EVDREL.F                                                  | 45.34 | 2742.39 | 2.4  |
| ATPase H transporting lysosomal V1 subunit G1 | tr B2GUV5 B2GUV5_RA T | M.A(+42.01)SQSQGIQQLQAE KRAAEKV.S                                               | 20.97 | 2324.24 | -0.1 |
| ATPase H+ transporting V1 subunit G isoform 2 | tr Q8R2H0 Q8R2H0_RAT  | M.A(+42.01)SQSQGIQQLQAE KRAAEKV.A                                               | 20.97 | 2324.24 | -0.1 |
| ATPase inhibitor mitochondrial                | sp Q03344 ATIF1_RAT   | A.ALKHHHEDEIDHHSKEIER.L                                                         | 32.23 | 2350.18 | 0.8  |
| ATPase inhibitor mitochondrial                | sp Q03344 ATIF1_RAT   | A.LKHHHEDEIDHHSKEIER.L                                                          | 24.64 | 2279.14 | 3.1  |
| ATPase inhibitor mitochondrial                | sp Q03344 ATIF1_RAT   | D.SGAGSIREAGGAFGKREKAE EDR.Y                                                    | 41.35 | 2377.17 | -0.2 |
| ATPase inhibitor mitochondrial                | sp Q03344 ATIF1_RAT   | L.AALKHHHEDEIDHHSKEIER. L                                                       | 55.56 | 2421.21 | -0.1 |
| ATPase inhibitor mitochondrial                | sp Q03344 ATIF1_RAT   | L.KHHHEDEIDHHSKEIER.L                                                           | 34.73 | 2166.06 | -0.7 |
| ATPase inhibitor mitochondrial                | sp Q03344 ATIF1_RAT   | Y.FREKTREQLAALKHHHEDEI DHHSKEIER.L                                              | 36.83 | 3608.86 | -0.2 |
| Band 3 anion transport protein                | sp P23562 B3AT_RAT    | M.G(+42.01)DMQDHEKVLEIPD RDS(+79.97)EEEELEHVIEQIAY.R                            | 27.87 | 3687.63 | -1.4 |
| Band 3 anion transport protein                | sp P23562 B3AT_RAT    | M.G(+42.01)DMQDHEKVLEIPD RDS(+79.97)EEEELEHVIEQIAYR DLD(-.98).I                 | 16.98 | 4185.88 | -4.5 |
| Band 3 anion transport protein                | sp P23562 B3AT_RAT    | M.G(+42.01)DMQDHEKVLEIPD RDS(+79.97)EEEELEHVIEQIAYR DLD.I                       | 31.38 | 4186.87 | -2.1 |
| Basic transcription factor 3                  | tr Q5U3Y8 Q5U3Y8_RA T | I.M(+42.01)NQEKLAKLQAQVR. I                                                     | 39.43 | 1697.92 | 0.9  |
| B-cell leukemia/lymphoma 11B isoform CRA_a    | tr D4A0W4 D4A0W4_RA T | G.P(+42.01)EPEDDEDEEEEEEE LLENESRPESFSM(+15.99)DS ELGRGRENGGGVPPGVAGAG AAAAAL.A | 23.43 | 6083.67 | -8.7 |
| Beta-2-microglobulin                          | sp P07151 B2MG_RAT    | A.IQKTPQIQV.Y                                                                   | 24.43 | 1053.62 | -0.7 |
| Beta-2-microglobulin                          | sp P07151 B2MG_RAT    | A.IQKTPQIQVY.S                                                                  | 36.61 | 1216.68 | 0.3  |
| Beta-glo                                      | tr Q6PDU6 Q6PDU6_RA T | M.VHLTDAE.K                                                                     | 22.62 | 783.376 | -0.2 |
| Beta-glo                                      | tr Q6PDU6 Q6PDU6_RA T | M.VHLTDAEKA.T                                                                   | 32.22 | 982.508 | 0    |
| Beta-glo                                      | tr Q6PDU6 Q6PDU6_RA T | M.VHLTDAEKATV.N                                                                 | 34.24 | 1182.62 | 0    |
| Beta-glo                                      | tr Q6PDU6 Q6PDU6_RA T | M.VHLTDAEKATVNGLWGKV NPVEIGAES.L                                                | 20.36 | 2833.46 | 1.7  |
| Beta-glo                                      | tr Q6PDU6 Q6PDU6_RA T | M.VHLTDAEKATVNGLWGKV NPVEIGAESL.A                                               | 39.83 | 2946.54 | 0.3  |
| Beta-synuclein                                | sp Q63754 SYUB_RAT    | M(+42.01)DVFMKGLSMAKEGV VAAAEKTKQGVTE.A                                         | 40.25 | 2996.5  | -2.1 |
| Beta-synuclein                                | sp Q63754 SYUB_RAT    | M(+42.01)DVFMKGLSMAKEGV VAAAEKTKQGVTEAAEKTKE GVLY.V                             | 26.83 | 4186.14 | -3   |

|                                               |                          |                                                                       |       |         |      |
|-----------------------------------------------|--------------------------|-----------------------------------------------------------------------|-------|---------|------|
| Breast carcinoma-amplified sequence 1 homolog | sp Q3ZB98 BCAS1_RAT      | D.PVSIGPVGKSK                                                         | 29.84 | 1067.63 | -0.5 |
| Breast carcinoma-amplified sequence 1 homolog | sp Q3ZB98 BCAS1_RAT      | G.GFLKGLGPKRMLDAQVQTD<br>PVSIGPVGKSK                                  | 37.31 | 3122.73 | 0.7  |
| Breast carcinoma-amplified sequence 1 homolog | sp Q3ZB98 BCAS1_RAT      | K.GLGPKRMLDAQVQTD<br>PVSIGPVGKSK                                      | 38.1  | 2677.46 | -2.1 |
| Breast carcinoma-amplified sequence 1 homolog | sp Q3ZB98 BCAS1_RAT      | M.S(+42.01)FFKTLVSPNK.T                                               | 42.98 | 1308.71 | -0.9 |
| Calcitonin gene-related peptide 1             | sp P01256 CALCA_RAT      | R.SC(-1.01)NTATC(-<br>1.01)VTHRLAGLLRSRGGVVKD<br>NFVPTNVGSEAF(-.98).G | 29.65 | 3803.88 | 1.6  |
| Calcitonin gene-related peptide 1             | sp P01256 CALCA_RAT      | R.SGGVVKDNFVPTNVGSEAF(-<br>.98).G                                     | 17.39 | 1921.95 | -1.4 |
| Calcitonin gene-related peptide 1             | sp P01256 CALCA_RAT      | R.SC(-1.01)NTATC(-<br>1.01)VTHRLAGLLRSR.S                             | 29.67 | 1899.94 | -3   |
| Calcitonin gene-related peptide 1             | sp P01256 CALCA_RAT      | S.RSGGVVKDNFVPTNVGSEAF<br>(-.98).G                                    | 20.98 | 2078.05 | -1   |
| Calcitonin OS=Rattus norvegicus               | sp P01257 CALC_RAT       | A.VPLRSTLESSPGMAT.L                                                   | 30.62 | 1544.79 | -2.6 |
| Calcitonin OS=Rattus norvegicus               | sp P01257 CALC_RAT       | A.VPLRSTLESSPGMATLSEEEA<br>RLLAALVQN.Y                                | 20.59 | 3181.67 | 1.7  |
| Calcitonin OS=Rattus norvegicus               | sp P01257 CALC_RAT       | A.VPLRSTLESSPGMATLSEEEA<br>RLLAALVQNY.M                               | 37.03 | 3344.73 | -3.9 |
| Calcitonin OS=Rattus norvegicus               | sp P01257 CALC_RAT       | A.VPLRSTLESSPGMATLSEEEA<br>RLLAALVQNYM.Q                              | 27.94 | 3475.77 | -3.2 |
| Calcitonin OS=Rattus norvegicus               | sp P01257 CALC_RAT       | A.VPLRSTLESSPGMATLSEEEA<br>RLLAALVQNYMQM.K                            | 33.9  | 3734.87 | -2.7 |
| Calpain small subunit 1                       | tr M0RD20 M0RD20_RA<br>T | M(+42.01)FLVNSFLKGGGGGG<br>GGGGLGGGLG.N                               | 26.92 | 2164.07 | -2.3 |
| Calpain small subunit 1                       | tr M0RD20 M0RD20_RA<br>T | M(+42.01)FLVNSFLKGGGGGG<br>GGGGLGGGLGN.V                              | 28.49 | 2278.12 | -0.4 |
| Calpain small subunit 1                       | tr M0RD20 M0RD20_RA<br>T | M(+42.01)FLVNSFLKGGGGGG<br>GGGG.L                                     | 26.85 | 1709.82 | 0.2  |
| Calpain small subunit 1                       | tr M0RD20 M0RD20_RA<br>T | M(+42.01)FLVNSFLKGGGGGG<br>GGGGLG.G                                   | 41.02 | 1879.93 | -2.7 |
| CAP-Gly domain-containing linker protein 2    | tr G3V949 G3V949_RAT     | G.LDKEKSLSEQK(+42.01)(-<br>.98).R                                     | 23.14 | 1344.72 | -7.1 |
| Catenin beta-1                                | sp Q9WU82 CTNB1_RA<br>T  | M.A(+42.01)TQADLMELDMAM<br>EPDRKAAVSHWQQ.Q                            | 35.15 | 3013.37 | -1.5 |
| Cathepsin B                                   | tr Q6IN22 Q6IN22_RAT     | K.HEAGDVM(+15.99)GGHAIR.I                                             | 28.78 | 1364.63 | 0    |
| Cathepsin B                                   | tr Q6IN22 Q6IN22_RAT     | K.HEAGDVMGGHAIR.I                                                     | 27.15 | 1348.63 | -0.4 |
| Cathepsin B                                   | tr Q6IN22 Q6IN22_RAT     | N.LPESFDAREQW.S                                                       | 41.92 | 1376.64 | -0.5 |
| Cathepsin B                                   | tr Q6IN22 Q6IN22_RAT     | S.VSDSEKEIMAEIYKNGPVE.G                                               | 37.72 | 2137.02 | -1.7 |
| Cathepsin B                                   | tr Q6IN22 Q6IN22_RAT     | T.SYSVSDSEKEIMAEIYKNGPV<br>EGAFT.V                                    | 20.41 | 2850.33 | -3.1 |
| Cathepsin B                                   | tr Q6IN22 Q6IN22_RAT     | W.NVDWGDNGFFK.I                                                       | 22.56 | 1297.57 | -0.9 |
| Cathepsin B                                   | tr Q6IN22 Q6IN22_RAT     | W.NVDWGDNGFFKIL.R                                                     | 18.89 | 1523.74 | -0.5 |
| Cathepsin B                                   | tr Q6IN22 Q6IN22_RAT     | Y.SVSDSEKEIMAEIYKNGPVE.<br>G                                          | 19.41 | 2224.06 | -1.4 |
| Cathepsin D                                   | tr Q6P6T6 Q6P6T6_RAT     | L.PVFDNLMK.Q                                                          | 22.38 | 962.49  | -0.8 |
| Cathepsin D                                   | tr Q6P6T6 Q6P6T6_RAT     | L.PVFDNLMKQKLVEKN.I                                                   | 25.22 | 1801.98 | 0.1  |

|                                                  |                         |                                                                |       |         |      |
|--------------------------------------------------|-------------------------|----------------------------------------------------------------|-------|---------|------|
| Cathepsin D                                      | tr Q6P6T6 Q6P6T6_RAT    | L.PVFDNLMKQKLVKNI.F                                            | 35.75 | 2149.16 | -0.1 |
| Cathepsin D                                      | tr Q6P6T6 Q6P6T6_RAT    | L.PVFDNLMKQKLVKNI.F.Y                                          | 44.71 | 2296.23 | -1.2 |
| Cathepsin L1                                     | sp P07154 CATL1_RAT     | N.KDKYWL.VKN.S                                                 | 27.92 | 1192.66 | 0.3  |
| Cathepsin L1                                     | sp P07154 CATL1_RAT     | N.KDKYWL.V                                                     | 17.5  | 851.454 | 0.6  |
| Cathepsin L1                                     | sp P07154 CATL1_RAT     | V.AMDASHPSLQFY.S                                               | 23.49 | 1365.6  | -0.4 |
| Caveolin 1                                       | tr Q8R4A2 Q8R4A2_RAT    | M.S(+42.01)GGKYVDSEGHLY                                        | 43.52 | 1289.59 | -1.4 |
| Caveolin 1                                       | tr Q8R4A2 Q8R4A2_RAT    | M.S(+42.01)GGKYVDSEGHLY.T                                      | 43.78 | 1452.65 | -1.3 |
| Caveolin 1                                       | tr Q8R4A2 Q8R4A2_RAT    | M.S(+42.01)GGKYVDSEGHLYT<br>VPIREQG.N                          | 40.95 | 2333.13 | -4.2 |
| Caveolin 1                                       | tr Q8R4A2 Q8R4A2_RAT    | M.S(+42.01)GGKYVDSEGHLYT<br>VPIREQGNIY.K                       | 28.31 | 2723.32 | 2.8  |
| Caveolin 1                                       | tr Q8R4A2 Q8R4A2_RAT    | M.S(+42.01)GGKYVDSEGHLYT<br>VPIREQGNIYKPNN.K                   | 34.56 | 3176.55 | -0.9 |
| Chaperonin 10                                    | tr P97601 P97601_RAT    | M.AGQAFRK(+42.01)FLPLFDR<br>VLVERSAETVTKGGIMLPEK<br>SQGKVLQA.T | 19.85 | 4727.59 | 0.3  |
| Chymase                                          | sp P50339 CMA1_RAT      | A.KLTLGVGTLPL.S                                                | 31.37 | 1110.7  | 0.3  |
| Cofilin-1                                        | sp P45592 COF1_RAT      | M.A(+42.01)SGVAVSDGVIKVF<br>NDMKVRKS.S                         | 18.7  | 2348.25 | -4.1 |
| Cofilin-1                                        | sp P45592 COF1_RAT      | S.SKDAIKKLTGIKHE                                               | 16.78 | 1565.96 | 1.1  |
| Cofilin-1                                        | sp P45592 COF1_RAT      | V.FNDMKVRKSS'TPEEVKKRK<br>KAV.L                                | 22.11 | 2604.45 | -0.2 |
| Cofilin-1                                        | sp P45592 COF1_RAT      | M.A(+42.01)SGVAVSDGVIKVF<br>NDMKV.R                            | 43.01 | 1977.02 | 0.1  |
| Cofilin-1                                        | sp P45592 COF1_RAT      | M.A(+42.01)SGVAVSDGVIKVF<br>NDMKVR.K                           | 35.46 | 2133.13 | -0.2 |
| Collagen alpha-2(I)<br>chain                     | tr F1LS40 F1LS40_RAT    | D.FGFEEDFYR.A                                                  | 25.84 | 1136.49 | 1.1  |
| Collagen alpha-2(I)<br>chain                     | tr F1LS40 F1LS40_RAT    | F.GFEEDFYR.A                                                   | 31.52 | 989.424 | -0.6 |
| Collagen alpha-2(I)<br>chain                     | tr F1LS40 F1LS40_RAT    | G.FEEDFYR.A                                                    | 22.01 | 932.403 | 0.6  |
| Collagen alpha-2(I)<br>chain                     | tr F1LS40 F1LS40_RAT    | G.GGYDFGFEEDFYR.A.D                                            | 26.84 | 1599.66 | -0.3 |
| Collagen alpha-2(I)<br>chain                     | tr F1LS40 F1LS40_RAT    | Y.DFGEEDFYR.A                                                  | 19.26 | 1251.52 | 2.1  |
| Complement C3                                    | tr M0RBJ7 M0RBJ7_RAT    | R.SSPTVFRLLWESGLLR.S                                           | 25.31 | 1947.06 | -0.1 |
| Complexin-1                                      | sp P63041 CPLX1_RAT     | M(+42.01)EFVMKQALGGATKD<br>MGK.M                               | 50.25 | 1982.96 | -0.9 |
| Complexin-1                                      | sp P63041 CPLX1_RAT     | M(+42.01)EFVMKQALGGATKD<br>MGKMLGGDEEKD.P                      | 41.55 | 2957.36 | -1.3 |
| Copper transport protein<br>ATOX1                | sp Q9WUC4 ATOX1_RA<br>T | A.TLNKTGKAVSYLGP                                               | 41.4  | 1575.9  | -0.2 |
| Copper transport protein<br>ATOX1                | sp Q9WUC4 ATOX1_RA<br>T | L.NKTGKAVSYLGP                                                 | 34.38 | 1361.77 | -1.1 |
| Creatine kinase<br>mitochondrial 1<br>ubiquitous | tr Q5BJT9 Q5BJT9_RAT    | M.A(+42.01)GPFRRLLSARPLK<br>LLALAGAGSLAAGILLRPESVR<br>A.A      | 27.34 | 3811.23 | 0.4  |
| Creatine kinase M-type                           | sp P00564 KCRM_RAT      | F.TLDDVIQTGVDNPGHPF.I                                          | 26.06 | 1823.87 | -0.6 |
| Creatine kinase M-type                           | sp P00564 KCRM_RAT      | Y.NKLRDKETPSGFTLDDVIQT<br>GVDNPGHPF.I                          | 20.37 | 3196.58 | -1.9 |
| Cysteine-rich protein 1                          | sp P63255 CRIP1_RAT     | M.PKC(-1.01)PKC(-<br>1.01)DKEVYFAER.V                          | 18.61 | 1809.85 | 0.5  |
| Cysteine-rich protein 1                          | sp P63255 CRIP1_RAT     | M.PKC(-1.01)PKC(-<br>1.01)DKEVYFAERVT.S                        | 38.73 | 2009.97 | 0.2  |

|                                                            |                          |                                                    |       |         |      |
|------------------------------------------------------------|--------------------------|----------------------------------------------------|-------|---------|------|
| Cysteine-rich protein 2                                    | sp P36201 CRIP2_RAT      | Y.IYDKDPEGTVQP                                     | 22.22 | 1360.65 | 0.4  |
| Cysteine-rich protein 2                                    | sp P36201 CRIP2_RAT      | Y.IYEKPPTEAPQVTGPIEVPVV<br>RTEERKTS.G              | 19.97 | 3249.72 | 1    |
| Cysteine-rich protein 2                                    | sp P36201 CRIP2_RAT      | M.A(+42.01)SKC(-1.01)PKC(-<br>1.01)DKTVYFAEKV.S    | 33.76 | 1955.95 | -1.5 |
| Cysteine-rich protein 2                                    | sp P36201 CRIP2_RAT      | M.A(+42.01)SKC(-1.01)PKC(-<br>1.01)DKTVYFAEKVSSL.G | 37.4  | 2243.1  | -0.3 |
| Cytochrome b-c1<br>complex subunit 7                       | tr B2RYS2 B2RYS2_RAT     | A.AGFNKLGLM                                        | 16.12 | 818.465 | -0.5 |
| Cytochrome b-c1<br>complex subunit 7                       | tr B2RYS2 B2RYS2_RAT     | M.A(+42.01)GRPAVAASSKWLD<br>GF.R                   | 34.68 | 1673.85 | -1.1 |
| Cytochrome b-c1<br>complex subunit 7                       | tr B2RYS2 B2RYS2_RAT     | M.A(+42.01)GRPAVAASSKWLD<br>GFRKWYYNA.A            | 36.74 | 2655.33 | -3   |
| Cytochrome b-c1<br>complex subunit Rieske<br>mitochondrial | sp P20788 UCRI_RAT       | A.TRPLVATVGLNVPASVRY.S                             | 27.88 | 1912.09 | 0.1  |
| Cytochrome b-c1<br>complex subunit Rieske<br>mitochondrial | sp P20788 UCRI_RAT       | R.PLVATVGLNVPASVRY.S                               | 37.93 | 1654.94 | -0.5 |
| Cytochrome b-c1<br>complex subunit Rieske<br>mitochondrial | sp P20788 UCRI_RAT       | V.GLNVPASVRY.S                                     | 34.46 | 1074.58 | 0    |
| Cytochrome b-c1<br>complex subunit Rieske<br>mitochondrial | sp P20788 UCRI_RAT       | L.SGQAATRPLVATVGLNVPAS<br>VRY.S                    | 41.28 | 2326.28 | 3.2  |
| Cytochrome b-c1<br>complex subunit Rieske<br>mitochondrial | sp P20788 UCRI_RAT       | M(+42.01)LSVAARSGPFAPVLS<br>ATSR.G                 | 29.29 | 2059.09 | -3.9 |
| Cytochrome c oxidase<br>subunit 2                          | tr Q8SEZ5 Q8SEZ5_RAT     | L.EMVPLKYFENWSASMI                                 | 39.24 | 1943.92 | -2.8 |
| Cytochrome c oxidase<br>subunit 2                          | tr Q9QWQ4 Q9QWQ4_R<br>AT | M.A(+42.01)NLERTFIAIKPDGV.<br>Q                    | 20.71 | 1684.91 | -2.1 |
| Cytochrome c oxidase<br>subunit 5A<br>mitochondrial        | sp P11240 COX5A_RAT      | E.LRPTLNELGISTPEELGLDKV                            | 29.96 | 2293.25 | 0.3  |
| Cytochrome c oxidase<br>subunit 5A<br>mitochondrial        | sp P11240 COX5A_RAT      | I.QELRPTLNEL.G                                     | 20.08 | 1211.65 | 1.2  |
| Cytochrome c oxidase<br>subunit 5A<br>mitochondrial        | sp P11240 COX5A_RAT      | I.QELRPTLNELGISTPEELGLDK<br>.V                     | 15.94 | 2451.29 | 0.2  |
| Cytochrome c oxidase<br>subunit 5A<br>mitochondrial        | sp P11240 COX5A_RAT      | I.QELRPTLNELGISTPEELGLDK<br>V                      | 19.06 | 2550.35 | 2    |
| Cytochrome c oxidase<br>subunit 5A<br>mitochondrial        | sp P11240 COX5A_RAT      | L.GISTPEELGLDKV                                    | 36.09 | 1356.71 | 0    |
| Cytochrome c oxidase<br>subunit 5A<br>mitochondrial        | sp P11240 COX5A_RAT      | L.NDFASAVRILEV.V                                   | 47.53 | 1332.7  | 0    |
| Cytochrome c oxidase<br>subunit 5A<br>mitochondrial        | sp P11240 COX5A_RAT      | L.VGYDLVPEPKIIDA.A                                 | 30.74 | 1527.82 | -0.6 |
| Cytochrome c oxidase<br>subunit 5A<br>mitochondrial        | sp P11240 COX5A_RAT      | L.VPEPKIIDA.A                                      | 31.82 | 980.554 | 0.2  |
| Cytochrome c oxidase<br>subunit 5A<br>mitochondrial        | sp P11240 COX5A_RAT      | Y.DLVPEPKIIDAALRA.C                                | 21    | 1619.92 | -0.4 |
| Cytochrome c oxidase                                       | sp P11240 COX5A_RAT      | Y.FNKPDIDAWEL.R                                    | 25.95 | 1346.65 | 0.1  |

|                                                      |                      |                                                                          |       |         |       |
|------------------------------------------------------|----------------------|--------------------------------------------------------------------------|-------|---------|-------|
| subunit 5A<br>mitochondrial                          |                      |                                                                          |       |         |       |
| Cytochrome c oxidase<br>subunit 5A<br>mitochondrial  | sp P11240 COX5A_RAT  | Y.VIQELRPTLNELGISTPEELGL<br>DKV                                          | 28.88 | 2762.51 | 2.3   |
| Cytochrome c oxidase<br>subunit 6A1<br>mitochondrial | sp P10818 CX6A1_RAT  | F.HNPHMNPLPTGYEDE                                                        | 53.28 | 1749.74 | -1.1  |
| Cytochrome c oxidase<br>subunit 6A1<br>mitochondrial | sp P10818 CX6A1_RAT  | L.FHNPHMNPLPTGYEDE                                                       | 50.78 | 1896.81 | -1    |
| Cytochrome c oxidase<br>subunit 6A1<br>mitochondrial | sp P10818 CX6A1_RAT  | M.SSGAHGEEGSARIWKA.L                                                     | 45.54 | 1641.79 | -0.7  |
| Cytochrome c oxidase<br>subunit 6A1<br>mitochondrial | sp P10818 CX6A1_RAT  | M.SSGAHGEEGSARIWKALT.Y                                                   | 37.86 | 1855.92 | -0.7  |
| Cytochrome c oxidase<br>subunit 6A1<br>mitochondrial | sp P10818 CX6A1_RAT  | M.SSGAHGEEGSARIWKALTY.<br>F                                              | 47.08 | 2018.98 | -1.2  |
| Cytochrome c oxidase<br>subunit 6A1<br>mitochondrial | sp P10818 CX6A1_RAT  | M.SSGAHGEEGSARIWKALTYF<br>V.A                                            | 25.35 | 2265.12 | -2.7  |
| Cytochrome c oxidase<br>subunit 6A1<br>mitochondrial | sp P10818 CX6A1_RAT  | N.PHMNPLPTGYEDE                                                          | 21.22 | 1498.64 | 0.7   |
| Cytochrome c oxidase<br>subunit 6B1                  | tr D3ZD09 D3ZD09_RAT | C.PVSWVSAWDDRIAEGTFPGK<br>I                                              | 25.14 | 2330.17 | 3.7   |
| Cytochrome c oxidase<br>subunit 6B1                  | tr D3ZD09 D3ZD09_RAT | M.A(+42.01)EDIKTKIKNY.K                                                  | 45.04 | 1363.73 | -1.7  |
| Cytochrome c oxidase<br>subunit 6B1                  | tr D3ZD09 D3ZD09_RAT | M.A(+42.01)EDIKTKIKNYKT.A                                                | 38.36 | 1592.88 | -1.7  |
| Cytochrome c oxidase<br>subunit 6B1                  | tr D3ZD09 D3ZD09_RAT | M.A(+42.01)EDIKTKIKNYKTAP<br>F.D                                         | 23.66 | 1908.04 | -1.8  |
| Cytochrome c oxidase<br>subunit 6B1                  | tr D3ZD09 D3ZD09_RAT | M.A(+42.01)EDIKTKIKNYKTAP<br>FDSRFPNQQT.K                                | 35.43 | 3095.57 | -14.3 |
| Cytochrome c oxidase<br>subunit 6B1                  | tr D3ZD09 D3ZD09_RAT | M.A(+42.01)EDIKTKIKNYKTAP<br>FDSRFPNQQT.KNC(-<br>1.01)WQNYLDFHRC(-.98).E | 18.51 | 4801.32 | -5    |
| Cytochrome c oxidase<br>subunit 6B1                  | tr D3ZD09 D3ZD09_RAT | S.AWDDRIAEGTFPGKI                                                        | 22.15 | 1674.84 | -6    |
| Cytochrome c oxidase<br>subunit 6B1                  | tr D3ZD09 D3ZD09_RAT | V.SAWDDRIAEGTFPGKI                                                       | 23.34 | 1761.87 | 1.2   |
| Cytochrome c oxidase<br>subunit 6B1                  | tr D3ZD09 D3ZD09_RAT | V.SWVSAWDDRIAEGTFPGKI                                                    | 37.25 | 2134.05 | -2.2  |
| Cytochrome c oxidase<br>subunit 6B1                  | tr D3ZD09 D3ZD09_RAT | W.DDRIAEGTFPGKI                                                          | 28.76 | 1417.72 | 0.3   |
| Cytochrome c oxidase<br>subunit 6B1                  | tr D3ZD09 D3ZD09_RAT | W.VSAWDDRIAEGTFPGKI                                                      | 28.46 | 1860.94 | 0     |
| Cytochrome c oxidase<br>subunit 6B1                  | tr D3ZD09 D3ZD09_RAT | M.A(+42.01)EDIKTKI.K                                                     | 24.66 | 958.533 | -0.7  |
| Cytochrome c oxidase<br>subunit 6B1                  | tr D3ZD09 D3ZD09_RAT | M.A(+42.01)EDIKTKIKN.Y                                                   | 37.66 | 1200.67 | -0.6  |
| Cytochrome c oxidase<br>subunit 8B<br>mitochondrial  | sp P16221 COX8B_RAT  | R.ISSKPAKSPTSAMDQAVGMS<br>VIIAGFMVPAGWVLSHLESYK<br>RSSAA                 | 31.07 | 4762.43 | -0.4  |
| Dihydropyrimidinase-<br>related protein 2            | sp P47942 DPYL2_RAT  | S.SAKTSPAKQQAPPVRNLHQS<br>GFSL.S.G                                       | 31.39 | 2635.38 | 3.2   |
| Dihydropyrimidinase-<br>related protein 2            | sp P47942 DPYL2_RAT  | S.SAKTSPAKQQAPPVRNLHQS<br>GFSL.S.G.A                                     | 38.7  | 2692.4  | 0.3   |



|                                                   |                          |                                                       |       |         |      |
|---------------------------------------------------|--------------------------|-------------------------------------------------------|-------|---------|------|
| Dihydropyrimidinase-related protein 2             | sp P47942 DPYL2_RAT      | S.SAKTSPAKQQAPPVRNLHQS<br>GFSLSGAQIDNIPRRTTQRIV.<br>A | 34.01 | 4569.43 | 1.3  |
| Dihydropyrimidinase-related protein 2             | sp P47942 DPYL2_RAT      | S.SAKTSPAKQQAPPVRNLH.Q                                | 24.22 | 1929.05 | -0.2 |
| Dihydropyrimidinase-related protein 2             | sp P47942 DPYL2_RAT      | V.APPGGRANITSLG                                       | 32.08 | 1209.65 | -0.7 |
| EF-hand domain-containing protein D2              | sp Q4FZY0 EFHD2_RAT      | M.A(+42.01)TDELASKLSR.R                               | 33.08 | 1231.64 | 0.4  |
| Elongation factor 1-alpha                         | tr F1M6C2 F1M6C2_RAT     | A.VGVKAVDKKAAG.A                                      | 36.6  | 1254.77 | -0.5 |
| Elongation factor 1-alpha                         | tr F1M6C2 F1M6C2_RAT     | A.VGVKAVDKKAAGAGKVTK<br>.S                            | 36.54 | 1839.13 | -1.2 |
| Elongation factor 1-alpha                         | tr F1M6C2 F1M6C2_RAT     | A.VGVKAVDKKAAGAGKVTK<br>SAQKAQKA.K                    | 45.92 | 2651.58 | 0.9  |
| Elongation factor 1-alpha                         | tr F1M6C2 F1M6C2_RAT     | A.VGVKAVDKKAAGAGKVTK<br>SAQKAQKAK                     | 24.37 | 2779.68 | 0.6  |
| Elongation factor 1-alpha                         | tr F1M6C2 F1M6C2_RAT     | G.VIKAVDKKAAGAGKVTKSA<br>QKAQKAK                      | 23.55 | 2623.59 | -0.1 |
| Elongation factor 1-alpha                         | tr F1M6C2 F1M6C2_RAT     | Y.KIGGIGTVPVGRVETGVLPK<br>GMVVT.F                     | 37.75 | 2463.42 | -1.3 |
| Elongation factor 1-alpha 1                       | sp P62632 EF1A2_RAT      | Y.KIGGIGTVPVGRVETGILRPG<br>MVVT.F                     | 21.86 | 2505.45 | 0.5  |
| Elongation factor 1-alpha 1                       | sp P62630 EF1A1_RAT      | Y.TLGVKQLIVGVNKMDSTEPP<br>YSQKRYEEIVKEVST.Y           | 18.48 | 3965.08 | -1.1 |
| Elongation factor 1-delta                         | sp Q68FR9 EF1D_RAT       | M.A(+42.01)TNFLMHEKIWFDK<br>F.K                       | 39.04 | 1967.96 | -1   |
| Enthoprotin                                       | tr Q6DGF2 Q6DGF2_RA<br>T | M(+42.01)LNMWKVREL.V                                  | 34.71 | 1360.7  | -1.7 |
| Eukaryotic translation elongation factor 1 beta 2 | tr B5DEN5 B5DEN5_RA<br>T | C.VRSIQADGL.V                                         | 30.53 | 957.524 | 0.1  |
| Eukaryotic translation elongation factor 1 beta 2 | tr B5DEN5 B5DEN5_RA<br>T | C.VVEDDKVGTDMLEEQITAFE<br>DYVQSMDDVAAFNKI             | 23.28 | 3848.8  | -0.1 |
| Eukaryotic translation elongation factor 1 beta 2 | tr B5DEN5 B5DEN5_RA<br>T | L.VWGSSKLVVPGY.G                                      | 21.51 | 1290.7  | -1.4 |
| Eukaryotic translation elongation factor 1 beta 2 | tr B5DEN5 B5DEN5_RA<br>T | M.GFGDLKTPAGLQVL.N                                    | 40.03 | 1414.78 | -1.2 |
| Eukaryotic translation elongation factor 1 beta 2 | tr B5DEN5 B5DEN5_RA<br>T | M.GFGDLKTPAGLQVLND.Y                                  | 33.46 | 1643.85 | 1.2  |
| Eukaryotic translation elongation factor 1 beta 2 | tr B5DEN5 B5DEN5_RA<br>T | M.GFGDLKTPAGLQVLNDY.L                                 | 31.1  | 1806.92 | 1.5  |
| Eukaryotic translation elongation factor 1 beta 2 | tr B5DEN5 B5DEN5_RA<br>T | M.GFGDLKTPAGLQVLNDYL.A                                | 53.38 | 1920    | -0.7 |
| Eukaryotic translation elongation factor 1 beta 2 | tr B5DEN5 B5DEN5_RA<br>T | M.GFGDLKTPAGLQVLNDYLA<br>DKSYIEGY.V                   | 16.58 | 2946.47 | 2.7  |
| Eukaryotic translation elongation factor 1 beta 2 | tr B5DEN5 B5DEN5_RA<br>T | M.GFGDLKTPAGLQVLNDYLA<br>DKSYIEGYVPSQADVAVFEALS       | 26.45 | 4273.15 | -0.7 |
| Eukaryotic translation elongation factor 1 beta 2 | tr B5DEN5 B5DEN5_RA<br>T | E.DDKVGTDMLEEQITAFEDYV<br>QSMDDVAAFNKI                | 32.3  | 3521.62 | 2.1  |

|                                                   |                      |                                        |       |         |      |
|---------------------------------------------------|----------------------|----------------------------------------|-------|---------|------|
| Eukaryotic translation elongation factor 1 beta 2 | tr B5DEN5 B5DEN5_RAT | M.GFGDLKTPAGLQV.L                      | 39.15 | 1301.7  | 0    |
| Eukaryotic translation initiation factor 1        | tr B0K008 B0K008_RAT | I.GLAKDDQLKVHGF                        | 43.28 | 1426.76 | 0.1  |
| Eukaryotic translation initiation factor 4B       | tr Q5RKG9 Q5RKG9_RAT | F.LGNLPYDVTEDSIKDFFRGL.N               | 30.51 | 2298.15 | -3.5 |
| Eukaryotic translation initiation factor 4H       | sp Q5XI72 IF4H_RAT   | Q.LKPRTVATPLNQVANPNSAIFGGARPREVVQKEQE  | 37.02 | 3943.1  | 0    |
| Eukaryotic translation initiation factor 4H       | sp Q5XI72 IF4H_RAT   | R.TVATPLNQVANPNSAIFGGARPREVVQKEQE      | 25.82 | 3448.77 | -1.6 |
| Eukaryotic translation initiation factor 4H       | sp Q5XI72 IF4H_RAT   | T.PLNQVANPNSAIFGGARPREVVQKEQE          | 15.17 | 2236.13 | 0    |
| Eukaryotic translation initiation factor 4H       | sp Q5XI72 IF4H_RAT   | T.PLNQVANPNSAIFGGARPREVVQKEQE          | 32.09 | 3076.57 | -3.4 |
| Eukaryotic translation initiation factor 4H       | sp Q5XI72 IF4H_RAT   | V.ATPLNQVANPNSAIFGGARPREVVQKEQE        | 27.49 | 3248.65 | -4.1 |
| Eukaryotic translation initiation factor 4H       | sp Q5XI72 IF4H_RAT   | V.QGDIDAIFKDLRSV.R                     | 45.2  | 1775.94 | -1.7 |
| Eukaryotic translation initiation factor 4H       | sp Q5XI72 IF4H_RAT   | Y.VGNLPFNTVQGDIDAIFKDLRSV.R            | 37.56 | 2717.44 | -2.8 |
| Fatty acid-binding protein epidermal              | sp P55053 FABP5_RAT  | M.A(+42.01)SLKDLEGWRL.V                | 38.64 | 1456.8  | -0.4 |
| Fibrinogen alpha chain                            | tr F7EUB6 F7EUB6_RAT | Y.KMADEAASEAHQEGDTRTKRGRARTM.R         | 28.61 | 3003.44 | -0.5 |
| Fibrinogen beta chain                             | sp P14480 FIBB_RAT   | A.ATTDSKVDLSIAR.G                      | 54.85 | 1490.76 | -0.2 |
| Fibrinogen beta chain                             | sp P14480 FIBB_RAT   | A.TTDSKVDLSIAR.G                       | 31.53 | 1419.72 | -2.3 |
| Fibrinogen beta chain                             | sp P14480 FIBB_RAT   | L.V(+42.01)QTQAAT(+79.97)TDSKVDLSIAR.G | 16.13 | 2140    | -7.2 |
| Fibrinogen beta chain                             | sp P14480 FIBB_RAT   | R.GHRPVDRRKEEPPSLRPAPPISGGGYRPAK.V     | 24.5  | 3600.96 | 1.2  |
| Fibrinogen beta chain                             | sp P14480 FIBB_RAT   | Y.LIQDPTSSKPY.R                        | 39.74 | 1247.64 | -0.1 |
| Fibrinogen gamma chain                            | sp P02680 FIBG_RAT   | F.RVGPESDKYRLT.Y                       | 40.13 | 1419.75 | -0.5 |
| Fibrinogen gamma chain                            | sp P02680 FIBG_RAT   | Y.KEGFGHLSPTGTTEF.W                    | 38.06 | 1606.76 | -3.1 |
| Fructose-bisphosphate aldolase A                  | sp P05065 ALDOA_RAT  | C.PLLKPWALTF.S                         | 34.43 | 1184.7  | -0.6 |
| Fructose-bisphosphate aldolase A                  | sp P05065 ALDOA_RAT  | L.KAWGGKKNLKAQEE.Y                     | 45.98 | 1785.94 | -1.9 |
| Fructose-bisphosphate aldolase A                  | sp P05065 ALDOA_RAT  | P.EQK(+42.01)KELADIA.H                 | 16.23 | 1185.62 | -0.9 |
| Galectin-1                                        | sp P11762 LEG1_RAT   | A.DLTIKL.P                             | 19.94 | 701.432 | 2    |
| Galectin-1                                        | sp P11762 LEG1_RAT   | A.DLTIKLPDGHEFK.K                      | 17.77 | 1383.7  | -1.3 |
| Galectin-1                                        | sp P11762 LEG1_RAT   | A.DLTIKLPDGHEFKF.P                     | 53.62 | 1658.87 | -1.8 |
| Galectin-1                                        | sp P11762 LEG1_RAT   | A.DLTIKLPDGHEFKFPNRL.N                 | 39.38 | 2139.15 | -0.1 |
| Galectin-1                                        | sp P11762 LEG1_RAT   | A.DLTIKLPDGHEFKFPNRLNME                | 44.78 | 2384.23 | 1.6  |
| Galectin-1                                        | sp P11762 LEG1_RAT   | A.DLTIKLPDGHEFKFPNRLNME.A              | 48.53 | 2513.27 | 1.5  |
| Galectin-1                                        | sp P11762 LEG1_RAT   | A.DLTIKLPDGHEFKFPNRLNME.A.I            | 32.34 | 2584.31 | 0.7  |
| Galectin-1                                        | sp P11762 LEG1_RAT   | A.DLTIKLPDGHEFKFPNRLNME.A.I.N          | 34.07 | 2697.39 | -0.5 |
| Galectin-1                                        | sp P11762 LEG1_RAT   | A.DLTIKLPDGHEFKFPNRLNME.A.I.NY.M       | 16.19 | 2974.5  | -0.7 |

|            |                    |                                                          |       |         |       |
|------------|--------------------|----------------------------------------------------------|-------|---------|-------|
| Galectin-1 | sp P11762 LEG1_RAT | A.DLTIKLPDGHEFKFPNRLNMEAINYM.A                           | 34.6  | 3105.54 | 6.9   |
| Galectin-1 | sp P11762 LEG1_RAT | A.DLTIKLPDGHEFKFPNRLNMEAINYMA.A                          | 28.83 | 3176.58 | -1.5  |
| Galectin-1 | sp P11762 LEG1_RAT | A.SNLNLKPGECKV.R                                         | 23.57 | 1413.76 | -0.1  |
| Galectin-1 | sp P11762 LEG1_RAT | A.SNLNLKPGECKVKGELAPDAKSFVL.N                            | 17.44 | 2797.52 | 0     |
| Galectin-1 | sp P11762 LEG1_RAT | C.NSKDDGTWGTEQRETAFFPQPGSITEV.C                          | 30.11 | 2996.38 | -0.4  |
| Galectin-1 | sp P11762 LEG1_RAT | E.LAPDAKSFVL.N                                           | 34.23 | 1059.6  | -1.1  |
| Galectin-1 | sp P11762 LEG1_RAT | E.LAPDAKSFVLNL.G                                         | 21.91 | 1286.72 | 0.5   |
| Galectin-1 | sp P11762 LEG1_RAT | F.DQADLTIKLPDGHEF.K                                      | 32.11 | 1697.83 | -0.8  |
| Galectin-1 | sp P11762 LEG1_RAT | F.DQADLTIKLPDGHEFKFPNRL.N                                | 32.83 | 2453.27 | 1.7   |
| Galectin-1 | sp P11762 LEG1_RAT | F.KFPNRLNMEAIN.Y                                         | 15.2  | 1445.74 | 1     |
| Galectin-1 | sp P11762 LEG1_RAT | F.KFPNRLNMEAINYM.A                                       | 27.42 | 1739.85 | -10.5 |
| Galectin-1 | sp P11762 LEG1_RAT | F.PNRLNMEAINYM.A                                         | 15.76 | 1464.69 | 0.1   |
| Galectin-1 | sp P11762 LEG1_RAT | L.APDAKSFVL.N                                            | 33.45 | 946.512 | -0.3  |
| Galectin-1 | sp P11762 LEG1_RAT | L.APDAKSFVLNL.G                                          | 38.82 | 1173.64 | -0.7  |
| Galectin-1 | sp P11762 LEG1_RAT | L.HFNPRFN.A                                              | 20.18 | 930.446 | -0.1  |
| Galectin-1 | sp P11762 LEG1_RAT | L.HFNPRFNAH.G                                            | 39.43 | 1138.54 | -0.7  |
| Galectin-1 | sp P11762 LEG1_RAT | L.KVRGELAPDAKSFVL.N                                      | 31.48 | 1628.92 | -1.1  |
| Galectin-1 | sp P11762 LEG1_RAT | L.KVRGELAPDAKSFVLNL.G                                    | 36.35 | 1856.05 | -1.3  |
| Galectin-1 | sp P11762 LEG1_RAT | L.KVRGELAPDAKSFVLNLGKDSNNL.C                             | 22.79 | 2584.4  | -8.5  |
| Galectin-1 | sp P11762 LEG1_RAT | L.NLGKDSNNLC(-1.01)LHFNPRFNAHGDANTIVC(-1.01).N           | 15.84 | 3081.43 | -2.5  |
| Galectin-1 | sp P11762 LEG1_RAT | L.NLKPGECKV.R                                            | 19.35 | 1099.61 | -0.7  |
| Galectin-1 | sp P11762 LEG1_RAT | L.NLKPGECKVKGELAPDAKSFVLNL.G                             | 16.97 | 2710.48 | -1.4  |
| Galectin-1 | sp P11762 LEG1_RAT | L.PDGHEFKFPNRL.N                                         | 34.31 | 1455.73 | -1    |
| Galectin-1 | sp P11762 LEG1_RAT | L.PDGHEFKFPNRLNMEAINYM.A                                 | 16.83 | 2422.12 | -3.5  |
| Galectin-1 | sp P11762 LEG1_RAT | M.A(+42.01)C(-1.01)GLVASNLNLKPGECKV.LKVRGELAPDAKSF.V     | 15.27 | 3139.62 | 0.7   |
| Galectin-1 | sp P11762 LEG1_RAT | M.A(+42.01)C(-1.01)GLVASNLNLKPGECKV.LKVRGELAPDAKSFVL.N   | 32.82 | 3351.77 | -1.5  |
| Galectin-1 | sp P11762 LEG1_RAT | M.A(+42.01)C(-1.01)GLVASNLNLKPGECKV.LKVRGELAPDAKSFVLNL.G | 18.97 | 3578.9  | -0.4  |
| Galectin-1 | sp P11762 LEG1_RAT | M.A(+42.01)CGLVASNLNLKPGECKV.RGE.L                       | 23.17 | 2312.2  | 0.1   |
| Galectin-1 | sp P11762 LEG1_RAT | M.A(+42.01)CGLVASNLNLKPGECKV.RGELAPDAKSFVLNL.G           | 36.71 | 3580.91 | -0.9  |
| Galectin-1 | sp P11762 LEG1_RAT | N.SKDDGTWGTEQRETAFFPQPGSITEV.C                           | 17.81 | 2882.34 | 0.3   |
| Galectin-1 | sp P11762 LEG1_RAT | R.GELAPDAKSFVLNL.G                                       | 15.52 | 1472.79 | -0.7  |
| Galectin-1 | sp P11762 LEG1_RAT | V.RGELAPDAKSF.V                                          | 17.68 | 1189.61 | -1.5  |

|                 |                      |                                                                  |       |         |       |
|-----------------|----------------------|------------------------------------------------------------------|-------|---------|-------|
| Galectin-1      | sp P11762 LEG1_RAT   | V.RGELAPDAKSFV.L                                                 | 29.28 | 1288.68 | -0.1  |
| Galectin-1      | sp P11762 LEG1_RAT   | V.RGELAPDAKSFVL.N                                                | 34.92 | 1401.76 | -1.9  |
| Galectin-1      | sp P11762 LEG1_RAT   | V.RGELAPDAKSFVLN.L                                               | 36.58 | 1515.8  | 0.3   |
| Galectin-1      | sp P11762 LEG1_RAT   | V.RGELAPDAKSFVLNL.G                                              | 32.69 | 1628.89 | -1.1  |
| Galectin-1      | sp P11762 LEG1_RAT   | V.RGELAPDAKSFVLNLGKDSN<br>NL.C                                   | 46.84 | 2357.23 | -0.9  |
| Galectin-1      | sp P11762 LEG1_RAT   | M.A(+42.01)CGLVASNLNLKPG<br>ECLK.V                               | 23.41 | 1870.96 | 1.5   |
| Galectin-1      | sp P11762 LEG1_RAT   | M.A(+42.01)CGLVASNLNLKPG<br>ECLKV.R                              | 27.99 | 1970.03 | -0.6  |
| Gamma-enolase   | sp P07323 ENOG_RAT   | M.S(+42.01)IQKIWAR.E                                             | 23.69 | 1042.59 | -1.2  |
| Gamma-synuclein | tr F1LQ96 F1LQ96_RAT | G.VVRKEDLEPPAQDQEAKEQ<br>EEGEEAKSGGD                             | 50.71 | 3296.53 | -1.1  |
| Gamma-synuclein | tr F1LQ96 F1LQ96_RAT | M(+42.01)(+15.99)DVFKKGFSIA<br>R.E                               | 37.4  | 1455.75 | 0.6   |
| Gamma-synuclein | tr F1LQ96 F1LQ96_RAT | M(+42.01)DVFKK.G                                                 | 33.99 | 808.415 | -0.5  |
| Gamma-synuclein | tr F1LQ96 F1LQ96_RAT | M(+42.01)DVFKKG.F                                                | 30.41 | 865.437 | -0.5  |
| Gamma-synuclein | tr F1LQ96 F1LQ96_RAT | M(+42.01)DVFKKGF.S                                               | 37.87 | 1012.51 | -0.9  |
| Gamma-synuclein | tr F1LQ96 F1LQ96_RAT | M(+42.01)DVFKKGF.S.I                                             | 35.51 | 1099.54 | -0.6  |
| Gamma-synuclein | tr F1LQ96 F1LQ96_RAT | M(+42.01)DVFKKGF.S.I.A                                           | 39.86 | 1212.62 | -1.5  |
| Gamma-synuclein | tr F1LQ96 F1LQ96_RAT | M(+42.01)DVFKKGF.S.I.A.R                                         | 39.96 | 1283.66 | -0.9  |
| Gamma-synuclein | tr F1LQ96 F1LQ96_RAT | M(+42.01)DVFKKGF.S.I.A.R.E                                       | 43.61 | 1439.76 | -0.2  |
| Gamma-synuclein | tr F1LQ96 F1LQ96_RAT | M(+42.01)DVFKKGF.S.I.A.R.E.GVV<br>G.A                            | 26.38 | 1880.98 | -0.4  |
| Gamma-synuclein | tr F1LQ96 F1LQ96_RAT | M(+42.01)DVFKKGF.S.I.A.R.E.GVV<br>G.A.V                          | 31.79 | 1952.02 | 0.4   |
| Gamma-synuclein | tr F1LQ96 F1LQ96_RAT | M(+42.01)DVFKKGF.S.I.A.R.E.GVV<br>G.AVEK.T                       | 64.02 | 2308.22 | 0     |
| Gamma-synuclein | tr F1LQ96 F1LQ96_RAT | M(+42.01)DVFKKGF.S.I.A.R.E.GVV<br>G.AVEKTKQGVTE(-.98).A          | 36.78 | 3050.62 | -10.3 |
| Gamma-synuclein | tr F1LQ96 F1LQ96_RAT | M(+42.01)DVFKKGF.S.I.A.R.E.GVV<br>G.AVEKTKQGVTE.A                | 41.45 | 3051.61 | 0.1   |
| Gamma-synuclein | tr F1LQ96 F1LQ96_RAT | M(+42.01)DVFKKGF.S.I.A.R.E.GVV<br>G.AVEKTKQGVTEA(-.98).A         | 16.08 | 3121.66 | -6.1  |
| Gamma-synuclein | tr F1LQ96 F1LQ96_RAT | M(+42.01)DVFKKGF.S.I.A.R.E.GVV<br>G.AVEKTKQGVTEA.A               | 46.78 | 3122.64 | -1.2  |
| Gamma-synuclein | tr F1LQ96 F1LQ96_RAT | M(+42.01)DVFKKGF.S.I.A.R.E.GVV<br>G.AVEKTKQGVTEAAEKTKEG<br>V.M   | 19.57 | 3965.09 | 0.3   |
| Gamma-synuclein | tr F1LQ96 F1LQ96_RAT | M(+42.01)DVFKKGF.S.I.A.R.E.GVV<br>G.AVEKTKQGVTEAAEKTKEG<br>VM.Y  | 39.21 | 4096.13 | -5.7  |
| Gamma-synuclein | tr F1LQ96 F1LQ96_RAT | M(+42.01)DVFKKGF.S.I.A.R.E.GVV<br>G.AVEKTKQGVTEAAEKTKEG<br>VMY.V | 53.02 | 4259.2  | 0.1   |
| Gamma-synuclein | tr F1LQ96 F1LQ96_RAT | M.DVFKKGF.S.I.A.R.E                                              | 15.77 | 1266.71 | -1.9  |
| Gamma-synuclein | tr F1LQ96 F1LQ96_RAT | N.TVATKTVEEAENIVTTGGV<br>RKEDLEPPAQDQEAKEQEEGE<br>EAKSGGD        | 23.55 | 5139.49 | 0.7   |
| Gamma-synuclein | tr F1LQ96 F1LQ96_RAT | S.SVNTVATKTVEEAENIVTT<br>GVVRKEDLEPPAQDQEAKEQE<br>EGEEAKSGGD     | 35.55 | 5439.63 | 0.3   |

|                                                                     |                          |                                                           |       |         |      |
|---------------------------------------------------------------------|--------------------------|-----------------------------------------------------------|-------|---------|------|
| Gamma-synuclein                                                     | tr F1LQ96 F1LQ96_RAT     | T.KTVEEAENIVVTTGVVRKED<br>LEPPAQDQEAKEQEEGEEAKS<br>GGD    | 17.15 | 4767.28 | -2.5 |
| Gamma-synuclein                                                     | tr F1LQ96 F1LQ96_RAT     | T.TGVVRKEDLEPPAQDQEAKE<br>QEEGEEAKSGGD                    | 32.06 | 3454.6  | 0.7  |
| Gamma-synuclein                                                     | tr F1LQ96 F1LQ96_RAT     | T.VATKTVEEAENIVVTTGVVR<br>KEDLEPPAQDQEAKEQEEGEE<br>AKSGGD | 39.03 | 5038.44 | 3.8  |
| Gamma-synuclein                                                     | tr F1LQ96 F1LQ96_RAT     | V.TTGVVRKEDLEPPAQDQEA<br>KEQEEGEEAKSGGD                   | 33.58 | 3555.64 | -0.3 |
| Gamma-synuclein                                                     | sp Q63544 SYUG_RAT       | A.REGVVGAVEKTKQGVTEAA<br>EKTKEGV.M                        | 24.67 | 2699.45 | -0.5 |
| Gamma-synuclein                                                     | sp Q63544 SYUG_RAT       | N.TVATKTVEEAENIVVTTGVV<br>R.K                             | 19.97 | 2215.21 | 2.6  |
| Glia maturation factor<br>beta                                      | sp Q63228 GMFB_RAT       | I.RNTEDLTEEWLREKLGFFH                                     | 49.28 | 2419.19 | -0.9 |
| Glial fibrillary acidic<br>protein beta                             | tr A1E251 A1E251_RAT     | S.SETMVRGHGHPTRHLG.T                                      | 27.7  | 1633.81 | -1.1 |
| Glial fibrillary acidic<br>protein beta                             | tr A1E251 A1E251_RAT     | Y.ASSETMVRGHGHPTRHLG.T                                    | 36.67 | 1791.88 | -0.8 |
| Glyceraldehyde-3-<br>phosphate<br>dehydrogenase                     | tr D3ZKR3 D3ZKR3_RA<br>T | A.STGAAKAVGKVIPELNGKLT<br>GMA.F                           | 18.08 | 2212.22 | -0.4 |
| Glyceraldehyde-3-<br>phosphate<br>dehydrogenase                     | tr D3ZKR3 D3ZKR3_RA<br>T | M.AFRVPTPNVSVVDL.T                                        | 29.52 | 1512.83 | -3.3 |
| Glyceraldehyde-3-<br>phosphate<br>dehydrogenase testis-<br>specific | sp Q9ESV6 G3PT_RAT       | F.RVPTPNVSVVDL.T                                          | 17.04 | 1294.72 | 0.1  |
| Glyceraldehyde-3-<br>phosphate<br>dehydrogenase testis-<br>specific | sp Q9ESV6 G3PT_RAT       | S.STGAAKAVGKVIPELNGKLT<br>GMA.F                           | 18.08 | 2212.22 | -0.4 |
| Guanine nucleotide-<br>binding protein subunit<br>beta-4            | tr D4A752 D4A752_RAT     | M.S(+42.01)ELEQLRQEAQLR.<br>N                             | 21.36 | 1769.89 | 1.1  |
| H2-K region expressed<br>gene 2 rat orthologue                      | tr Q6MGC4 Q6MGC4_R<br>AT | M.A(+42.01)ELIQKKLQGEVEK.<br>Y                            | 30.82 | 1653.93 | 0.1  |
| H2-K region expressed<br>gene 2 rat orthologue                      | tr Q6MGC4 Q6MGC4_R<br>AT | M.A(+42.01)ELIQKKLQGEVEK<br>Y.Q                           | 25.87 | 1816.99 | -0.3 |
| H2-K region expressed<br>gene 2 rat orthologue                      | tr Q6MGC4 Q6MGC4_R<br>AT | M.A(+42.01)ELIQKKLQGEVEK<br>YQQL.Q                        | 36.14 | 2186.19 | -0.7 |
| Heat shock 27kDa<br>protein 1                                       | tr G3V913 G3V913_RAT     | A.APAFSRAL.N                                              | 37.34 | 831.46  | -0.1 |
| Heat shock 27kDa<br>protein 1                                       | tr G3V913 G3V913_RAT     | A.APAFSRALNR.Q                                            | 36.6  | 1101.6  | -0.6 |
| Heat shock 27kDa<br>protein 1                                       | tr G3V913 G3V913_RAT     | A.APAFSRALNRQL.S                                          | 15.58 | 1342.75 | -2.6 |
| Heat shock 27kDa<br>protein 1                                       | tr G3V913 G3V913_RAT     | A.FGVPRFPDEW.S                                            | 28.65 | 1248.59 | 1    |
| Heat shock 27kDa<br>protein 1                                       | tr G3V913 G3V913_RAT     | A.FGVPRFPDEWSQW(-.98).F                                   | 20.97 | 1648.78 | -1.3 |
| Heat shock 27kDa<br>protein 1                                       | tr G3V913 G3V913_RAT     | A.FGVPRFPDEWSQW.F                                         | 37.31 | 1649.76 | -1.6 |
| Heat shock 27kDa<br>protein 1                                       | tr G3V913 G3V913_RAT     | A.FGVPRFPDEWSQWF.S                                        | 50.27 | 1796.83 | -2.3 |
| Heat shock 27kDa<br>protein 1                                       | tr G3V913 G3V913_RAT     | A.FGVPRFPDEWSQWFS.S                                       | 49.58 | 1883.86 | -1.1 |
| Heat shock 27kDa<br>protein 1                                       | tr G3V913 G3V913_RAT     | A.FGVPRFPDEWSQWFSS.A                                      | 36.75 | 1970.9  | 4.1  |

|                            |                      |                                                   |       |         |      |
|----------------------------|----------------------|---------------------------------------------------|-------|---------|------|
| Heat shock 27kDa protein 1 | tr G3V913 G3V913_RAT | A.FGVPRFPDEWSQWFSSA.G                             | 40.49 | 2041.93 | -8.4 |
| Heat shock 27kDa protein 1 | tr G3V913 G3V913_RAT | A.FGVPRFPDEWSQWFSSAGWPGYVRPLPAATAEGPAAV.T         | 16.46 | 4002.95 | 8.8  |
| Heat shock 27kDa protein 1 | tr G3V913 G3V913_RAT | A.FGVPRFPDEWSQWFSSAGWPGYVRPLPAATAEGPAAVTL.A       | 33.8  | 4217.08 | -4.7 |
| Heat shock 27kDa protein 1 | tr G3V913 G3V913_RAT | A.GWPGYVRPLPAATAEGPAAVTL.A                        | 44.55 | 2193.16 | -2.7 |
| Heat shock 27kDa protein 1 | tr G3V913 G3V913_RAT | F.DQAFGVPRFPDEWSQWF.S                             | 35.17 | 2110.95 | 2.4  |
| Heat shock 27kDa protein 1 | tr G3V913 G3V913_RAT | F.GVPRFPDEW.S                                     | 18.16 | 1101.52 | -0.1 |
| Heat shock 27kDa protein 1 | tr G3V913 G3V913_RAT | F.GVPRFPDEWSQW.F                                  | 32.96 | 1502.69 | -0.7 |
| Heat shock 27kDa protein 1 | tr G3V913 G3V913_RAT | F.GVPRFPDEWSQWFS.S                                | 25.49 | 1736.79 | -1.7 |
| Heat shock 27kDa protein 1 | tr G3V913 G3V913_RAT | F.GVPRFPDEWSQWFSSA.G                              | 28.58 | 1894.86 | 0.4  |
| Heat shock 27kDa protein 1 | tr G3V913 G3V913_RAT | F.SSAGWPGYVRPLPAATAEGPAAV.T                       | 16.31 | 2224.13 | -3.1 |
| Heat shock 27kDa protein 1 | tr G3V913 G3V913_RAT | F.SSAGWPGYVRPLPAATAEGPAAVTL.A                     | 65.73 | 2438.26 | -0.2 |
| Heat shock 27kDa protein 1 | tr G3V913 G3V913_RAT | L.AAPAFSRALNRQL.S                                 | 20.83 | 1413.78 | -1.2 |
| Heat shock 27kDa protein 1 | tr G3V913 G3V913_RAT | L.AAPAFSRALNRQLSSGVSEIRQTADRW.R                   | 32    | 2986.55 | 1.5  |
| Heat shock 27kDa protein 1 | tr G3V913 G3V913_RAT | L.AAPAFSRALNRQLSSGVSEIRQTADRWRVSL.D               | 15.59 | 3441.83 | -1.7 |
| Heat shock 27kDa protein 1 | tr G3V913 G3V913_RAT | L.DVNHFAPEELTVKT.K                                | 22.43 | 1598.79 | -7.2 |
| Heat shock 27kDa protein 1 | tr G3V913 G3V913_RAT | L.FDQAFGVPRFPDEWSQWF.S                            | 17.64 | 2258.02 | 5.3  |
| Heat shock 27kDa protein 1 | tr G3V913 G3V913_RAT | L.FDQAFGVPRFPDEWSQWFS.S                           | 24.97 | 2345.05 | -4   |
| Heat shock 27kDa protein 1 | tr G3V913 G3V913_RAT | L.NRQLSSGVSEIRQTADRWRVSL.D                        | 19.86 | 2557.35 | -0.8 |
| Heat shock 27kDa protein 1 | tr G3V913 G3V913_RAT | L.RSPSWEPFRDWYPAHSRL.F                            | 33.04 | 2286.11 | 0.3  |
| Heat shock 27kDa protein 1 | tr G3V913 G3V913_RAT | L.RSPSWEPFRDWYPAHSRLFDQA.F                        | 26.3  | 2747.3  | 8.7  |
| Heat shock 27kDa protein 1 | tr G3V913 G3V913_RAT | M.T(+42.01)ERRVPF.S                               | 27.56 | 945.503 | -0.2 |
| Heat shock 27kDa protein 1 | tr G3V913 G3V913_RAT | M.T(+42.01)ERRVPF.S.L                             | 29.85 | 1032.54 | -0.6 |
| Heat shock 27kDa protein 1 | tr G3V913 G3V913_RAT | M.T(+42.01)ERRVPFSL.L                             | 25.52 | 1145.62 | -0.4 |
| Heat shock 27kDa protein 1 | tr G3V913 G3V913_RAT | M.T(+42.01)ERRVPFSL.L.R                           | 22.25 | 1258.7  | 0.1  |
| Heat shock 27kDa protein 1 | tr G3V913 G3V913_RAT | M.T(+42.01)ERRVPFSL.L.R.S                         | 38.36 | 1414.8  | 1.4  |
| Heat shock 27kDa protein 1 | tr G3V913 G3V913_RAT | M.T(+42.01)ERRVPFSL.L.R.S.P                       | 38    | 1501.84 | -1.3 |
| Heat shock 27kDa protein 1 | tr G3V913 G3V913_RAT | M.T(+42.01)ERRVPFSL.L.R.S.PWEPFRDWYPAHS.R         | 27.9  | 3257.62 | 0.9  |
| Heat shock 27kDa protein 1 | tr G3V913 G3V913_RAT | M.T(+42.01)ERRVPFSL.L.R.S.PWEPFRDWYPAHS.R.L       | 26.6  | 3413.72 | 0    |
| Heat shock 27kDa protein 1 | tr G3V913 G3V913_RAT | M.T(+42.01)ERRVPFSL.L.R.S.PWEPFRDWYPAHSRL(-.98).F | 20.19 | 3525.82 | -5.2 |
| Heat shock 27kDa protein 1 | tr G3V913 G3V913_RAT | M.T(+42.01)ERRVPFSL.L.R.S.PWEPFRDWYPAHSRL.F       | 34.93 | 3526.8  | -0.6 |

|                                                        |                      |                                                                  |       |         |       |
|--------------------------------------------------------|----------------------|------------------------------------------------------------------|-------|---------|-------|
| Heat shock 27kDa protein 1                             | tr G3V913 G3V913_RAT | M.T(+42.01)ERRVPFSLLRSPSW<br>EPFRDWYPAHSRLFD.Q                   | 24.07 | 3788.9  | -1    |
| Heat shock 27kDa protein 1                             | tr G3V913 G3V913_RAT | R.QLSSGVSEIRQTADRWRVSL.<br>D                                     | 30.93 | 2287.2  | 0.2   |
| Heat shock 27kDa protein 1                             | tr G3V913 G3V913_RAT | S.AGWPGYVRPLPAAT.A                                               | 16.29 | 1454.77 | -1.8  |
| Heat shock 27kDa protein 1                             | tr G3V913 G3V913_RAT | S.AGWPGYVRPLPAATAEGPA<br>AVTL.A                                  | 41.3  | 2264.2  | 1     |
| Heat shock 27kDa protein 1                             | tr G3V913 G3V913_RAT | S.PSWEPFRDWYPAHS.R                                               | 28.77 | 1773.79 | -0.6  |
| Heat shock 27kDa protein 1                             | tr G3V913 G3V913_RAT | S.PSWEPFRDWYPAHSRLFDQA<br>.F                                     | 20.94 | 2504.17 | 1.4   |
| Heat shock 27kDa protein 1                             | tr G3V913 G3V913_RAT | S.SAGWPGYVRPLPAATAEGPA<br>AVTL.A                                 | 50.35 | 2351.23 | -10.5 |
| Heat shock 27kDa protein 1                             | tr G3V913 G3V913_RAT | V.PFSLLR.S.P                                                     | 24.07 | 818.465 | 0.4   |
| Heat shock 27kDa protein 1                             | tr G3V913 G3V913_RAT | V.PFSLLRSPSWEPFRDWYPAH<br>S.R                                    | 21.96 | 2574.24 | -4.3  |
| Heat shock 27kDa protein 1                             | tr G3V913 G3V913_RAT | V.PFSLLRSPSWEPFRDWYPAH<br>SRLFDQA.F                              | 23.65 | 3304.62 | 0.8   |
| Heat shock 27kDa protein 1                             | tr G3V913 G3V913_RAT | V.PRFPDEWSQWF.S                                                  | 18.26 | 1493.67 | -2.7  |
| Heat shock 27kDa protein 1                             | tr G3V913 G3V913_RAT | W.FSSAGWPGYVRPLPAATAE<br>GPAAVTL.A                               | 43.39 | 2585.33 | -0.7  |
| Heat shock 27kDa protein 1                             | tr G3V913 G3V913_RAT | W.SQWFSSAGWPGYVRPLPAA<br>TAEGPAAVTL.A                            | 31.33 | 2986.5  | -3.2  |
| Heat shock 27kDa protein 1                             | tr G3V913 G3V913_RAT | L.AAPAFSRAL.N                                                    | 33.63 | 902.497 | 0.2   |
| Heat shock 27kDa protein 1                             | tr G3V913 G3V913_RAT | L.AAPAFSRALNR.Q                                                  | 27.71 | 1172.64 | -1.4  |
| Heat shock 70kDa protein 12A (Predicted) isoform CRA_a | tr D3ZC55 D3ZC55_RAT | M.A(+42.01)DKEAGGGDAGPRE<br>TAP TSA.Y                            | 60.28 | 1898.86 | -1.6  |
| Heat shock 70kDa protein 12A (Predicted) isoform CRA_a | tr D3ZC55 D3ZC55_RAT | M.A(+42.01)DKEAGGGDAGPRE<br>TAP TSA.Y.S                          | 56.66 | 2061.92 | -3.6  |
| Hemoglobin alpha adult chain 2                         | tr B1H216 B1H216_RAT | A.ADHVEDLPGALSTL.S                                               | 20.45 | 1436.71 | -2.5  |
| Hemoglobin alpha adult chain 2                         | tr B1H216 B1H216_RAT | A.ADHVEDLPGALSTLSDLHAH<br>KL.R                                   | 34.33 | 2338.19 | 0     |
| Hemoglobin alpha adult chain 2                         | tr B1H216 B1H216_RAT | A.ADHVEDLPGALSTLSDLHAH<br>KLRVDPV.N                              | 36.45 | 2904.51 | -0.2  |
| Hemoglobin alpha adult chain 2                         | tr B1H216 B1H216_RAT | A.ADHVEDLPGALSTLSDLHAH<br>KLRVDPV.N.F                            | 28.85 | 3018.55 | -0.8  |
| Hemoglobin alpha adult chain 2                         | tr B1H216 B1H216_RAT | A.C(+42.01)(-<br>1.01)HHPGDFTPAM(+15.99)HA<br>SLDKFLASVSTVLTSKYR | 15.34 | 3472.68 | 4.8   |
| Hemoglobin alpha adult chain 2                         | tr B1H216 B1H216_RAT | A.HGKKVADALAKA.A                                                 | 34.58 | 1207.7  | 1.6   |
| Hemoglobin alpha adult chain 2                         | tr B1H216 B1H216_RAT | A.MHASLSDKFLASVSTVLTSKY<br>R                                     | 48.83 | 2353.25 | 0.2   |
| Hemoglobin alpha adult chain 2                         | tr B1H216 B1H216_RAT | A.SLDKFLASV.S                                                    | 29.45 | 978.539 | -0.3  |
| Hemoglobin alpha adult chain 2                         | tr B1H216 B1H216_RAT | A.SLDKFLASVSTVL.T                                                | 22.85 | 1378.77 | -2.6  |
| Hemoglobin alpha adult chain 2                         | tr B1H216 B1H216_RAT | A.SLDKFLASVSTVLTSKYR                                             | 59.45 | 2014.11 | -2.1  |
| Hemoglobin alpha adult chain 2                         | tr B1H216 B1H216_RAT | A.SVSTVLTSKYR                                                    | 37.49 | 1239.68 | 0     |
| Hemoglobin alpha adult chain 2                         | tr B1H216 B1H216_RAT | C.HHPGDFTPAMHASLSDKFLAS<br>VSTVLTSKYR                            | 50.61 | 3312.67 | -3.7  |

|                                |                      |                                                              |       |         |      |
|--------------------------------|----------------------|--------------------------------------------------------------|-------|---------|------|
| Hemoglobin alpha adult chain 2 | tr B1H216 B1H216_RAT | D.FTPAMHASLDKFLASVSTVL TSKYR                                 | 37.06 | 2769.45 | 2.5  |
| Hemoglobin alpha adult chain 2 | tr B1H216 B1H216_RAT | D.PVNFKFLSHCLLVTLACHHP GDFTPAMHASLDKFLASVSTV LTSKYR          | 22.78 | 5198.67 | -2.7 |
| Hemoglobin alpha adult chain 2 | tr B1H216 B1H216_RAT | F.AAFPTTKTY.F                                                | 42.01 | 998.507 | -0.3 |
| Hemoglobin alpha adult chain 2 | tr B1H216 B1H216_RAT | F.LASVSTVLTTSKYR                                             | 32.45 | 1423.8  | -0.3 |
| Hemoglobin alpha adult chain 2 | tr B1H216 B1H216_RAT | F.PTTKYFVSHIDVSPGSAQVKA HGKKV.A                              | 30.71 | 2782.48 | -1.6 |
| Hemoglobin alpha adult chain 2 | tr B1H216 B1H216_RAT | F.SHIDVSPGSAQVKAHGKK.V                                       | 31.2  | 1844.99 | 0    |
| Hemoglobin alpha adult chain 2 | tr B1H216 B1H216_RAT | F.SHIDVSPGSAQVKAHGKKV. A                                     | 38.48 | 1944.05 | -0.3 |
| Hemoglobin alpha adult chain 2 | tr B1H216 B1H216_RAT | F.SHIDVSPGSAQVKAHGKKVA DA.L                                  | 35.97 | 2201.16 | -0.2 |
| Hemoglobin alpha adult chain 2 | tr B1H216 B1H216_RAT | F.SHIDVSPGSAQVKAHGKKVA DAL.A                                 | 23.78 | 2314.24 | -0.5 |
| Hemoglobin alpha adult chain 2 | tr B1H216 B1H216_RAT | F.SHIDVSPGSAQVKAHGKKVA DALAK.A                               | 38.67 | 2513.37 | -1.4 |
| Hemoglobin alpha adult chain 2 | tr B1H216 B1H216_RAT | F.SHIDVSPGSAQVKAHGKKVA DALAKA.A                              | 16.18 | 2584.41 | -0.4 |
| Hemoglobin alpha adult chain 2 | tr B1H216 B1H216_RAT | F.T(+42.01)(+79.97)PAM(+15.99) HASLDK(+42.01)FLASVSTVLT SKYR | 31.84 | 2802.37 | 2.9  |
| Hemoglobin alpha adult chain 2 | tr B1H216 B1H216_RAT | F.TPAMHASLDKFLASVSTVLT SKYR                                  | 58.07 | 2622.38 | 0.1  |
| Hemoglobin alpha adult chain 2 | tr B1H216 B1H216_RAT | G.DFTPAMHASLDKFLASVSTV LTSKYR                                | 24.97 | 2884.48 | -0.4 |
| Hemoglobin alpha adult chain 2 | tr B1H216 B1H216_RAT | H.ASLDKFLASVSTVL.T                                           | 28.46 | 1449.81 | -4.1 |
| Hemoglobin alpha adult chain 2 | tr B1H216 B1H216_RAT | H.ASLDKFLASVSTVLTTSKYR                                       | 61.66 | 2085.15 | -1.1 |
| Hemoglobin alpha adult chain 2 | tr B1H216 B1H216_RAT | H.HPGDFTPAMHASLDK.F                                          | 36.47 | 1622.75 | -0.4 |
| Hemoglobin alpha adult chain 2 | tr B1H216 B1H216_RAT | H.HPGDFTPAMHASLDKFLASV STVLTTSKYR                            | 56.51 | 3175.61 | -0.3 |
| Hemoglobin alpha adult chain 2 | tr B1H216 B1H216_RAT | H.PGDFTPAMHASLDKFLASVS TVL.T                                 | 16.3  | 2403.21 | 0.8  |
| Hemoglobin alpha adult chain 2 | tr B1H216 B1H216_RAT | H.PGDFTPAMHASLDKFLASVS TVLTTSKYR                             | 51.07 | 3038.55 | -0.9 |
| Hemoglobin alpha adult chain 2 | tr B1H216 B1H216_RAT | L.ACHHPGDFTPAMHASLDK.F                                       | 41.59 | 1933.86 | -0.3 |
| Hemoglobin alpha adult chain 2 | tr B1H216 B1H216_RAT | L.AKAADHVEDLPGALSTL.S                                        | 27.94 | 1706.88 | -1.4 |
| Hemoglobin alpha adult chain 2 | tr B1H216 B1H216_RAT | L.AKAADHVEDLPGALSTLSDL HAH.K                                 | 23.91 | 2367.18 | 0.4  |
| Hemoglobin alpha adult chain 2 | tr B1H216 B1H216_RAT | L.AKAADHVEDLPGALSTLSDL HAHKL.R                               | 15.1  | 2608.36 | 0.2  |
| Hemoglobin alpha adult chain 2 | tr B1H216 B1H216_RAT | L.ASVSTVLTTSKYR                                              | 40.83 | 1310.72 | 0.3  |
| Hemoglobin alpha adult chain 2 | tr B1H216 B1H216_RAT | L.QRMFAAFPTTKTY.F                                            | 20.76 | 1560.78 | -0.8 |
| Hemoglobin alpha adult chain 2 | tr B1H216 B1H216_RAT | L.RVDPVNFKFL.S                                               | 29.31 | 1233.69 | -0.3 |
| Hemoglobin alpha adult chain 2 | tr B1H216 B1H216_RAT | L.RVDPVNFKFLSH.C                                             | 34.57 | 1457.78 | -0.4 |
| Hemoglobin alpha adult chain 2 | tr B1H216 B1H216_RAT | L.RVDPVNFKFLSHCLL                                            | 37.68 | 1673.87 | 0    |



|                                |                      |                                                         |       |         |      |
|--------------------------------|----------------------|---------------------------------------------------------|-------|---------|------|
| Hemoglobin alpha adult chain 2 | tr B1H216 B1H216_RAT | L.RVDPVNFKFLSHCLLV.T                                    | 23.04 | 1886.02 | -0.8 |
| Hemoglobin alpha adult chain 2 | tr B1H216 B1H216_RAT | L.RVDPVNFKFLSHCLLVTL.A                                  | 16.52 | 2100.16 | 0.2  |
| Hemoglobin alpha adult chain 2 | tr B1H216 B1H216_RAT | L.SDLHAHKL RVDPV.N                                      | 35.96 | 1485.81 | -0.4 |
| Hemoglobin alpha adult chain 2 | tr B1H216 B1H216_RAT | L.SDLHAHKL RVDPV.N.F                                    | 40.56 | 1599.85 | -0.2 |
| Hemoglobin alpha adult chain 2 | tr B1H216 B1H216_RAT | L.SDLHAHKL RVDPVNFKFLSH.C                               | 33    | 2359.25 | -0.7 |
| Hemoglobin alpha adult chain 2 | tr B1H216 B1H216_RAT | L.VTLAC(-1.01)HHPGDFTPAMHASL DKFLASVSTVLT SKYR          | 29.88 | 3798.91 | -2.5 |
| Hemoglobin alpha adult chain 2 | tr B1H216 B1H216_RAT | L.VTLACHHPGDFTPAMHASL DKFLASVSTVLT SKYR                 | 34.22 | 3799.92 | 3.2  |
| Hemoglobin alpha adult chain 2 | tr B1H216 B1H216_RAT | M.FAAFPTTKT.Y                                           | 19.55 | 982.512 | 0.8  |
| Hemoglobin alpha adult chain 2 | tr B1H216 B1H216_RAT | M.FAAFPTTKTYF.S                                         | 26.31 | 1292.64 | 2    |
| Hemoglobin alpha adult chain 2 | tr B1H216 B1H216_RAT | M.HASL DKFLASVSTVLT SKYR                                | 40.49 | 2222.21 | 0    |
| Hemoglobin alpha adult chain 2 | tr B1H216 B1H216_RAT | M.VLSADDKTNI.K                                          | 29.87 | 1074.56 | -0.3 |
| Hemoglobin alpha adult chain 2 | tr B1H216 B1H216_RAT | M.VLSADDKTNIKN(-.98).C                                  | 32.57 | 1315.71 | -1.2 |
| Hemoglobin alpha adult chain 2 | tr B1H216 B1H216_RAT | M.VLSADDKTNIKNCWGKIGG HGGEYGEEAL.Q                      | 20.56 | 3060.46 | -0.3 |
| Hemoglobin alpha adult chain 2 | tr B1H216 B1H216_RAT | M.VLSADDKTNIKNCWGKIGG HGGEYGEEALQR.M                    | 30.67 | 3344.62 | -0.8 |
| Hemoglobin alpha adult chain 2 | tr B1H216 B1H216_RAT | M.VLSADDKTNIKNCWGKIGG HGGEYGEEALQRMF.A                  | 17.83 | 3622.73 | 0.7  |
| Hemoglobin alpha adult chain 2 | tr B1H216 B1H216_RAT | M.VLSADDKTNIKNCWGKIGG HGGEYGEEALQRMF AAFPPTTKTY.F       | 19.43 | 4603.23 | -2.8 |
| Hemoglobin alpha adult chain 2 | tr B1H216 B1H216_RAT | P.G(+42.01)DFTPAM(+15.99)HASL DK(+42.01)FLASVSTVLT SKYR | 23.55 | 3041.52 | 14.6 |
| Hemoglobin alpha adult chain 2 | tr B1H216 B1H216_RAT | P.GDFTPAMHASL DKFLASVSTVLT SKYR                         | 22.06 | 2941.5  | 3.4  |
| Hemoglobin alpha adult chain 2 | tr B1H216 B1H216_RAT | S.HIDVSPGSAQVKAHGKKV.A                                  | 32.46 | 1857.02 | -2.7 |
| Hemoglobin alpha adult chain 2 | tr B1H216 B1H216_RAT | S.LDKFLASVSTVLT SKYR                                    | 20.99 | 1927.08 | 0.1  |
| Hemoglobin alpha adult chain 2 | tr B1H216 B1H216_RAT | T.LAC(-1.01)HHPGDFTPAMHASL DKFLASVSTVLT SKYR            | 49.19 | 3598.79 | -4   |
| Hemoglobin alpha adult chain 2 | tr B1H216 B1H216_RAT | V.ADALAKAADHVEDLPGALS T.L                               | 41.86 | 1963.99 | 1.7  |
| Hemoglobin alpha adult chain 2 | tr B1H216 B1H216_RAT | V.ADALAKAADHVEDLPGALS T.LSDLHAH.K                       | 19.25 | 2737.37 | 1.4  |
| Hemoglobin alpha adult chain 2 | tr B1H216 B1H216_RAT | V.ADALAKAADHVEDLPGALS T.LSDLHAH.K.L                     | 31.27 | 2865.46 | -0.7 |
| Hemoglobin alpha adult chain 2 | tr B1H216 B1H216_RAT | V.ADALAKAADHVEDLPGALS T.LSDLHAHKL.R                     | 39.72 | 2978.55 | -0.7 |
| Hemoglobin alpha adult chain 2 | tr B1H216 B1H216_RAT | V.ADALAKAADHVEDLPGALS T.LSDLHAHKL RVDPV.N               | 29.31 | 3544.86 | -1   |
| Hemoglobin alpha adult chain 2 | tr B1H216 B1H216_RAT | V.ADALAKAADHVEDLPGALS T.LSDLHAHKL RVDPV.N.F             | 26.24 | 3658.91 | -1.6 |
| Hemoglobin alpha adult chain 2 | tr B1H216 B1H216_RAT | V.NFKFLSHC.L                                            | 22.38 | 994.47  | -0.1 |

|                                |                      |                                                                   |       |         |      |
|--------------------------------|----------------------|-------------------------------------------------------------------|-------|---------|------|
| Hemoglobin alpha adult chain 2 | tr B1H216 B1H216_RAT | Y.FSHIDVSPGSAQVKAHGKKV.A                                          | 26.93 | 2091.12 | -0.3 |
| Hemoglobin alpha adult chain 2 | tr B1H216 B1H216_RAT | F.AAFPTTKTYF.S                                                    | 23.04 | 1145.58 | 0.4  |
| Hemoglobin subunit alpha-1/2   | sp P01946 HBA_RAT    | D.KFLASVSTVLTSKYR                                                 | 34.84 | 1698.97 | -1.2 |
| Hemoglobin subunit alpha-1/2   | sp P01946 HBA_RAT    | D.PVNFKFL.S                                                       | 32.68 | 863.491 | 2.8  |
| Hemoglobin subunit alpha-1/2   | sp P01946 HBA_RAT    | D.PVNFKFLSHC(-1.01)LLVTLAC(-1.01)HHPGDFTPAMHASLKD KFLASVSTVLTSKYR | 23.15 | 5196.65 | -2.5 |
| Hemoglobin subunit alpha-1/2   | sp P01946 HBA_RAT    | F.SHIDVSPGSAQVKAH.G                                               | 30.96 | 1531.77 | 0.4  |
| Hemoglobin subunit alpha-1/2   | sp P01946 HBA_RAT    | F.SHIDVSPGSAQVKAHG.K                                              | 23.84 | 1588.8  | -0.5 |
| Hemoglobin subunit alpha-1/2   | sp P01946 HBA_RAT    | F.TPAM(+15.99)HASLKD KFLASVSTVLTSKYR                              | 43.72 | 2638.38 | -0.4 |
| Hemoglobin subunit alpha-1/2   | sp P01946 HBA_RAT    | G.DFTPAM(+15.99)HASLKD KFLASVSTVLTSKYR                            | 33.42 | 2900.47 | -1.8 |
| Hemoglobin subunit alpha-1/2   | sp P01946 HBA_RAT    | K.FLASVSTVLTSKYR                                                  | 32.18 | 1570.87 | -2   |
| Hemoglobin subunit alpha-1/2   | sp P01946 HBA_RAT    | L.DKFLASVSTVLTSKYR                                                | 39.59 | 1813.99 | -0.6 |
| Hemoglobin subunit alpha-1/2   | sp P01946 HBA_RAT    | L.SADDKTNIKN(-.98).C                                              | 24.89 | 1103.56 | -0.4 |
| Hemoglobin subunit alpha-1/2   | sp P01946 HBA_RAT    | L.SADDKTNIKN.C                                                    | 29.54 | 1104.54 | -0.8 |
| Hemoglobin subunit alpha-1/2   | sp P01946 HBA_RAT    | L.SHC(-1.01)LLVTLAC(-1.01)HHPGDFTPAMHASLKD KFLASVSTVLTSKYR        | 23.91 | 4351.17 | -2   |
| Hemoglobin subunit alpha-1/2   | sp P01946 HBA_RAT    | M.VLSADDKTNIK(+42.01)N(-.98).C                                    | 17.61 | 1357.72 | -1.4 |
| Hemoglobin subunit alpha-1/2   | sp P01946 HBA_RAT    | M.VLSADDKTNIK(+42.01)NCWG(-.98).K                                 | 22.3  | 1703.83 | 14   |
| Hemoglobin subunit alpha-1/2   | sp P01946 HBA_RAT    | M.VLSADDKTNIK.N                                                   | 33.57 | 1202.65 | -0.2 |
| Hemoglobin subunit alpha-1/2   | sp P01946 HBA_RAT    | M.VLSADDKTNIKN.C                                                  | 36.68 | 1316.69 | -0.6 |
| Hemoglobin subunit alpha-1/2   | sp P01946 HBA_RAT    | M.VLSADDKTNIKNCWGK(+42.01)IGG(-.98).H                             | 16.71 | 2059.05 | 10.3 |
| Hemoglobin subunit alpha-1/2   | sp P01946 HBA_RAT    | M.VLSADDKTNIKNCWGK(+42.01)IGGHG(-.98).G                           | 18.35 | 2253.13 | 9.8  |
| Hemoglobin subunit alpha-1/2   | sp P01946 HBA_RAT    | M.VLSADDKTNIKNCWGK(+42.01)IGGHGG(-.98).E                          | 28.7  | 2310.15 | 10   |
| Hemoglobin subunit alpha-1/2   | sp P01946 HBA_RAT    | S.TVLTSKYR                                                        | 29.69 | 966.55  | -0.3 |
| Hemoglobin subunit alpha-1/2   | sp P01946 HBA_RAT    | T.PAMHASLKD KFLASVSTVLTSKYR                                       | 31.63 | 2521.34 | -0.7 |
| Hemoglobin subunit alpha-1/2   | sp P01946 HBA_RAT    | T.VLTSKYR                                                         | 21.41 | 865.502 | 0.1  |
| Hemoglobin subunit alpha-1/2   | sp P01946 HBA_RAT    | V.LSADDKTNIK.N                                                    | 16.85 | 1103.58 | -1.4 |
| Hemoglobin subunit alpha-1/2   | sp P01946 HBA_RAT    | V.LSADDKTNIKN.C                                                   | 25.38 | 1217.63 | -0.2 |
| Hemoglobin subunit alpha-1/2   | sp P01946 HBA_RAT    | V.LTSKYR                                                          | 19.02 | 766.434 | -0.5 |
| Hemoglobin subunit alpha-1/2   | sp P01946 HBA_RAT    | V.STVLTSKYR                                                       | 31.44 | 1053.58 | -0.3 |
| Hemoglobin subunit beta-1      | sp P02091 HBB1_RAT   | A.AFQKVVAGVASALAHKYH                                              | 42.81 | 1896.04 | -1.2 |

|                           |                    |                                                    |       |         |      |
|---------------------------|--------------------|----------------------------------------------------|-------|---------|------|
| Hemoglobin subunit beta-1 | sp P02091 HBB1_RAT | A.AVNGLWGKVNPDVGGEA L.G                            | 28.08 | 1909.95 | 3.4  |
| Hemoglobin subunit beta-1 | sp P02091 HBB1_RAT | A.FQKVVAGVASALAHKYH                                | 35.81 | 1825    | -0.9 |
| Hemoglobin subunit beta-1 | sp P02091 HBB1_RAT | A.GVASALAHKYH                                      | 36    | 1152.6  | -0.4 |
| Hemoglobin subunit beta-1 | sp P02091 HBB1_RAT | A.LAHKYH                                           | 23.77 | 767.408 | -0.4 |
| Hemoglobin subunit beta-1 | sp P02091 HBB1_RAT | A.Q(-17.03)AAFQKVVAGVASALAH KYH                    | 40.78 | 2078.11 | -0.9 |
| Hemoglobin subunit beta-1 | sp P02091 HBB1_RAT | A.SAIMGNPKVKAHGKVINAF NDGLKHLNLLKG.T               | 19.68 | 3413.87 | 0    |
| Hemoglobin subunit beta-1 | sp P02091 HBB1_RAT | A.SALAHKYH                                         | 32.01 | 925.477 | -0.8 |
| Hemoglobin subunit beta-1 | sp P02091 HBB1_RAT | C.AQAAFQKVVAGVASALAHK .Y                           | 38.2  | 1866.05 | -1.9 |
| Hemoglobin subunit beta-1 | sp P02091 HBB1_RAT | C.AQAAFQKVVAGVASALAHK YH                           | 49.86 | 2166.17 | -0.2 |
| Hemoglobin subunit beta-1 | sp P02091 HBB1_RAT | C.DKLHVDPENFRLLGNMIVIV LGHHL.G                     | 30.02 | 2878.56 | 0.9  |
| Hemoglobin subunit beta-1 | sp P02091 HBB1_RAT | D.PENFRLLGNMIVIVLGHHLG KEF.T                       | 30.8  | 2632.43 | 0.8  |
| Hemoglobin subunit beta-1 | sp P02091 HBB1_RAT | F.GDLSASAIMGNPKVKAHGK KV.I                         | 28.77 | 2194.19 | 0.1  |
| Hemoglobin subunit beta-1 | sp P02091 HBB1_RAT | F.NDGLKHLNLLK                                      | 23.25 | 1137.58 | -0.8 |
| Hemoglobin subunit beta-1 | sp P02091 HBB1_RAT | F.NDGLKHLNLLKGT.F                                  | 36.32 | 1423.74 | -0.1 |
| Hemoglobin subunit beta-1 | sp P02091 HBB1_RAT | F.NDGLKHLNLLKGTFAHL.S                              | 23.62 | 1891.99 | -1.1 |
| Hemoglobin subunit beta-1 | sp P02091 HBB1_RAT | F.NDGLKHLNLLKGTFAHLSEL .H                          | 20.7  | 2221.15 | -0.2 |
| Hemoglobin subunit beta-1 | sp P02091 HBB1_RAT | F.Q(-17.03)KVVAGVASALAHKYH                         | 38.05 | 1660.9  | -3.3 |
| Hemoglobin subunit beta-1 | sp P02091 HBB1_RAT | F.QKVVAGVASALAHKYH                                 | 43.19 | 1677.93 | -0.5 |
| Hemoglobin subunit beta-1 | sp P02091 HBB1_RAT | F.RLLGNMIVI.V                                      | 22.25 | 1027.62 | -0.7 |
| Hemoglobin subunit beta-1 | sp P02091 HBB1_RAT | F.RLLGNMIVIVLGHHL.G                                | 32.77 | 1684    | -0.6 |
| Hemoglobin subunit beta-1 | sp P02091 HBB1_RAT | G.KKVINAFNDGLKHLNLLKG. T                           | 19.45 | 2123.19 | 0.8  |
| Hemoglobin subunit beta-1 | sp P02091 HBB1_RAT | G.VASALAHKYH                                       | 33.83 | 1095.58 | -0.8 |
| Hemoglobin subunit beta-1 | sp P02091 HBB1_RAT | H.GKKVINAFNDGLKHLNLLK G.T                          | 23.41 | 2180.21 | -1.6 |
| Hemoglobin subunit beta-1 | sp P02091 HBB1_RAT | I.NAFNDGLKHLNLLKGT.F                               | 32.08 | 1755.89 | 0.2  |
| Hemoglobin subunit beta-1 | sp P02091 HBB1_RAT | I.NAFNDGLKHLNLLKGTFA.H                             | 34.09 | 1974    | -0.2 |
| Hemoglobin subunit beta-1 | sp P02091 HBB1_RAT | K.VVAGVASALAHKYH                                   | 21.71 | 1421.78 | -0.9 |
| Hemoglobin subunit beta-1 | sp P02091 HBB1_RAT | L.G(+42.01)KEFTPC(-1.01)AQAAFQKVVAGVASALA HKYH     | 26.75 | 2969.51 | 14.6 |
| Hemoglobin subunit beta-1 | sp P02091 HBB1_RAT | L.GHHLGK(+42.01)EFTPC(-1.01)AQAAFQKVVAGVASALA HKYH | 36.3  | 3413.73 | 13.3 |
| Hemoglobin subunit beta-1 | sp P02091 HBB1_RAT | L.GRLLVVYPW.T                                      | 31.54 | 1101.63 | -2.1 |

|                           |                    |                                                     |       |         |      |
|---------------------------|--------------------|-----------------------------------------------------|-------|---------|------|
| Hemoglobin subunit beta-1 | sp P02091 HBB1_RAT | L.GRLLVVYPWTQRYFDSF.G                               | 27.04 | 2146.1  | 0.1  |
| Hemoglobin subunit beta-1 | sp P02091 HBB1_RAT | L.HVDPENFRLLGNMIVI.V                                | 25.54 | 1865.98 | -3.2 |
| Hemoglobin subunit beta-1 | sp P02091 HBB1_RAT | L.HVDPENFRLLGNMIVIVLGH<br>HL.G                      | 45.02 | 2522.36 | -0.5 |
| Hemoglobin subunit beta-1 | sp P02091 HBB1_RAT | L.TDAEKAAVNLWGKVNPD<br>VGGEALGR.L                   | 28.49 | 2738.36 | -0.3 |
| Hemoglobin subunit beta-1 | sp P02091 HBB1_RAT | M.VHLTDAEK.A                                        | 25.96 | 911.471 | -0.8 |
| Hemoglobin subunit beta-1 | sp P02091 HBB1_RAT | M.VHLTDAEKA.A                                       | 32.22 | 982.508 | 0    |
| Hemoglobin subunit beta-1 | sp P02091 HBB1_RAT | M.VHLTDAEKAA.V                                      | 37.33 | 1053.55 | -0.3 |
| Hemoglobin subunit beta-1 | sp P02091 HBB1_RAT | M.VHLTDAEKAAV.N                                     | 37.22 | 1152.61 | -0.1 |
| Hemoglobin subunit beta-1 | sp P02091 HBB1_RAT | M.VHLTDAEKAAVN.G                                    | 48.92 | 1266.66 | -1.1 |
| Hemoglobin subunit beta-1 | sp P02091 HBB1_RAT | M.VHLTDAEKAAVNG(-.98).L                             | 34.67 | 1322.69 | -1.3 |
| Hemoglobin subunit beta-1 | sp P02091 HBB1_RAT | M.VHLTDAEKAAVNG.L                                   | 38.14 | 1323.68 | -0.7 |
| Hemoglobin subunit beta-1 | sp P02091 HBB1_RAT | M.VHLTDAEKAAVNL.W                                   | 28.03 | 1436.76 | -2   |
| Hemoglobin subunit beta-1 | sp P02091 HBB1_RAT | M.VHLTDAEKAAVNLW.G                                  | 34.9  | 1622.84 | -1   |
| Hemoglobin subunit beta-1 | sp P02091 HBB1_RAT | M.VHLTDAEKAAVNLWG.K                                 | 42    | 1679.86 | -1.3 |
| Hemoglobin subunit beta-1 | sp P02091 HBB1_RAT | M.VHLTDAEKAAVNLWGK.V                                | 41.76 | 1807.96 | -0.8 |
| Hemoglobin subunit beta-1 | sp P02091 HBB1_RAT | M.VHLTDAEKAAVNLWGK<br>N.P                           | 33.22 | 2021.07 | 1.8  |
| Hemoglobin subunit beta-1 | sp P02091 HBB1_RAT | M.VHLTDAEKAAVNLWGK<br>NPDDVG.G                      | 19.41 | 2504.27 | -0.6 |
| Hemoglobin subunit beta-1 | sp P02091 HBB1_RAT | M.VHLTDAEKAAVNLWGK<br>NPDDVGG.E                     | 45.09 | 2561.29 | -7.4 |
| Hemoglobin subunit beta-1 | sp P02091 HBB1_RAT | M.VHLTDAEKAAVNLWGK<br>NPDDVGGE.A                    | 20.32 | 2690.33 | 0.2  |
| Hemoglobin subunit beta-1 | sp P02091 HBB1_RAT | M.VHLTDAEKAAVNLWGK<br>NPDDVGGEA(-.98).L             | 38.15 | 2760.38 | -3.1 |
| Hemoglobin subunit beta-1 | sp P02091 HBB1_RAT | M.VHLTDAEKAAVNLWGK<br>NPDDVGGEAL(-.98).G            | 22.34 | 2873.47 | -0.7 |
| Hemoglobin subunit beta-1 | sp P02091 HBB1_RAT | M.VHLTDAEKAAVNLWGK<br>NPDDVGGEAL.G                  | 39.52 | 2874.45 | 0.2  |
| Hemoglobin subunit beta-1 | sp P02091 HBB1_RAT | M.VHLTDAEKAAVNLWGK<br>NPDDVGGEALG.R                 | 31.31 | 2931.47 | -3   |
| Hemoglobin subunit beta-1 | sp P02091 HBB1_RAT | M.VHLTDAEKAAVNLWGK<br>NPDDVGGEALGR.L                | 22.03 | 3087.57 | -3   |
| Hemoglobin subunit beta-1 | sp P02091 HBB1_RAT | M.VHLTDAEKAAVNLWGK<br>NPDDVGGEALGRLLVVYPWT<br>QR.Y  | 32.85 | 4343.28 | 3.2  |
| Hemoglobin subunit beta-1 | sp P02091 HBB1_RAT | M.VHLTDAEKAAVNLWGK<br>NPDDVGGEALGRLLVVYPWT<br>QRY.F | 16.64 | 4506.34 | -0.8 |
| Hemoglobin subunit beta-1 | sp P02091 HBB1_RAT | Q.KVVAGVASALAHKYH                                   | 40.25 | 1549.87 | -0.7 |
| Hemoglobin subunit beta-1 | sp P02091 HBB1_RAT | S.ALAHKYH                                           | 27.49 | 838.445 | -0.8 |
| Hemoglobin subunit beta-1 | sp P02091 HBB1_RAT | V.AGVASALAHKYH                                      | 34.11 | 1223.64 | -1.7 |

|                                                  |                      |                                                                 |       |         |      |
|--------------------------------------------------|----------------------|-----------------------------------------------------------------|-------|---------|------|
| Hemoglobin subunit beta-1                        | sp P02091 HBB1_RAT   | V.ASALAHKYH                                                     | 39.39 | 996.514 | 0    |
| Hemoglobin subunit beta-1                        | sp P02091 HBB1_RAT   | V.INAFNDGLKHLNLTGTF                                             | 19.9  | 1868.97 | -0.2 |
| Hemoglobin subunit beta-1                        | sp P02091 HBB1_RAT   | V.INAFNDGLKHLNLTGTFAL.S                                         | 18.01 | 2337.22 | -1.2 |
| Hemoglobin subunit beta-1                        | sp P02091 HBB1_RAT   | Y.PWTQRYFDSF.G                                                  | 16.3  | 1345.61 | 0.2  |
| Hemoglobin subunit beta-1                        | sp P02091 HBB1_RAT   | Q.AAFQKVVAGVASALAHKYH                                           | 25.96 | 1967.07 | -1.6 |
| Hemoglobin subunit beta-2                        | sp P02091 HBB1_RAT   | N.AFNDGLKHLNLTG.T                                               | 19.33 | 1540.8  | 0.5  |
| Hemoglobin subunit beta-2                        | sp P11517 HBB2_RAT   | M.VHLTDAEKATV.S                                                 | 34.24 | 1182.62 | 0    |
| Hemoglobin subunit beta-2                        | sp P11517 HBB2_RAT   | M.VHLTDAEKATVS.G                                                | 23.24 | 1269.66 | -1.1 |
| Hemoglobin subunit beta-2                        | sp P11517 HBB2_RAT   | M.VHLTDAEKATVSG.L                                               | 42.01 | 1326.68 | -1.1 |
| Hepatoma-derived growth factor-related protein 3 | sp Q923W4 HDGR3_RAT  | L.PEGAVKPPANKYPIFFF.G                                           | 27.19 | 1921.01 | -1.2 |
| Heterochromatin protein 1-binding protein 3      | sp Q6P747 HP1B3_RAT  | M.A(+42.01)TDMSQGELIHPKA LPLIVG.A                               | 39.87 | 2131.13 | -1.3 |
| Heterogeneous nuclear ribonucleoproteins A2/B1   | tr F1LM82 F1LM82_RAT | F.DDHPVDKIVL.Q                                                  | 21.8  | 1264.63 | 0.7  |
| High mobility group nucleosomal binding domain 2 | tr Q4KLJ0 Q4KLJ0_RAT | M.PKRKAEGDAKGDKAKVKD EPQRRSARLS.A                               | 40.41 | 3120.72 | -1   |
| High mobility group protein B1                   | sp P63159 HMGB1_RAT  | C.REEHKKKHPDASVNF.S                                             | 28.61 | 1820.93 | -0.6 |
| High mobility group protein B1                   | sp P63159 HMGB1_RAT  | M.SAKEKGFEDMAKADKAR.Y                                           | 48.75 | 2009.04 | -0.4 |
| High mobility group protein B1                   | sp P63159 HMGB1_RAT  | W.KTMSAKEKGFEDMAKADKAR.Y                                        | 26.63 | 2369.22 | 0.9  |
| High mobility group protein B1                   | sp P63159 HMGB1_RAT  | Y.RAKGKPDAAKGGVVKAEKSKKKKEEEDDEEEDDEEEEEEE EDEDEEEDDDDD(-.98).E | 25.35 | 6080.64 | -4.5 |
| High mobility group protein B1                   | sp P63159 HMGB1_RAT  | Y.RAKGKPDAAKGGVVKAEKSKKKKEEEDDEEEDDEEEEEEE EDEDEEEDDDDD.E       | 56    | 6081.62 | -2   |
| High mobility group protein B1                   | sp P63159 HMGB1_RAT  | Y.RAKGKPDAAKGGVVKAEKSKKKKEEEDDEEEDDEEEEEEE EDEDEEEDDDDE         | 73.48 | 6210.67 | 0.3  |
| High mobility group protein B1                   | sp P63159 HMGB1_RAT  | Y.RAKGKPDAAKGGVVKAEKSKKKKEEEDDEEEDDEEEEEEE EDEDEEEDDDDE(-.98)   | 52.04 | 6209.68 | -5.1 |
| High mobility group protein B1                   | sp P63159 HMGB1_RAT  | Y.EREMKTYIPPKGETKKKFKD PNAPKRPPS.A                              | 40.74 | 3396.83 | -0.2 |
| High mobility group protein B1                   | sp P63159 HMGB1_RAT  | Y.EREMKTYIPPKGETKKKFKD PNAPKRPPS.A.F                            | 33.26 | 3467.87 | 0.3  |
| High mobility group protein B2                   | sp P52925 HMGB2_RAT  | M.SAKEKSKFEDLAKSDKAR.Y                                          | 50.98 | 2037.09 | 0.3  |
| High mobility group protein B2                   | sp P52925 HMGB2_RAT  | Y.RAKGKSEVGKKGPGRPTGSKKKNEPEDEEEEEEEDEDEE EDEDEE                | 44.07 | 5504.37 | -0.5 |
| High mobility group protein B2                   | sp P52925 HMGB2_RAT  | Y.RAKGKSEVGKKGPGRPTGSKKKNEPEDEEEEEEEDEDEE EDEDE.E               | 22.48 | 5246.29 | 0.7  |

|                                              |                      |                                                                    |       |         |       |
|----------------------------------------------|----------------------|--------------------------------------------------------------------|-------|---------|-------|
| High mobility group protein B2               | sp P52925 HMGB2_RAT  | Y.RAKGKSEVGGKGPGRPTGS<br>KKKNEPEDEEEEEEEDEDEE<br>EEDEDEE(-.98)     | 38.07 | 5503.39 | -3.3  |
| Histidine triad nucleotide-binding protein 1 | sp P62959 HINT1_RAT  | F.HDISPQAPTHFLVIPKKHISQI.<br>S                                     | 24.32 | 2505.39 | 0.7   |
| Histidine triad nucleotide-binding protein 1 | sp P62959 HINT1_RAT  | M.A(+42.01)DEIAKAQVAQPGG<br>DTIFGKIL.R                             | 34.48 | 2283.21 | -1.7  |
| Histidine triad nucleotide-binding protein 1 | sp P62959 HINT1_RAT  | M.A(+42.01)DEIAKAQVAQPGG<br>DTIFGKIIRKEIPAKIIFEDDRCL<br>AF(-.98).H | 18.35 | 4427.37 | -12.4 |
| Histone H1.4                                 | sp P15865 H14_RAT    | L.KKALAAAGYDVEKNNSR.I                                              | 35.55 | 1833.97 | -1.7  |
| Histone H1.4                                 | sp P15865 H14_RAT    | M.S(+42.01)ETAPAAPAAPAPAE<br>KTPIKKKAR.K                           | 19.24 | 2442.36 | -0.3  |
| Histone H1.4                                 | sp P15865 H14_RAT    | M.S(+42.01)ETAPAAPAAPAPAE<br>KTPIKKKARKAAGGAKRKASG<br>PPV.S        | 25.89 | 3818.16 | 0.3   |
| Histone H1.4                                 | sp P15865 H14_RAT    | V.SELITKAVAASKERSGVS.L                                             | 47.79 | 1832    | -1    |
| Histone H1.4                                 | sp P15865 H14_RAT    | V.SELITKAVAASKERSGVSLA.<br>A                                       | 32.76 | 2016.12 | -0.2  |
| Histone H1.4                                 | sp P15865 H14_RAT    | V.SELITKAVAASKERSGVSLA<br>A.L                                      | 22.59 | 2087.16 | -0.2  |
| Histone H1.4                                 | sp P15865 H14_RAT    | A.ALKKALAAAGYDVEKNNSR<br>.I                                        | 36.12 | 2018.09 | 0.3   |
| Histone H1.4                                 | sp P15865 H14_RAT    | R.KASGPPVSELITKAVAASKE<br>RSGVSL.A                                 | 17.79 | 2581.44 | -6    |
| Histone H1t                                  | sp P06349 H1T_RAT    | MSETAPAASST.L                                                      | 17.11 | 1051.45 | 7.5   |
| Histone H2A                                  | tr D3ZXP3 D3ZXP3_RAT | A.TVGPAPAGGKKASQASQE<br>Y                                          | 46.22 | 1974.02 | 0     |
| Histone H2A type 1                           | sp P02262 H2A1_RAT   | L.AAVLEYLTAEILELAGNAAR<br>DNKKTRIIPRHL.Q                           | 15.13 | 3559    | -1.2  |
| Histone H2A type 1-C                         | sp P0C169 H2A1C_RAT  | I.AQGGVLPNIQAVLLPKKTESH<br>HKAKGK                                  | 34.13 | 2848.64 | -1.3  |
| Histone H2A type 1-C                         | sp P0C169 H2A1C_RAT  | I.RNDEELNKLGRVTI.A                                                 | 27.8  | 1768.98 | 1.7   |
| Histone H2A type 1-C                         | sp P0C169 H2A1C_RAT  | L.AGNAARDNKKTRIIPRHL.Q                                             | 35.44 | 2030.16 | 0.3   |
| Histone H2A type 1-C                         | sp P0C169 H2A1C_RAT  | L.ELAGNAARDNKKTRIIPR.H                                             | 19.31 | 2022.14 | -0.1  |
| Histone H2A type 1-C                         | sp P0C169 H2A1C_RAT  | L.LRKGNYAERVGAGAPV.Y                                               | 15.26 | 1656.91 | 0.3   |
| Histone H2A type 1-C                         | sp P0C169 H2A1C_RAT  | L.QLAIRNDEELNKLGRVTI.A                                             | 16.5  | 2194.24 | 0.3   |
| Histone H2A type 1-C                         | sp P0C169 H2A1C_RAT  | M.S(+42.01)GRGKQGGKARAK<br>AKSRSSRAGLQFPVG.R                       | 15    | 2883.6  | -1.3  |
| Histone H2A type 1-C                         | sp P0C169 H2A1C_RAT  | I.RNDEELNKLGRVTI.I                                                 | 38.89 | 1655.9  | -1.8  |
| Histone H2A type 1-C                         | sp P0C169 H2A1C_RAT  | L.AAVLEYLTAEILELAGNAAR<br>DNKKTRI.I                                | 31.47 | 2829.53 | 0     |
| Histone H2A type 1-C                         | sp P0C169 H2A1C_RAT  | L.AGNAARDNKKTRIIPRHLQ.L                                            | 28.81 | 2158.22 | 0     |
| Histone H2A type 1-C                         | sp P0C169 H2A1C_RAT  | L.QLAIRNDEELNKLGRVTI.I                                             | 28.15 | 2081.16 | 0     |
| Histone H2A type 1-C                         | sp P0C169 H2A1C_RAT  | M.S(+42.01)GRGKQGGKARAK<br>AKSRSSRAGL                              | 22.74 | 2242.25 | -1.3  |
| Histone H2A type 1-C                         | sp P0C169 H2A1C_RAT  | M.S(+42.01)GRGKQGGKARAK<br>AKSRSSRAGLQFPVGRVH.R                    | 20.79 | 3275.83 | 0.8   |
| Histone H2A type 1-C                         | sp P0C169 H2A1C_RAT  | Q.AVLLPKKTESHHKAKGK                                                | 19.33 | 1871.11 | 0.2   |
| Histone H2A type 1-C                         | sp P0C169 H2A1C_RAT  | R.KGNYAERVGAGAPV.Y                                                 | 37.01 | 1387.72 | 0     |
| Histone H2A type 2-A                         | sp P0CC09 H2A2A_RAT  | H.RLLRKGNYAERVGAGAPV.Y                                             | 16.32 | 1926.09 | -0.2  |

|                      |                      |                                                        |       |         |      |
|----------------------|----------------------|--------------------------------------------------------|-------|---------|------|
| Histone H2A type 2-A | sp P0CC09 H2A2A_RAT  | I.RNDEELNKLKGKVT.I                                     | 41.33 | 1627.89 | -3.3 |
| Histone H2A type 2-A | sp P0CC09 H2A2A_RAT  | I.RNDEELNKLKGKVTI.A                                    | 32.39 | 1740.97 | -0.1 |
| Histone H2A type 2-A | sp P0CC09 H2A2A_RAT  | L.AIRNDEELNKLKGKVTI.A                                  | 24.67 | 1925.09 | 8.6  |
| Histone H2A type 2-A | sp P0CC09 H2A2A_RAT  | L.ELAGNAARDNKKTRIIPRHL.Q                               | 18.78 | 2272.29 | -1.4 |
| Histone H2A type 2-A | sp P0CC09 H2A2A_RAT  | L.QLAIRNDEELNKLKGKVT.I                                 | 20.73 | 2053.15 | -1   |
| Histone H2A type 2-A | sp P0CC09 H2A2A_RAT  | L.QLAIRNDEELNKLKGKVTI.A                                | 26.6  | 2166.24 | 0.2  |
| Histone H2A type 2-A | sp P0CC09 H2A2A_RAT  | L.TAEILELAGNAARDNKKTRII PRHL.Q                         | 19.41 | 2799.58 | 1.4  |
| Histone H2A type 2-A | sp P0CC09 H2A2A_RAT  | L.TAEILELAGNAARDNKKTRII PRHLQLA.I                      | 21.99 | 3111.76 | 5.2  |
| Histone H2A type 2-A | sp P0CC09 H2A2A_RAT  | M.AAVLEYLTAEILELAGNAAR DNKKTRI                         | 31.47 | 2829.53 | 0    |
| Histone H2A type 2-A | sp P0CC09 H2A2A_RAT  | M.AAVLEYLTAEILELAGNAAR DNKKTRIIPRHL.Q                  | 15.13 | 3559    | -1.2 |
| Histone H2A type 2-A | sp P0CC09 H2A2A_RAT  | M.S(+42.01)GRGKQGGKARAK AKSRSSRAGLQFPVGRVHR.L          | 20.78 | 3431.93 | -1.7 |
| Histone H2A type 2-A | sp P0CC09 H2A2A_RAT  | M.S(+42.01)GRGKQGGKARAK AKSRSSRAGLQFPVGRVHRL RKG.N     | 17.22 | 3999.32 | -1.7 |
| Histone H2A type 2-A | sp P0CC09 H2A2A_RAT  | M.SGRGK(+42.01)QGGKARAK AKSRSSRAGLQFPVG.R              | 15.61 | 2883.6  | -0.8 |
| Histone H2A type 2-A | sp P0CC09 H2A2A_RAT  | M.SGRGK(+42.01)QGGKARAK AKSRSSRAGLQFPVGRVH.R           | 18.8  | 3275.83 | 0.5  |
| Histone H2A type 2-A | sp P0CC09 H2A2A_RAT  | N.IQAVLLPKKTESHHKAKG.K Y.LTAEILELAGNAARDNKKTR IIPRHL.Q | 30.78 | 1984.16 | -1.7 |
| Histone H2A type 2-A | sp P0CC09 H2A2A_RAT  | N.IQAVLLPKKTESHHKAKG.K Y.LTAEILELAGNAARDNKKTR IIPRHL.Q | 21.65 | 2912.67 | -0.9 |
| Histone H2A type 3   | sp Q4FZT6 H2A3_RAT   | L.RKGNYSERVGAGAPV.Y                                    | 17.97 | 1559.82 | -1   |
| Histone H2B          | tr G3V8B3 G3V8B3_RAT | A.VRLLLPGELAKHAVSEGTKA VTKYTSSK                        | 40.47 | 2982.69 | -4.8 |
| Histone H2B          | tr G3V8B3 G3V8B3_RAT | E.GTKAVTKYTSSK                                         | 31.74 | 1269.69 | -0.4 |
| Histone H2B          | tr G3V8B3 G3V8B3_RAT | E.LAKHAVSEGTKAVTKYTSSK                                 | 16.68 | 2105.15 | -2.6 |
| Histone H2B          | tr G3V8B3 G3V8B3_RAT | E.RIAGEASRLAH.Y                                        | 23.94 | 1179.65 | 0.3  |
| Histone H2B          | tr G3V8B3 G3V8B3_RAT | F.ERIAGEASRLAH.Y                                       | 30.89 | 1308.69 | 0.3  |
| Histone H2B          | tr G3V8B3 G3V8B3_RAT | F.VNDIFERIAGEASRL.L                                    | 47.77 | 1575.8  | -0.2 |
| Histone H2B          | tr G3V8B3 G3V8B3_RAT | F.VNDIFERIAGEASRL.A                                    | 47.55 | 1688.88 | -0.3 |
| Histone H2B          | tr G3V8B3 G3V8B3_RAT | F.VNDIFERIAGEASRLAH.Y                                  | 41.14 | 1896.98 | -2.6 |
| Histone H2B          | tr G3V8B3 G3V8B3_RAT | F.VNDIFERIAGEASRLAHY.N                                 | 47.03 | 2060.04 | -0.8 |
| Histone H2B          | tr G3V8B3 G3V8B3_RAT | F.VNDIFERIAGEASRLAHYNK R.S                             | 36.17 | 2458.28 | -2.4 |
| Histone H2B          | tr G3V8B3 G3V8B3_RAT | G.ELAKHAVSEGTKAVTKYTSS K                               | 24.58 | 2234.19 | -0.1 |
| Histone H2B          | tr G3V8B3 G3V8B3_RAT | G.TKAVTKYTSSK                                          | 31.04 | 1212.67 | 0.3  |
| Histone H2B          | tr G3V8B3 G3V8B3_RAT | H.AVSEGTKAVTKYTSSK                                     | 27.89 | 1655.87 | 0    |
| Histone H2B          | tr G3V8B3 G3V8B3_RAT | K.HAVSEGTKAVTKYTSSK                                    | 61.95 | 1792.93 | 0.3  |
| Histone H2B          | tr G3V8B3 G3V8B3_RAT | L.AKHAVSEGTKAVTKYTSSK                                  | 20.62 | 1992.06 | -0.3 |
| Histone H2B          | tr G3V8B3 G3V8B3_RAT | L.LPGELAKHAVSEGTKAVTK. Y                               | 65.97 | 1935.08 | -0.7 |
| Histone H2B          | tr G3V8B3 G3V8B3_RAT | L.LPGELAKHAVSEGTKAVTKY TSSK                            | 52.26 | 2501.35 | -1.2 |

|             |                          |                                    |       |         |       |
|-------------|--------------------------|------------------------------------|-------|---------|-------|
| Histone H2B | tr G3V8B3 G3V8B3_RAT     | M.PEPAKSAPAPKKGSKKAVT<br>KAQKKD.G  | 39.39 | 2589.5  | -0.5  |
| Histone H2B | tr G3V8B3 G3V8B3_RAT     | N.DIFERIAGEASRLAH.Y                | 26.26 | 1683.87 | -1.3  |
| Histone H2B | tr G3V8B3 G3V8B3_RAT     | P.GELAKHAVSEGTKAVTK.Y              | 48.36 | 1724.94 | -2.2  |
| Histone H2B | tr G3V8B3 G3V8B3_RAT     | V.NDIFERIAGEASR.L                  | 33.28 | 1476.73 | -3.2  |
| Histone H2B | tr G3V8B3 G3V8B3_RAT     | V.NDIFERIAGEASRLAH.Y               | 38.36 | 1797.91 | 3.3   |
| Histone H2B | tr G3V8B3 G3V8B3_RAT     | V.NDIFERIAGEASRLAHY.N              | 50.08 | 1960.98 | -2.2  |
| Histone H2B | tr G3V8B3 G3V8B3_RAT     | V.RLLLPGELAK.H                     | 32.58 | 1108.7  | -0.8  |
| Histone H2B | tr G3V8B3 G3V8B3_RAT     | V.RLLLPGELAKHAVSEGTKAV<br>TK.Y     | 64.25 | 2317.35 | -6.1  |
| Histone H2B | tr G3V8B3 G3V8B3_RAT     | V.RLLLPGELAKHAVSEGTKAV<br>TKYTSSK  | 47.59 | 2883.62 | 0.7   |
| Histone H2B | tr G3V8B3 G3V8B3_RAT     | Y.KVLKQVHPDTGISSK.A                | 23.57 | 1635.93 | -11.3 |
| Histone H2B | tr G3V8B3 G3V8B3_RAT     | Y.KVLKQVHPDTGISSKAMG.I             | 24.08 | 1895.03 | -1.5  |
| Histone H2B | tr G3V8B3 G3V8B3_RAT     | Y.KVLKQVHPDTGISSKAMG.I<br>M        | 29.19 | 2008.11 | -0.7  |
| Histone H2B | tr G3V8B3 G3V8B3_RAT     | Y.KVLKQVHPDTGISSKAMGIM<br>NS.F     | 64.27 | 2340.23 | -1.4  |
| Histone H2B | tr G3V8B3 G3V8B3_RAT     | Y.KVLKQVHPDTGISSKAMGIM<br>NSF.V    | 29.24 | 2487.3  | -1.9  |
| Histone H2B | tr G3V8B3 G3V8B3_RAT     | Y.NKRSTITSREIQT.A                  | 18.08 | 1532.83 | 0.2   |
| Histone H2B | tr G3V8B3 G3V8B3_RAT     | Y.NKRSTITSREIQT.A.V                | 15.98 | 1603.86 | -0.6  |
| Histone H2B | tr G3V8B3 G3V8B3_RAT     | Y.NKRSTITSREIQTAV.R                | 24.68 | 1702.93 | -1.1  |
| Histone H2B | tr G3V8B3 G3V8B3_RAT     | Y.NKRSTITSREIQTAVR.L               | 50.79 | 1859.03 | -0.6  |
| Histone H2B | tr G3V8B3 G3V8B3_RAT     | Y.VYKVLKQVHPDTGISSKAM<br>GLM       | 39.03 | 2270.25 | -0.8  |
| Histone H2B | tr G3V8B3 G3V8B3_RAT     | Y.VYKVLKQVHPDTGISSKAM<br>GIMNS.F   | 22.79 | 2602.36 | 0.5   |
| Histone H2B | tr G3V8B3 G3V8B3_RAT     | Y.VYKVLKQVHPDTGISSKAM<br>GIMNSF.V  | 29.09 | 2749.43 | 2.3   |
| Histone H2B | tr Q9Z2Q9 Q9Z2Q9_RAT     | M.PDPAKSAPAPKKGSKKAVT<br>KVQKKD.G  | 38.21 | 2603.51 | -0.7  |
| Histone H2B | tr D3ZNH4 D3ZNH4_RA<br>T | E.LAKHAVSEGTKAVTKYTSSK<br>.I       | 16.68 | 2105.15 | -2.6  |
| Histone H2B | tr D3ZWM5 D3ZWM5_R<br>AT | A.KHAVSEGTKAVTKYTSSK               | 30.52 | 1921.03 | -0.3  |
| Histone H2B | tr D3ZWM5 D3ZWM5_R<br>AT | F.ERIAGEASRLAHY.N                  | 27.12 | 1471.75 | -0.3  |
| Histone H2B | tr D3ZWM5 D3ZWM5_R<br>AT | F.VNDIFERIA                        | 32.74 | 1004.53 | 4.2   |
| Histone H2B | tr D3ZWM5 D3ZWM5_R<br>AT | I.MNSFVNDIFER.I                    | 15.56 | 1370.63 | -1    |
| Histone H2B | tr D3ZWM5 D3ZWM5_R<br>AT | L.QVHPDTGISSKAMGIMNS.F             | 16.33 | 1999.98 | -1.9  |
| Histone H2B | tr D3ZWM5 D3ZWM5_R<br>AT | L.LLPGELAKHAVSEGTKAVTK<br>YTSSK    | 16.45 | 2614.43 | -0.2  |
| Histone H2B | tr D3ZWM5 D3ZWM5_R<br>AT | L.LPGELAKHAVSEGTKAVTKY<br>.T       | 31.45 | 2098.14 | -2.6  |
| Histone H2B | tr D3ZWM5 D3ZWM5_R<br>AT | T.AVRLLPGELAKHAVSEGTK<br>AVTKYTSSK | 20.23 | 3053.72 | -1.6  |
| Histone H2B | tr D3ZWM5 D3ZWM5_R<br>AT | V.RLLLPGELA.K                      | 17.45 | 980.602 | 0     |
| Histone H2B | tr D3ZWM5 D3ZWM5_R<br>AT | V.RLLLPGELAKHAV.S                  | 38.19 | 1415.86 | -0.6  |



|                                   |                          |                                                                                         |       |         |      |
|-----------------------------------|--------------------------|-----------------------------------------------------------------------------------------|-------|---------|------|
| Histone H2B                       | tr D3ZWM5 D3ZWM5_R<br>AT | V.RLLPGELAKHAVSEGTKAV<br>T.K                                                            | 20.29 | 2189.25 | 0.5  |
| Histone H2B                       | tr D3ZWM5 D3ZWM5_R<br>AT | Y.NKRSTITSREIQTAVRL.L                                                                   | 35.31 | 1972.12 | 0    |
| Histone H2B                       | tr D3ZWM5 D3ZWM5_R<br>AT | Y.VYKVLKQVHPDTGISSKAM<br>GIMNSFV.N                                                      | 28    | 2848.5  | -7.2 |
| Histone H2B                       | tr D4A817 D4A817_RAT     | V.RLLPGELAKHA.V                                                                         | 32.38 | 1316.79 | -0.7 |
| Histone H2B                       | tr D4A817 D4A817_RAT     | V.RLLPGELAKHAVSEGTKAV<br>TKY.T                                                          | 18    | 2480.41 | -0.2 |
| Histone H3                        | tr D3ZJ08 D3ZJ08_RAT     | A.RTKQTARKSTGGK(+42.01)A<br>PRK(+42.01)QLATK(+42.01)AA<br>RKSAPATGGVKKPHRYRPGTV<br>AL.R | 18.15 | 5107.92 | 12.8 |
| Histone H3                        | tr D3ZJ08 D3ZJ08_RAT     | L.REIRRYQKSTEL.L                                                                        | 26.39 | 1577.86 | -1   |
| Histone H3                        | tr D3ZK97 D3ZK97_RAT     | F.QRLVREIAQDF.K                                                                         | 20.07 | 1373.74 | 0    |
| Histone H3                        | tr D3ZK97 D3ZK97_RAT     | L.IRKLPF.Q                                                                              | 15.49 | 772.496 | 0.2  |
| Histone H3                        | tr B0BMY8 B0BMY8_RA<br>T | H.AKRVTIMPKDIQLARRIRGE<br>RA                                                            | 25.48 | 2577.51 | -0.7 |
| Histone H3                        | tr D3ZJ08 D3ZJ08_RAT     | L.LIRKLPF.Q                                                                             | 20.81 | 885.58  | 0.5  |
| Histone H4                        | sp P62804 H4_RAT         | A.MDVVYALKRQGRTLYGFGG                                                                   | 18.86 | 2130.1  | -0.2 |
| Histone H4                        | sp P62804 H4_RAT         | D.VVYALKRQGRTLYGFGG                                                                     | 19.88 | 1884.04 | -1.5 |
| Histone H4                        | sp P62804 H4_RAT         | G.RTLYGFGG                                                                              | 31.39 | 869.44  | -0.6 |
| Histone H4                        | sp P62804 H4_RAT         | I.RDAVITYTEHAKRKT.VT.A.M                                                                | 20.64 | 1946.03 | -6   |
| Histone H4                        | sp P62804 H4_RAT         | I.SGLIYEETRGLV.K.V                                                                      | 18.61 | 1463.8  | -0.1 |
| Histone H4                        | sp P62804 H4_RAT         | I.YEETRGLV.K.V                                                                          | 18.1  | 1093.58 | -0.5 |
| Histone H4                        | sp P62804 H4_RAT         | K.TVTAMDVVYALKRQGRTLY<br>GFGG                                                           | 28.06 | 2502.31 | -0.7 |
| Histone H4                        | sp P62804 H4_RAT         | Q.GRTLYGFGG                                                                             | 30.84 | 926.461 | -1.9 |
| Histone H4                        | sp P62804 H4_RAT         | R.QGRTLYGFGG                                                                            | 37.11 | 1054.52 | -0.1 |
| Histone H4                        | sp P62804 H4_RAT         | V.FLENVIRDAVITYTEHAKRKT<br>VT.A                                                         | 18.04 | 2590.39 | 0.8  |
| Histone H4                        | sp P62804 H4_RAT         | V.FLENVIRDAVITYTEHAKRKT<br>VT.A.M                                                       | 23.88 | 2661.42 | 1.6  |
| Histone H4                        | sp P62804 H4_RAT         | Y.TEHA KRKTVTAM(+15.99)DV<br>.V                                                         | 47.77 | 1601.82 | -1.5 |
| Histone H4                        | sp P62804 H4_RAT         | Y.TEHA KRKTVTAM(+15.99)DV<br>VY.A                                                       | 50.73 | 1863.95 | -2.7 |
| Histone H4                        | sp P62804 H4_RAT         | Y.TEHA KRKTVTAMDVVYALK<br>RQGRTLYGFGG                                                   | 31.6  | 3352.78 | -0.8 |
| Histone H4                        | tr B0BMY8 B0BMY8_RA<br>T | M.ARTKQTARKSTGGKAPRKQ<br>L.A.T                                                          | 22.59 | 2253.31 | 0.8  |
| Histone H4                        | sp P62804 H4_RAT         | Y.ALKRQGRTLY.G                                                                          | 16.89 | 1204.7  | 0.3  |
| Histone H4                        | sp P62804 H4_RAT         | Y.ALKRQGRTLYGFGG                                                                        | 33.07 | 1522.84 | -0.2 |
| Histone H5                        | tr B0BMY8 B0BMY8_RA<br>T | M.ARTKQTARKSTGGK(+42.01)<br>APRKQLA.T                                                   | 24.09 | 2295.32 | -0.1 |
| Histone H6                        | tr B0BMY8 B0BMY8_RA<br>T | D.IQLARRIRGERA                                                                          | 16.67 | 1437.86 | -0.2 |
| Interferon regulatory<br>factor 3 | tr Q5XIB0 Q5XIB0_RAT     | M.G(+42.01)TPKPLILPWLVSQ.L<br>D                                                         | 24.64 | 1703    | -2   |
| L-gulonolactone<br>oxidase        | sp P10867 GGLO_RAT       | G.THNTGIKH.G                                                                            | 24.67 | 906.467 | -0.4 |
| Lumican                           | sp P51886 LUM_RAT        | A.SLKGLKSLEYLDL.S                                                                       | 18.52 | 1477.84 | 5.7  |

|                                           |                     |                                                                           |       |         |      |
|-------------------------------------------|---------------------|---------------------------------------------------------------------------|-------|---------|------|
| Lumican                                   | sp P51886 LUM_RAT   | F.DVKSFCKILGPLS.Y                                                         | 23.87 | 1405.76 | -0.3 |
| Lumican                                   | sp P51886 LUM_RAT   | F.NQMSKLPAGLPT.S                                                          | 17.46 | 1255.66 | -0.7 |
| Lumican                                   | sp P51886 LUM_RAT   | F.NQMSKLPAGLPTSLLT.L                                                      | 24.63 | 1669.91 | -2.1 |
| Lumican                                   | sp P51886 LUM_RAT   | L.DNNKITNIPDEYFNR.F                                                       | 50.28 | 1851.88 | -0.9 |
| Lumican                                   | sp P51886 LUM_RAT   | L.ILDHNLENKIKGKV.F                                                        | 36.97 | 1820.05 | 0    |
| Lumican                                   | sp P51886 LUM_RAT   | L.KSIPTVNENLEN.Y                                                          | 31.42 | 1356.69 | -0.1 |
| Lumican                                   | sp P51886 LUM_RAT   | L.KSVPMVPPGIK.Y                                                           | 18.94 | 1151.67 | -0.2 |
| Lumican                                   | sp P51886 LUM_RAT   | L.QHNQLKEEAVSASLKGLKSL<br>E.Y                                             | 23.86 | 2308.24 | 1.1  |
| Lumican                                   | sp P51886 LUM_RAT   | L.QWLILDHNLENKIKGKV.F                                                     | 22.11 | 2247.27 | -0.2 |
| Lumican                                   | sp P51886 LUM_RAT   | L.SFNQMSKLPAGLPTSLLT.L                                                    | 30.85 | 1904.01 | 0.9  |
| Lumican                                   | sp P51886 LUM_RAT   | L.SFNQMSKLPAGLPTSLLTL.Y                                                   | 28.54 | 2017.09 | 0.4  |
| Lumican                                   | sp P51886 LUM_RAT   | M.SKLPAGLPTSLLTL.Y                                                        | 26.94 | 1409.85 | -2.6 |
| Lumican                                   | sp P51886 LUM_RAT   | M.SKLPAGLPTSLLTLY.L                                                       | 39.67 | 1572.91 | -0.8 |
| Lumican                                   | sp P51886 LUM_RAT   | Y.LDNNKITNIPDEY.F                                                         | 27.66 | 1547.75 | -2.4 |
| Lumican                                   | sp P51886 LUM_RAT   | Y.LDNNKITNIPDEYFNR.F                                                      | 21.28 | 1964.96 | 0.5  |
| Lumican                                   | sp P51886 LUM_RAT   | Y.LDNNKITNIPDEYFNRFTGLQ<br>.Y                                             | 32.9  | 2511.24 | -0.6 |
| Lumican                                   | sp P51886 LUM_RAT   | Y.NKLKSIPTVNENLEN.Y                                                       | 48.11 | 1711.91 | 0    |
| Lumican                                   | sp P51886 LUM_RAT   | Y.YLEVNKLEK.F                                                             | 35.98 | 1134.63 | -0.8 |
| Macrophage migration<br>inhibitory factor | sp P30904 MIF_RAT   | L.AQATGKPAQYIAVHVVPDQ<br>L.M                                              | 51.61 | 2105.13 | -2.3 |
| Macrophage migration<br>inhibitory factor | sp P30904 MIF_RAT   | L.HISPDRVYINYY.D                                                          | 38.49 | 1538.75 | -3.8 |
| Macrophage migration<br>inhibitory factor | sp P30904 MIF_RAT   | M.PMFIVNTNVPRA.S                                                          | 20.93 | 1357.72 | -1   |
| Macrophage migration<br>inhibitory factor | sp P30904 MIF_RAT   | M.PMFIVNTNVPRASVPEGFLS<br>ELT(+79.97)QLAQAT(+79.97)<br>GK(+42.01)(-.98).P | 15.3  | 3643.75 | 12.9 |
| Macrophage migration<br>inhibitory factor | sp P30904 MIF_RAT   | M.PMFIVNTNVPRASVPEGFLS<br>ELTQQL.A                                        | 34.05 | 2886.49 | -1.9 |
| Macrophage migration<br>inhibitory factor | sp P30904 MIF_RAT   | N.TNVPRASVPEGFLSELTQQL.<br>A                                              | 28.24 | 2185.14 | -1.5 |
| Macrophage migration<br>inhibitory factor | sp P30904 MIF_RAT   | V.PRASVPEGFLSELTQQL.A                                                     | 38.99 | 1870.98 | -9.3 |
| Mast cell protease 1                      | sp P09650 MCPT1_RAT | A.HLEITTERG.Y                                                             | 46.01 | 1054.54 | -0.5 |
| Mast cell protease 1                      | sp P09650 MCPT1_RAT | A.HLEITTERGY.K                                                            | 36.29 | 1217.6  | -0.7 |
| Mast cell protease 1                      | sp P09650 MCPT1_RAT | A.VDVIPLPQPSDF.L                                                          | 26.76 | 1325.69 | 0.5  |
| Mast cell protease 1                      | sp P09650 MCPT1_RAT | C.RAAGWGQTGVTKPTSNT.L                                                     | 33.02 | 1730.87 | -0.5 |
| Mast cell protease 1                      | sp P09650 MCPT1_RAT | E.IIGGVESRPHSRP.Y                                                         | 23.01 | 1403.76 | 0.4  |
| Mast cell protease 1                      | sp P09650 MCPT1_RAT | E.IIGGVESRPHSRPY.M                                                        | 22.39 | 1566.83 | 4.3  |
| Mast cell protease 1                      | sp P09650 MCPT1_RAT | F.TRISPYVPW.I                                                             | 16.01 | 1117.59 | -0.4 |
| Mast cell protease 1                      | sp P09650 MCPT1_RAT | I.GGVESRPHSRPY.M                                                          | 17.15 | 1340.66 | -1.7 |
| Mast cell protease 1                      | sp P09650 MCPT1_RAT | I.IIGGVESRPHSRPY.M                                                        | 18.72 | 1453.74 | 0    |
| Mast cell protease 1                      | sp P09650 MCPT1_RAT | I.KVEKQIVHPN.Y.N.F                                                        | 35.87 | 1467.78 | 0    |
| Mast cell protease 1                      | sp P09650 MCPT1_RAT | L.GVHDVSKTESTQQKIKVEKQ<br>IVHPN.Y                                         | 38.12 | 2828.51 | -0.7 |

|                                      |                      |                                            |       |         |      |
|--------------------------------------|----------------------|--------------------------------------------|-------|---------|------|
| Mast cell protease 1                 | sp P09650 MCPT1_RAT  | L.GVHDVSKTESTQQKIKVEKQ<br>IVHPNYN(-.98).F  | 25.56 | 3104.64 | -7.1 |
| Mast cell protease 1                 | sp P09650 MCPT1_RAT  | L.GVHDVSKTESTQQKIKVEKQ<br>IVHPNYN.F        | 53.48 | 3105.62 | -1.3 |
| Mast cell protease 1                 | sp P09650 MCPT1_RAT  | L.LKLQKKAKVTPA.V                           | 30.15 | 1323.86 | -0.2 |
| Mast cell protease 1                 | sp P09650 MCPT1_RAT  | T.LGVHDVSKTESTQQK.I                        | 42.93 | 1655.85 | -1.7 |
| Mast cell protease 1                 | sp P09650 MCPT1_RAT  | T.LGVHDVSKTESTQQKIKVEK<br>QIVHPNYN.F       | 24.73 | 3218.7  | -0.6 |
| Mast cell protease 1                 | sp P09650 MCPT1_RAT  | V.DVIPLPQPSDF.L                            | 20.27 | 1226.62 | -0.1 |
| Mast cell protease 1                 | sp P09650 MCPT1_RAT  | V.HDVSKTESTQQKIKVEKQIV<br>HPN.Y            | 20.76 | 2672.42 | -4.3 |
| Mast cell protease 1                 | sp P09650 MCPT1_RAT  | V.HDVSKTESTQQKIKVEKQIV<br>HPNYN.F          | 31.89 | 2949.53 | -0.7 |
| Mast cell protease 1                 | sp P09650 MCPT1_RAT  | V.TLGVHDVSKTESTQQK.I                       | 15.13 | 1756.9  | 0.7  |
| Mast cell protease 1                 | sp P09650 MCPT1_RAT  | V.TLGVHDVSKTESTQQKIKVE<br>KQIVHPNYN.F      | 29.03 | 3319.75 | -0.2 |
| Mast cell protease 1                 | sp P09650 MCPT1_RAT  | W.GQTGVTKPTSNTLREVKQR.<br>I                | 16.53 | 2099.14 | 0.2  |
| Mast cell protease 1                 | sp P09650 MCPT1_RAT  | Y.KGDSGGPLVCAGVAHGIVS.<br>Y                | 17.46 | 1722.87 | 1.9  |
| Mast cell protease 1                 | sp P09650 MCPT1_RAT  | Y.NFQVCVGSPrK.I                            | 30.21 | 1233.63 | -0.4 |
| Mast cell protease 1                 | sp P09650 MCPT1_RAT  | Y.NFQVCVGSPrKIRSA.Y                        | 21.96 | 1660.88 | -0.5 |
| Mast cell protease 1                 | sp P09650 MCPT1_RAT  | Y.NFYSNLHDI.M                              | 34.46 | 1121.51 | -0.5 |
| Mast cell protease 1                 | sp P09650 MCPT1_RAT  | Y.NFYSNLHDIM.L                             | 29.52 | 1252.55 | 0.7  |
| Mast cell protease 1                 | sp P09650 MCPT1_RAT  | Y.SNLHDIM(+15.99).L                        | 23.7  | 844.375 | -0.4 |
| Mast cell protease 1                 | sp P09650 MCPT1_RAT  | Y.SNLHDIM.L                                | 32.2  | 828.38  | -0.8 |
| Mast cell protease 1                 | sp P09650 MCPT1_RAT  | Y.SNLHDIMLL.K                              | 15.35 | 1054.55 | -0.3 |
| Mast cell protease 1                 | sp P09650 MCPT1_RAT  | Y.SNLHDIMLLK.L                             | 27.52 | 1182.64 | -1.5 |
| Mast cell protease 1                 | sp P09650 MCPT1_RAT  | R.AAGWGQTVTKPTSNT.L                        | 51.13 | 1574.77 | -1.5 |
| Mast cell protease 1                 | sp P09650 MCPT1_RAT  | R.AAGWGQTVTKPTSNTLRE<br>VKQR.I             | 34.9  | 2484.32 | 0.2  |
| Microtubule associated<br>protein 1A | tr Q63330 Q63330_RAT | K.KEEGRKKEEKDAKKDEKRK<br>DTKPEVKKLSKPD.L.K | 41.72 | 3937.2  | 0    |
| Microtubule-associated<br>protein    | tr A0JN25 A0JN25_RAT | A.TLADEVASLAKQGL                           | 28.35 | 1501.8  | -3.2 |
| Microtubule-associated<br>protein 1B | sp P15205 MAP1B_RAT  | A.ALKPKVAKKEEPTKKEPI.A                     | 25.87 | 2033.22 | -0.4 |
| Microtubule-associated<br>protein 1B | sp P15205 MAP1B_RAT  | A.SPKKKESVEKAMKTTTTPEV<br>K.A              | 18.66 | 2346.28 | 0.4  |
| Microtubule-associated<br>protein 1B | sp P15205 MAP1B_RAT  | E.KTPKVESKEKIVVKKDKPGK<br>VE.S             | 22.6  | 2493.49 | 0.9  |
| Microtubule-associated<br>protein 1B | sp P15205 MAP1B_RAT  | E.SKPSVTEKEVPSKEEQSPVKA<br>EVAEKAA.T       | 29.78 | 2981.56 | -2.6 |
| Microtubule-associated<br>protein 1B | sp P15205 MAP1B_RAT  | K.ASQVEKTPKVESKEKIVVKK<br>DKPGKVE.S        | 41.92 | 3007.73 | 2.2  |
| Microtubule-associated<br>protein 1B | sp P15205 MAP1B_RAT  | K.ATRGEKDKETKNAANASA<br>SKSVKTA.T          | 55.26 | 2691.38 | -0.8 |
| Microtubule-associated<br>protein 1B | sp P15205 MAP1B_RAT  | L.KDAKKEVKKDEKKEVKKEE<br>KEPKKEIKK.I       | 17.45 | 3424    | 0.4  |
| Microtubule-associated<br>protein 1B | sp P15205 MAP1B_RAT  | L.KKDEKPKKEEAKKEIKKEIK<br>KEEKKE.L         | 19.54 | 3224.87 | 0    |
| Microtubule-associated<br>protein 1B | sp P15205 MAP1B_RAT  | L.KKDEKPKKEEAKKEIKKEIK<br>KEEKKE.L.K       | 26.63 | 3337.95 | 0.6  |

|                                                      |                      |                                                           |       |         |      |
|------------------------------------------------------|----------------------|-----------------------------------------------------------|-------|---------|------|
| Microtubule-associated protein 1B                    | sp P15205 MAP1B_RAT  | L.SDTKKPAALKPKVAKKEEPTKKEPLA                              | 39.73 | 2760.61 | -2.2 |
| Microtubule-associated protein 1B                    | sp P15205 MAP1B_RAT  | S.M(+42.01)VDPEALAEQNLGKAL.K                              | 22.23 | 1852.96 | -0.9 |
| Microtubule-associated protein 1B                    | sp P15205 MAP1B_RAT  | S.M(+42.01)VDPEALAEQNLGKALK.K                             | 45.43 | 1981.06 | -2.4 |
| Microtubule-associated protein 1B                    | sp P15205 MAP1B_RAT  | T.RTPEVSGYTYEKTERS.R                                      | 28.8  | 2058.01 | -0.3 |
| Microtubule-associated protein 1B                    | sp P15205 MAP1B_RAT  | T.SSFPEPTTDDVSPSLHAEV.G.S                                 | 39.61 | 2070.94 | 0    |
| Microtubule-associated protein 1B                    | sp P15205 MAP1B_RAT  | Y.KHM(+15.99)DPPPAPM(+15.99)QDRSPSPRHPDVS.M               | 24.91 | 2610.21 | -0.9 |
| Microtubule-associated protein 1B                    | sp P15205 MAP1B_RAT  | Y.KHMDPPPAPMQDRSPSPRHPDVS.M                               | 34.81 | 2578.22 | -1.1 |
| Microtubule-associated protein 1B                    | tr F1LRL9 F1LRL9_RAT | A.SEKVQSLE.G                                              | 29.88 | 918.466 | -0.8 |
| Microtubule-associated protein 1B                    | tr F1LRL9 F1LRL9_RAT | D.PPPAPMQDRSPSPRHPDVS.M                                   | 31.13 | 2067    | -0.7 |
| Microtubule-associated protein 1B                    | tr F1LRL9 F1LRL9_RAT | K.E(-18.01)T(+79.97)PLKDAKKEVKKDEKKEVKKEE.K               | 23.69 | 2817.49 | 8.4  |
| Microtubule-associated protein 1B                    | tr F1LRL9 F1LRL9_RAT | K.KEVKKETPLKDAKKEVKKDEKKEVKKEE.K                          | 30.48 | 3367.93 | 0.8  |
| Microtubule-associated protein 1B                    | tr F1LRL9 F1LRL9_RAT | K.KSTPLSDTKKPAALKPKVAKKEEPTKKEPIAAGKLKDKGKV KVIKKEGKTTE.A | 31.82 | 5624.33 | -2.2 |
| Microtubule-associated protein 4                     | sp Q5M7W5 MAP4_RAT   | E.AEYDDIVGETVEKTEFIPLL.D                                  | 34.88 | 2377.19 | 2    |
| Microtubule-associated protein 4                     | sp Q5M7W5 MAP4_RAT   | E.PPPEIEGEIKRDFMAALE.A                                    | 32.61 | 2041.02 | 2.8  |
| Microtubule-associated protein 4                     | sp Q5M7W5 MAP4_RAT   | R.TSPSPSSAPALRPGPKTTPTISKATSPSTL.V                        | 19.62 | 3062.66 | 0.8  |
| Microtubule-associated protein 4                     | sp Q5M7W5 MAP4_RAT   | T.ADLRSKTTSSASSVKRNTTPTG.A                                | 17.47 | 2264.17 | 0.3  |
| Microtubule-associated protein 4                     | sp Q5M7W5 MAP4_RAT   | E.AEYDDIVGETVEKTE.F                                       | 40.96 | 1793.82 | -1.2 |
| Microtubule-associated protein RP/EB family member 1 | sp Q66HR2 MARE1_RAT  | L.SKPKPLGSGSAAPQRPIATQRTT.A                               | 43.06 | 2476.39 | -1.4 |
| Myc box-dependent-interacting protein 1              | tr D4ABS7 D4ABS7_RAT | M.A(+42.01)EMGSKGVTAGKIASNVQKKL.T.R                       | 27.66 | 2259.23 | 0.3  |
| Myelin basic protein S                               | sp P02688 MBP_RAT    | A.SDYKSAHKGFKGAYDAQGTLSKIFKLGGRDSRSGSPMARR                | 22.41 | 4330.21 | 1.7  |
| Myelin basic protein S                               | sp P02688 MBP_RAT    | A.STMDHARHGFLPRH.R                                        | 31.29 | 1660.8  | -1.3 |
| Myelin basic protein S                               | sp P02688 MBP_RAT    | A.STMDHARHGFLPRHRDTGILD.S                                 | 29.03 | 2431.19 | -3   |
| Myelin basic protein S                               | sp P02688 MBP_RAT    | D.AQGTLSKIFKLGGRDSRSGSPMARR                               | 20.13 | 2675.44 | 0.3  |
| Myelin basic protein S                               | sp P02688 MBP_RAT    | D.ENPVVHFFKNIVTPR.T                                       | 22.08 | 1795.97 | -0.3 |
| Myelin basic protein S                               | sp P02688 MBP_RAT    | D.SHTRTTHYGSLPQK.S                                        | 30.35 | 1611.81 | -0.9 |
| Myelin basic protein S                               | sp P02688 MBP_RAT    | D.SIGRFFSGDR.G                                            | 18.41 | 1140.57 | -1.3 |
| Myelin basic protein S                               | sp P02688 MBP_RAT    | D.SRSGSPMARR                                              | 24.12 | 1103.56 | -2.7 |
| Myelin basic protein S                               | sp P02688 MBP_RAT    | D.TGILDSIGR.F                                             | 29.56 | 930.513 | -0.8 |
| Myelin basic protein S                               | sp P02688 MBP_RAT    | D.TGILDSIGR.F.F                                           | 45.86 | 1077.58 | 0.1  |
| Myelin basic protein S                               | sp P02688 MBP_RAT    | D.TGILDSIGRFF.S                                           | 38.48 | 1224.65 | 0    |
| Myelin basic protein S                               | sp P02688 MBP_RAT    | D.TGILDSIGRFFSG.D                                         | 31.61 | 1368.7  | -1.8 |

|                        |                   |                                                  |       |         |       |
|------------------------|-------------------|--------------------------------------------------|-------|---------|-------|
| Myelin basic protein S | sp P02688 MBP_RAT | D.TGILDSIGRFFSGDR.G                              | 43.17 | 1639.83 | -1.7  |
| Myelin basic protein S | sp P02688 MBP_RAT | F.FKNIVTPR.T                                     | 34.17 | 973.571 | 0     |
| Myelin basic protein S | sp P02688 MBP_RAT | F.FKNIVTPRTPPPSQGKGR.G                           | 16.36 | 1979.11 | -0.2  |
| Myelin basic protein S | sp P02688 MBP_RAT | F.FKNIVTPRTPPPSQGKGRGLS.L                        | 22.34 | 2236.24 | 0.3   |
| Myelin basic protein S | sp P02688 MBP_RAT | F.FKNIVTPRTPPPSQGKGRGLS.LSR.F                    | 26.45 | 2592.46 | -1.1  |
| Myelin basic protein S | sp P02688 MBP_RAT | F.GYGGRASDYKSAHKGFKGAYDAQGTLSKIFKLGGRDSRSGSPMARR | 15.34 | 4891.48 | -3.5  |
| Myelin basic protein S | sp P02688 MBP_RAT | F.KNIVTPR.T                                      | 22.96 | 826.502 | 0.1   |
| Myelin basic protein S | sp P02688 MBP_RAT | F.KNIVTPRTPPPSQGKGRGL.S                          | 20.29 | 2002.14 | -0.2  |
| Myelin basic protein S | sp P02688 MBP_RAT | F.KNIVTPRTPPPSQGKGRGLS.L                         | 26.12 | 2089.18 | -0.6  |
| Myelin basic protein S | sp P02688 MBP_RAT | F.KNIVTPRTPPPSQGKGRGLSL.S.R                      | 33.12 | 2289.29 | -0.7  |
| Myelin basic protein S | sp P02688 MBP_RAT | F.KNIVTPRTPPPSQGKGRGLSL.SR.F                     | 21.58 | 2445.39 | -1.7  |
| Myelin basic protein S | sp P02688 MBP_RAT | F.LPRHRDTGILDSIGR.F                              | 42.54 | 1704.94 | -0.7  |
| Myelin basic protein S | sp P02688 MBP_RAT | F.LPRHRDTGILDSIGRF.F                             | 15.41 | 1852.01 | 0     |
| Myelin basic protein S | sp P02688 MBP_RAT | F.LPRHRDTGILDSIGRFFSGDR.G                        | 15.6  | 2414.26 | -1.6  |
| Myelin basic protein S | sp P02688 MBP_RAT | G.AYDAQGTLSKIFKLGGRDSRSGSPMARR                   | 16.05 | 3024.57 | -2.6  |
| Myelin basic protein S | sp P02688 MBP_RAT | G.FKGAYDAQGTLSKIFKLGGRDSRSGSPMARR                | 17.62 | 3356.75 | -0.8  |
| Myelin basic protein S | sp P02688 MBP_RAT | G.FLPRHRDTG.I                                    | 18.57 | 1097.57 | -1.1  |
| Myelin basic protein S | sp P02688 MBP_RAT | G.FLPRHRDTGILD.S                                 | 30.28 | 1438.77 | -1.6  |
| Myelin basic protein S | sp P02688 MBP_RAT | G.FLPRHRDTGILDSIGRF.F                            | 16.78 | 1999.08 | -2.8  |
| Myelin basic protein S | sp P02688 MBP_RAT | G.FLPRHRDTGILDSIGRFFSGDR.G                       | 32.03 | 2561.33 | -3.5  |
| Myelin basic protein S | sp P02688 MBP_RAT | G.GRASDYKSAHKGFKGAYDAQGTLSKIFKLGGRDSRSGSPMARR    | 17.92 | 4614.37 | -11.1 |
| Myelin basic protein S | sp P02688 MBP_RAT | G.GRDSRSGSPMARR                                  | 19.36 | 1431.71 | -0.5  |
| Myelin basic protein S | sp P02688 MBP_RAT | G.ILDSIGRF.F                                     | 35.08 | 919.513 | 0.2   |
| Myelin basic protein S | sp P02688 MBP_RAT | G.RDSRSGSPMARR                                   | 27.46 | 1374.69 | -0.1  |
| Myelin basic protein S | sp P02688 MBP_RAT | G.SKYLATASTMDH.A                                 | 28.72 | 1323.61 | -1.1  |
| Myelin basic protein S | sp P02688 MBP_RAT | G.SKYLATASTMDHAR.H                               | 22.17 | 1550.75 | -0.8  |
| Myelin basic protein S | sp P02688 MBP_RAT | G.SLPQKSQRTQDENPVVH.F                            | 47.63 | 1961.99 | -1.5  |
| Myelin basic protein S | sp P02688 MBP_RAT | G.SLPQKSQRTQDENPVVHF.F                           | 39.94 | 2109.06 | -2.6  |
| Myelin basic protein S | sp P02688 MBP_RAT | G.SLPQKSQRTQDENPVVHFF.K                          | 34.68 | 2256.13 | -1.5  |
| Myelin basic protein S | sp P02688 MBP_RAT | G.SLPQKSQRTQDENPVVHFFK.NIV.T                     | 43.3  | 2710.42 | -3.1  |
| Myelin basic protein S | sp P02688 MBP_RAT | G.SLPQKSQRTQDENPVVHFFK.NIVTPR.T                  | 54.93 | 3064.62 | -1.3  |
| Myelin basic protein S | sp P02688 MBP_RAT | G.TLSKIFKLG.G                                    | 26.91 | 1005.62 | 0.4   |
| Myelin basic protein S | sp P02688 MBP_RAT | G.TLSKIFKLGGRDSRSGSPMARR                         | 20.95 | 2419.32 | 0.3   |
| Myelin basic protein S | sp P02688 MBP_RAT | H.ARHGFLPR.H                                     | 32.11 | 952.536 | 0.1   |

|                        |                   |                                                               |       |         |      |
|------------------------|-------------------|---------------------------------------------------------------|-------|---------|------|
| Myelin basic protein S | sp P02688 MBP_RAT | H.ARHGFLPRHRD.T                                               | 23.11 | 1360.72 | 0.6  |
| Myelin basic protein S | sp P02688 MBP_RAT | H.ARHGFLPRHRDTGILD.S                                          | 18.36 | 1859.99 | 0.1  |
| Myelin basic protein S | sp P02688 MBP_RAT | H.ARHGFLPRHRDTGILDSIGR.F                                      | 21.51 | 2273.23 | -0.3 |
| Myelin basic protein S | sp P02688 MBP_RAT | H.ARHGFLPRHRDTGILDSIGRFFSGDR.G                                | 17.97 | 2982.54 | -0.7 |
| Myelin basic protein S | sp P02688 MBP_RAT | H.FFKNIVTPR.T                                                 | 42.39 | 1120.64 | -0.6 |
| Myelin basic protein S | sp P02688 MBP_RAT | H.GFLPRHRDTGILDSIGRFFSGDR.G                                   | 23.8  | 2618.35 | -0.7 |
| Myelin basic protein S | sp P02688 MBP_RAT | H.RDTGILDSIGR.F                                               | 29.04 | 1201.64 | -1   |
| Myelin basic protein S | sp P02688 MBP_RAT | H.RDTGILDSIGRFFSGDR.G                                         | 43.58 | 1910.96 | 0.1  |
| Myelin basic protein S | sp P02688 MBP_RAT | H.TRTTHYGSLPQK.S                                              | 26.33 | 1387.72 | -1.4 |
| Myelin basic protein S | sp P02688 MBP_RAT | I.GRFFSGDR.G                                                  | 27.71 | 940.452 | -0.8 |
| Myelin basic protein S | sp P02688 MBP_RAT | K.Q(-17.03)SRSPPLSH.A                                         | 16.5  | 990.488 | 0.2  |
| Myelin basic protein S | sp P02688 MBP_RAT | K.SAHKGFKGAYDAQGTLISKIFKLGGRDSRSGSPMARR                       | 17.03 | 3837    | 1.2  |
| Myelin basic protein S | sp P02688 MBP_RAT | K.SQRTQDENPVVH.F                                              | 25.46 | 1408.67 | -1.8 |
| Myelin basic protein S | sp P02688 MBP_RAT | K.SQRTQDENPVVHFFKNIVTPR.T                                     | 50.46 | 2511.3  | -0.4 |
| Myelin basic protein S | sp P02688 MBP_RAT | K.YLATASTM(+15.99)DHAR.H                                      | 24.93 | 1351.62 | -0.7 |
| Myelin basic protein S | sp P02688 MBP_RAT | L.PQKSQRTQDENPVVH.F                                           | 33.64 | 1761.88 | 0.4  |
| Myelin basic protein S | sp P02688 MBP_RAT | L.SKIFKLGGRDSR.S                                              | 15.62 | 1362.77 | 0.2  |
| Myelin basic protein S | sp P02688 MBP_RAT | L.SKIFKLGGRDSRSGSPMARR                                        | 16.02 | 2205.19 | -1   |
| Myelin basic protein S | sp P02688 MBP_RAT | M.A(+42.01)S(+79.97)QKRPSQRHGSKYLATASTMDH.A                   | 16.55 | 2678.24 | -1.7 |
| Myelin basic protein S | sp P02688 MBP_RAT | M.A(+42.01)S(+79.97)QKRPSQRHGSKYLATASTMDHAR.H                 | 36.41 | 2905.38 | -1.1 |
| Myelin basic protein S | sp P02688 MBP_RAT | M.A(+42.01)S(+79.97)QKRPSQRHGSKYLATASTMDHARHG.F               | 15.79 | 3099.46 | 1.3  |
| Myelin basic protein S | sp P02688 MBP_RAT | M.A(+42.01)S(+79.97)QKRPSQRHGSKYLATASTMDHARHGFLPRHRDTGILDSIGR | 17.93 | 4777.35 | 0.4  |
| Myelin basic protein S | sp P02688 MBP_RAT | M.A(+42.01)SQKRPS(+79.97)QRHGSKY(+79.97)LATASTMDHAR.H         | 16.07 | 2985.34 | 0.1  |
| Myelin basic protein S | sp P02688 MBP_RAT | M.A(+42.01)SQKRPS(+79.97)QRHGSKYLATA.S                        | 21.3  | 2107.03 | -0.8 |
| Myelin basic protein S | sp P02688 MBP_RAT | M.A(+42.01)SQKRPS(+79.97)QRHGSKYLATASTMDHARHGFLPRHRDTG.I      | 20.07 | 4179.02 | -3   |
| Myelin basic protein S | sp P02688 MBP_RAT | M.A(+42.01)SQKRPS(+79.97)QRHGSKYLATASTMDHARHGFLPRHRDTGILD.S   | 18.87 | 4520.21 | -4.9 |
| Myelin basic protein S | sp P02688 MBP_RAT | M.A(+42.01)SQKRPSQRHG.S                                       | 21.85 | 1292.67 | -1.3 |
| Myelin basic protein S | sp P02688 MBP_RAT | M.A(+42.01)SQKRPSQRHG(+79.97)KYLATASTMDHARHG                  | 27.04 | 3042.44 | -3.6 |
| Myelin basic protein S | sp P02688 MBP_RAT | M.A(+42.01)SQKRPSQRHGSKY.L                                    | 33.53 | 1670.86 | -0.8 |
| Myelin basic protein S | sp P02688 MBP_RAT | M.A(+42.01)SQKRPSQRHGSKY.L.A                                  | 30.56 | 1783.94 | 0.4  |
| Myelin basic protein S | sp P02688 MBP_RAT | M.A(+42.01)SQKRPSQRHGSKY.L.A.T                                | 27.47 | 1854.98 | -0.4 |

|                        |                   |                                                                        |       |         |      |
|------------------------|-------------------|------------------------------------------------------------------------|-------|---------|------|
| Myelin basic protein S | sp P02688 MBP_RAT | M.A(+42.01)SQKRPSQRHGSKY<br>LAT.A                                      | 28.49 | 1956.03 | -1.7 |
| Myelin basic protein S | sp P02688 MBP_RAT | M.A(+42.01)SQKRPSQRHGSKY<br>LATA.S                                     | 35.42 | 2027.07 | -0.8 |
| Myelin basic protein S | sp P02688 MBP_RAT | M.A(+42.01)SQKRPSQRHGSKY<br>LATAS.T                                    | 25.2  | 2114.1  | -2   |
| Myelin basic protein S | sp P02688 MBP_RAT | M.A(+42.01)SQKRPSQRHGSKY<br>LATAST.M                                   | 16.33 | 2215.15 | -0.1 |
| Myelin basic protein S | sp P02688 MBP_RAT | M.A(+42.01)SQKRPSQRHGSKY<br>LATASTM(+15.99)D.H                         | 19.99 | 2477.21 | -1   |
| Myelin basic protein S | sp P02688 MBP_RAT | M.A(+42.01)SQKRPSQRHGSKY<br>LATASTM(+15.99)DH.A                        | 28.69 | 2614.27 | 0.3  |
| Myelin basic protein S | sp P02688 MBP_RAT | M.A(+42.01)SQKRPSQRHGSKY<br>LATASTM(+15.99)DHA.R                       | 39.7  | 2685.3  | -0.2 |
| Myelin basic protein S | sp P02688 MBP_RAT | M.A(+42.01)SQKRPSQRHGSKY<br>LATASTM(+15.99)DHAR.H                      | 42.87 | 2841.41 | -1.2 |
| Myelin basic protein S | sp P02688 MBP_RAT | M.A(+42.01)SQKRPSQRHGSKY<br>LATASTM(+15.99)DHARH.G                     | 23.51 | 2978.46 | 0.4  |
| Myelin basic protein S | sp P02688 MBP_RAT | M.A(+42.01)SQKRPSQRHGSKY<br>LATASTM(+15.99)DHARHG.F                    | 18.15 | 3035.49 | -0.9 |
| Myelin basic protein S | sp P02688 MBP_RAT | M.A(+42.01)SQKRPSQRHGSKY<br>LATASTM(+15.99)DHARHGF.L                   | 24.74 | 3182.55 | -3.6 |
| Myelin basic protein S | sp P02688 MBP_RAT | M.A(+42.01)SQKRPSQRHGSKY<br>LATASTM(+15.99)DHARHGFLP<br>R.H            | 30.56 | 3548.79 | 4    |
| Myelin basic protein S | sp P02688 MBP_RAT | M.A(+42.01)SQKRPSQRHGSKY<br>LATASTM(+15.99)DHARHGFLP<br>RH.R           | 18.29 | 3685.85 | -2.7 |
| Myelin basic protein S | sp P02688 MBP_RAT | M.A(+42.01)SQKRPSQRHGSKY<br>LATASTM(+15.99)DHARHGFLP<br>RHRD.T         | 30.98 | 3956.98 | 3.9  |
| Myelin basic protein S | sp P02688 MBP_RAT | M.A(+42.01)SQKRPSQRHGSKY<br>LATASTM(+15.99)DHARHGFLP<br>RHRDTG.I       | 30.32 | 4115.05 | -1.7 |
| Myelin basic protein S | sp P02688 MBP_RAT | M.A(+42.01)SQKRPSQRHGSKY<br>LATASTM(+15.99)DHARHGFLP<br>RHRDTGILD.S    | 30.37 | 4456.24 | 0.9  |
| Myelin basic protein S | sp P02688 MBP_RAT | M.A(+42.01)SQKRPSQRHGSKY<br>LATASTM(+15.99)DHARHGFLP<br>RHRDTGILDSIG.R | 15.65 | 4713.38 | -3.5 |
| Myelin basic protein S | sp P02688 MBP_RAT | M.A(+42.01)SQKRPSQRHGSKY<br>LATASTM.D                                  | 17.73 | 2346.19 | -1.1 |
| Myelin basic protein S | sp P02688 MBP_RAT | M.A(+42.01)SQKRPSQRHGSKY<br>LATASTM.DH                                 | 21.05 | 2461.21 | -0.9 |
| Myelin basic protein S | sp P02688 MBP_RAT | M.A(+42.01)SQKRPSQRHGSKY<br>LATASTM.DH.A                               | 39.96 | 2598.27 | -1.2 |
| Myelin basic protein S | sp P02688 MBP_RAT | M.A(+42.01)SQKRPSQRHGSKY<br>LATASTM.DHA.R                              | 37.49 | 2669.31 | -1.2 |
| Myelin basic protein S | sp P02688 MBP_RAT | M.A(+42.01)SQKRPSQRHGSKY<br>LATASTM.DHAR.H                             | 41.6  | 2825.41 | -0.7 |
| Myelin basic protein S | sp P02688 MBP_RAT | M.A(+42.01)SQKRPSQRHGSKY<br>LATASTM.DHARH.G                            | 31.18 | 2962.47 | -0.1 |
| Myelin basic protein S | sp P02688 MBP_RAT | M.A(+42.01)SQKRPSQRHGSKY<br>LATASTM.DHARHG(-.98).F                     | 16.87 | 3018.51 | -6.8 |
| Myelin basic protein S | sp P02688 MBP_RAT | M.A(+42.01)SQKRPSQRHGSKY<br>LATASTM.DHARHG.F                           | 29.15 | 3019.49 | -0.4 |
| Myelin basic protein S | sp P02688 MBP_RAT | M.A(+42.01)SQKRPSQRHGSKY<br>LATASTM.DHARHGF.L                          | 38.07 | 3166.56 | -0.1 |
| Myelin basic protein S | sp P02688 MBP_RAT | M.A(+42.01)SQKRPSQRHGSKY<br>LATASTM.DHARHGFL.P                         | 24.09 | 3279.64 | -0.5 |

|                        |                   |                                                                          |       |         |       |
|------------------------|-------------------|--------------------------------------------------------------------------|-------|---------|-------|
| Myelin basic protein S | sp P02688 MBP_RAT | M.A(+42.01)SQRPSQRHGSKY<br>LATASMDHARHGFLPR.H                            | 31.13 | 3532.8  | -2.4  |
| Myelin basic protein S | sp P02688 MBP_RAT | M.A(+42.01)SQRPSQRHGSKY<br>LATASMDHARHGFLPRH.R                           | 40.89 | 3669.86 | -3.7  |
| Myelin basic protein S | sp P02688 MBP_RAT | M.A(+42.01)SQRPSQRHGSKY<br>LATASMDHARHGFLPRHR.D                          | 40.74 | 3825.96 | 1.8   |
| Myelin basic protein S | sp P02688 MBP_RAT | M.A(+42.01)SQRPSQRHGSKY<br>LATASMDHARHGFLPRHRD.<br>T                     | 27.36 | 3940.98 | -1.7  |
| Myelin basic protein S | sp P02688 MBP_RAT | M.A(+42.01)SQRPSQRHGSKY<br>LATASMDHARHGFLPRHRDT<br>.G                    | 17.24 | 4042.03 | -6    |
| Myelin basic protein S | sp P02688 MBP_RAT | M.A(+42.01)SQRPSQRHGSKY<br>LATASMDHARHGFLPRHRDT<br>G.I                   | 30.9  | 4099.05 | 0.5   |
| Myelin basic protein S | sp P02688 MBP_RAT | M.A(+42.01)SQRPSQRHGSKY<br>LATASMDHARHGFLPRHRDT<br>GIL.D                 | 28.42 | 4325.22 | -0.9  |
| Myelin basic protein S | sp P02688 MBP_RAT | M.A(+42.01)SQRPSQRHGSKY<br>LATASMDHARHGFLPRHRDT<br>GILD.S                | 34.06 | 4440.25 | -2.1  |
| Myelin basic protein S | sp P02688 MBP_RAT | M.A(+42.01)SQRPSQRHGSKY<br>LATASMDHARHGFLPRHRDT<br>GILDS.I               | 27.69 | 4527.28 | -1    |
| Myelin basic protein S | sp P02688 MBP_RAT | M.A(+42.01)SQRPSQRHGSKY<br>LATASMDHARHGFLPRHRDT<br>GILDSIG.R             | 33.05 | 4697.39 | -2.6  |
| Myelin basic protein S | sp P02688 MBP_RAT | M.A(+42.01)SQRPSQRHGSKY<br>LATASMDHARHGFLPRHRDT<br>GILDSIGRF.F           | 19.36 | 5000.56 | 0.8   |
| Myelin basic protein S | sp P02688 MBP_RAT | M.A(+42.01)SQRPSQRHGSKY<br>LATASMDHARHGFLPRHRDT<br>GILDSIGRFF.S          | 20    | 5147.62 | 0     |
| Myelin basic protein S | sp P02688 MBP_RAT | M.A(+42.01)SQRPSQRHGSKY<br>LATASMDHARHGFLPRHRDT<br>GILDSIGRFFSG.D        | 18.78 | 5291.68 | -2.3  |
| Myelin basic protein S | sp P02688 MBP_RAT | M.A(+42.01)SQRPSQRHGSKY<br>LATASMDHARHGFLPRHRDT<br>GILDSIGRFSGDRGAPKRG.S | 16.44 | 6129.13 | -0.3  |
| Myelin basic protein S | sp P02688 MBP_RAT | M.AS(+79.97)QKRPSQRHGSK(+<br>42.01)YLATASMDHA.R                          | 15.59 | 2749.28 | 1     |
| Myelin basic protein S | sp P02688 MBP_RAT | M.ASQK(+42.01)RPS(+79.97)QR<br>HGSKYLATASMDH(+15.99)DH.A                 | 17.93 | 2694.23 | 0.3   |
| Myelin basic protein S | sp P02688 MBP_RAT | M.ASQK(+42.01)RPSQRHGSKY(+<br>79.97)LATASMDHARHGFLP<br>RHRD.T            | 17.16 | 4020.95 | 0.8   |
| Myelin basic protein S | sp P02688 MBP_RAT | M.ASQK(+42.01)RPSQRHGSKY<br>LATASMDH(-.98).A                             | 35.87 | 2597.29 | -7.8  |
| Myelin basic protein S | sp P02688 MBP_RAT | M.ASQKRPSQRHGSK(+42.01)Y<br>LATASMDHAR(-.98).H                           | 29.06 | 2824.43 | -14.3 |
| Myelin basic protein S | sp P02688 MBP_RAT | N.PVVHFFKNIVTPR.T                                                        | 38    | 1552.89 | -1.8  |
| Myelin basic protein S | sp P02688 MBP_RAT | P.QKSQRT(+79.97)QDENPVVH<br>FFKNIVTPR.T                                  | 21.02 | 2847.42 | -8.2  |
| Myelin basic protein S | sp P02688 MBP_RAT | P.RHRDTGILD.S                                                            | 26.79 | 1081.56 | -0.8  |
| Myelin basic protein S | sp P02688 MBP_RAT | Q.DENPVVHFFKNIV.T                                                        | 44.64 | 1556.8  | -0.1  |
| Myelin basic protein S | sp P02688 MBP_RAT | Q.DENPVVHFFKNIVTPR.T                                                     | 45.91 | 1911    | -0.3  |
| Myelin basic protein S | sp P02688 MBP_RAT | Q.GTLSKIFKLGGRDSRSGSPM<br>ARR                                            | 23.5  | 2476.34 | -0.2  |



|                        |                    |                                             |       |         |      |
|------------------------|--------------------|---------------------------------------------|-------|---------|------|
| Myelin basic protein S | sp P02688 MBP_RAT  | Q.RTQDENPVVHFFKNIVTPR.T                     | 54.58 | 2296.21 | -2.4 |
| Myelin basic protein S | sp P02688 MBP_RAT  | Q.SRSPLPSH.A                                | 22.41 | 879.456 | -0.8 |
| Myelin basic protein S | sp P02688 MBP_RAT  | R.DTGILDSIGR.F                              | 39.36 | 1045.54 | -1   |
| Myelin basic protein S | sp P02688 MBP_RAT  | R.DTGILDSIGRFF.F                            | 43.71 | 1192.61 | -0.2 |
| Myelin basic protein S | sp P02688 MBP_RAT  | R.DTGILDSIGRFF.S                            | 37.82 | 1339.68 | -1.3 |
| Myelin basic protein S | sp P02688 MBP_RAT  | R.DTGILDSIGRFFSGDR.G                        | 30.43 | 1754.86 | -7.8 |
| Myelin basic protein S | sp P02688 MBP_RAT  | R.GAPKRGSGKVPWLKQSRSP<br>PSH.A              | 18.27 | 2469.37 | -1.7 |
| Myelin basic protein S | sp P02688 MBP_RAT  | R.GLSLSRF.S                                 | 26.23 | 778.434 | -0.5 |
| Myelin basic protein S | sp P02688 MBP_RAT  | R.HGFLPR.H                                  | 36.89 | 725.397 | 0.5  |
| Myelin basic protein S | sp P02688 MBP_RAT  | R.HGFLPRHRDTGILDSIGR.F                      | 28.62 | 2046.09 | -1.5 |
| Myelin basic protein S | sp P02688 MBP_RAT  | R.HGFLPRHRDTGILDSIGRFFS<br>GDR.G            | 42.9  | 2755.41 | -2.3 |
| Myelin basic protein S | sp P02688 MBP_RAT  | R.HGSKYLATASTM(+15.99)DH.<br>A              | 35.5  | 1533.69 | 0.3  |
| Myelin basic protein S | sp P02688 MBP_RAT  | R.HGSKYLATASTM(+15.99)DH<br>AR.H            | 42.45 | 1760.83 | 1.1  |
| Myelin basic protein S | sp P02688 MBP_RAT  | R.HGSKYLATASTM(+15.99)DH<br>ARHG.F          | 18.32 | 1954.91 | 2.7  |
| Myelin basic protein S | sp P02688 MBP_RAT  | R.HGSKYLATAASTMDH.A                         | 49.14 | 1517.69 | -1.1 |
| Myelin basic protein S | sp P02688 MBP_RAT  | R.HGSKYLATAASTMDHAR.H                       | 54.57 | 1744.83 | 0.7  |
| Myelin basic protein S | sp P02688 MBP_RAT  | R.HRDTGIL.D                                 | 21.73 | 810.435 | 0.1  |
| Myelin basic protein S | sp P02688 MBP_RAT  | R.HRDTGILD.S                                | 23.33 | 925.462 | 0.6  |
| Myelin basic protein S | sp P02688 MBP_RAT  | R.HRDTGILDS.I                               | 26.2  | 1012.49 | -0.1 |
| Myelin basic protein S | sp P02688 MBP_RAT  | R.HRDTGILDSIGR.F                            | 44.08 | 1338.7  | -0.9 |
| Myelin basic protein S | sp P02688 MBP_RAT  | R.HRDTGILDSIGRFFSGDR.G                      | 45.33 | 2048.02 | -2.6 |
| Myelin basic protein S | sp P02688 MBP_RAT  | R.HRDTGILDSIGRFFSGDRGAP<br>K.R              | 25.79 | 2401.23 | 1.2  |
| Myelin basic protein S | sp P02688 MBP_RAT  | R.TPPPSQGKGRGL.S                            | 35.41 | 1193.65 | 0.1  |
| Myelin basic protein S | sp P02688 MBP_RAT  | R.TPPPSQGKGRGLS.L                           | 31.93 | 1280.68 | -0.4 |
| Myelin basic protein S | sp P02688 MBP_RAT  | R.TPPPSQGKGRGLSLS.R                         | 21.14 | 1480.8  | -0.9 |
| Myelin basic protein S | sp P02688 MBP_RAT  | R.TTHYGSLPQKSQR.T                           | 30.7  | 1501.76 | 0.7  |
| Myelin basic protein S | sp P02688 MBP_RAT  | S.KIFKLGGRDSRSGSPMA.R                       | 19.81 | 1805.96 | -0.3 |
| Myelin basic protein S | sp P02688 MBP_RAT  | S.KIFKLGGRDSRSGSPMARR                       | 18.13 | 2118.16 | 0    |
| Myelin basic protein S | sp P02688 MBP_RAT  | T.M(+42.01)DHARHGFLPRHRD<br>TGILDSIGRFFSG.D | 16.63 | 3136.55 | -1   |
| Myelin basic protein S | sp P02688 MBP_RAT  | Y.GSLPQKSQRTQDENPVVH.F                      | 39.98 | 2019.01 | -1.1 |
| Myelin basic protein S | sp P02688 MBP_RAT  | Y.GSLPQKSQRTQDENPVVHF.F                     | 21.91 | 2166.08 | -1.9 |
| Myelin basic protein S | sp P02688 MBP_RAT  | Y.GSLPQKSQRTQDENPVVHFF.<br>K                | 16.77 | 2313.15 | -2.3 |
| Myelin basic protein S | sp P02688 MBP_RAT  | Y.KSAHKGFKGAYDAQGTLK.<br>I                  | 54.18 | 1993.04 | -1   |
| Myelin basic protein S | sp P02688 MBP_RAT  | Y.LATASTMDHARHGFLPRHR<br>DTGILDSIGR.F       | 16.66 | 3200.64 | 0    |
| Myelin protein P0      | sp P06907 MYP0_RAT | A.IVVYTDREYVYGA.VG.S                        | 24.26 | 1539.79 | -0.8 |
| Myelin protein P0      | sp P06907 MYP0_RAT | A.IVVYTDREYVYGA.VGSQVTL<br>H(-.98).C        | 31.82 | 2204.16 | -0.9 |

|                   |                    |                                                             |       |         |      |
|-------------------|--------------------|-------------------------------------------------------------|-------|---------|------|
| Myelin protein P0 | sp P06907 MYP0_RAT | A.KGQPYIDEV.G                                               | 34.56 | 1047.52 | -0.5 |
| Myelin protein P0 | sp P06907 MYP0_RAT | A.MLDHSRST.K                                                | 27.06 | 945.434 | -0.4 |
| Myelin protein P0 | sp P06907 MYP0_RAT | A.MLDHSRSTKAA.S                                             | 38.98 | 1215.6  | -1.1 |
| Myelin protein P0 | sp P06907 MYP0_RAT | A.MLDHSRSTKAAASEKKSKGL<br>GESRKDKK                          | 25.45 | 3001.61 | -3.8 |
| Myelin protein P0 | sp P06907 MYP0_RAT | A.SEKSKKGLGESRKDKK                                          | 29.39 | 1804.02 | -1   |
| Myelin protein P0 | sp P06907 MYP0_RAT | D.HS(+79.97)RSTKAAASEKKSK<br>GLG.E                          | 27.74 | 1850.94 | 0.1  |
| Myelin protein P0 | sp P06907 MYP0_RAT | D.HS(+79.97)RSTKAAASEKKSK<br>GLGESRKDKK                     | 19.04 | 2722.42 | -0.5 |
| Myelin protein P0 | sp P06907 MYP0_RAT | D.HSRSTKAAASEKKS(+79.97)K<br>GL(-.98).G                     | 25.06 | 1792.93 | 9.3  |
| Myelin protein P0 | sp P06907 MYP0_RAT | D.HSRSTKAAASEKKSGLG.E                                       | 45.96 | 1770.97 | -0.6 |
| Myelin protein P0 | sp P06907 MYP0_RAT | D.HSRSTKAAASEKKSGLGESR<br>KDKK                              | 35.94 | 2642.46 | -1.1 |
| Myelin protein P0 | sp P06907 MYP0_RAT | D.SSKRGRQTPVLYAM(+15.99)<br>LDHSRSTKAAASEKKSGLGES<br>RKDKK  | 21.64 | 4461.4  | 2.3  |
| Myelin protein P0 | sp P06907 MYP0_RAT | D.SSKRGRQTPVLYAMLDHSRS<br>TKAAASEKKSGLGESRKDKK              | 17.99 | 4445.4  | 1.1  |
| Myelin protein P0 | sp P06907 MYP0_RAT | E.KGKFHKSSKDSSKRGRQTPV<br>LY.A                              | 25.48 | 2533.39 | -1   |
| Myelin protein P0 | sp P06907 MYP0_RAT | F.HYAKGQPYIDEVGT.F                                          | 16.27 | 1576.75 | 0.2  |
| Myelin protein P0 | sp P06907 MYP0_RAT | F.HYAKGQPYIDEVGT.F.K                                        | 26.65 | 1723.82 | -1.9 |
| Myelin protein P0 | sp P06907 MYP0_RAT | G.RQTPVLYAMLDHSRSTKAA<br>SEKKSGLGESRKDKK                    | 22.99 | 3930.12 | 1.8  |
| Myelin protein P0 | sp P06907 MYP0_RAT | G.RQTPVLYAMLDHSRSTKAA<br>SEKKSGLGESRKDKK(-.98)              | 17.81 | 3929.14 | -6.1 |
| Myelin protein P0 | sp P06907 MYP0_RAT | H.SRSTKAAASEKKSGLG.E                                        | 39.06 | 1633.91 | -0.5 |
| Myelin protein P0 | sp P06907 MYP0_RAT | H.SRSTKAAASEKKSGLGESRK<br>DKK                               | 36.14 | 2505.4  | -0.6 |
| Myelin protein P0 | sp P06907 MYP0_RAT | K.GKFHKSSKDSSKRGRQTPVL<br>.Y                                | 28.72 | 2242.23 | -0.9 |
| Myelin protein P0 | sp P06907 MYP0_RAT | K.GKFHKSSKDSSKRGRQTPVL<br>Y.A                               | 35.37 | 2405.29 | -2.8 |
| Myelin protein P0 | sp P06907 MYP0_RAT | K.SKGLGESRKDKK                                              | 18.38 | 1331.75 | -0.3 |
| Myelin protein P0 | sp P06907 MYP0_RAT | K.SSKDSSKRGRQTPVLY.A                                        | 23.52 | 1807.95 | 0.4  |
| Myelin protein P0 | sp P06907 MYP0_RAT | K.SSKDSSKRGRQTPVLYAMD<br>HSRSTKAAASEKKSGLGESRK<br>DKK       | 30.46 | 4862.59 | -3.7 |
| Myelin protein P0 | sp P06907 MYP0_RAT | K.SSKDSSKRGRQTPVLYAMD<br>HSRSTKAAASEKKSGLGESRK<br>DKK(-.98) | 21.36 | 4861.61 | -4   |
| Myelin protein P0 | sp P06907 MYP0_RAT | L.YAM(+15.99)LDHSRSTKAAS<br>EKKSGLGESRKDKK                  | 19.56 | 3251.7  | -0.4 |
| Myelin protein P0 | sp P06907 MYP0_RAT | L.YAMLDHSRSTKAA.S                                           | 38.64 | 1449.7  | -2   |
| Myelin protein P0 | sp P06907 MYP0_RAT | L.YAMLDHSRSTKAAASEKKS<br>GLG.E                              | 15.79 | 2364.22 | -0.6 |
| Myelin protein P0 | sp P06907 MYP0_RAT | L.YAMLDHSRSTKAAASEKKS<br>GLGESRKDKK                         | 24.07 | 3235.71 | 0.1  |
| Myelin protein P0 | sp P06907 MYP0_RAT | M.LDHSRSTK.A                                                | 31.01 | 942.488 | -0.3 |
| Myelin protein P0 | sp P06907 MYP0_RAT | M.LDHSRSTKAA.S                                              | 27.97 | 1084.56 | -0.9 |
| Myelin protein P0 | sp P06907 MYP0_RAT | M.LDHSRSTKAAASEKKSGLG.<br>E                                 | 46.68 | 1999.08 | 0    |

|                   |                    |                                                      |       |         |      |
|-------------------|--------------------|------------------------------------------------------|-------|---------|------|
| Myelin protein P0 | sp P06907 MYP0_RAT | M.LDHSRSTKAASEKKSGLGE<br>SRKDKK                      | 25.96 | 2870.57 | -1.9 |
| Myelin protein P0 | sp P06907 MYP0_RAT | Q.TPVLVYAML DHSRSTKAASEK<br>KSKGLGESRKDKK            | 23.43 | 3645.96 | -1.8 |
| Myelin protein P0 | sp P06907 MYP0_RAT | R.GRQTPVLYAML DHSRSTKA<br>ASEKKSGLGESRKDKK           | 16.78 | 3987.14 | -0.3 |
| Myelin protein P0 | sp P06907 MYP0_RAT | R.STKAASEKKSGLGESRKDK<br>K                           | 32.86 | 2262.27 | -1   |
| Myelin protein P0 | sp P06907 MYP0_RAT | R.STKAASEKKSGLGESRKDK<br>K(+42.01)(-.98)             | 19.54 | 2303.29 | -0.4 |
| Myelin protein P0 | sp P06907 MYP0_RAT | R.YQPEGGRDAISIFHY.A                                  | 30.58 | 1751.83 | -1.1 |
| Myelin protein P0 | sp P06907 MYP0_RAT | S.KDSSKRGRQTPVLY.A                                   | 15.11 | 1633.89 | -1.8 |
| Myelin protein P0 | sp P06907 MYP0_RAT | S.SKDSSKRGRQTPVLYAML D<br>SRSTKAASEKKSGLGESRKD<br>KK | 25.05 | 4775.56 | -2   |
| Myelin protein P0 | sp P06907 MYP0_RAT | S.SKRGRQTPVLYAML DHSRST<br>KAASEKKSGLGESRKDKK        | 15.33 | 4358.37 | 2.6  |
| Myelin protein P0 | sp P06907 MYP0_RAT | T.KAASEKKSGLGESRKDKK                                 | 29.89 | 2074.19 | -0.4 |
| Myelin protein P0 | sp P06907 MYP0_RAT | V.GTFKERIQW.V                                        | 36.35 | 1163.61 | -0.5 |
| Myelin protein P0 | sp P06907 MYP0_RAT | V.LYAM(+15.99)LDHSRSTKAA<br>SEKKSGLGESRKDKK          | 30.56 | 3364.79 | 0.3  |
| Myelin protein P0 | sp P06907 MYP0_RAT | V.LYAML DHSRSTKAASEKKS<br>KGLGESRKDKK                | 17.95 | 3348.79 | 0.8  |
| Myelin protein P0 | sp P06907 MYP0_RAT | W.RYQPEGGRDAISIFH.Y                                  | 23.53 | 1744.86 | 1.9  |
| Myelin protein P0 | sp P06907 MYP0_RAT | W.RYQPEGGRDAISIFHY.A                                 | 22.53 | 1907.93 | -0.5 |
| Myelin protein P0 | sp P06907 MYP0_RAT | W.RYQPEGGRDAISIFHYA.K                                | 30.16 | 1978.96 | -0.9 |
| Myelin protein P0 | sp P06907 MYP0_RAT | W.RYQPEGGRDAISIFHYAKGQ<br>PYIDEV(-.98).G             | 18.79 | 3007.49 | -7.2 |
| Myelin protein P0 | sp P06907 MYP0_RAT | W.RYQPEGGRDAISIFHYAKGQ<br>PYIDEV.G                   | 33.85 | 3008.48 | 9.6  |
| Myelin protein P0 | sp P06907 MYP0_RAT | Y.AM(+15.99)LDHS(+79.97)RST<br>KAASEKKSGLGE          | 30.15 | 2297.12 | -2.1 |
| Myelin protein P0 | sp P06907 MYP0_RAT | Y.AM(+15.99)LDHSRST.K                                | 27.69 | 1032.47 | -0.5 |
| Myelin protein P0 | sp P06907 MYP0_RAT | Y.AM(+15.99)LDHSRSTK.A                               | 19.77 | 1160.56 | -0.8 |
| Myelin protein P0 | sp P06907 MYP0_RAT | Y.AM(+15.99)LDHSRSTKAA.S                             | 35.49 | 1302.64 | -0.3 |
| Myelin protein P0 | sp P06907 MYP0_RAT | Y.AM(+15.99)LDHSRSTKAASE<br>KKS(+79.97)KGL(-.98).G   | 15.03 | 2239.11 | 10.2 |
| Myelin protein P0 | sp P06907 MYP0_RAT | Y.AM(+15.99)LDHSRSTKAASE<br>KKS.K                    | 25.2  | 1861.93 | -0.6 |
| Myelin protein P0 | sp P06907 MYP0_RAT | Y.AM(+15.99)LDHSRSTKAASE<br>KKSGLGE                  | 41.52 | 2217.15 | -4   |
| Myelin protein P0 | sp P06907 MYP0_RAT | Y.AM(+15.99)LDHSRSTKAASE<br>KKSGLGE.S                | 21.08 | 2346.2  | -3   |
| Myelin protein P0 | sp P06907 MYP0_RAT | Y.AM(+15.99)LDHSRSTKAASE<br>KKSGLGESRKDK.K           | 27.2  | 2960.55 | -2.1 |
| Myelin protein P0 | sp P06907 MYP0_RAT | Y.AM(+15.99)LDHSRSTKAASE<br>KKSGLGESRKDKK            | 33.67 | 3088.64 | -2.2 |
| Myelin protein P0 | sp P06907 MYP0_RAT | Y.AMLDHSR.S                                          | 24.6  | 828.391 | -0.4 |
| Myelin protein P0 | sp P06907 MYP0_RAT | Y.AMLDHSRS(+79.97)TKAASE<br>KKSGLGE                  | 17.24 | 2281.13 | -0.1 |
| Myelin protein P0 | sp P06907 MYP0_RAT | Y.AMLDHSRS.T                                         | 21.86 | 915.423 | -0.4 |
| Myelin protein P0 | sp P06907 MYP0_RAT | Y.AMLDHSRST(+79.97)KAASE<br>KKSGLGESRKDKK            | 19.84 | 3152.61 | -0.1 |
| Myelin protein P0 | sp P06907 MYP0_RAT | Y.AMLDHSRST.K                                        | 32.91 | 1016.47 | -0.4 |

|                                                          |                      |                                                      |       |         |      |
|----------------------------------------------------------|----------------------|------------------------------------------------------|-------|---------|------|
| Myelin protein P0                                        | sp P06907 MYP0_RAT   | Y.AMLDHSRSTK.A                                       | 35.55 | 1144.57 | -0.7 |
| Myelin protein P0                                        | sp P06907 MYP0_RAT   | Y.AMLDHSRSTKAA.S                                     | 41.77 | 1286.64 | -1   |
| Myelin protein P0                                        | sp P06907 MYP0_RAT   | Y.AMLDHSRSTKAAASEK.K                                 | 41.64 | 1630.81 | -1.4 |
| Myelin protein P0                                        | sp P06907 MYP0_RAT   | Y.AMLDHSRSTKAAASEKK.S                                | 41.13 | 1758.9  | -0.7 |
| Myelin protein P0                                        | sp P06907 MYP0_RAT   | Y.AMLDHSRSTKAAASEKKS(+79.97)KGL(-.98).G              | 24.19 | 2223.12 | 8.5  |
| Myelin protein P0                                        | sp P06907 MYP0_RAT   | Y.AMLDHSRSTKAAASEKKS.K                               | 41.17 | 1845.94 | -1.1 |
| Myelin protein P0                                        | sp P06907 MYP0_RAT   | Y.AMLDHSRSTKAAASEKKS(+42.01)GLG(-.98).E              | 25.66 | 2242.19 | -0.8 |
| Myelin protein P0                                        | sp P06907 MYP0_RAT   | Y.AMLDHSRSTKAAASEKKS.KG.L                            | 23.7  | 2031.05 | -1   |
| Myelin protein P0                                        | sp P06907 MYP0_RAT   | Y.AMLDHSRSTKAAASEKKS.KGLG.E                          | 43.84 | 2201.16 | -1.4 |
| Myelin protein P0                                        | sp P06907 MYP0_RAT   | Y.AMLDHSRSTKAAASEKKS.KGLGESR.K                       | 47.08 | 2573.33 | -1.2 |
| Myelin protein P0                                        | sp P06907 MYP0_RAT   | Y.AMLDHSRSTKAAASEKKS.KGLGESRKDKK                     | 18.44 | 3072.65 | -2.2 |
| Myelin protein P0                                        | sp P06907 MYP0_RAT   | Y.QPEGGRDAISIFHY.A                                   | 21.08 | 1588.76 | -6.2 |
| Myelin protein P0                                        | sp P06907 MYP0_RAT   | Y.QPEGGRDAISIFHYA.K                                  | 19.73 | 1659.8  | -0.5 |
| Myelin protein P0                                        | sp P06907 MYP0_RAT   | K.AASEKKS.KGLGESRKDKK                                | 23.47 | 1946.09 | -0.6 |
| Myelin protein P0                                        | sp P06907 MYP0_RAT   | Y.AKGQPYIDEV.G                                       | 37.09 | 1118.56 | -0.6 |
| Myeloid-associated differentiation marker                | sp Q6VBQ5 MYADM_RAT  | M.PVTVTRTTITTTTS.S                                   | 27.82 | 1376.75 | -2.1 |
| Myeloperoxidase (Mapped)                                 | tr D3ZGE2 D3ZGE2_RAT | F.TNAFRYGHITLIQPF.M                                  | 20.06 | 1663.85 | -3.7 |
| Myocardial ischemic preconditioning associated protein 7 | tr Q1EG89 Q1EG89_RAT | M(+42.01)(+15.99)DDLDALLADLESTTSHISK.R.P             | 32.35 | 2388.15 | -2.2 |
| Myocardial ischemic preconditioning associated protein 7 | tr Q1EG89 Q1EG89_RAT | M(+42.01)DDLDALLADLESTTSHISK.R.P                     | 29.85 | 2372.15 | -2   |
| Myocardial ischemic preconditioning associated protein 7 | tr Q1EG89 Q1EG89_RAT | M(+42.01)DDLDALLADLESTTSHISK.R                       | 45.77 | 2216.05 | -1.2 |
| Myopalladin                                              | tr D4A7X7 D4A7X7_RAT | S.S(+42.01)PPTTSAT.I                                 | 20.68 | 802.371 | 11   |
| Myosin heavy polypeptide 9 non-muscle                    | tr G3V6P7 G3V6P7_RAT | F.VVTRRIVRKGTGDCS(+79.97)DEEVDGKADGADAKAAE           | 41.58 | 3397.59 | 0    |
| Myosin heavy polypeptide 9 non-muscle                    | tr G3V6P7 G3V6P7_RAT | F.VVTRRIVRKGTGDCSDEEVDGKADGADAKAAE                   | 32.03 | 3317.63 | 1.3  |
| Myosin light chain 1/3 skeletal muscle isoform           | sp P02600 MYL1_RAT   | L.SQVGDVLRALGTNPTNAEVKKV.L                           | 29.99 | 2295.25 | -0.8 |
| Myosin light chain 1/3 skeletal muscle isoform           | sp P02600 MYL1_RAT   | M.A(+42.01)PKKDVKKPAAAAPAPAPAPAPAKPKEEKID.L          | 32.69 | 3311.86 | 10.9 |
| Myosin light chain 1/3 skeletal muscle isoform           | sp P02600 MYL1_RAT   | M.A(+42.01)PKKDVKKPAAAAPAPAPAPAPAKPKEEKID.L.S        | 26.07 | 3424.94 | 11.4 |
| Myosin light chain 1/3 skeletal muscle isoform           | sp P02600 MYL1_RAT   | M.APK(+42.01)KDVKKPAAAAPAPAPAPAPAKPKEEKIDLSA IKIEF.S | 29.16 | 4213.39 | 10.2 |
| Myosin light polypeptide 6                               | sp Q64119 MYL6_RAT   | V.LDFEHLPLMLQTV.A                                    | 24.7  | 1588.8  | -0.9 |
| Myosin regulatory light chain 2 skeletal muscle isoform  | sp P04466 MLRS_RAT   | F.AAMGRLNVKNEELDAMMK EASGPIN.F                       | 41.18 | 2688.3  | 0.7  |

|                                                         |                      |                                                                      |       |         |      |
|---------------------------------------------------------|----------------------|----------------------------------------------------------------------|-------|---------|------|
| Myosin regulatory light chain 2 skeletal muscle isoform | sp P04466 MLRS_RAT   | F.SMFDQTIQEFKEA.F                                                    | 25.84 | 1700.77 | -1.4 |
| Myosin regulatory light chain 2 skeletal muscle isoform | sp P04466 MLRS_RAT   | F.TVIDQNRDGIIDKEDLRDTFA<br>AMGRLN.V                                  | 32.44 | 3075.54 | 0.2  |
| Myosin regulatory light chain 2 skeletal muscle isoform | sp P04466 MLRS_RAT   | Q.FLEELLTQCDR.F                                                      | 17.04 | 1466.71 | 1.3  |
| Myosin regulatory light chain 2 skeletal muscle isoform | sp P04466 MLRS_RAT   | Y.KNICYVITHGDAKDQE                                                   | 20.68 | 1832.87 | 0.1  |
| Myosin regulatory light polypeptide 9                   | sp Q64122 MYL9_RAT   | F.AMFDQSQIQEFKEA.F                                                   | 29.46 | 1670.76 | -2.9 |
| N(G) N(G)-dimethylarginine dimethylaminohydrolase 2     | sp Q6MG60 DDAH2_RAT  | M.G(+42.01)TPGEGLGRCSHALI<br>RGVPESL.A                               | 29    | 2247.14 | -0.3 |
| Neurofilament heavy polypeptide                         | tr F1LRZ7 F1LRZ7_RAT | D.KGLPQEPSKPKTEKAEKSSST<br>DQKDSQPSEKAPEDKAAKGDK                     | 26.31 | 4509.28 | -1.2 |
| Neurofilament heavy polypeptide                         | tr F1LRZ7 F1LRZ7_RAT | D.Q(-17.03)KDSQPSEKAPEDKAAKGD<br>K                                   | 27.9  | 2139.04 | -0.6 |
| Neurofilament heavy polypeptide                         | tr F1LRZ7 F1LRZ7_RAT | D.SQPSEKAPEDKAAKGDK                                                  | 23.27 | 1784.89 | -1.8 |
| Neurofilament heavy polypeptide                         | tr F1LRZ7 F1LRZ7_RAT | F.AGYIDKVRQLEAHNRSLEGE<br>AAALRQQQAGRAAMGEL.Y                        | 15.18 | 4007.05 | 9.8  |
| Neurofilament heavy polypeptide                         | tr F1LRZ7 F1LRZ7_RAT | F.GGADALLGAPFAPLHGGGSL<br>HY.A                                       | 16.41 | 2077.04 | -1.2 |
| Neurofilament heavy polypeptide                         | tr F1LRZ7 F1LRZ7_RAT | F.HSWARTSVSSVS.A                                                     | 16.01 | 1302.63 | -1.1 |
| Neurofilament heavy polypeptide                         | tr F1LRZ7 F1LRZ7_RAT | G.AARGQLRLEQEHLLEDIAHV<br>R.Q                                        | 32.14 | 2453.33 | -0.9 |
| Neurofilament heavy polypeptide                         | tr F1LRZ7 F1LRZ7_RAT | G.AGGTRSAAGSSSGFHSWART<br>SVSSVS.A                                   | 29.26 | 2496.17 | -3.8 |
| Neurofilament heavy polypeptide                         | tr F1LRZ7 F1LRZ7_RAT | G.APFAPLHGGGSLHY.A                                                   | 38.62 | 1422.7  | -1   |
| Neurofilament heavy polypeptide                         | tr F1LRZ7 F1LRZ7_RAT | G.APFAPLHGGGSLHYALS.R                                                | 21.49 | 1693.86 | -0.7 |
| Neurofilament heavy polypeptide                         | tr F1LRZ7 F1LRZ7_RAT | G.APFAPLHGGGSLHYALS<br>RKA<br>G.A                                    | 19.33 | 2106.11 | 1.1  |
| Neurofilament heavy polypeptide                         | tr F1LRZ7 F1LRZ7_RAT | G.APFAPLHGGGSLHYALS<br>RKA<br>GAGGTRSAAGSSSGFHSWART<br>SVSSVS.A      | 24.99 | 4584.28 | 0.7  |
| Neurofilament heavy polypeptide                         | tr F1LRZ7 F1LRZ7_RAT | G.G(+42.01)SLHYALS<br>RKA<br>GAGGTRSAAGSSS(+79.97)GFHS(+79.97)WART.S | 16.24 | 3392.52 | -0.2 |
| Neurofilament heavy polypeptide                         | tr F1LRZ7 F1LRZ7_RAT | H.GGGSLHYALS.R.K                                                     | 41.13 | 1116.57 | -1   |
| Neurofilament heavy polypeptide                         | tr F1LRZ7 F1LRZ7_RAT | H.GGGSLHYALS<br>RKA<br>GAGGTR.S                                      | 30.03 | 1814.95 | 0.5  |
| Neurofilament heavy polypeptide                         | tr F1LRZ7 F1LRZ7_RAT | H.GGGSLHYALS<br>RKA<br>GAGGTRSAAGSSSGFHSWARTSVSSVS.A                 | 34.09 | 3850.88 | 0.1  |
| Neurofilament heavy polypeptide                         | tr F1LRZ7 F1LRZ7_RAT | H.YALS<br>RKA<br>GAGGTRSAAGSSSGFHSWARTSVSSVS.A                       | 21.75 | 3342.65 | -1   |
| Neurofilament heavy polypeptide                         | tr F1LRZ7 F1LRZ7_RAT | L.GAPFAPLHGGGSLH.Y                                                   | 28.68 | 1316.66 | -1.7 |
| Neurofilament heavy polypeptide                         | tr F1LRZ7 F1LRZ7_RAT | L.GAPFAPLHGGGSLH.Y.A                                                 | 36.6  | 1479.73 | -1.6 |

|                                 |                      |                                                                             |       |         |       |
|---------------------------------|----------------------|-----------------------------------------------------------------------------|-------|---------|-------|
| Neurofilament heavy polypeptide | tr F1LRZ7 F1LRZ7_RAT | L.GAPFAPLHGGGSLHYALSRKAGAGGTR.S                                             | 17.9  | 2605.36 | 1.8   |
| Neurofilament heavy polypeptide | tr F1LRZ7 F1LRZ7_RAT | L.HGGGSLHYALSRKAGAGGTR.S                                                    | 22.36 | 1952.01 | 1     |
| Neurofilament heavy polypeptide | tr F1LRZ7 F1LRZ7_RAT | M(+42.01)(+15.99)MSFGGADALLGAPFAPLHGGGSLHY.A                                | 42.93 | 2631.22 | -2.4  |
| Neurofilament heavy polypeptide | tr F1LRZ7 F1LRZ7_RAT | M(+42.01)MSFGGADALL.G                                                       | 30.43 | 1153.51 | -1.1  |
| Neurofilament heavy polypeptide | tr F1LRZ7 F1LRZ7_RAT | M(+42.01)MSFGGADALLGAPFAPLH.G                                               | 29.29 | 1943.93 | -0.6  |
| Neurofilament heavy polypeptide | tr F1LRZ7 F1LRZ7_RAT | M(+42.01)MSFGGADALLGAPFAPLHGGGSLH.Y                                         | 42.45 | 2452.17 | -2.7  |
| Neurofilament heavy polypeptide | tr F1LRZ7 F1LRZ7_RAT | M(+42.01)MSFGGADALLGAPFAPLHGGGSLHY.A                                        | 59.01 | 2615.23 | -3.2  |
| Neurofilament heavy polypeptide | tr F1LRZ7 F1LRZ7_RAT | M(+42.01)MSFGGADALLGAPFAPLHGGGSLHYALSR.K                                    | 51.99 | 3042.48 | -1.8  |
| Neurofilament heavy polypeptide | tr F1LRZ7 F1LRZ7_RAT | M(+42.01)MSFGGADALLGAPFAPLHGGGSLHYALSRKAGAGGTRSAAGSSSGFHSWARTSVSSV.S.A      | 35.95 | 5776.8  | 3.4   |
| Neurofilament heavy polypeptide | tr F1LRZ7 F1LRZ7_RAT | M.S(+42.01)FGGADALLGAPFAPLH.G                                               | 26.87 | 1681.85 | -0.1  |
| Neurofilament heavy polypeptide | tr F1LRZ7 F1LRZ7_RAT | M.S(+42.01)FGGADALLGAPFAPLHGGGSLH.Y                                         | 30.14 | 2190.09 | 0     |
| Neurofilament heavy polypeptide | tr F1LRZ7 F1LRZ7_RAT | M.S(+42.01)FGGADALLGAPFAPLHGGGSLHY.A                                        | 58.41 | 2353.15 | -1.7  |
| Neurofilament heavy polypeptide | tr F1LRZ7 F1LRZ7_RAT | M.S(+42.01)FGGADALLGAPFAPLHGGGSLHYA.L                                       | 37.46 | 2424.19 | -3.8  |
| Neurofilament heavy polypeptide | tr F1LRZ7 F1LRZ7_RAT | M.S(+42.01)FGGADALLGAPFAPLHGGGSLHYAL.S                                      | 30.4  | 2537.27 | -2.9  |
| Neurofilament heavy polypeptide | tr F1LRZ7 F1LRZ7_RAT | M.S(+42.01)FGGADALLGAPFAPLHGGGSLHYAL.S.R                                    | 39.03 | 2624.3  | -11.4 |
| Neurofilament heavy polypeptide | tr F1LRZ7 F1LRZ7_RAT | M.S(+42.01)FGGADALLGAPFAPLHGGGSLHYALSR.K                                    | 29.34 | 2780.4  | -1.4  |
| Neurofilament heavy polypeptide | tr F1LRZ7 F1LRZ7_RAT | M.S(+42.01)FGGADALLGAPFAPLHGGGSLHYALSRKAGAGGTRSAAGSSSGFHSWARTSVSSVS(-.98).A | 19.56 | 5513.74 | -0.2  |
| Neurofilament heavy polypeptide | tr F1LRZ7 F1LRZ7_RAT | M.S(+42.01)FGGADALLGAPFAPLHGGGSLHYALSRKAGAGGTRSAAGSSSGFHSWARTSVSSVS.A       | 34.45 | 5514.72 | 0.5   |
| Neurofilament heavy polypeptide | tr F1LRZ7 F1LRZ7_RAT | MMS(+79.97)FGGADALLGAPFAPLH.G                                               | 21.05 | 1981.88 | 9.3   |
| Neurofilament heavy polypeptide | tr F1LRZ7 F1LRZ7_RAT | P.FAPLHGGGSLHY.A                                                            | 33.33 | 1254.61 | -1    |
| Neurofilament heavy polypeptide | tr F1LRZ7 F1LRZ7_RAT | P.FAPLHGGGSLHYALSRKAGAGGTR.S                                                | 31.69 | 2380.25 | 0.5   |
| Neurofilament heavy polypeptide | tr F1LRZ7 F1LRZ7_RAT | R.EIRAQLEGHTVQ.S                                                            | 33.6  | 1379.72 | -0.8  |
| Neurofilament heavy polypeptide | tr F1LRZ7 F1LRZ7_RAT | R.KAGAGGTRSAAGSSSGFHSWARTSVSSVS.A                                           | 24.77 | 2752.33 | -3.3  |
| Neurofilament heavy polypeptide | tr F1LRZ7 F1LRZ7_RAT | R.SAAGSSSGFHSWAR.T                                                          | 46.9  | 1406.63 | -0.6  |
| Neurofilament heavy polypeptide | tr F1LRZ7 F1LRZ7_RAT | R.SAAGSSSGFHSWARTSVSSV.S.A                                                  | 22.6  | 2053.95 | -0.3  |
| Neurofilament heavy polypeptide | tr F1LRZ7 F1LRZ7_RAT | S.KKPEEKPKMEAKAKEEDKGLPQEPSKPKTEKAEKSSSTDQKDSQPSEKAPEDKAAKGDK               | 18.58 | 6505.31 | 1.3   |
| Neurofilament heavy polypeptide | tr F1LRZ7 F1LRZ7_RAT | S.RKAGAGGTRSAAGSSSGFHSWARTSVSSVS.A                                          | 25.15 | 2908.43 | -0.7  |

|                                 |                      |                                                            |       |         |       |
|---------------------------------|----------------------|------------------------------------------------------------|-------|---------|-------|
| Neurofilament heavy polypeptide | tr F1LRZ7 F1LRZ7_RAT | Y.ALSRKAGAGGTRSAAGSSSG FHS.W                               | 29.21 | 2119.05 | -2.4  |
| Neurofilament heavy polypeptide | tr F1LRZ7 F1LRZ7_RAT | Y.ALSRKAGAGGTRSAAGSSSG FHSWAR.T                            | 26.85 | 2532.27 | -0.2  |
| Neurofilament heavy polypeptide | tr F1LRZ7 F1LRZ7_RAT | Y.ALSRKAGAGGTRSAAGSSSG FHSWARTS.V                          | 15.41 | 2720.35 | 0.9   |
| Neurofilament heavy polypeptide | tr F1LRZ7 F1LRZ7_RAT | Y.ALSRKAGAGGTRSAAGSSSG FHSWARTSVSSVS(-.98).A               | 19.63 | 3178.6  | 4     |
| Neurofilament heavy polypeptide | tr F1LRZ7 F1LRZ7_RAT | Y.ALSRKAGAGGTRSAAGSSSG FHSWARTSVSSVS.A                     | 39.64 | 3179.58 | -3.2  |
| Neurofilament light polypeptide | sp P19527 NFL_RAT    | A.E(+42.01)GRLMEARK(+42.01) GADEAALARAEL.E                 | 18.62 | 2340.19 | -5.9  |
| Neurofilament light polypeptide | sp P19527 NFL_RAT    | A.FPAYYTSHVQEEQ.S                                          | 33.21 | 1597.7  | -0.7  |
| Neurofilament light polypeptide | sp P19527 NFL_RAT    | A.FPAYYTSHVQEEQSEVEETIE ATK.A                              | 30.81 | 2814.29 | -3.2  |
| Neurofilament light polypeptide | sp P19527 NFL_RAT    | A.FPAYYTSHVQEEQSEVEETIE ATKAEEAK.D                         | 30.65 | 3342.54 | 6.3   |
| Neurofilament light polypeptide | sp P19527 NFL_RAT    | A.RAFPAYYTSHVQE.E                                          | 38.86 | 1567.74 | -0.6  |
| Neurofilament light polypeptide | sp P19527 NFL_RAT    | A.RAFPAYYTSHVQEEQSEVEE TIEATK.A                            | 53.2  | 3041.43 | -3.2  |
| Neurofilament light polypeptide | sp P19527 NFL_RAT    | A.RAFPAYYTSHVQEEQSEVEE TIEATKAEEAK(-.98).D                 | 31.73 | 3568.7  | -6.2  |
| Neurofilament light polypeptide | sp P19527 NFL_RAT    | A.RAFPAYYTSHVQEEQSEVEE TIEATKAEEAK.D                       | 30.26 | 3569.68 | -3.6  |
| Neurofilament light polypeptide | sp P19527 NFL_RAT    | A.YYTSHVQEEQSEVEETIEAT KAEEAK.D                            | 24.8  | 3027.38 | -0.7  |
| Neurofilament light polypeptide | sp P19527 NFL_RAT    | C.RGMNEALEKQLQELEDKQN ADISAMQDTINKLENLRSTKS EMAR.Y         | 33.48 | 5204.55 | -10.4 |
| Neurofilament light polypeptide | sp P19527 NFL_RAT    | D.AKEEEGGEGEEEDTKESSEE EKKEESAGEEQAAKKKD                   | 42.32 | 4124.81 | -0.8  |
| Neurofilament light polypeptide | sp P19527 NFL_RAT    | D.TKESEEEEKKEESAGEEQAA KKKD                                | 46.27 | 2736.29 | -0.5  |
| Neurofilament light polypeptide | sp P19527 NFL_RAT    | E.AAKDESEDAKEEEGGEGEEEE DT(+79.97)KESEEEEKKEESAG EEQAAKKKD | 36.39 | 5050.12 | -0.6  |
| Neurofilament light polypeptide | sp P19527 NFL_RAT    | E.AAKDESEDAKEEEGGEGEEEE DTKESEEEEKKEESAGEEQAA KKKD         | 17.06 | 4970.16 | -2.5  |
| Neurofilament light polypeptide | sp P19527 NFL_RAT    | E.DAKEEEGGEGEEEDTKESSEE BEKKEESAGEEQAAKKKD                 | 24.57 | 4239.84 | 0.2   |
| Neurofilament light polypeptide | sp P19527 NFL_RAT    | E.EQSEVEETIEATKAEEAK.D                                     | 49.26 | 2019.95 | -1.1  |
| Neurofilament light polypeptide | sp P19527 NFL_RAT    | E.NLDLSQVA AISNDLK.S                                       | 17.64 | 1599.85 | -1    |
| Neurofilament light polypeptide | sp P19527 NFL_RAT    | E.TIEATKAEEAK.D                                            | 40.23 | 1189.62 | -0.6  |
| Neurofilament light polypeptide | sp P19527 NFL_RAT    | E.TPRVHISSVR.S                                             | 24.4  | 1150.66 | 0.4   |
| Neurofilament light polypeptide | sp P19527 NFL_RAT    | E.TPRVHISSVRSG.Y                                           | 24.16 | 1294.71 | -0.2  |
| Neurofilament light polypeptide | sp P19527 NFL_RAT    | E.TPRVHISSVRSGYS.T                                         | 15.82 | 1544.81 | -1.3  |
| Neurofilament light polypeptide | sp P19527 NFL_RAT    | E.TPRVHISSVRSGYSTA.R                                       | 22.9  | 1716.89 | -0.2  |
| Neurofilament light polypeptide | sp P19527 NFL_RAT    | E.TPRVHISSVRSGYSTAR.S                                      | 31.5  | 1872.99 | -0.2  |
| Neurofilament light polypeptide | sp P19527 NFL_RAT    | E.TPRVHISSVRSGYSTARS.A                                     | 24.12 | 1960.02 | -1.6  |

|                                 |                   |                                                        |       |         |      |
|---------------------------------|-------------------|--------------------------------------------------------|-------|---------|------|
| Neurofilament light polypeptide | sp P19527 NFL_RAT | E.TPRVHISSVRSGYSTARSAY.S                               | 18.74 | 2194.12 | 0.2  |
| Neurofilament light polypeptide | sp P19527 NFL_RAT | E.TPRVHISSVRSGYSTARSAYS.S                              | 26.64 | 2531.25 | -0.6 |
| Neurofilament light polypeptide | sp P19527 NFL_RAT | F.GRSAYSGLQ.S                                          | 25.13 | 937.462 | -1   |
| Neurofilament light polypeptide | sp P19527 NFL_RAT | F.GRSAYSGLQSSSY.L                                      | 35.34 | 1361.62 | -1.4 |
| Neurofilament light polypeptide | sp P19527 NFL_RAT | F.GRSAYSGLQSSSYLMSA(-.98).R                            | 21.06 | 1762.83 | 10.8 |
| Neurofilament light polypeptide | sp P19527 NFL_RAT | F.GRSAYSGLQSSSYLMSA.R                                  | 37.92 | 1763.81 | 1.3  |
| Neurofilament light polypeptide | sp P19527 NFL_RAT | F.GRSAYSGLQSSSYLMSAR.A                                 | 38.39 | 1919.92 | -0.8 |
| Neurofilament light polypeptide | sp P19527 NFL_RAT | F.GRSAYSGLQSSSYLMSARAF.PAYYTSHVQEEQSEVEETIEAT.KAEEAK.D | 36.76 | 5315.48 | -1.4 |
| Neurofilament light polypeptide | sp P19527 NFL_RAT | F.IERVHELEQQNKVLEAELLV.LRQKHSEPSR.F                    | 23.35 | 3606.96 | 1    |
| Neurofilament light polypeptide | sp P19527 NFL_RAT | F.SYEPYFSTSYKRRY.V                                     | 34.56 | 1845.87 | 0.5  |
| Neurofilament light polypeptide | sp P19527 NFL_RAT | G.GEGEEEDTKESEEEKKEES.AGEEQAAKKKD                      | 16.2  | 3481.53 | 0.1  |
| Neurofilament light polypeptide | sp P19527 NFL_RAT | G.SITSGYSQSSQVFGR.S                                    | 48.49 | 1602.76 | -3.4 |
| Neurofilament light polypeptide | sp P19527 NFL_RAT | G.SITSGYSQSSQVFGRSA.Y                                  | 49.99 | 1760.83 | 0.1  |
| Neurofilament light polypeptide | sp P19527 NFL_RAT | G.SITSGYSQSSQVFGRSAYSGL.Q.S                            | 51.31 | 2309.09 | 4.4  |
| Neurofilament light polypeptide | sp P19527 NFL_RAT | G.SLM(+15.99)PSLENLDLSQVA.AISNDLK.S                    | 47.59 | 2373.21 | -4.4 |
| Neurofilament light polypeptide | sp P19527 NFL_RAT | G.SLMPSLENLDLSQ.V                                      | 27.78 | 1445.71 | -0.5 |
| Neurofilament light polypeptide | sp P19527 NFL_RAT | G.SLMPSLENLDLSQVA AISNDLK.S                            | 55.15 | 2357.21 | -7.6 |
| Neurofilament light polypeptide | sp P19527 NFL_RAT | H.VQEEQSEVEETIEATK.A                                   | 55.2  | 1847.86 | -1.6 |
| Neurofilament light polypeptide | sp P19527 NFL_RAT | H.VQEEQSEVEETIEATKAEEA.K.D                             | 37.36 | 2376.12 | -1.7 |
| Neurofilament light polypeptide | sp P19527 NFL_RAT | K.SIRTQEKAQLQDLNDR.F                                   | 26.35 | 1913.99 | -0.9 |
| Neurofilament light polypeptide | sp P19527 NFL_RAT | L.DLSQVA AISNDLK.S                                     | 21.51 | 1372.72 | -2.8 |
| Neurofilament light polypeptide | sp P19527 NFL_RAT | L.MPSLENLDLSQVA AISNDLK.S                              | 39.74 | 2157.1  | -1   |
| Neurofilament light polypeptide | sp P19527 NFL_RAT | L.SQVA AISNDLK.S                                       | 19.85 | 1144.61 | 0.6  |
| Neurofilament light polypeptide | sp P19527 NFL_RAT | M.PSLENLDLSQVA AISNDLK.S                               | 46.59 | 2026.06 | -1.9 |
| Neurofilament light polypeptide | sp P19527 NFL_RAT | M.S(+42.01)SFSYEPYFSTSYKR.R                            | 41.69 | 1889.85 | -2.7 |
| Neurofilament light polypeptide | sp P19527 NFL_RAT | M.S(+42.01)SFSYEPYFSTSYKR.R.Y                          | 20.38 | 2045.95 | -2.3 |
| Neurofilament light polypeptide | sp P19527 NFL_RAT | M.S(+42.01)SFSYEPYFSTSYKR.RY.V                         | 26.04 | 2209.01 | -0.9 |
| Neurofilament light polypeptide | sp P19527 NFL_RAT | M.S(+42.01)SFSYEPYFSTSYKR.RYVE.T                       | 24.71 | 2437.12 | -2.8 |
| Neurofilament light polypeptide | sp P19527 NFL_RAT | M.S(+42.01)SFSYEPYFSTSYKR.RYVETPR.V                    | 16.28 | 2791.32 | -3.3 |
| Neurofilament light polypeptide | sp P19527 NFL_RAT | M.S(+42.01)SFSYEPYFSTSYKR.RYVETPRVH.I                  | 26.02 | 3027.45 | -0.5 |



|                                 |                   |                                                          |       |         |      |
|---------------------------------|-------------------|----------------------------------------------------------|-------|---------|------|
| Neurofilament light polypeptide | sp P19527 NFL_RAT | M.S(+42.01)SFSYEPYFSTSYKR RYVETPRVHISSVR.S               | 15.42 | 3569.77 | 0.6  |
| Neurofilament light polypeptide | sp P19527 NFL_RAT | M.S(+42.01)SFSYEPYFSTSYKR RYVETPRVHISSVRSGYSTARS AYSSY.S | 28.96 | 4950.36 | 3.6  |
| Neurofilament light polypeptide | sp P19527 NFL_RAT | M.SARAFPAYY.T                                            | 18.36 | 1044.5  | -1.5 |
| Neurofilament light polypeptide | sp P19527 NFL_RAT | M.SARAFPAYYTSHVQEEQSEV EETIEATK(-.98).A                  | 33.36 | 3198.51 | -9.6 |
| Neurofilament light polypeptide | sp P19527 NFL_RAT | M.SARAFPAYYTSHVQEEQSEV EETIEATK.A                        | 41.95 | 3199.49 | 1.9  |
| Neurofilament light polypeptide | sp P19527 NFL_RAT | M.SARAFPAYYTSHVQEEQSEV EETIEATKAEAK(-.98).D              | 32.1  | 3726.76 | -6.3 |
| Neurofilament light polypeptide | sp P19527 NFL_RAT | M.SARAFPAYYTSHVQEEQSEV EETIEATKAEAK.D                    | 49.54 | 3727.75 | 2.6  |
| Neurofilament light polypeptide | sp P19527 NFL_RAT | M.SSFSYEPYFSTSYKRRY.V                                    | 18.16 | 2167    | -0.8 |
| Neurofilament light polypeptide | sp P19527 NFL_RAT | P.SLENLDLSQVA AISNDLK.S                                  | 46.97 | 1929.01 | -6.2 |
| Neurofilament light polypeptide | sp P19527 NFL_RAT | P.YFSTSYKRRY.V                                           | 17    | 1369.68 | -0.5 |
| Neurofilament light polypeptide | sp P19527 NFL_RAT | Q.SEVEETIEATK.A                                          | 24.77 | 1234.59 | -1.4 |
| Neurofilament light polypeptide | sp P19527 NFL_RAT | Q.SEVEETIEATKAEAK.D                                      | 56.99 | 1762.85 | -0.4 |
| Neurofilament light polypeptide | sp P19527 NFL_RAT | Q.SSSYLMSAR.A                                            | 33.33 | 1000.46 | -0.6 |
| Neurofilament light polypeptide | sp P19527 NFL_RAT | Q.SSSYLMSARAFPAY.Y                                       | 17.44 | 1549.72 | -2.2 |
| Neurofilament light polypeptide | sp P19527 NFL_RAT | Q.SSSYLMSARAFPAYY.T                                      | 29.6  | 1712.79 | 0.5  |
| Neurofilament light polypeptide | sp P19527 NFL_RAT | Q.SSSYLMSARAFPAYYTS.H                                    | 32.85 | 1900.87 | -0.1 |
| Neurofilament light polypeptide | sp P19527 NFL_RAT | Q.SSSYLMSARAFPAYYTSH.V                                   | 35.74 | 2037.93 | -0.6 |
| Neurofilament light polypeptide | sp P19527 NFL_RAT | Q.SSSYLMSARAFPAYYTSHVQ EEQSEVEETIEATK.A                  | 19.35 | 3867.78 | -0.5 |
| Neurofilament light polypeptide | sp P19527 NFL_RAT | Q.SSSYLMSARAFPAYYTSHVQ EEQSEVEETIEATKAEAK.D              | 46.12 | 4396.03 | 0.4  |
| Neurofilament light polypeptide | sp P19527 NFL_RAT | Q.VFGRSAYSGL                                             | 34.16 | 942.456 | 0.2  |
| Neurofilament light polypeptide | sp P19527 NFL_RAT | Q.VFGRSAYSGLQ.S                                          | 50.24 | 1183.6  | -0.5 |
| Neurofilament light polypeptide | sp P19527 NFL_RAT | R.AFPAYYTSHVQEEQSEVEETI EATK.A                           | 53.61 | 2885.32 | -2.8 |
| Neurofilament light polypeptide | sp P19527 NFL_RAT | R.AFPAYYTSHVQEEQSEVEETI EATKAEAK.D                       | 25.03 | 3413.58 | -1.3 |
| Neurofilament light polypeptide | sp P19527 NFL_RAT | R.RSYSSSSGSLMPSLENLDLSQ VAAISNDLK.S                      | 29.94 | 3168.56 | -3.8 |
| Neurofilament light polypeptide | sp P19527 NFL_RAT | R.RYVETPRVHISSVR.S                                       | 36.1  | 1697.93 | 0.3  |
| Neurofilament light polypeptide | sp P19527 NFL_RAT | R.SGYSTARSAY.S                                           | 27.92 | 1061.48 | 0.1  |
| Neurofilament light polypeptide | sp P19527 NFL_RAT | R.SGYSTARSAYSSY.S                                        | 41.72 | 1398.61 | -1.5 |
| Neurofilament light polypeptide | sp P19527 NFL_RAT | R.SGYSTARSAYSSYSAPVS.S                                   | 40.45 | 1839.83 | 0.8  |
| Neurofilament light polypeptide | sp P19527 NFL_RAT | R.YVETPRVHISSVR.S                                        | 36.67 | 1541.83 | -0.2 |
| Neurofilament light polypeptide | sp P19527 NFL_RAT | S.APVSSSLSVRRSYSSSSG.S                                   | 47.98 | 1812.9  | -2.1 |

|                                 |                   |                                          |       |         |      |
|---------------------------------|-------------------|------------------------------------------|-------|---------|------|
| Neurofilament light polypeptide | sp P19527 NFL_RAT | S.FSYEPYFSTSYKRRY.V                      | 30.03 | 1992.94 | 1.2  |
| Neurofilament light polypeptide | sp P19527 NFL_RAT | S.GSLMPLENLDLSQVAAISN DLK.S              | 53.74 | 2414.24 | 0.6  |
| Neurofilament light polypeptide | sp P19527 NFL_RAT | S.HVQEEQSEVEETIEATK.A                    | 59.99 | 1984.92 | -0.3 |
| Neurofilament light polypeptide | sp P19527 NFL_RAT | S.HVQEEQSEVEETIEATKAEEA K.D              | 71.43 | 2513.18 | -1.8 |
| Neurofilament light polypeptide | sp P19527 NFL_RAT | S.LENLDLSQVAAISNDLK.S                    | 44.2  | 1841.97 | -1.5 |
| Neurofilament light polypeptide | sp P19527 NFL_RAT | S.LMPLENLDLSQVAAISNDL K.S                | 44.84 | 2270.18 | -3.2 |
| Neurofilament light polypeptide | sp P19527 NFL_RAT | S.QVAAISNDLK.S                           | 33.71 | 1057.58 | -1.1 |
| Neurofilament light polypeptide | sp P19527 NFL_RAT | S.SGSLMPLENLDLSQVAAISN DLK.S             | 54.19 | 2501.27 | -2   |
| Neurofilament light polypeptide | sp P19527 NFL_RAT | S.SLSVRR.S                               | 18.13 | 716.429 | -0.5 |
| Neurofilament light polypeptide | sp P19527 NFL_RAT | S.SLSVRRS.Y                              | 19.64 | 803.461 | -0.3 |
| Neurofilament light polypeptide | sp P19527 NFL_RAT | S.SLSVRRSYSSSSG.S                        | 33.29 | 1371.67 | -1   |
| Neurofilament light polypeptide | sp P19527 NFL_RAT | S.SQVFGRSAYSGLQ.S                        | 25.49 | 1398.69 | -2.5 |
| Neurofilament light polypeptide | sp P19527 NFL_RAT | S.SSLSVRRSYSSSSG.S                       | 46.21 | 1458.71 | -1.4 |
| Neurofilament light polypeptide | sp P19527 NFL_RAT | T.PRVHISSVR.S                            | 30.57 | 1049.61 | -1   |
| Neurofilament light polypeptide | sp P19527 NFL_RAT | T.SGYSQSSQVFGR.S                         | 48.59 | 1301.6  | -1.4 |
| Neurofilament light polypeptide | sp P19527 NFL_RAT | T.SGYSQSSQVFGRSA.Y                       | 38.12 | 1459.67 | -1.1 |
| Neurofilament light polypeptide | sp P19527 NFL_RAT | T.SGYSQSSQVFGRSAY.S                      | 32.99 | 1622.73 | -1.4 |
| Neurofilament light polypeptide | sp P19527 NFL_RAT | T.SGYSQSSQVFGRSAYSGLQ(-.98).S            | 20.16 | 2006.94 | -1.9 |
| Neurofilament light polypeptide | sp P19527 NFL_RAT | T.SGYSQSSQVFGRSAYSGLQ.S                  | 59.27 | 2007.93 | -0.9 |
| Neurofilament light polypeptide | sp P19527 NFL_RAT | T.SGYSQSSQVFGRSAYSGLQS. S                | 49.73 | 2094.96 | -3.8 |
| Neurofilament light polypeptide | sp P19527 NFL_RAT | T.SGYSQSSQVFGRSAYSGLQS SSYLMSAR.A        | 22.56 | 2990.38 | -3   |
| Neurofilament light polypeptide | sp P19527 NFL_RAT | T.SHVQEEQSEVEETIEATKAEE AK.D             | 33.24 | 2600.21 | 0.4  |
| Neurofilament light polypeptide | sp P19527 NFL_RAT | V.ETPRVHISSVR.S                          | 20.77 | 1279.7  | 0    |
| Neurofilament light polypeptide | sp P19527 NFL_RAT | V.FGRSAYSGLQ.S                           | 15.69 | 1084.53 | -0.1 |
| Neurofilament light polypeptide | sp P19527 NFL_RAT | Y.EPYFSTSYKRRY.V                         | 28.03 | 1595.77 | 0.2  |
| Neurofilament light polypeptide | sp P19527 NFL_RAT | Y.FSTSYKRRYVETPRVHISSVR .S               | 19.9  | 2567.37 | 0.4  |
| Neurofilament light polypeptide | sp P19527 NFL_RAT | Y.KRRYVETPRVH.I                          | 34.25 | 1439.81 | 0.4  |
| Neurofilament light polypeptide | sp P19527 NFL_RAT | Y.KRRYVETPRVHISSVR.S                     | 20.77 | 1982.13 | 0.5  |
| Neurofilament light polypeptide | sp P19527 NFL_RAT | Y.LMSARAFPAYYTSHVQEEQS EVEETIEATKAEEAK.D | 25.45 | 3971.87 | -0.6 |
| Neurofilament light polypeptide | sp P19527 NFL_RAT | Y.SAPVSSLSVR.R                           | 44.43 | 1088.58 | -0.2 |

|                                 |                   |                                             |       |         |      |
|---------------------------------|-------------------|---------------------------------------------|-------|---------|------|
| Neurofilament light polypeptide | sp P19527 NFL_RAT | Y.SAPVSSSLSVRR.S                            | 46.23 | 1244.68 | -0.7 |
| Neurofilament light polypeptide | sp P19527 NFL_RAT | Y.SAPVSSSLSVRRS.Y                           | 24.76 | 1331.72 | -1   |
| Neurofilament light polypeptide | sp P19527 NFL_RAT | Y.SAPVSSSLSVRRSY.S                          | 27.52 | 1494.78 | -2   |
| Neurofilament light polypeptide | sp P19527 NFL_RAT | Y.SAPVSSSLSVRRSYSSSS.S                      | 38.42 | 1755.88 | -0.4 |
| Neurofilament light polypeptide | sp P19527 NFL_RAT | Y.SAPVSSSLSVRRSYSSSS.G                      | 15.24 | 1842.91 | -7.2 |
| Neurofilament light polypeptide | sp P19527 NFL_RAT | Y.SAPVSSSLSVRRSYSSSSG.S                     | 42.08 | 1899.93 | -0.6 |
| Neurofilament light polypeptide | sp P19527 NFL_RAT | Y.SQSSQVFRSAYSGLQ.S                         | 39.49 | 1700.81 | -0.2 |
| Neurofilament light polypeptide | sp P19527 NFL_RAT | Y.SSSSGSLMPLENLDLSQVA AISNDLK.S             | 51.88 | 2762.36 | -1.6 |
| Neurofilament light polypeptide | sp P19527 NFL_RAT | Y.SSYSAPVSSSLSVRR.S                         | 24.75 | 1581.81 | -1.9 |
| Neurofilament light polypeptide | sp P19527 NFL_RAT | Y.SSYSAPVSSSLSVRRS.Y                        | 26.26 | 1668.84 | -3.5 |
| Neurofilament light polypeptide | sp P19527 NFL_RAT | Y.SSYSAPVSSSLSVRRSY.S                       | 25.33 | 1831.91 | -1.2 |
| Neurofilament light polypeptide | sp P19527 NFL_RAT | Y.SSYSAPVSSSLSVRRSYSSSS G.S                 | 28.67 | 2237.06 | -1.4 |
| Neurofilament light polypeptide | sp P19527 NFL_RAT | Y.TSHVQEEQS(+79.97)EVEETI EATKAEAK.D        | 25.11 | 2781.22 | -2.6 |
| Neurofilament light polypeptide | sp P19527 NFL_RAT | Y.TSHVQEEQSEVEE.T                           | 20.7  | 1529.65 | -1.9 |
| Neurofilament light polypeptide | sp P19527 NFL_RAT | Y.TSHVQEEQSEVEETIE.A                        | 21.79 | 1872.82 | 0.1  |
| Neurofilament light polypeptide | sp P19527 NFL_RAT | Y.TSHVQEEQSEVEETIEATK(- .98).A              | 31.74 | 2172.02 | -7.7 |
| Neurofilament light polypeptide | sp P19527 NFL_RAT | Y.TSHVQEEQSEVEETIEATK.A                     | 34.7  | 2173    | -1.7 |
| Neurofilament light polypeptide | sp P19527 NFL_RAT | Y.TSHVQEEQSEVEETIEATKAE EAK(+42.01)(-.98).D | 32.81 | 2742.28 | -0.7 |
| Neurofilament light polypeptide | sp P19527 NFL_RAT | Y.TSHVQEEQSEVEETIEATKAE EAK.D               | 65.78 | 2701.26 | -0.4 |
| Neurofilament light polypeptide | sp P19527 NFL_RAT | Y.VETPRVHIS.S                               | 41.91 | 1036.57 | 0    |
| Neurofilament light polypeptide | sp P19527 NFL_RAT | Y.VETPRVHISS.V                              | 31.6  | 1123.6  | -1.5 |
| Neurofilament light polypeptide | sp P19527 NFL_RAT | Y.VETPRVHISSVR.S                            | 34.7  | 1378.77 | -1.6 |
| Neurofilament light polypeptide | sp P19527 NFL_RAT | Y.VETPRVHISSVRSG.Y                          | 44.49 | 1522.82 | -3.1 |
| Neurofilament light polypeptide | sp P19527 NFL_RAT | Y.VETPRVHISSVRSGYS.T                        | 40.77 | 1772.92 | 0    |
| Neurofilament light polypeptide | sp P19527 NFL_RAT | Y.VETPRVHISSVRSGYST.A                       | 26.31 | 1873.96 | -0.4 |
| Neurofilament light polypeptide | sp P19527 NFL_RAT | Y.VETPRVHISSVRSGYSTA.R                      | 48.51 | 1945    | -1.3 |
| Neurofilament light polypeptide | sp P19527 NFL_RAT | Y.VETPRVHISSVRSGYSTAR.S                     | 33.15 | 2101.1  | -1.3 |
| Neurofilament light polypeptide | sp P19527 NFL_RAT | Y.VETPRVHISSVRSGYSTAR.S. A                  | 34.19 | 2188.13 | 0.1  |
| Neurofilament light polypeptide | sp P19527 NFL_RAT | Y.VETPRVHISSVRSGYSTARSA .Y                  | 18.5  | 2259.17 | 0.4  |
| Neurofilament light polypeptide | sp P19527 NFL_RAT | Y.VETPRVHISSVRSGYSTARSA Y.S                 | 40.13 | 2422.24 | -1.3 |

|                                  |                      |                                              |       |         |      |
|----------------------------------|----------------------|----------------------------------------------|-------|---------|------|
| Neurofilament light polypeptide  | sp P19527 NFL_RAT    | Y.VETPRVHISSVRSGYSTARSA YSSY.S               | 20.2  | 2759.36 | -2.5 |
| Neurofilament light polypeptide  | sp P19527 NFL_RAT    | Y.YTSHVQEEQS(+79.97)EVEET IEATKAEEAK.D       | 24.55 | 2944.29 | 1.1  |
| Neurofilament light polypeptide  | sp P19527 NFL_RAT    | Y.YTSHVQEEQSEVEETIE.A                        | 19.72 | 2035.89 | -1.5 |
| Neurofilament light polypeptide  | sp P19527 NFL_RAT    | Y.YTSHVQEEQSEVEETIEATK.A                     | 40.55 | 2336.07 | -2.4 |
| Neurofilament light polypeptide  | sp P19527 NFL_RAT    | Y.YTSHVQEEQSEVEETIEATK AEEA.K                | 17.78 | 2736.22 | -4.5 |
| Neurofilament light polypeptide  | sp P19527 NFL_RAT    | Y.YTSHVQEEQSEVEETIEATK AEEAK(+42.01)(-.98).D | 27.05 | 2905.35 | -1   |
| Neurofilament light polypeptide  | sp P19527 NFL_RAT    | Y.YTSHVQEEQSEVEETIEATK AEEAK.D               | 45.12 | 2864.32 | -0.3 |
| Neurofilament medium polypeptide | sp P12839 NFM_RAT    | P.SAYRRVPTETRSSFSRVS.G                       | 15.85 | 2085.07 | -0.1 |
| Neurofilament medium polypeptide | sp P12839 NFM_RAT    | Y.QDTIQLENELRGTKWEMA R.H                     | 24.25 | 2445.21 | -5.3 |
| Neurofilament medium polypeptide | sp P12839 NFM_RAT    | Y.QDTIQLENELRGTKWEMA R.H.L                   | 18.86 | 2582.27 | 2.3  |
| Neurofilament medium polypeptide | tr G3V7S2 G3V7S2_RAT | A.IVKEVTQGD                                  | 24.58 | 987.524 | -0.1 |
| Neurofilament medium polypeptide | tr G3V7S2 G3V7S2_RAT | A.LAPRLAYSSAMLSS.A                           | 32.68 | 1465.76 | -0.3 |
| Neurofilament medium polypeptide | tr G3V7S2 G3V7S2_RAT | A.TKYITKSVTVTQK.V                            | 36.04 | 1495.86 | -0.8 |
| Neurofilament medium polypeptide | tr G3V7S2 G3V7S2_RAT | D.DKVVVTKKVEKIT.S                            | 15.93 | 1485.91 | -0.3 |
| Neurofilament medium polypeptide | tr G3V7S2 G3V7S2_RAT | D.VSPAEEKKGEDRSDDKVVV TKKVEKIT(-.98).S       | 21.96 | 3012.65 | -6.4 |
| Neurofilament medium polypeptide | tr G3V7S2 G3V7S2_RAT | D.VSPAEEKKGEDRSDDKVVV TKKVEKIT.S             | 57.29 | 3013.63 | -3.9 |
| Neurofilament medium polypeptide | tr G3V7S2 G3V7S2_RAT | E.AAEQNKEAIRSAKEEIAEYR RQLQ.S                | 29.64 | 2830.47 | 1    |
| Neurofilament medium polypeptide | tr G3V7S2 G3V7S2_RAT | E.EIIEETKVEDEK.S                             | 42.38 | 1460.72 | -0.7 |
| Neurofilament medium polypeptide | tr G3V7S2 G3V7S2_RAT | E.IIEETKVEDEK.S                              | 44.91 | 1331.68 | -1   |
| Neurofilament medium polypeptide | tr G3V7S2 G3V7S2_RAT | F.LRSNHEEEVADLLAQIQASHI TVERKDYLK.T          | 15.88 | 3504.83 | -2.4 |
| Neurofilament medium polypeptide | tr G3V7S2 G3V7S2_RAT | F.VEEIIEETKVEDEK.S                           | 48.19 | 1688.84 | -1.7 |
| Neurofilament medium polypeptide | tr G3V7S2 G3V7S2_RAT | G.SPSTVSSSYKRSA.L                            | 22.55 | 1355.67 | -0.4 |
| Neurofilament medium polypeptide | tr G3V7S2 G3V7S2_RAT | H.AIVKEVTQGD                                 | 18.04 | 1058.56 | -1.4 |
| Neurofilament medium polypeptide | tr G3V7S2 G3V7S2_RAT | H.RQPSVTISSK.I                               | 16.87 | 1101.61 | -3.1 |
| Neurofilament medium polypeptide | tr G3V7S2 G3V7S2_RAT | H.RQPSVTISSKIQK.T                            | 36.89 | 1470.85 | 0.4  |
| Neurofilament medium polypeptide | tr G3V7S2 G3V7S2_RAT | H.RQPSVTISSKIQKTK.V                          | 34.21 | 1699.99 | -0.4 |
| Neurofilament medium polypeptide | tr G3V7S2 G3V7S2_RAT | H.RQPSVTISSKIQKTKVE.A                        | 23.94 | 1928.11 | -1.4 |
| Neurofilament medium polypeptide | tr G3V7S2 G3V7S2_RAT | H.RQPSVTISSKIQKTKVEAPK.L                     | 18.24 | 2224.29 | -1.2 |
| Neurofilament medium polypeptide | tr G3V7S2 G3V7S2_RAT | H.RQPSVTISSKIQKTKVEAPK L.V                   | 16.46 | 2465.47 | -0.9 |
| Neurofilament medium polypeptide | tr G3V7S2 G3V7S2_RAT | I.SSKIQKTK.V                                 | 25.84 | 918.55  | -0.6 |

|                                  |                      |                                                   |       |         |       |
|----------------------------------|----------------------|---------------------------------------------------|-------|---------|-------|
| Neurofilament medium polypeptide | tr G3V7S2 G3V7S2_RAT | I.SSKIQKTKVEAPKLV.V                               | 39.83 | 1684.02 | 0.4   |
| Neurofilament medium polypeptide | tr G3V7S2 G3V7S2_RAT | K.FVEEIIIEETKVEDEK.S                              | 24.38 | 1835.9  | -0.7  |
| Neurofilament medium polypeptide | tr G3V7S2 G3V7S2_RAT | K.LKVQHKFVEEIIIEETKVEDEK.S                        | 38.57 | 2569.36 | 10.3  |
| Neurofilament medium polypeptide | tr G3V7S2 G3V7S2_RAT | K.TDISTALK.E                                      | 18.21 | 847.465 | -1    |
| Neurofilament medium polypeptide | tr G3V7S2 G3V7S2_RAT | K.TDISTALKEIR.S                                   | 31.02 | 1245.69 | -1.8  |
| Neurofilament medium polypeptide | tr G3V7S2 G3V7S2_RAT | K.TDISTALKEIRSQ.L                                 | 27.59 | 1460.78 | -1.7  |
| Neurofilament medium polypeptide | tr G3V7S2 G3V7S2_RAT | K.TDISTALKEIRSQLE.C                               | 39.05 | 1702.91 | -0.6  |
| Neurofilament medium polypeptide | tr G3V7S2 G3V7S2_RAT | K.TDISTALKEIRSQLEK(-1.01)HSDQNMHQAEWFKC(-1.01)R.Y | 19.49 | 3830.76 | -12.3 |
| Neurofilament medium polypeptide | tr G3V7S2 G3V7S2_RAT | K.TDISTALKEIRSQLECH.S                             | 37.17 | 1942.98 | -0.5  |
| Neurofilament medium polypeptide | tr G3V7S2 G3V7S2_RAT | K.VEAPKLV.V                                       | 23.64 | 783.485 | -0.3  |
| Neurofilament medium polypeptide | tr G3V7S2 G3V7S2_RAT | K.VEAPKLVQ.Q                                      | 33.32 | 882.554 | -0.2  |
| Neurofilament medium polypeptide | tr G3V7S2 G3V7S2_RAT | K.VEAPKLVQ.H                                      | 39.79 | 1010.61 | -0.6  |
| Neurofilament medium polypeptide | tr G3V7S2 G3V7S2_RAT | K.VEAPKLVQHK.F                                    | 15.99 | 1275.77 | -0.2  |
| Neurofilament medium polypeptide | tr G3V7S2 G3V7S2_RAT | K.VEAPKLVQHKFVEEIIIEETKVEDEK(-.98).S              | 16.22 | 3092.68 | -7.7  |
| Neurofilament medium polypeptide | tr G3V7S2 G3V7S2_RAT | K.VEAPKLVQHKFVEEIIIEETKVEDEK.S                    | 44.13 | 3093.66 | -0.5  |
| Neurofilament medium polypeptide | tr G3V7S2 G3V7S2_RAT | K.VEEHEETFEEKLVSTKKVEKVT.S                        | 68.78 | 2617.35 | -1    |
| Neurofilament medium polypeptide | tr G3V7S2 G3V7S2_RAT | K.VQHKFVEEIIIEETKVEDEK(+42.01)(-.98).S            | 30.87 | 2369.21 | -0.7  |
| Neurofilament medium polypeptide | tr G3V7S2 G3V7S2_RAT | K.VQHKFVEEIIIEETKVEDEK.S                          | 36.91 | 2328.18 | -0.9  |
| Neurofilament medium polypeptide | tr G3V7S2 G3V7S2_RAT | L.APRLAYSSAMLSS.A                                 | 21.47 | 1352.68 | -0.7  |
| Neurofilament medium polypeptide | tr G3V7S2 G3V7S2_RAT | L.KVQHKFVEEIIIEETKVEDEK.S                         | 18.73 | 2456.28 | -1.7  |
| Neurofilament medium polypeptide | tr G3V7S2 G3V7S2_RAT | L.YTHRQPSVTISSK.I                                 | 35.62 | 1502.78 | -0.8  |
| Neurofilament medium polypeptide | tr G3V7S2 G3V7S2_RAT | L.YTHRQPSVTISSKIQKTK.V                            | 57.41 | 2101.16 | -1.4  |
| Neurofilament medium polypeptide | tr G3V7S2 G3V7S2_RAT | M.S(+42.01)YTLDSLGNPSAYR.R.V                      | 32.13 | 1740.84 | -0.8  |
| Neurofilament medium polypeptide | tr G3V7S2 G3V7S2_RAT | M.S(+42.01)YTLDSLGNPSAYR.RVTET.R                  | 15.06 | 2171.05 | -1.1  |
| Neurofilament medium polypeptide | tr G3V7S2 G3V7S2_RAT | M.S(+42.01)YTLDSLGNPSAYR.RVTETR.S                 | 17.14 | 2327.15 | -2.2  |
| Neurofilament medium polypeptide | tr G3V7S2 G3V7S2_RAT | M.S(+42.01)YTLDSLGNPSAYR.RVTETRS.S                | 32.67 | 2414.18 | -0.3  |
| Neurofilament medium polypeptide | tr G3V7S2 G3V7S2_RAT | M.S(+42.01)YTLDSLGNPSAYR.RVTETRSSF.F              | 15.09 | 2501.21 | -0.1  |
| Neurofilament medium polypeptide | tr G3V7S2 G3V7S2_RAT | M.S(+42.01)YTLDSLGNPSAYR.RVTETRSSF.S              | 26.69 | 2648.28 | -1.4  |
| Neurofilament medium polypeptide | tr G3V7S2 G3V7S2_RAT | M.S(+42.01)YTLDSLGNPSAYR.RVTETRSSF.SR.V           | 40.87 | 2891.42 | -0.4  |
| Neurofilament medium polypeptide | tr G3V7S2 G3V7S2_RAT | M.S(+42.01)YTLDSLGNPSAYR.RVTETRSSF.SRVS.G         | 42.93 | 3077.52 | -1.7  |

|                                  |                      |                                                             |       |         |      |
|----------------------------------|----------------------|-------------------------------------------------------------|-------|---------|------|
| Neurofilament medium polypeptide | tr G3V7S2 G3V7S2_RAT | M.S(+42.01)YTLDSLGNPSAYR<br>RVTETRSSFSRVSGSPSSGFRSQ<br>SW.S | 23.97 | 4341.08 | -1.9 |
| Neurofilament medium polypeptide | tr G3V7S2 G3V7S2_RAT | P.LYTHRQPSVTISSKIQKTK.V                                     | 22.06 | 2214.25 | -0.7 |
| Neurofilament medium polypeptide | tr G3V7S2 G3V7S2_RAT | P.SSGFRSQSWSRGSPSTVS.S                                      | 41.79 | 1898.89 | -1   |
| Neurofilament medium polypeptide | tr G3V7S2 G3V7S2_RAT | Q.HKFVEEIIIEETKVEDEK.S                                      | 33.18 | 2101.06 | -0.2 |
| Neurofilament medium polypeptide | tr G3V7S2 G3V7S2_RAT | Q.KVEEHEETFEEKLVSTKKVE<br>KVT.S                             | 37.3  | 2745.44 | 0.3  |
| Neurofilament medium polypeptide | tr G3V7S2 G3V7S2_RAT | R.GSPSTVSSSYKRSAL.A                                         | 39.68 | 1525.77 | -0.8 |
| Neurofilament medium polypeptide | tr G3V7S2 G3V7S2_RAT | R.GSPSTVSSSYKRSALAPR.L                                      | 28.75 | 1849.96 | -0.7 |
| Neurofilament medium polypeptide | tr G3V7S2 G3V7S2_RAT | R.GSPSTVSSSYKRSALAPRLA.<br>Y                                | 25.33 | 2034.09 | 0.4  |
| Neurofilament medium polypeptide | tr G3V7S2 G3V7S2_RAT | R.GSPSTVSSSYKRSALAPRLAY<br>SSAMLS.S                         | 26.48 | 2860.44 | -3.6 |
| Neurofilament medium polypeptide | tr G3V7S2 G3V7S2_RAT | R.RVTETRSSFSRV.S                                            | 27.38 | 1510.79 | 0.3  |
| Neurofilament medium polypeptide | tr G3V7S2 G3V7S2_RAT | R.SALAPRLA.Y                                                | 26.22 | 797.476 | -0.6 |
| Neurofilament medium polypeptide | tr G3V7S2 G3V7S2_RAT | R.SALAPRLAY.S                                               | 19.15 | 960.539 | -1.3 |
| Neurofilament medium polypeptide | tr G3V7S2 G3V7S2_RAT | R.SALAPRLAYSSAMLS.S                                         | 40.33 | 1536.8  | -0.7 |
| Neurofilament medium polypeptide | tr G3V7S2 G3V7S2_RAT | R.SALAPRLAYSSAMLS.S                                         | 32.33 | 1623.83 | 1    |
| Neurofilament medium polypeptide | tr G3V7S2 G3V7S2_RAT | R.SSFSRV.S                                                  | 22.34 | 768.377 | -0.9 |
| Neurofilament medium polypeptide | tr G3V7S2 G3V7S2_RAT | R.SSFSRVSGSPSSGFRSQSWR<br>GSPSTVS.S                         | 40.82 | 2890.36 | -4.6 |
| Neurofilament medium polypeptide | tr G3V7S2 G3V7S2_RAT | R.SSFSRVSGSPSSGFRSQSWR<br>GSPSTVSSSYKRSAL                   | 17.6  | 3669.75 | -1.9 |
| Neurofilament medium polypeptide | tr G3V7S2 G3V7S2_RAT | R.VTETRSSFSRV.S                                             | 26.06 | 1354.68 | -0.6 |
| Neurofilament medium polypeptide | tr G3V7S2 G3V7S2_RAT | S.GSPSSGFRSQSW.S                                            | 46.63 | 1281.57 | -0.3 |
| Neurofilament medium polypeptide | tr G3V7S2 G3V7S2_RAT | S.GSPSSGFRSQSWR.G                                           | 34.51 | 1524.71 | -1.2 |
| Neurofilament medium polypeptide | tr G3V7S2 G3V7S2_RAT | S.GSPSSGFRSQSWRSGPST.V                                      | 34.9  | 1953.89 | -0.8 |
| Neurofilament medium polypeptide | tr G3V7S2 G3V7S2_RAT | S.GSPSSGFRSQSWRSGPSTVS.<br>S                                | 16.24 | 2139.99 | -0.1 |
| Neurofilament medium polypeptide | tr G3V7S2 G3V7S2_RAT | S.GSPSSGFRSQSWRSGPSTVS<br>SS.Y                              | 28.96 | 2314.06 | -4.3 |
| Neurofilament medium polypeptide | tr G3V7S2 G3V7S2_RAT | S.GSPSSGFRSQSWRSGPSTVS<br>SSYK.R                            | 35.95 | 2605.22 | -0.3 |
| Neurofilament medium polypeptide | tr G3V7S2 G3V7S2_RAT | S.GSPSSGFRSQSWRSGPSTVS<br>SSYKR.S                           | 38.67 | 2761.32 | 0    |
| Neurofilament medium polypeptide | tr G3V7S2 G3V7S2_RAT | S.GSPSSGFRSQSWRSGPSTVS<br>SSYKRS.A                          | 41.16 | 2848.35 | -1.8 |
| Neurofilament medium polypeptide | tr G3V7S2 G3V7S2_RAT | S.GSPSSGFRSQSWRSGPSTVS<br>SSYKRSAL                          | 39.37 | 2919.39 | -0.4 |
| Neurofilament medium polypeptide | tr G3V7S2 G3V7S2_RAT | S.GSPSSGFRSQSWRSGPSTVS<br>SSYKRSAL.A                        | 28.93 | 3032.47 | -3.6 |
| Neurofilament medium polypeptide | tr G3V7S2 G3V7S2_RAT | S.GSPSSGFRSQSWRSGPSTVS<br>SSYKRSALAPR.L                     | 23.42 | 3356.66 | 2.6  |
| Neurofilament medium polypeptide | tr G3V7S2 G3V7S2_RAT | S.GSPSSGFRSQSWRSGPSTVS<br>SSYKRSALAPRLAY.S                  | 29.37 | 3703.85 | -5.1 |

|                                  |                      |                                                                        |       |         |      |
|----------------------------------|----------------------|------------------------------------------------------------------------|-------|---------|------|
| Neurofilament medium polypeptide | tr G3V7S2 G3V7S2_RAT | S.GSPSSGFRSQSWSRGPSTVS<br>SSYKRSALAPRLAYSSA.M                          | 21.99 | 3948.95 | 4.2  |
| Neurofilament medium polypeptide | tr G3V7S2 G3V7S2_RAT | S.HAIVKEVTQGD                                                          | 48.14 | 1195.62 | -0.5 |
| Neurofilament medium polypeptide | tr G3V7S2 G3V7S2_RAT | S.SGFRSQSWSRGPST.V                                                     | 25.71 | 1625.75 | -2   |
| Neurofilament medium polypeptide | tr G3V7S2 G3V7S2_RAT | S.SKIQKTKVEAPKLLK.V                                                    | 30.87 | 1596.99 | -0.3 |
| Neurofilament medium polypeptide | tr G3V7S2 G3V7S2_RAT | S.SSYKRSALAPRLA.A                                                      | 36.62 | 1347.76 | -0.9 |
| Neurofilament medium polypeptide | tr G3V7S2 G3V7S2_RAT | S.SSYKRSALAPRLA.Y                                                      | 34.42 | 1418.8  | 0.6  |
| Neurofilament medium polypeptide | tr G3V7S2 G3V7S2_RAT | S.SSYKRSALAPRLAY.S                                                     | 15.11 | 1581.86 | -1.6 |
| Neurofilament medium polypeptide | tr G3V7S2 G3V7S2_RAT | T.GPLYTHRQPSVTIS.S                                                     | 35.86 | 1554.82 | -2   |
| Neurofilament medium polypeptide | tr G3V7S2 G3V7S2_RAT | T.GPLYTHRQPSVTISSK.I                                                   | 42.7  | 1769.94 | -1.2 |
| Neurofilament medium polypeptide | tr G3V7S2 G3V7S2_RAT | T.GPLYTHRQPSVTISSKIQKTK.<br>V                                          | 68.33 | 2368.32 | -0.9 |
| Neurofilament medium polypeptide | tr G3V7S2 G3V7S2_RAT | T.HRQPSVTISSKIQKTK.V                                                   | 39.46 | 1837.05 | -0.6 |
| Neurofilament medium polypeptide | tr G3V7S2 G3V7S2_RAT | T.SEGGDGATKYITK.S                                                      | 48    | 1325.65 | -0.1 |
| Neurofilament medium polypeptide | tr G3V7S2 G3V7S2_RAT | T.SEGGDGATKYITKSVTVTQK.<br>V                                           | 64.47 | 2069.06 | -0.8 |
| Neurofilament medium polypeptide | tr G3V7S2 G3V7S2_RAT | T.SEGGDGATKYITKSVTVTQK<br>VEEHEETFEEKLVSTKKVEKV<br>T.S                 | 36.47 | 4668.4  | 0.6  |
| Neurofilament medium polypeptide | tr G3V7S2 G3V7S2_RAT | T.SEGGDGATKYITKSVTVTQK<br>VEEHEETFEEKLVSTKKVEKV<br>TSHAIVKEVTQGD       | 16.08 | 5933.04 | -1   |
| Neurofilament medium polypeptide | tr G3V7S2 G3V7S2_RAT | T.SEGGDGATKYITKSVTVTQK<br>VEEHEETFEEKLVSTKKVEKV<br>TSHAIVKEVTQGD(-.98) | 17.37 | 5932.06 | -9.8 |
| Neurofilament medium polypeptide | tr G3V7S2 G3V7S2_RAT | T.SHAIVKEVTQGD                                                         | 52.07 | 1282.65 | -0.6 |
| Neurofilament medium polypeptide | tr G3V7S2 G3V7S2_RAT | T.VTQKVEEHEETFEEKLVSTK<br>KVEKVT.S                                     | 36.1  | 3073.62 | -0.3 |
| Neurofilament medium polypeptide | tr G3V7S2 G3V7S2_RAT | V.STKKVEKVTSHAIVKEVTQGD                                                | 34.93 | 2283.24 | 1.8  |
| Neurofilament medium polypeptide | tr G3V7S2 G3V7S2_RAT | W.SRGPSTVSSSYKRSAL.A                                                   | 37.66 | 1768.91 | -0.5 |
| Neurofilament medium polypeptide | tr G3V7S2 G3V7S2_RAT | W.SRGPSTVSSSYKRSALAPR.<br>L                                            | 30.12 | 2093.1  | -0.8 |
| Neurofilament medium polypeptide | tr G3V7S2 G3V7S2_RAT | W.SRGPSTVSSSYKRSALAPR<br>LA.Y                                          | 29.37 | 2277.22 | -4.6 |
| Neurofilament medium polypeptide | tr G3V7S2 G3V7S2_RAT | Y.ITKSVTVTQK.V                                                         | 36.94 | 1103.66 | -2.2 |
| Neurofilament medium polypeptide | tr G3V7S2 G3V7S2_RAT | Y.KRSALAPRLA.A                                                         | 16.56 | 1010.63 | -0.5 |
| Neurofilament medium polypeptide | tr G3V7S2 G3V7S2_RAT | Y.KRSALAPRLA.Y                                                         | 20.8  | 1081.67 | -0.3 |
| Neurofilament medium polypeptide | tr G3V7S2 G3V7S2_RAT | Y.LEQQNKEIEAEIHALRQKQA<br>SHAQLGDAYDQEIREL.R                           | 15.29 | 4201.12 | 1.3  |
| Neurofilament medium polypeptide | tr G3V7S2 G3V7S2_RAT | Y.RRVTETRSSFSRV.S.G                                                    | 40.45 | 1666.89 | -0.3 |
| Neurofilament medium polypeptide | tr G3V7S2 G3V7S2_RAT | Y.THRQPSVTIS.S                                                         | 26.69 | 1124.59 | 1    |
| Neurofilament medium polypeptide | tr G3V7S2 G3V7S2_RAT | Y.THRQPSVTISSK.I                                                       | 47.48 | 1339.72 | -0.6 |

|                                             |                       |                                                                              |       |         |      |
|---------------------------------------------|-----------------------|------------------------------------------------------------------------------|-------|---------|------|
| Neurofilament medium polypeptide            | tr G3V7S2 G3V7S2_RAT  | Y.THRQPSVTISSKIQKTK.V                                                        | 45.41 | 1938.1  | -0.1 |
| Neurofilament medium polypeptide            | tr G3V7S2 G3V7S2_RAT  | Y.THRQPSVTISSKIQKTKVE.A                                                      | 18.75 | 2166.21 | -0.5 |
| Neurofilament medium polypeptide            | tr G3V7S2 G3V7S2_RAT  | Y.THRQPSVTISSKIQKTKVEAP K(-.98).L                                            | 23.03 | 2461.41 | -5.8 |
| Neurofilament medium polypeptide            | tr G3V7S2 G3V7S2_RAT  | Y.THRQPSVTISSKIQKTKVEAP K.L                                                  | 50.21 | 2462.4  | -0.3 |
| Neurofilament medium polypeptide            | tr G3V7S2 G3V7S2_RAT  | Y.THRQPSVTISSKIQKTKVEAP K.LK.V                                               | 29.28 | 2703.58 | -0.3 |
| Noncompact myelin-associated protein        | tr M0R3T9 M0R3T9_RA T | G.SQQPAAVTSDPADVPVETR                                                        | 42    | 1966.96 | -1.1 |
| Noncompact myelin-associated protein        | tr M0R3T9 M0R3T9_RA T | D.PADVPEVETR                                                                 | 23.24 | 982.508 | -0.2 |
| Nuclear transport factor 2                  | sp P61972 NTF2_RAT    | M.G(+42.01)DKPIWEQIGSSFIQ HYY.Q                                              | 23.35 | 2209.05 | -0.7 |
| Nuclear transport factor 2                  | sp P62282 RS11_RAT    | F.NVLKVTKAAGTKKQFQK.F                                                        | 19.58 | 1888.13 | -1   |
| Nuclear transport factor 2                  | sp P62282 RS11_RAT    | M.A(+42.01)DIQTERAYQKQPTI F.Q                                                | 31.45 | 1949.98 | -2.8 |
| Nuclear transport factor 2                  | sp P61972 NTF2_RAT    | M.G(+42.01)DKPIWEQIGSSFIQ H.Y                                                | 34.14 | 1882.92 | -2   |
| Nuclear transport factor 2                  | sp P61972 NTF2_RAT    | M.G(+42.01)DKPIWEQIGSSFIQ HY.Y                                               | 41.88 | 2045.98 | -4   |
| Nucleophosmin                               | sp P13084 NPM_RAT     | F.RMTDQEAIQDLWQWRKSL                                                         | 44.96 | 2303.15 | -0.8 |
| Nucleoside diphosphate kinase alpha isoform | tr Q9QWQ4 Q9QWQ4_R AT | M.A(+42.01)NLERTFIAIKPDGV QR.G                                               | 29.22 | 1969.07 | -1.5 |
| Nucleoside diphosphate kinase               | tr Q6LCQ4 Q6LCQ4_RA T | M.A(+42.01)NSERTFIAIKPDGV. Q                                                 | 21.22 | 1658.86 | -0.7 |
| Osteocalcin                                 | sp P04640 OSTCN_RAT   | G.FQDAYKRIYGTTV                                                              | 38.96 | 1560.79 | 0.2  |
| Osteoglycin                                 | tr D3ZVB7 D3ZVB7_RA T | F.TGNLIEDIEDGTFSK.L                                                          | 28.91 | 1637.78 | -2   |
| Osteoglycin                                 | tr D3ZVB7 D3ZVB7_RA T | F.TGNLIEDIEDGTFSK.L.S                                                        | 32.26 | 1750.86 | 2.3  |
| Osteoglycin                                 | tr D3ZVB7 D3ZVB7_RA T | L.DFTGNLIEDIEDGTFSK.L                                                        | 31.86 | 1899.87 | 1.1  |
| Osteoglycin                                 | tr D3ZVB7 D3ZVB7_RA T | L.K(+42.01)(+42.01)RLPTGS(-.98).Y                                            | 15.57 | 840.482 | 0.6  |
| Osteoglycin                                 | tr D3ZVB7 D3ZVB7_RA T | N.K(+42.01)(+42.01)IKK(+42.01) LTAKDFADM(+15.99)PNLRRLD FTGNLIEDIEDGTFSK.L.S | 18.56 | 4394.28 | -3.3 |
| Osteoglycin                                 | tr D3ZVB7 D3ZVB7_RA T | Y.IRERMEEIR.L                                                                | 23.57 | 1230.65 | -0.2 |
| Peptidyl-prolyl cis-trans isomerase         | tr G3V6L9 G3V6L9_RAT  | M.A(+42.01)AAVPQRAWTVEQ L.R                                                  | 18.37 | 1580.83 | -0.2 |
| Peptidyl-prolyl cis-trans isomerase         | tr G3V6L9 G3V6L9_RAT  | M.A(+42.01)AAVPQRAWTVEQ LRS.E                                                | 43.11 | 1823.96 | -0.1 |
| Peptidyl-prolyl cis-trans isomerase A       | sp P10111 PPIA_RAT    | C.FELFADKVPKTAENFRAL.S                                                       | 29.03 | 2095.11 | -1.9 |
| Peptidyl-prolyl cis-trans isomerase A       | sp P10111 PPIA_RAT    | C.QGGDFTRHNGTGGKSIYGEK F.E                                                   | 15.89 | 2255.07 | -0.7 |
| Peptidyl-prolyl cis-trans isomerase A       | sp P10111 PPIA_RAT    | C.QGGDFTRHNGTGGKSIYGEK FEDENFILKH.T                                          | 21.63 | 3380.62 | -4.8 |
| Peptidyl-prolyl cis-trans isomerase A       | sp P10111 PPIA_RAT    | C.QGGDFTRHNGTGGKSIYGEK FEDENFILKHTGPGILSM.A                                  | 20.35 | 4137    | -0.4 |
| Peptidyl-prolyl cis-trans isomerase A       | sp P10111 PPIA_RAT    | F.ADKVPKTAENF.R                                                              | 28.31 | 1218.62 | -0.8 |
| Peptidyl-prolyl cis-trans isomerase A       | sp P10111 PPIA_RAT    | F.ADKVPKTAENFRAL.S                                                           | 37.53 | 1558.85 | -1.1 |



|                                            |                      |                                                         |       |         |      |
|--------------------------------------------|----------------------|---------------------------------------------------------|-------|---------|------|
| Peptidyl-prolyl cis-trans isomerase A      | sp P10111 PPIA_RAT   | F.EDENFILKHTGPGILSM.A                                   | 53.55 | 1899.94 | -0.1 |
| Peptidyl-prolyl cis-trans isomerase A      | sp P10111 PPIA_RAT   | F.ELFADKVPKTAENFRAL.S                                   | 20    | 1948.04 | 0.6  |
| Peptidyl-prolyl cis-trans isomerase A      | sp P10111 PPIA_RAT   | F.GKVKEGMSIVEA.M                                        | 23.13 | 1246.66 | -2.2 |
| Peptidyl-prolyl cis-trans isomerase A      | sp P10111 PPIA_RAT   | F.GKVKEGMSIVEAMER.F                                     | 23.69 | 1662.84 | -0.6 |
| Peptidyl-prolyl cis-trans isomerase A      | sp P10111 PPIA_RAT   | F.RALSTGEKGFYKGS.S.F                                    | 28.5  | 1643.83 | -0.2 |
| Peptidyl-prolyl cis-trans isomerase A      | sp P10111 PPIA_RAT   | F.RALSTGEKGFYKGS.S.F.H                                  | 22.89 | 1790.9  | 1.4  |
| Peptidyl-prolyl cis-trans isomerase A      | sp P10111 PPIA_RAT   | H.NGTGGKSIYGEKFEENFILKHTGPGILSM.A                       | 36.16 | 3238.6  | 0.7  |
| Peptidyl-prolyl cis-trans isomerase A      | sp P10111 PPIA_RAT   | L.KHTGPGILSM.A                                          | 46.17 | 1039.55 | -2.3 |
| Peptidyl-prolyl cis-trans isomerase A      | sp P10111 PPIA_RAT   | M.V(+42.01)NPTVFFDITADGEP LGR.V                         | 20.23 | 1988.98 | 1.5  |
| Peptidyl-prolyl cis-trans isomerase A      | sp P10111 PPIA_RAT   | M.V(+42.01)NPTVFFDITADGEP LGRVC.F                       | 15.8  | 2191.06 | -1   |
| Peptidyl-prolyl cis-trans isomerase A      | sp P10111 PPIA_RAT   | M.VNPTVFFDITADGEPLGR.V                                  | 37.15 | 1946.97 | 7.6  |
| Peptidyl-prolyl cis-trans isomerase A      | sp P10111 PPIA_RAT   | M.VNPTVFFDITADGEPLGRV(-.98).C                           | 24.18 | 2045.06 | -1.2 |
| Peptidyl-prolyl cis-trans isomerase A      | sp P10111 PPIA_RAT   | M.VNPTVFFDITADGEPLGRVC.F                                | 38.51 | 2149.05 | 3.3  |
| Peptidyl-prolyl cis-trans isomerase FKBP1A | sp Q62658 FKB1A_RAT  | F.DVELLKLE                                              | 28.8  | 957.538 | -1.5 |
| Peptidyl-prolyl cis-trans isomerase FKBP1A | sp Q62658 FKB1A_RAT  | M.GVQVETISSGDGRTPFKRGQT(-.98).C                         | 25.96 | 2218.15 | -1.1 |
| Peptidyl-prolyl cis-trans isomerase FKBP1A | sp Q62658 FKB1A_RAT  | Y.TGMLEDGKKFDSSRDRNKPF.K                                | 22.71 | 2327.13 | -0.4 |
| Peptidyl-prolyl cis-trans isomerase FKBP1A | sp Q62658 FKB1A_RAT  | L.VFDVELLKLE                                            | 35.07 | 1203.68 | 0.2  |
| Peptidyl-prolyl cis-trans isomerase FKBP1A | sp Q62658 FKB1A_RAT  | M.SVGQRAKLIIISPDYAYGATGHPGIIPPHATL.V                    | 26.62 | 3199.71 | -5.2 |
| Peptidyl-prolyl cis-trans isomerase FKBP1A | sp Q62658 FKB1A_RAT  | V.FDVELLKLE                                             | 30.37 | 1104.61 | -0.7 |
| Periaxin                                   | tr G3V8D2 G3V8D2_RAT | L.KIPEVELVTPGAQETEKVTSGVKPSGLQVSTTRQVVAEGQEG AQRVSSLG.I | 24.89 | 5160.73 | 8.9  |
| Periaxin                                   | tr G3V8D2 G3V8D2_RAT | L.PDIQLPKVPEMKL.P                                       | 34.02 | 1506.85 | 0.2  |
| Periaxin                                   | tr G3V8D2 G3V8D2_RAT | L.PKVPEMTPDIRLPEVQL.P                                   | 21.76 | 2092.11 | -1.6 |
| Periaxin                                   | tr G3V8D2 G3V8D2_RAT | L.PTLGLGAPAAVEPPTTIQVPQVEL.P                            | 17.28 | 2622.43 | -1.9 |
| Periaxin                                   | tr G3V8D2 G3V8D2_RAT | L.PTLKMPSFGISV.A                                        | 21.93 | 1275.69 | -0.4 |
| Periaxin                                   | tr G3V8D2 G3V8D2_RAT | R.MPTFGLSLLSRPSGPEAAAE SKLKLPTLK.M                      | 16    | 3167.73 | -1.9 |
| Periaxin                                   | tr G3V8D2 G3V8D2_RAT | V.KLPKIPDMAVPDVR.L.P                                    | 28.7  | 1690.98 | 0.3  |
| Periaxin                                   | tr G3V8D2 G3V8D2_RAT | Y.EDALRLLQC.A                                           | 28.38 | 1059.54 | 0    |
| Periaxin                                   | sp Q63425 PRAX_RAT   | A.AAPPSRKAKSEAEVA.T                                     | 23.79 | 1510.81 | -1.9 |
| Periaxin                                   | sp Q63425 PRAX_RAT   | A.EGQEGAQRVSSLG.I                                       | 47.37 | 1316.63 | 0.1  |
| Periaxin                                   | sp Q63425 PRAX_RAT   | D.AQLPSGKVEVAGAE.S                                      | 25.84 | 1354.71 | -4.9 |

|          |                    |                                               |       |         |      |
|----------|--------------------|-----------------------------------------------|-------|---------|------|
| Periaxin | sp Q63425 PRAX_RAT | E.AIAGQLKIPEVE.L                              | 20.68 | 1266.72 | 0.7  |
| Periaxin | sp Q63425 PRAX_RAT | E.LDVGLGHEAQAGETAKSEG<br>GLK.L                | 24.38 | 2166.09 | -1.6 |
| Periaxin | sp Q63425 PRAX_RAT | E.SRPSGPEVAAESKLLKPLTK.<br>M                  | 28.08 | 2107.2  | 2.9  |
| Periaxin | sp Q63425 PRAX_RAT | F.GLARAKEGIETGEKVKSPKL<br>R.L                 | 29.2  | 2266.31 | -0.3 |
| Periaxin | sp Q63425 PRAX_RAT | F.KLPKMTVPKLG.K                               | 44.09 | 1210.75 | -0.5 |
| Periaxin | sp Q63425 PRAX_RAT | F.SETAAPGSARIEGTQAAA.I                        | 39.02 | 1686.82 | -0.7 |
| Periaxin | sp Q63425 PRAX_RAT | F.SRLRRGLKADAVKGPVPAAP<br>AR.R                | 20.3  | 2285.36 | -0.1 |
| Periaxin | sp Q63425 PRAX_RAT | G.HEAQAGETAKSEGGLK.L                          | 32.11 | 1611.79 | -0.6 |
| Periaxin | sp Q63425 PRAX_RAT | G.KGWGWDGKVKMPKLM                             | 43.12 | 1756.98 | 0.9  |
| Periaxin | sp Q63425 PRAX_RAT | G.KVTKPGEAGIEVDPK.L                           | 36.15 | 1566.86 | 0.4  |
| Periaxin | sp Q63425 PRAX_RAT | G.KVTKPGEAGIEVDPKLLILPC<br>.L                 | 15.5  | 2219.26 | -0.6 |
| Periaxin | sp Q63425 PRAX_RAT | G.LSGPKAVKAEVEGPGRATKL<br>K.V                 | 26.99 | 2135.24 | 0.1  |
| Periaxin | sp Q63425 PRAX_RAT | G.TEVARVGVPSL.S                               | 24.99 | 1126.63 | -0.3 |
| Periaxin | sp Q63425 PRAX_RAT | G.TEVARVGVPSLS.L                              | 18.55 | 1213.67 | -1.1 |
| Periaxin | sp Q63425 PRAX_RAT | G.TPADLAPVDVEFSFPKF.S                         | 50.26 | 1878.94 | -1.6 |
| Periaxin | sp Q63425 PRAX_RAT | G.TPADLAPVDVEFSFPKFS.R                        | 49.39 | 1965.97 | -1   |
| Periaxin | sp Q63425 PRAX_RAT | G.TPADLAPVDVEFSFPKFSR.L                       | 26.22 | 2122.07 | -1   |
| Periaxin | sp Q63425 PRAX_RAT | G.TPADLAPVDVEFSFPKFSRL.<br>R                  | 15.7  | 2235.16 | 0.6  |
| Periaxin | sp Q63425 PRAX_RAT | K.ADAVKGPVPAAPARR.R                           | 30.82 | 1474.84 | -0.1 |
| Periaxin | sp Q63425 PRAX_RAT | K.ADAVKGPVPAAPARRRLQ.L                        | 30.81 | 1872.08 | -0.4 |
| Periaxin | sp Q63425 PRAX_RAT | K.MPSFGLSRGKEAEIQDGRVS<br>PGEKLE.A            | 24.7  | 2816.41 | 0.6  |
| Periaxin | sp Q63425 PRAX_RAT | L.ESRPSGPEVAAESKLLKPLTK<br>.M                 | 26.69 | 2236.24 | -0.9 |
| Periaxin | sp Q63425 PRAX_RAT | L.KIPEVELVTPGAQETEKVTSG<br>VKPSGLQVSTTRQVVA.E | 16.07 | 3862.11 | -2.4 |
| Periaxin | sp Q63425 PRAX_RAT | L.KLPKVPENTMPDIRLPEVQL.<br>P                  | 35.69 | 2333.29 | -0.8 |
| Periaxin | sp Q63425 PRAX_RAT | L.PKAPEAAIPDVQLPEVQL.P                        | 28.29 | 1914.05 | -5.6 |
| Periaxin | sp Q63425 PRAX_RAT | L.PKVPMAVPDVPLPELQL.P                         | 28.77 | 1971.08 | 1    |
| Periaxin | sp Q63425 PRAX_RAT | L.RVREVAEEAQVAR.M                             | 33.7  | 1511.82 | 0.1  |
| Periaxin | sp Q63425 PRAX_RAT | M(+42.01)EARSRSAEELR.R                        | 20.41 | 1475.72 | -0.1 |
| Periaxin | sp Q63425 PRAX_RAT | M(+42.01)EARSRSAEELRRAEL<br>VEL.I             | 17.14 | 2286.18 | -0.3 |
| Periaxin | sp Q63425 PRAX_RAT | P.ADLAPVDVEFSFPKF.S                           | 18.61 | 1680.84 | -5   |
| Periaxin | sp Q63425 PRAX_RAT | P.RFGVRGKEATEAKVVKGS(+<br>79.97)PEAKAKGPRLR.M | 25.87 | 3201.76 | 1    |
| Periaxin | sp Q63425 PRAX_RAT | Q.SLSPVKKKKMVIPTLG.T                          | 33.47 | 1685.03 | -0.2 |
| Periaxin | sp Q63425 PRAX_RAT | R.MPTFGLSLLSRPSGPEVA.A                        | 39.17 | 1987.01 | 0    |
| Periaxin | sp Q63425 PRAX_RAT | R.MPTFGLSLLSRPSGPEVAAE<br>SKLKLPTLK.M         | 31.45 | 3195.76 | -3.1 |
| Periaxin | sp Q63425 PRAX_RAT | R.RGLKADAVKGPVPAAPARR.<br>R                   | 28.27 | 1929.14 | 0.1  |

|                                  |                      |                                                              |       |         |      |
|----------------------------------|----------------------|--------------------------------------------------------------|-------|---------|------|
| Periaxin                         | sp Q63425 PRAX_RAT   | S.FPRFGVRGKEATEAKVVK.G                                       | 19.62 | 2018.14 | 0.3  |
| Periaxin                         | sp Q63425 PRAX_RAT   | S.FPRFGVRGKEATEAKVVKGS<br>(+79.97)PEAKAKGPRLR.M              | 21.43 | 3445.88 | -0.3 |
| Periaxin                         | sp Q63425 PRAX_RAT   | S.FPRFGVRGKEATEAKVVKGS<br>PEAKAKGPRLR.M                      | 19.19 | 3365.92 | -1.4 |
| Periaxin                         | sp Q63425 PRAX_RAT   | S.LSPVKKKKMVIGTLG.T                                          | 15.33 | 1598    | -0.4 |
| Periaxin                         | sp Q63425 PRAX_RAT   | T.AAPGSARIEGTQAAAI                                           | 24.6  | 1482.78 | -1.3 |
| Periaxin                         | sp Q63425 PRAX_RAT   | V.AGGDLLVGEGIFKMPTVTV.<br>P                                  | 21.55 | 1903.01 | -8.8 |
| Periaxin                         | sp Q63425 PRAX_RAT   | V.AGPEVKAPKGPEVKLPKVPE<br>IKL.P                              | 18.64 | 2423.45 | 4.2  |
| Periaxin                         | sp Q63425 PRAX_RAT   | V.KLPKIPDMAVPDVRLELQL.<br>P                                  | 15.56 | 2271.3  | -1.1 |
| Peripherin                       | sp P21807 PERI_RAT   | F.GPPPSLSPGAFSYSSSR.F                                        | 33.73 | 1779.84 | -3   |
| Peripherin                       | sp P21807 PERI_RAT   | F.GPPPSLSPGAFSYSSSRF.S                                       | 23.68 | 1926.91 | 0.5  |
| Peripherin                       | sp P21807 PERI_RAT   | F.GPPPSLSPGAFSYSSSRFSSS<br>R.L                               | 21.72 | 2344.11 | -6.2 |
| Peripherin                       | sp P21807 PERI_RAT   | M.S(+42.01)HHSSGLRSSISST.S                                   | 23.9  | 1483.7  | -0.8 |
| Peripherin                       | sp P21807 PERI_RAT   | M.S(+42.01)HHSSGLRSSISST.<br>Y                               | 51.15 | 1570.73 | -1.3 |
| Peripherin                       | sp P21807 PERI_RAT   | M.S(+42.01)HHSSGLRSSISSTSY<br>.R                             | 59.12 | 1733.8  | -1.1 |
| Peripherin                       | sp P21807 PERI_RAT   | M.S(+42.01)HHSSGLRSSISSTSY<br>RR.T                           | 19.49 | 2046    | -1.1 |
| Peripherin                       | sp P21807 PERI_RAT   | M.S(+42.01)HHSSGLRSSISSTSY<br>RRTF.G                         | 16.29 | 2294.12 | 0    |
| Peripherin                       | sp P21807 PERI_RAT   | N.Q(-<br>17.03)EFLATRSNEKQELQELND<br>RFANFIEKVRFLQON(-.98).A | 16.53 | 4293.16 | -3.8 |
| Peripherin                       | sp P21807 PERI_RAT   | R.TIETRDGEKVVTESQKEQHS<br>ELDKSSIHSY                         | 36.01 | 3459.68 | -2   |
| Peripherin                       | tr F1M7P4 F1M7P4_RAT | F.GPPPSLSPGAFSYSSSRFSSS<br>RLLG.S                            | 17.09 | 2627.3  | -1.2 |
| Peripherin                       | tr F1M7P4 F1M7P4_RAT | G.SGSPSSSARLG.S                                              | 25.39 | 1004.49 | 0.2  |
| Peripherin                       | tr F1M7P4 F1M7P4_RAT | M.PSSASMSHHSSGLR.S                                           | 30.75 | 1439.66 | -0.2 |
| Peripherin                       | tr F1M7P4 F1M7P4_RAT | M.PSSASMSHHSSGLRSSISST<br>Y.R                                | 34.58 | 2252.01 | -0.7 |
| Peripherin                       | tr F1M7P4 F1M7P4_RAT | M.PSSASMSHHSSGLRSSISST<br>YRRT.F                             | 17.07 | 2665.26 | 0.6  |
| Peripherin                       | tr F1M7P4 F1M7P4_RAT | M.PSSASMSHHSSGLRSSISST<br>YRRTF.G                            | 24.98 | 2812.33 | 0.6  |
| Peripherin                       | tr F1M7P4 F1M7P4_RAT | M.S(+42.01)HHSSGLRSSISSTSY<br>RRT.F                          | 19.93 | 2147.05 | -3.2 |
| Peroxiredoxin-2                  | sp P35704 PRDX2_RAT  | I.PLLADVTKSLSQNY.G                                           | 36.36 | 1547.82 | -0.6 |
| Peroxiredoxin-5<br>mitochondrial | sp Q9R063 PRDX5_RAT  | A.PIKVGDTIPSVEV.F                                            | 37.85 | 1352.76 | -1   |
| Peroxiredoxin-5<br>mitochondrial | sp Q9R063 PRDX5_RAT  | A.PIKVGDTIPSVEVF.E                                           | 39.62 | 1499.82 | -1   |
| Peroxiredoxin-5<br>mitochondrial | sp Q9R063 PRDX5_RAT  | C.SLAPNILSQL                                                 | 27.78 | 1054.6  | -3.6 |
| Peroxiredoxin-5<br>mitochondrial | sp Q9R063 PRDX5_RAT  | L.LADPTGAFGKETDLLLDDSL<br>VSLFGNRR.L                         | 15.18 | 3019.56 | -0.9 |
| Peroxiredoxin-5<br>mitochondrial | sp Q9R063 PRDX5_RAT  | M.APIKVGDTIPSVEV.F                                           | 25.09 | 1423.79 | -2   |
| Peroxiredoxin-5<br>mitochondrial | sp Q9R063 PRDX5_RAT  | M.APIKVGDTIPSVEVF.E                                          | 18.59 | 1570.86 | -1.6 |

|                                            |                     |                                                                               |       |         |      |
|--------------------------------------------|---------------------|-------------------------------------------------------------------------------|-------|---------|------|
| Phosphatidylethanolamine-binding protein 1 | sp P31044 PEBP1_RAT | A.EWDDSVPKLHDQLAGK                                                            | 24.78 | 1836.9  | 0.3  |
| Phosphatidylethanolamine-binding protein 1 | sp P31044 PEBP1_RAT | F.Q(-17.03)AEWDDSVPKLHDQLAGK                                                  | 17.06 | 2018.97 | -5.9 |
| Phosphatidylethanolamine-binding protein 1 | sp P31044 PEBP1_RAT | F.QAEWDDSVPKLHDQLAGK                                                          | 21.9  | 2036    | -0.6 |
| Phosphatidylethanolamine-binding protein 1 | sp P31044 PEBP1_RAT | G.PLSLQEVDEPPQHAL.R                                                           | 25.08 | 1671.85 | -0.7 |
| Phosphatidylethanolamine-binding protein 1 | sp P31044 PEBP1_RAT | L.DPGKLYTL.V                                                                  | 26.45 | 905.486 | 0.6  |
| Phosphatidylethanolamine-binding protein 1 | sp P31044 PEBP1_RAT | L.RVDYGGVTVDELGKVLTPTVQVMNR.P                                                 | 31.21 | 2646.38 | 2.2  |
| Phosphatidylethanolamine-binding protein 1 | sp P31044 PEBP1_RAT | L.RVDYGGVTVDELGKVLTPTVQVMNRSSISWDGLDPGKLYTL.V                                 | 17.84 | 4476.3  | -1.8 |
| Phosphatidylethanolamine-binding protein 1 | sp P31044 PEBP1_RAT | L.VLTDPDAPSRKDPKFWREWHH.F                                                     | 18.42 | 2430.22 | -1.9 |
| Phosphatidylethanolamine-binding protein 1 | sp P31044 PEBP1_RAT | L.VLTDPDAPSRKDPKFWREWHH.FL.V                                                  | 19.55 | 2690.37 | -1.2 |
| Phosphatidylethanolamine-binding protein 1 | sp P31044 PEBP1_RAT | L.VLTDPDAPSRKDPKFWREWHH.FLVV.N                                                | 30.73 | 2888.51 | -1   |
| Phosphatidylethanolamine-binding protein 1 | sp P31044 PEBP1_RAT | M.A(+42.01)ADISQWAGPLSLQEVDEPPQHAL.R                                          | 27.6  | 2613.27 | -0.3 |
| Phosphatidylethanolamine-binding protein 1 | sp P31044 PEBP1_RAT | M.A(+42.01)ADISQWAGPLSLQEVDEPPQHALR.V                                         | 21.46 | 2769.37 | -1.4 |
| Phosphatidylethanolamine-binding protein 1 | sp P31044 PEBP1_RAT | M.A(+42.01)ADISQWAGPLSLQEVDEPPQHALRV.D                                        | 21.41 | 2868.44 | -2.5 |
| Phosphatidylethanolamine-binding protein 1 | sp P31044 PEBP1_RAT | M.A(+42.01)ADISQWAGPLSLQEVDEPPQHALRVDY.G                                      | 22.19 | 3146.53 | 1.1  |
| Phosphatidylethanolamine-binding protein 1 | sp P31044 PEBP1_RAT | M.A(+42.01)ADISQWAGPLSLQEVDEPPQHALRVDYGGVTVDELGKVLTPTVQVMNR.P                 | 34.41 | 5241.64 | -0.2 |
| Phosphatidylethanolamine-binding protein 1 | sp P31044 PEBP1_RAT | M.A(+42.01)ADISQWAGPLSLQEVDEPPQHALRVDYGGVTVDELGKVLTPTVQVMNRSSISW.D            | 31.53 | 5898.95 | 0.9  |
| Phosphatidylethanolamine-binding protein 1 | sp P31044 PEBP1_RAT | M.A(+42.01)ADISQWAGPLSLQEVDEPPQHALRVDYGGVTVDELGKVLTPTVQVMNRSSISWDGLDPGKLY.T   | 18.59 | 6857.43 | -0.8 |
| Phosphatidylethanolamine-binding protein 1 | sp P31044 PEBP1_RAT | M.A(+42.01)ADISQWAGPLSLQEVDEPPQHALRVDYGGVTVDELGKVLTPTVQVMNRSSISWDGLDPGKLYTL.V | 23.82 | 7071.56 | -3.2 |
| Phosphatidylethanolamine-binding protein 1 | sp P31044 PEBP1_RAT | M.KGNDISSGTVLSEY.V                                                            | 18.25 | 1468.7  | 1.6  |
| Phosphatidylethanolamine-binding protein 1 | sp P31044 PEBP1_RAT | M.KGNDISSGTVLSEYVVGSGPPKDTGLHR.Y                                              | 26.53 | 2770.39 | -3.7 |
| Phosphatidylethanolamine-binding protein 1 | sp P31044 PEBP1_RAT | M.KGNDISSGTVLSEYVVGSGPPKDTGLHRY.V                                             | 34.23 | 2933.45 | -1.8 |
| Phosphatidylethanolamine-binding protein 1 | sp P31044 PEBP1_RAT | N.RPSSISWDGLDPGKLYTL.V                                                        | 37.63 | 2004.03 | -0.3 |
| Phosphatidylethanolamine-binding protein 1 | sp P31044 PEBP1_RAT | Q.AEWDDSVPKLHDQLAGK                                                           | 19.96 | 1907.94 | -1.4 |
| Phosphatidylethanolamine-binding protein 1 | sp P31044 PEBP1_RAT | R.PSSISWDGLDPGKLYTL.V                                                         | 39.85 | 1847.93 | 0.1  |
| Phosphatidylethanolamine-binding protein 1 | sp P31044 PEBP1_RAT | V.DYGGVTVDELGKVLTPTVQVM                                                       | 30.18 | 1990.03 | -1.9 |
| Phosphatidylethanolamine-binding protein 1 | sp P31044 PEBP1_RAT | W.AGPLSLQEVDEPPQHAL.R                                                         | 39    | 1799.91 | -2.7 |

|                                                      |                      |                                          |       |         |      |
|------------------------------------------------------|----------------------|------------------------------------------|-------|---------|------|
| Phosphatidylethanolamine-binding protein 1           | sp P31044 PEBP1_RAT  | W.DDSVPKLHDQLAGK                         | 38.04 | 1521.78 | -1.3 |
| Phosphatidylethanolamine-binding protein 1           | sp P31044 PEBP1_RAT  | M.A(+42.01)ADISQWAGPLSL.Q                | 29.15 | 1369.69 | -1.4 |
| Phosphatidylethanolamine-binding protein 1           | sp P31044 PEBP1_RAT  | M.A(+42.01)ADISQWAGPLSLQ E.V             | 20.82 | 1626.79 | -2.6 |
| Plasmolipin                                          | sp P47987 PLLP_RAT   | M.A(+42.01)EFPSKVSTRT.S                  | 45    | 1263.65 | -1.2 |
| Plasmolipin                                          | sp P47987 PLLP_RAT   | M.A(+42.01)EFPSKVSTRTS.S                 | 37.43 | 1350.68 | -0.7 |
| Plasmolipin                                          | sp P47987 PLLP_RAT   | M.A(+42.01)EFPSKVSTRTSSPA QG.V           | 32.41 | 1790.88 | -1.6 |
| Plectin 4                                            | tr Q6S3A1 Q6S3A1_RAT | Q.EAGILSMEELQRLT.Q                       | 34.9  | 1588.81 | -1.7 |
| Polymerase I and transcript release factor           | sp P85125 PTRF_RAT   | G.TRLVPVERREKLT.T                        | 21.88 | 1622.99 | -0.4 |
| Polymerase I and transcript release factor           | sp P85125 PTRF_RAT   | K.TSRDKLRKSFTPDHVYARS KTAVY.K            | 16.69 | 2924.56 | -3.1 |
| Polymerase I and transcript release factor           | sp P85125 PTRF_RAT   | M(+42.01)EDVTLHIVERPYS.G                 | 38.13 | 1729.83 | -1   |
| Polymerase I and transcript release factor           | tr G3V8L9 G3V8L9_RAT | E.KTRLKTKENLEKTRHTLEK.R                  | 23.7  | 2352.36 | 0.5  |
| Polymerase I and transcript release factor           | tr G3V8L9 G3V8L9_RAT | F.HVKKIREGEVEV.L                         | 36.06 | 1421.8  | -1.6 |
| Polymerase I and transcript release factor           | tr G3V8L9 G3V8L9_RAT | G.TRLVPVERREKLTSRDKLR.K                  | 20.12 | 2479.48 | 1.2  |
| Polymerase I and transcript release factor           | tr G3V8L9 G3V8L9_RAT | K.RSGLRRVDDFKKA.F                        | 22.92 | 1546.87 | -5.6 |
| Polymerase I and transcript release factor           | tr G3V8L9 G3V8L9_RAT | L.KTKENLEKTRHTLEK.R                      | 27.87 | 1854.03 | -1.7 |
| Polymerase I and transcript release factor           | tr G3V8L9 G3V8L9_RAT | L.KTKENLEKTRHTLEKR.M                     | 26.57 | 2010.13 | -0.3 |
| Polymerase I and transcript release factor           | tr G3V8L9 G3V8L9_RAT | L.SLLDKIIGAVDQI.Q                        | 29.22 | 1383.8  | -0.3 |
| Polymerase I and transcript release factor           | tr G3V8L9 G3V8L9_RAT | L.SLLDKIIGAVDQIQ.L                       | 33.66 | 1511.86 | -3.5 |
| Polymerase I and transcript release factor           | tr G3V8L9 G3V8L9_RAT | L.SLLDKIIGAVDQIQL.T                      | 41.15 | 1624.94 | 0.1  |
| Polymerase I and transcript release factor           | tr G3V8L9 G3V8L9_RAT | M(+42.01)EDVTLHIVERPY.S                  | 52.5  | 1642.8  | 0.2  |
| Polymerase I and transcript release factor           | tr G3V8L9 G3V8L9_RAT | S.GLRRVDDFKKA.F                          | 22.68 | 1303.74 | -1.8 |
| Polymerase I and transcript release factor           | tr G3V8L9 G3V8L9_RAT | T.RLVPVERREKLT.T                         | 15.15 | 1521.95 | 0.2  |
| Polymerase I and transcript release factor           | tr G3V8L9 G3V8L9_RAT | V.ERREKLTSRDKLRKSFTPD HV.V               | 21.05 | 2725.51 | 0.2  |
| Polymerase I and transcript release factor           | tr G3V8L9 G3V8L9_RAT | V.RGSLERQAGQIKKLEV.N                     | 17.05 | 1811.04 | 0.3  |
| Polypyrimidine tract binding protein 1 isoform CRA_c | tr D3ZB30 D3ZB30_RAT | M(+42.01)DGIVPDIAVGTKRGS DELF.S          | 21.96 | 2161.07 | -8.4 |
| Polyubiquitin                                        | tr Q63654 Q63654_RAT | E.STLHLVLRRLRGG.M                        | 15.72 | 1320.8  | 0.4  |
| Polyubiquitin                                        | tr Q63654 Q63654_RAT | MQIFVKTL.T                               | 28.15 | 978.557 | -1.3 |
| Polyubiquitin                                        | tr Q63654 Q63654_RAT | MQIFVKTLTGK.T                            | 23.04 | 1264.72 | -0.5 |
| Prefoldin 1                                          | tr D3ZX38 D3ZX38_RAT | M.A(+42.01)ASVDLELKKAFTE L.Q             | 50.62 | 1675.9  | -2.2 |
| Prefoldin 1                                          | tr D3ZX38 D3ZX38_RAT | M.A(+42.01)ASVDLELKKAFTE LQA.K           | 48.86 | 1875    | -3.2 |
| Prefoldin 1                                          | tr D3ZX38 D3ZX38_RAT | M.A(+42.01)ASVDLELKKAFTE LQAKVIDTQQKVKLA | 23.45 | 3155.78 | -9.7 |

|                                                         |                       |                                                                           |       |         |      |
|---------------------------------------------------------|-----------------------|---------------------------------------------------------------------------|-------|---------|------|
| Prohibitin                                              | sp P67779 PHB_RAT     | M.A(+42.01)AKVFESIGKFGLA.L                                                | 47.28 | 1478.81 | -2.7 |
| Prohibitin                                              | sp P67779 PHB_RAT     | M.A(+42.01)AKVFESIGKFGALAL.A.V                                            | 31.42 | 1662.93 | -0.6 |
| Proprotein convertase subtilisin/kexin type 1 inhibitor | tr G3V6X7 G3V6X7_RA T | R.AVPRGEAAGAVQELARALA HLLEAERQE(-.98).R                                   | 20.87 | 2953.58 | -6.5 |
| Proprotein convertase subtilisin/kexin type 1 inhibitor | tr G3V6X7 G3V6X7_RA T | R.AVPRGEAAGAVQELARALA HLLEAERQE.R                                         | 23.26 | 2954.57 | -1.3 |
| Proprotein convertase subtilisin/kexin type 1 inhibitor | tr G3V6X7 G3V6X7_RA T | R.SLSAASAPLAETSTPLRL.R                                                    | 43.72 | 1783.97 | -3.2 |
| Protachykinin-1                                         | sp P06767 TKN1_RAT    | R.ALNSVAYERSAMQNYE.R                                                      | 26.19 | 1844.84 | -2.4 |
| Protachykinin-1                                         | sp P06767 TKN1_RAT    | R.DADSSIEKQVALLKALYGHG QIS.H                                              | 30.86 | 2442.28 | -2.1 |
| Protachykinin-1                                         | sp P06767 TKN1_RAT    | R.DADSSIEKQVALLKALYGHG QISH.K                                             | 17.69 | 2579.33 | -1.2 |
| Proteasome subunit alpha type                           | tr Q6P9V6 Q6P9V6_RAT  | M(+42.01)FLTRSEYDRGVNTFS PEGRLRFQVEY.A                                    | 32.61 | 3182.51 | 3.2  |
| Proteasome subunit alpha type-5                         | sp P34064 PSA5_RAT    | Q.VEYAIIEGHKLGSTAIGIQTSE GVCLAVEKRITSPLEMPSSIEKI VEIDAHIGC(-.98)(-1.01).A | 19.28 | 5618.89 | 14.2 |
| Proteasome subunit beta type-7                          | sp Q9JHW0 PSB7_RAT    | V.TPLELEVLEEIVQTMDTS                                                      | 23.63 | 2046.01 | -1.5 |
| Protein Abracl                                          | tr D3ZSL2 D3ZSL2_RAT  | M(+42.01)NVEHEVNLLVEEIHRL.G                                               | 42.05 | 2115.08 | -0.3 |
| Protein Acin1                                           | tr E9PST5 E9PST5_RAT  | M.A(+42.01)ELEEVTLDGKPLQ ALRV.T                                           | 33.65 | 2022.1  | -2.4 |
| Protein Btf3l4                                          | tr D4A3l4 D4A3l4_RAT  | M(+42.01)NQEKLAKLQAQVR.I                                                  | 39.43 | 1697.92 | 0.9  |
| Protein C8orf37 homolog                                 | sp Q6AY71 CH037_RAT   | M.A(+42.01)KDLDELLEDEVETK F.C                                             | 40.11 | 1805.89 | -0.5 |
| Protein Col6a3                                          | tr D4A115 D4A115_RAT  | G.SVQELSELSETVLETLH.D                                                     | 21.76 | 1912.96 | -4.7 |
| Protein DEK                                             | sp Q6AXS3 DEK_RAT     | Y.NRPGTVSSLLKKNVGGQ.F                                                     | 28.83 | 1583.87 | -0.2 |
| Protein Epb4.112                                        | tr D3ZAY2 D3ZAY2_RA T | D.RPAPQFERASSKRVS.R                                                       | 16.72 | 1714.92 | -2.4 |
| Protein Epb4.112                                        | tr D3ZAY2 D3ZAY2_RA T | E.VKVEVREEK.S                                                             | 18.77 | 1114.63 | 0    |
| Protein Epb4.112                                        | tr D3ZAY2 D3ZAY2_RA T | E.VKVEVREEKS.A                                                            | 23.31 | 1201.67 | -0.1 |
| Protein Epb4.112                                        | tr D3ZAY2 D3ZAY2_RA T | H.KETELAEEGED                                                             | 23.46 | 1248.54 | 0.1  |
| Protein Epb4.112                                        | tr D3ZAY2 D3ZAY2_RA T | K.SSAEIQPAEQVRKDKKEEVIQ DIQEEKLE.G                                        | 29.57 | 3396.69 | -2.8 |
| Protein Epb4.112                                        | tr D3ZAY2 D3ZAY2_RA T | M.T(+42.01)TEVASASEVKKGS D.P                                              | 27.87 | 1549.75 | -0.7 |
| Protein Epb4.112                                        | tr D3ZAY2 D3ZAY2_RA T | M.T(+42.01)TEVASASEVKKGS DSPGAD.A                                         | 29.11 | 1976.92 | -0.2 |
| Protein Epb4.112                                        | tr D3ZAY2 D3ZAY2_RA T | M.T(+42.01)TEVASASEVKKGS DSPGADAHKEKAKEVVENE.Q                            | 49.77 | 3468.69 | -1.1 |
| Protein Epb4.112                                        | tr D3ZAY2 D3ZAY2_RA T | T.TTHITKTVKGGIS.E                                                         | 31.98 | 1341.76 | -1.1 |
| Protein Epb4.112                                        | tr D3ZAY2 D3ZAY2_RA T | E.GGAAKRETKEVQT.S                                                         | 31.52 | 1373.73 | -0.8 |
| Protein Epb4.112                                        | tr D3ZAY2 D3ZAY2_RA T | E.GGAAKRETKEVQTSELK.A                                                     | 17.88 | 1830.98 | -1.6 |
| Protein Hlcs                                            | tr D4AA38 D4AA38_RA T | F.NLETYRQNL.Q                                                             | 22.06 | 1149.58 | 10.2 |

|                      |                          |                                                                                   |       |         |      |
|----------------------|--------------------------|-----------------------------------------------------------------------------------|-------|---------|------|
| Protein Hmg111       | tr D3ZCR3 D3ZCR3_RA<br>T | I.GDVAKKLGEM(+15.99).W                                                            | 21.71 | 1062.54 | -0.3 |
| Protein Hmg111       | tr D3ZCR3 D3ZCR3_RA<br>T | M.GKGDPPKPRGKMSSYAF.F                                                             | 20.16 | 1852.96 | 1.6  |
| Protein LOC100359642 | tr M0RCH6 M0RCH6_RA<br>T | M.S(+42.01)VFGKLFAGAGGKA<br>GKGGPTPQEA.I                                          | 23.37 | 2259.16 | -0.4 |
| Protein LOC100359642 | tr M0RCH6 M0RCH6_RA<br>T | M.S(+42.01)VFGKLFAGAGGKA<br>GKGGPTPQEA.IQR.L                                      | 47.5  | 2656.41 | -0.4 |
| Protein LOC100359642 | tr M0RCH6 M0RCH6_RA<br>T | M.S(+42.01)VFGKLFAGAGGKA<br>GKGGPTPQEA.IQRL.R                                     | 26.57 | 2769.49 | -4.6 |
| Protein LOC100360645 | tr G3V9Z2 G3V9Z2_RAT     | G.MQIFVKTL.T                                                                      | 28.15 | 978.557 | -1.3 |
| Protein LOC100360645 | tr G3V9Z2 G3V9Z2_RAT     | G.MQIFVKTLTGK.T                                                                   | 23.04 | 1264.72 | -0.5 |
| Protein LOC100360872 | tr M0R9F5 M0R9F5_RAT     | L.LLPS(+79.97)GAGAEIIGGVE<br>SIPHSRPYMAHLKITTEK(+42.0<br>1)GYVTFC(-1.01)GGFLISR.Q | 18.67 | 5122.56 | -4.3 |
| Protein LOC100362339 | tr D4A6G6 D4A6G6_RA<br>T | F.SRGSKSVARRVLQA.L                                                                | 30.7  | 1513.88 | -0.4 |
| Protein LOC100362339 | tr D4A6G6 D4A6G6_RA<br>T | M.PGVTVKDQVQEFVRLA                                                                | 40.93 | 1899.02 | -0.9 |
| Protein LOC100362751 | tr D4A4D5 D4A4D5_RA<br>T | A.ALGGNSNPSAKDIKKILDSV.<br>G                                                      | 15.53 | 2026.11 | -2.5 |
| Protein LOC100362751 | tr D4A4D5 D4A4D5_RA<br>T | L.AALGGNSNPSAKDIKKILDS<br>V.G                                                     | 15.71 | 2097.14 | -0.8 |
| Protein LOC100362751 | tr D4A4D5 D4A4D5_RA<br>T | L.NGKNIEDVIAQGVGKL.A                                                              | 25.47 | 1653.9  | -1   |
| Protein LOC100362751 | tr D4A4D5 D4A4D5_RA<br>T | L.NGKNIEDVIAQGVGKLASVP<br>AGGAVAV.S                                               | 18.52 | 2533.39 | -1.8 |
| Protein LOC100362751 | tr D4A4D5 D4A4D5_RA<br>T | MRYVASYLL.A                                                                       | 16.74 | 1114.58 | -0.4 |
| Protein LOC100362751 | tr D4A4D5 D4A4D5_RA<br>T | MRYVASYLLAAL.G                                                                    | 26.93 | 1369.74 | -0.4 |
| Protein LOC100362751 | tr D4A4D5 D4A4D5_RA<br>T | V.GIEADDERLNKVISEL.N                                                              | 22.6  | 1799.93 | 2.9  |
| Protein LOC100911178 | tr D4A054 D4A054_RAT     | H.LDFKHVVFGFVKDGMMDTVR<br>KIESFGSPK(+42.01)GSVSRRIC(<br>-1.01)ITEC(-1.01)GQ.L     | 15.35 | 4712.37 | 14.6 |
| Protein LOC100911178 | tr D4A054 D4A054_RAT     | L.KHTGPGLLSM.A                                                                    | 40.92 | 1039.55 | -0.1 |
| Protein LOC100912106 | tr D4ADF5 D4ADF5_RA<br>T | M.A(+42.01)DEELEALRKQLA<br>ELQ.A                                                  | 23.29 | 2053.08 | -0.2 |
| Protein LOC361414    | tr D3ZE32 D3ZE32_RAT     | M.A(+42.01)KEGVEKAEETE.Q                                                          | 32.74 | 1360.64 | -1   |
| Protein LOC361414    | tr D3ZE32 D3ZE32_RAT     | M.A(+42.01)KEGVEKAEETE.QM<br>IEKETS.K                                             | 26.94 | 2307.08 | 0    |
| Protein LOC686807    | tr M0R665 M0R665_RAT     | I.KALVKPQAVKPKM(+15.99)P<br>KGSSRKLRS.L                                           | 27.78 | 2549.53 | -0.6 |
| Protein Mapk1ip1     | tr D3ZNX9 D3ZNX9_RA<br>T | T.PNMPLPELPRPYGA.P                                                                | 24.11 | 1550.79 | -2.8 |
| Protein Mapk1ip1     | tr D3ZNX9 D3ZNX9_RA<br>T | V.PSGPAGAPPMPGGPHSY.H                                                             | 24.77 | 1575.71 | -0.2 |
| Protein Mapk1ip1     | tr D3ZNX9 D3ZNX9_RA<br>T | V.PSGPAGAPPMPGGPHSYH                                                              | 39.84 | 1712.77 | 4.6  |
| Protein Mpo          | tr D3ZYH8 D3ZYH8_RA<br>T | F.VRWLPAEYEDGISLPG.F                                                              | 41.49 | 1890.95 | -5.8 |
| Protein Mrps36       | tr M0R776 M0R776_RAT     | K.PMSQEEMEFIQRGGPE                                                                | 37.13 | 1863.81 | 1.2  |
| Protein Naca         | tr M0R9L0 M0R9L0_RA<br>T | R.ALKNNSNDIVNAIMELTM                                                              | 20.01 | 1989.99 | -0.4 |
| Protein Nacad        | tr F1M6E5 F1M6E5_RAT     | L.ANDPMIPAALLPFRG.S                                                               | 24.58 | 1581.83 | -0.9 |
| Protein Nacad        | tr F1M6E5 F1M6E5_RAT     | L.ANDPMIPAALLPFRGSLIFQ.V                                                          | 15.1  | 2170.16 | -1.9 |

|                    |                          |                                                                          |       |         |       |
|--------------------|--------------------------|--------------------------------------------------------------------------|-------|---------|-------|
| Protein Nacad      | tr F1M6E5 F1M6E5_RAT     | L.PLRPVPADV.P                                                            | 37.75 | 962.555 | -0.6  |
| Protein Nacad      | tr F1M6E5 F1M6E5_RAT     | L.PLRPVPADVPLPTTL.E                                                      | 35.11 | 1584.92 | 5.5   |
| Protein Nacad      | tr F1M6E5 F1M6E5_RAT     | L.PLRPVPADVPLPTTLEPRIVM<br>GEET.C                                        | 18.62 | 2726.47 | 6.9   |
| Protein Nacad      | tr F1M6E5 F1M6E5_RAT     | L.PLRPVPADVPLPTTLEPRIVM<br>GEETC.Q                                       | 19    | 2829.48 | -0.7  |
| Protein Nacad      | tr F1M6E5 F1M6E5_RAT     | M.PGEAAGAEPLPEAGGSGSR<br>TDLPCDAAIATILKGDQREPHG<br>LTPGPSPLALTFL(-.98).S | 23.48 | 5430.79 | -10.8 |
| Protein Nacad      | tr F1M6E5 F1M6E5_RAT     | M.PGEAAGAEPLPEAGGSGSR<br>TDLPCDAAIATILKGDQREPHG<br>LTPGPSPLALTFL.S       | 22.65 | 5431.77 | -0.1  |
| Protein NDRG1      | sp Q6JE36 NDRG1_RAT      | M.S(+42.01)RELHDVDLAEVKP<br>LVEKGESITG.L                                 | 27.96 | 2662.38 | -1.5  |
| Protein NDRG1      | sp Q6JE36 NDRG1_RAT      | M.S(+42.01)RELHDVDLAEVKP<br>LVE.K                                        | 29.75 | 1990.04 | -1.1  |
| Protein NDRG1      | sp Q6JE36 NDRG1_RAT      | M.S(+42.01)RELHDVDLAEVKP<br>LVEKGES.I                                    | 22.46 | 2391.23 | -2.8  |
| Protein Ppp1r1c    | tr D3ZSW2 D3ZSW2_RA<br>T | M(+42.01)EPNSPKKIQF.A                                                    | 32.68 | 1359.69 | -0.7  |
| Protein Ppp1r1c    | tr D3ZSW2 D3ZSW2_RA<br>T | M(+42.01)EPNSPKKIQFAV.P                                                  | 19.25 | 1529.79 | -0.6  |
| Protein RGD1564606 | tr F1ILT35 F1ILT35_RAT   | L.APDYDALDVANKIGII                                                       | 27.3  | 1686.88 | -0.6  |
| Protein S100-A10   | sp P05942 S10A4_RAT      | M.A(+42.01)RPLEEALDVIVSTF<br>HKYSGNEGDKFKLNKT.E                          | 33.72 | 3547.83 | 4.7   |
| Protein S100-A10   | sp P05943 S10AA_RAT      | C.NDYFVVHMKQKK                                                           | 15.41 | 1535.79 | -0.5  |
| Protein S100-A10   | sp P05943 S10AA_RAT      | M.PSQM(+15.99)EHAMET.M                                                   | 16.18 | 1175.46 | -1.5  |
| Protein S100-A10   | sp P05943 S10AA_RAT      | M.PSQM(+15.99)EHAMETM(+15<br>.99).M                                      | 21.32 | 1322.49 | -2.2  |
| Protein S100-A10   | sp P05943 S10AA_RAT      | M.PSQMEHAME.T                                                            | 33.73 | 1058.42 | -0.8  |
| Protein S100-A10   | sp P05943 S10AA_RAT      | M.PSQMEHAMETM.M                                                          | 38.25 | 1290.5  | -0.4  |
| Protein S100-A10   | sp P05943 S10AA_RAT      | M.PSQMEHAMETMML.T                                                        | 23.48 | 1534.63 | 0.9   |
| Protein S100-A10   | sp P05943 S10AA_RAT      | M.PSQMEHAMETMMLT.F                                                       | 25.79 | 1635.68 | -3.5  |
| Protein S100-A10   | sp P05943 S10AA_RAT      | M.PSQMEHAMETMMLTF.H                                                      | 19.84 | 1782.75 | -1.9  |
| Protein S100-A11   | sp Q6B345 S10AB_RAT      | C.HESFLQTSQKRI                                                           | 37.8  | 1472.77 | 2.5   |
| Protein S100-A4    | sp P05942 S10A4_RAT      | M.A(+42.01)RPLEEALDVIVSTF<br>H.K                                         | 41.02 | 1837.96 | 0.9   |
| Protein S100-A4    | sp P05942 S10A4_RAT      | M.A(+42.01)RPLEEALDVIVSTF<br>HK.Y                                        | 42.55 | 1966.05 | -2.4  |
| Protein S100-A4    | sp P05942 S10A4_RAT      | M.A(+42.01)RPLEEALDVIVSTF<br>HKY.S                                       | 47.43 | 2129.12 | 8.9   |
| Protein S100-A4    | sp P05942 S10A4_RAT      | M.A(+42.01)RPLEEALDVIVSTF<br>HKYS.G                                      | 26.25 | 2216.15 | 0.5   |
| Protein S100-A4    | sp P05942 S10A4_RAT      | M.A(+42.01)RPLEEALDVIVSTF<br>HKYSG.N                                     | 43.98 | 2273.17 | -1.5  |
| Protein S100-A4    | sp P05942 S10A4_RAT      | M.A(+42.01)RPLEEALDVIVSTF<br>HKYSGNE.G                                   | 24.77 | 2516.25 | -0.8  |
| Protein S100-A4    | sp P05942 S10A4_RAT      | M.A(+42.01)RPLEEALDVIVSTF<br>HKYSGNEG.D                                  | 28.45 | 2573.28 | -6.5  |
| Protein S100-A4    | sp P05942 S10A4_RAT      | M.A(+42.01)RPLEEALDVIVSTF<br>HKYSGNEG.K                                  | 16.97 | 2688.3  | -0.9  |
| Protein S100-A4    | sp P05942 S10A4_RAT      | M.A(+42.01)RPLEEALDVIVSTF<br>HKYSGNEGDKFKLNK.T                           | 22.5  | 3446.78 | 0.1   |
| Protein S100-A4    | sp P05942 S10A4_RAT      | M.A(+42.01)RPLEEALDVIVSTF<br>HKYSGNEGDKFKLNKTEL.K                        | 25.64 | 3789.96 | -3.9  |



|                  |                      |                                                                  |       |         |      |
|------------------|----------------------|------------------------------------------------------------------|-------|---------|------|
| Protein S100-A8  | sp P50115 S10A8_RAT  | Y.HNYSGIKGNHHAL.Y                                                | 53.57 | 1446.71 | -1.4 |
| Protein S100-A8  | sp P50115 S10A8_RAT  | Y.HNYSGIKGNHHALY.R                                               | 48.55 | 1609.77 | -2.9 |
| Protein S100-A8  | sp P50115 S10A8_RAT  | M.A(+42.01)TELEKALSNVIEVY.H                                      | 15.7  | 1719.89 | -1.6 |
| Protein S100-A9  | sp P05942 S10A4_RAT  | M.A(+42.01)RPLEEALDVIVSTFHKYSGN.E                                | 22.87 | 2387.21 | -2.3 |
| Protein S100-A9  | sp P50116 S10A9_RAT  | M.A(+42.01)AKTGSQLERSISTIINVFHQY.S                               | 47.57 | 2504.3  | -0.5 |
| Protein S100-A9  | sp P50116 S10A9_RAT  | M.AAK(+42.01)TGSQLERSISTIINVFHQ.Y                                | 17.91 | 2341.24 | 1.2  |
| Protein S100-A9  | sp P50116 S10A9_RAT  | M.A(+42.01)AKTGSQLERSISTIINV.F                                   | 25.52 | 1929.05 | -3.2 |
| Protein S100-A9  | sp P50116 S10A9_RAT  | M.A(+42.01)AKTGSQLERSISTIINVFHQ.Y                                | 32.99 | 2341.24 | -0.6 |
| Protein S100-B   | sp P04631 S100B_RAT  | M.S(+42.01)ELEKAMVALIDVFH.Q                                      | 40.13 | 1742.89 | -0.4 |
| Protein S100-B   | sp P04631 S100B_RAT  | M.S(+42.01)ELEKAMVALIDVFHQ.Y                                     | 43.28 | 1870.95 | -0.9 |
| Protein S100-B   | sp P04631 S100B_RAT  | M.S(+42.01)ELEKAMVALIDVFHQY.S                                    | 54.64 | 2034.01 | -3.2 |
| Protein S100-B   | sp P04631 S100B_RAT  | M.S(+42.01)ELEKAMVALIDVFHQYSGRE.G                                | 35.89 | 2463.21 | -0.9 |
| Protein S100-B   | sp P04631 S100B_RAT  | M.S(+42.01)ELEKAMVALIDVFHQYSGREG.D                               | 48.18 | 2520.23 | -8   |
| Protein S100-B   | sp P04631 S100B_RAT  | M.S(+42.01)ELEKAMVALIDVFHQYSGREGD.K                              | 45.74 | 2635.26 | 2    |
| Protein S100-B   | sp P04631 S100B_RAT  | M.S(+42.01)ELEKAMVALIDVFHQYSGREGDK(-.98).H                       | 21.57 | 2762.37 | -0.3 |
| Protein S100-B   | sp P04631 S100B_RAT  | M.S(+42.01)ELEKAMVALIDVFHQYSGREGDK.H                             | 32.67 | 2763.35 | -0.4 |
| Protein S100-B   | sp P04631 S100B_RAT  | M.S(+42.01)ELEKAMVALIDVFHQYSGREGDKH.K                            | 20.22 | 2900.41 | -1.7 |
| Protein S100-B   | sp P04631 S100B_RAT  | M.S(+42.01)ELEKAMVALIDVFHQYSGREGDKHKHKLK.S                       | 30.77 | 3397.78 | -1.4 |
| Protein Sec61b   | tr B2RZD1 B2RZD1_RAT | M.PGPTPSATNVGSSGRSPSKAVAAR.A                                     | 33.92 | 2251.17 | -1.1 |
| Protein Sh3bgrl3 | tr B2RZ27 B2RZ27_RAT | A.VEQNTLQEFLKLA                                                  | 26.43 | 1531.82 | -0.3 |
| Protein Sh3bgrl3 | tr B2RZ27 B2RZ27_RAT | F.VEAVEQNTLQEFLKLA                                               | 24.75 | 1830.97 | -1.5 |
| Protein Sh3bgrl3 | tr B2RZ27 B2RZ27_RAT | L.QEFLKLA                                                        | 15.61 | 847.48  | -0.2 |
| Protein Sh3bgrl3 | tr B2RZ27 B2RZ27_RAT | M.S(+42.01)GLRVYSTSVTGSREI.K                                     | 30.91 | 1752.9  | -0.1 |
| Protein Sh3bgrl3 | tr B2RZ27 B2RZ27_RAT | M.S(+42.01)GLRVYSTSVTGSREIKSQQSEVTRILDGKRIQY.Q                   | 30.1  | 3883.06 | 1.1  |
| Protein Sh3bgrl3 | tr B2RZ27 B2RZ27_RAT | M.S(+42.01)GLRVYSTSVTGSREIKSQQSEVTRILDGKRIQYQL.V                 | 22.63 | 4124.2  | 0.8  |
| Protein Sh3bgrl3 | tr B2RZ27 B2RZ27_RAT | M.S(+42.01)GLRVYSTSVTGSREIKSQQSEVTRILDGKRIQYQLVDISQDNALRDEMRTL.A | 23.22 | 5981.1  | -2.1 |
| Protein Sh3bgrl3 | tr B2RZ27 B2RZ27_RAT | N.TLQEFLKLA                                                      | 37.84 | 1061.61 | -0.6 |
| Protein Sh3bgrl3 | tr B2RZ27 B2RZ27_RAT | T.SVTGSREIKSQQSEVTRILDGKRIQYQLVDISQDNALRDEMRTL.A                 | 23.27 | 5075.64 | 2.8  |
| Protein Sh3bgrl3 | tr B2RZ27 B2RZ27_RAT | Y.STSVTGSREIKSQQSEVTR.I                                          | 25.09 | 2079.06 | 0    |
| Protein Sh3bgrl3 | tr B2RZ27 B2RZ27_RAT | Y.STSVTGSREIKSQQSEVTRILDGKRIQY.Y                                 | 32.27 | 3002.61 | -0.3 |
| Protein Sh3bgrl3 | tr B2RZ27 B2RZ27_RAT | Y.STSVTGSREIKSQQSEVTRILDGKRIQY.Q                                 | 21.57 | 3165.67 | 0.5  |

|                                                                |                          |                                                                                     |       |         |       |
|----------------------------------------------------------------|--------------------------|-------------------------------------------------------------------------------------|-------|---------|-------|
| Protein Sh3bgrl3                                               | tr B2RZ27 B2RZ27_RAT     | L.AGNPKATPPQIVNGDH.Y                                                                | 25.92 | 1614.81 | -1.8  |
| Protein Sh3bgrl3                                               | tr B2RZ27 B2RZ27_RAT     | V.EQNTLQEFLKLA                                                                      | 21.1  | 1432.76 | -0.7  |
| Protein Tex15                                                  | tr D3ZYB8 D3ZYB8_RA<br>T | G.SSVCVASNATK(+42.01)QV.V                                                           | 15.46 | 1334.65 | -11.4 |
| Protein Tex15                                                  | tr D3ZYB8 D3ZYB8_RA<br>T | Y.G(+42.01)SSAINVNGTVQHT(+79.97)H.S                                                 | 15.49 | 1642.71 | 8.6   |
| Protein Thoc4                                                  | tr D3ZXH7 D3ZXH7_RA<br>T | M.A(+42.01)DKMDMSLDDIIKL.N                                                          | 36.81 | 1648.81 | -1.3  |
| Protein Tmsbl1                                                 | tr P97563 P97563_RAT     | M.S(+42.01)DKPDLSEVETFDKS<br>KLKKTNTTEEKNTLPSKETIQQE<br>KEYNQRS                     | 35.83 | 5211.61 | -5.9  |
| Protein Tns1                                                   | tr F1LN42 F1LN42_RAT     | D.PNQPASAIVNFVSKVMLSAG<br>QKR                                                       | 27.3  | 2441.32 | 3.3   |
| Protein Tns1                                                   | tr F1LN42 F1LN42_RAT     | F.DDHPVVDKIVLQKY.H                                                                  | 40.55 | 1683.85 | 5.1   |
| Protein Tns1                                                   | tr F1LN42 F1LN42_RAT     | F.ETTEESLRNYEQW.G                                                                   | 21.2  | 1846.8  | -3.1  |
| Protein Tsc22d2                                                | tr D3ZDW3 D3ZDW3_R<br>AT | A.M(+42.01)DLVKSHLMYAVR<br>EEVEVLKEQL.K                                             | 33.73 | 2800.45 | -1.9  |
| Protein Tubb4a                                                 | tr B4F7C2 B4F7C2_RAT     | G.GGTGSGMGTLISKIREEFPD<br>RIMNTF.S                                                  | 41.82 | 2926.47 | -6    |
| Protein Txndc17                                                | tr B0K010 B0K010_RAT     | M.A(+42.01)TFEEVSVLGFEEFD<br>KAVKE.H                                                | 41.89 | 2315.12 | -0.9  |
| Protein Txndc17                                                | tr B0K010 B0K010_RAT     | M.A(+42.01)TFEEVSVLGFEEFD<br>KAVKEHQGKTIF.A                                         | 35.46 | 3126.55 | -2.7  |
| Protein Txndc17                                                | tr B0K010 B0K010_RAT     | M.A(+42.01)TFEEVSVLGFEEFD<br>KAVKEHQGKTIFA.F                                        | 29.86 | 3197.59 | -3.1  |
| Protein Zmynd15                                                | tr D4A1E1 D4A1E1_RAT     | S.SLPRLQSLRVP.A                                                                     | 23.5  | 1264.76 | -4.4  |
| Purkinje cell protein 4                                        | sp P63055 PCP4_RAT       | M.S(+42.01)ERQSAGATNGKDK<br>TSGDNDGQKKVQEEFDIDMDA<br>PETERAAVAIQSQRFRKFKKK<br>AGSQS | 21.69 | 6714.26 | -0.6  |
| Purkinje cell protein 4                                        | sp P63055 PCP4_RAT       | Q.SQFRKFQKKKAGSQS                                                                   | 32.87 | 1753.96 | -0.6  |
| RCG23287 isoform<br>CRA_a                                      | tr Q6PED0 Q6PED0_RAT     | E.STLHLVLRRLRGG.A                                                                   | 15.72 | 1320.8  | 0.4   |
| RCG45400                                                       | tr G3V7C6 G3V7C6_RAT     | E.ATGGKYVPRAVLVDLEPGT<br>MDSVR.S                                                    | 35.1  | 2530.32 | 0.2   |
| RCG45400                                                       | tr G3V7C6 G3V7C6_RAT     | MREIVHLQA.G                                                                         | 31.73 | 1095.59 | -1.6  |
| Receptor expression-<br>enhancing protein 5                    | sp B2RZ37 REEP5_RAT      | A.TVNLLGDEKKST                                                                      | 24.17 | 1303.7  | -0.8  |
| Reticulon-4                                                    | tr F1LQN3 F1LQN3_RAT     | D.SP RP PPAFKYQFVTEPEDEE<br>DEEEEEDEEDEDLEEEVLE<br>RKPAAGLS.A                       | 19.99 | 5930.63 | 2.4   |
| Reticulon-4                                                    | sp Q9JK11 RTN4_RAT       | M.KESL TEVSETVAQHKEERLS.<br>A                                                       | 26.28 | 2299.17 | -0.3  |
| RGD1562416 protein                                             | tr B0BN59 B0BN59_RAT     | M.A(+42.01)GAAEDVRLFGAG<br>VRA.A                                                    | 26.79 | 1713.92 | -1.2  |
| Ribosomal protein S5<br>isoform CRA_b                          | tr B0BN81 B0BN81_RAT     | Y.AIKKKDELERVAKSNR                                                                  | 40.33 | 1884.09 | -2.2  |
| RNA-binding motif<br>single-stranded-<br>interacting protein 1 | sp Q5PQP1 RBMS1_RAT      | L.PLSMDEQELENMLKPFQQVI<br>STRVL.R                                                   | 40.81 | 2873.47 | 0.4   |
| S100 calcium binding<br>protein A6                             | tr B2GVB1 B2GVB1_RA<br>T | A.FLGALALIYNEALK                                                                    | 35    | 1534.88 | 3     |
| S100 calcium binding<br>protein A6                             | tr B2GVB1 B2GVB1_RA<br>T | E.YVAFLGALALIYNEALK                                                                 | 28.44 | 1868.04 | 1     |
| Scg2 protein                                                   | tr Q6P7R4 Q6P7R4_RAT     | R.Q(-<br>17.03)APYDNLNDKDQELGEYL<br>ARMLVKYPELMNTNQL.K                              | 30.43 | 4008.92 | -5.8  |

|                                           |                      |                                                                  |       |         |      |
|-------------------------------------------|----------------------|------------------------------------------------------------------|-------|---------|------|
| Scg2 protein                              | tr Q6P7R4 Q6P7R4_RAT | R.TNEIVVEEQYTPQSLATLESVF<br>QELGKLTGPSNQ.K                       | 27.94 | 3649.8  | -0.6 |
| Serine/arginine-rich<br>splicing factor 2 | sp Q6PDU1 SRSF2_RAT  | M.S(+42.01)YGRPPPDVEGMTS<br>LKVDNL.T                             | 47.24 | 2216.08 | -2.4 |
| Serine/arginine-rich<br>splicing factor 2 | sp Q6PDU1 SRSF2_RAT  | M.S(+42.01)YGRPPPDVEGMTS<br>LKVDNLTY.R                           | 45.65 | 2480.19 | -3.2 |
| Serine/arginine-rich<br>splicing factor 2 | sp Q6PDU1 SRSF2_RAT  | S.R(+42.01)S(+79.97)RSRSRSRS<br>RSRYRSRSKRSRTRS(+79.97)RS<br>R.S | 15.87 | 3685.86 | -3.2 |
| Serum albumin                             | sp P02770 ALBU_RAT   | A.TEGPNLVARSKEALA                                                | 36.09 | 1554.84 | -3.2 |
| Serum albumin                             | sp P02770 ALBU_RAT   | F.AEITKLATDVTKINKEC(-<br>1.01)CHGDLLC(-<br>1.01)ADDRAELAK.Y      | 21.75 | 3713.81 | 1.9  |
| Serum albumin                             | sp P02770 ALBU_RAT   | F.AKTC(-1.01)VADENAENC(-<br>1.01)DKSIHT.L                        | 15.13 | 2045.88 | 0    |
| Serum albumin                             | sp P02770 ALBU_RAT   | F.HSDICTLPDKEKQIKKQTA.L                                          | 31.93 | 2182.14 | 0.2  |
| Serum albumin                             | sp P02770 ALBU_RAT   | F.LGHYHLHEVARRHPY.F                                              | 38.32 | 1746.91 | 1    |
| Serum albumin                             | sp P02770 ALBU_RAT   | F.PNAEFAEITKL.A                                                  | 36.65 | 1231.64 | -0.1 |
| Serum albumin                             | sp P02770 ALBU_RAT   | L.AEFQPLVEEPKNLVKTNCEL.<br>Y                                     | 18.77 | 2300.17 | -0.2 |
| Serum albumin                             | sp P02770 ALBU_RAT   | L.AELVKHKPKATEDQLKT.V                                            | 37.23 | 1935.08 | 0.2  |
| Serum albumin                             | sp P02770 ALBU_RAT   | L.AELVKHKPKATEDQLKTV.M                                           | 23.38 | 2034.15 | -0.4 |
| Serum albumin                             | sp P02770 ALBU_RAT   | L.ATDVTKINKEC(-1.01)C(-<br>1.01)HGDLLCADDRAELAK.Y                | 28.22 | 3058.42 | -0.2 |
| Serum albumin                             | sp P02770 ALBU_RAT   | L.GEYGFQNAVLVR.Y                                                 | 26.3  | 1351.69 | 0.6  |
| Serum albumin                             | sp P02770 ALBU_RAT   | L.GHYLHEVARRHPY.F                                                | 35.53 | 1633.82 | 0.4  |
| Serum albumin                             | sp P02770 ALBU_RAT   | M.SQRFPAEFAEITK.L                                                | 38.01 | 1636.82 | -4.2 |
| Serum albumin                             | sp P02770 ALBU_RAT   | R.EAHKSEIAHRF.K                                                  | 32.88 | 1323.67 | 0.3  |
| Serum albumin                             | sp P02770 ALBU_RAT   | R.EAHKSEIAHRFKDLGEQH.F                                           | 26.51 | 2131.06 | -6.3 |
| Serum albumin                             | sp P02770 ALBU_RAT   | R.EAHKSEIAHRFKDLGEQHF.K                                          | 27.81 | 2278.12 | -0.1 |
| Serum albumin                             | sp P02770 ALBU_RAT   | R.EAHKSEIAHRFKDLGEQHF<br>KGLV.L                                  | 20.17 | 2675.39 | -0.4 |
| Serum albumin                             | sp P02770 ALBU_RAT   | R.FPNAEFAEITKL.A                                                 | 34.54 | 1378.71 | -3.7 |
| Serum albumin                             | sp P02770 ALBU_RAT   | V.DETYVPKEF.K                                                    | 25.66 | 1126.52 | -1.6 |
| Serum albumin                             | sp P02770 ALBU_RAT   | V.DETYVPKEFKAET.F                                                | 18.6  | 1555.74 | -1.5 |
| Serum albumin                             | sp P02770 ALBU_RAT   | Y.EEHKLVQEVTDF.A                                                 | 32.12 | 1585.8  | -0.8 |
| Serum albumin                             | sp P02770 ALBU_RAT   | Y.EKLGEGYGFQNAVLVR.Y                                             | 38.33 | 1721.91 | 0.1  |
| Serum albumin                             | sp P02770 ALBU_RAT   | Y.EYSRRHPDYSVS.L                                                 | 42.68 | 1494.69 | -1.3 |
| Serum albumin                             | sp P02770 ALBU_RAT   | Y.LSAILNRLCVLHEKTPV.S                                            | 28.88 | 1905.09 | 0.3  |
| Serum albumin                             | sp P02770 ALBU_RAT   | Y.TQKAPQVSTPTLVEA.A                                              | 43.8  | 1568.84 | 4.6  |
| Serum deprivation-<br>response protein    | sp Q66H98 SDPR_RAT   | M.G(+42.01)EDAAQAEKFQHPN<br>T.D                                  | 46.07 | 1683.75 | -2.3 |
| Stathmin                                  | sp P13668 STMN1_RAT  | A.KLERLREKDKHVEEVRKNK<br>ESKDDPADETEAD                           | 28.66 | 3720.9  | -0.3 |
| Stathmin                                  | sp P13668 STMN1_RAT  | E.RLREKDKHVEEVRKNKESK<br>DPADETEAD                               | 32.92 | 3350.68 | -2.6 |
| Stathmin                                  | sp P13668 STMN1_RAT  | E.RLREKDKHVEEVRKNKESK<br>DPADETEAD(-.98)                         | 29.29 | 3349.7  | -7.3 |
| Stathmin                                  | sp P13668 STMN1_RAT  | F.SKMAEKLTHKMEANKEN.R                                            | 49.17 | 2117.02 | -0.3 |

|                  |                     |                                                                                  |       |         |       |
|------------------|---------------------|----------------------------------------------------------------------------------|-------|---------|-------|
| Stathmin         | sp P13668 STMN1_RAT | K.LERLREKDKHVVEVRKNKES<br>KDADETEAD                                              | 25.88 | 3592.81 | -0.7  |
| Stathmin         | sp P13668 STMN1_RAT | L.REKDKHVVEVRKNKESKDP<br>ADETEAD                                                 | 38.55 | 3081.5  | -1.4  |
| Stathmin         | sp P13668 STMN1_RAT | M.A(+42.01)SSDIQVKELEKRAS<br>GQ.A                                                | 18.46 | 1886.97 | -0.7  |
| Stathmin         | sp P13668 STMN1_RAT | M.A(+42.01)SSDIQVKELEKRAS<br>GQ.A.F                                              | 52.95 | 1958.01 | -1.4  |
| Stathmin         | sp P13668 STMN1_RAT | M.A(+42.01)SSDIQVKELEKRAS<br>GQAF.E                                              | 39.23 | 2105.08 | 4.5   |
| Stathmin         | sp P13668 STMN1_RAT | M.A(+42.01)SSDIQVKELEKRAS<br>GQAFEL.I                                            | 44.3  | 2347.2  | -1.2  |
| Stathmin         | sp P13668 STMN1_RAT | M.A(+42.01)SSDIQVKELEKRAS<br>GQAFEL.L                                            | 15.46 | 2460.29 | 0     |
| Stathmin         | sp P13668 STMN1_RAT | M.AAKLERLREKDKHVVEVRK<br>NKESKDADETEAD                                           | 31.27 | 3862.98 | -0.7  |
| Stathmin         | sp P13668 STMN1_RAT | M.AAKLERLREKDKHVVEVRK<br>NKESKDADETEAD(-.98)                                     | 26.54 | 3861.99 | -2.7  |
| Stathmin         | sp P13668 STMN1_RAT | M.ASSDIQVK(+42.01)ELEKRAS<br>GQAFEL.LSPR.S                                       | 15.37 | 2913.56 | -1.4  |
| Stathmin         | sp P13668 STMN1_RAT | R.EKDKHVVEVRKNKESKDP<br>ADETEAD                                                  | 40.2  | 2925.4  | -1.7  |
| Stathmin         | sp P13668 STMN1_RAT | R.EKDKHVVEVRKNKESKDP<br>ADETEAD(-.98)                                            | 25.72 | 2924.41 | -7.8  |
| Stathmin         | sp P13668 STMN1_RAT | R.LREKDKHVVEVRKNKESK<br>DADETEAD                                                 | 36.17 | 3194.58 | 2.7   |
| Syntenin-1       | sp Q9JI92 SDCB1_RAT | M.S(+42.01)LYPSLEDLKV<br>DKVIQAQTA.S                                             | 33.01 | 2259.2  | -4.9  |
| Thioredoxin      | sp P11232 THIO_RAT  | A.AGDKLVVDF.S                                                                    | 19.54 | 1061.58 | -0.4  |
| Thioredoxin      | sp P11232 THIO_RAT  | M.VKLIESKEAFQEAL.A                                                               | 42.42 | 1603.88 | -0.9  |
| Thioredoxin      | sp P11232 THIO_RAT  | M.VKLIESKEAFQEALAAAGD<br>K.L.V                                                   | 40.74 | 2230.22 | -1.8  |
| Thioredoxin      | sp P11232 THIO_RAT  | M.VKLIESKEAFQEALAAAGD<br>K.LVVDF.S                                               | 16.46 | 2789.52 | 4.8   |
| Thymosin beta-10 | sp P63312 TYB10_RAT | D.KPDMGEIASFDKAKLKK<br>TETQEKNLPTKETIEQEK<br>RSEIS                               | 23.79 | 4705.45 | -2.5  |
| Thymosin beta-10 | sp P63312 TYB10_RAT | E.TIEQEKRSSEIS                                                                   | 34.65 | 1318.67 | -1.4  |
| Thymosin beta-10 | sp P63312 TYB10_RAT | F.DKAKLKKTTETQEKNLPT<br>.K                                                       | 16.29 | 2072.15 | -5.6  |
| Thymosin beta-10 | sp P63312 TYB10_RAT | K.LKKTETQEKNLPTKETIE<br>QEKRSSEIS                                                | 64.05 | 3187.69 | -2    |
| Thymosin beta-10 | sp P63312 TYB10_RAT | M.A(+42.01)DKPDM(+15.99)<br>GEIASFDKAKLKKTTETQE<br>KNLPTKETIEQEKRSSEIS           | 50.65 | 4949.52 | -2.7  |
| Thymosin beta-10 | sp P63312 TYB10_RAT | M.A(+42.01)DKPDMGEIAS<br>(+79.97)FDKAKLKKTTETQE<br>KNLPTKETIEQEKRSSEIS           | 22.28 | 5013.49 | 0.6   |
| Thymosin beta-10 | sp P63312 TYB10_RAT | M.A(+42.01)DKPDMGEIAS<br>FDKAKLKKTTETQEKNT                                       | 58.73 | 2963.49 | -0.7  |
| Thymosin beta-10 | sp P63312 TYB10_RAT | M.A(+42.01)DKPDMGEIAS<br>FDKAKLKKTTETQEKNTLPT<br>(+79.97)KET(+79.97)IE.Q         | 21.07 | 4135.97 | -7.6  |
| Thymosin beta-10 | sp P63312 TYB10_RAT | M.A(+42.01)DKPDMGEIAS<br>FDKAKLKKTTETQEKNTLPT<br>(+42.01)ETIEQEKRSSEIS<br>(-.98) | 30.65 | 4974.55 | -0.3  |
| Thymosin beta-10 | sp P63312 TYB10_RAT | M.A(+42.01)DKPDMGEIAS<br>FDKAKLKKTTETQEKNTLPT<br>KETIEQEKRSSEIS                  | 17.38 | 4733.41 | -12.1 |

|                  |                     |                                                                               |       |         |      |
|------------------|---------------------|-------------------------------------------------------------------------------|-------|---------|------|
| Thymosin beta-10 | sp P63312 TYB10_RAT | M.A(+42.01)DKPDMGEIASFDK<br>AKLKKKTETQEKNLPTKETIEQ<br>EKRSEIS                 | 50.69 | 4933.52 | -3.4 |
| Thymosin beta-10 | sp P63312 TYB10_RAT | M.ADK(+42.01)PDMGEIASFDK<br>AKLKKTE.T                                         | 17.02 | 2363.2  | -0.7 |
| Thymosin beta-10 | sp P63312 TYB10_RAT | M.ADK(+42.01)PDMGEIASFDK<br>AKLKKKTETQEKNLPTKETIEQ<br>EKRSEIS(-.98)           | 23.91 | 4932.54 | -4.7 |
| Thymosin beta-10 | sp P63312 TYB10_RAT | N.TLPTKETIEQEKRSE.I                                                           | 20.36 | 1787.93 | -0.2 |
| Thymosin beta-10 | sp P63312 TYB10_RAT | N.TLPTKETIEQEKRSEIS                                                           | 47.49 | 1988.04 | -1.3 |
| Thymosin beta-10 | sp P63312 TYB10_RAT | T.KETIEQEKRSEIS                                                               | 34.4  | 1575.81 | 0.1  |
| Thymosin beta-10 | sp P63312 TYB10_RAT | M.A(+42.01)DKPDMGEIASFDK<br>AK.L                                              | 46.9  | 1763.84 | -1.9 |
| Thymosin beta-10 | sp P63312 TYB10_RAT | M.A(+42.01)DKPDMGEIASFDK<br>AKLK.K                                            | 36.95 | 2005.02 | -4.1 |
| Thymosin beta-4  | sp P62329 TYB4_RAT  | D.KPDMAEIEKFDKSKLKKTTET<br>QEKNPLPSKETIEQEQQAGES                              | 18.25 | 4716.42 | -2.1 |
| Thymosin beta-4  | sp P62329 TYB4_RAT  | E.KFDKSKLKKTTETQEKNPLPS<br>KETIEQEQQAGES                                      | 23.66 | 3803    | 0.6  |
| Thymosin beta-4  | sp P62329 TYB4_RAT  | E.KNPLPSKETIEQEQQAGES                                                         | 54.08 | 2112.07 | 0    |
| Thymosin beta-4  | sp P62329 TYB4_RAT  | E.TQEKNPLPSKETIEQEQQAGE<br>S                                                  | 43.95 | 2470.22 | -0.8 |
| Thymosin beta-4  | sp P62329 TYB4_RAT  | F.DKSKLKKTTETQEKNPLPSKE<br>TIEQEQQAGES                                        | 59.29 | 3527.83 | -2.7 |
| Thymosin beta-4  | sp P62329 TYB4_RAT  | K.KTETQEKNPLPSKETIEQEQQ<br>AGES                                               | 66.79 | 2828.4  | -2.3 |
| Thymosin beta-4  | sp P62329 TYB4_RAT  | K.LKKTTETQEKNPLPSKETIEQE<br>KQAGES                                            | 54.94 | 3069.58 | -3.8 |
| Thymosin beta-4  | sp P62329 TYB4_RAT  | K.NPLPSKETIEQEQQAGES                                                          | 36.96 | 1983.97 | -2.1 |
| Thymosin beta-4  | sp P62329 TYB4_RAT  | K.SKLKKTTETQEKNPLPSKETIE<br>QEQQAGES                                          | 29.72 | 3284.71 | -2.3 |
| Thymosin beta-4  | sp P62329 TYB4_RAT  | K.TETQEKNPLPSKETIEQEQQA<br>GES                                                | 46.74 | 2700.31 | 0.6  |
| Thymosin beta-4  | sp P62329 TYB4_RAT  | M(+42.01)(+15.99)SDKPDM(+15.<br>99)AEIEKFDKSKLKKTTETQEKN<br>PLPSKETIEQEQQAGES | 15.87 | 5123.52 | 3.8  |
| Thymosin beta-4  | sp P62329 TYB4_RAT  | M.S(+42.01)DKPDM(+15.99)AEI<br>EK.F                                           | 30.18 | 1319.59 | -0.2 |
| Thymosin beta-4  | sp P62329 TYB4_RAT  | M.S(+42.01)DKPDM(+15.99)AEI<br>EKFDKSKLKKTTETQEKNPLPSK<br>ETIEQEQQAGES        | 26.71 | 4976.48 | -4.3 |
| Thymosin beta-4  | sp P62329 TYB4_RAT  | M.S(+42.01)DKPDMAEIEK.F                                                       | 32.77 | 1303.6  | -0.5 |
| Thymosin beta-4  | sp P62329 TYB4_RAT  | M.S(+42.01)DKPDMAEIEKF.D                                                      | 35.66 | 1450.66 | -1.4 |
| Thymosin beta-4  | sp P62329 TYB4_RAT  | M.S(+42.01)DKPDMAEIEKFD.K                                                     | 31.18 | 1565.69 | -0.5 |
| Thymosin beta-4  | sp P62329 TYB4_RAT  | M.S(+42.01)DKPDMAEIEKFDK.<br>S                                                | 41.28 | 1693.79 | -1.1 |
| Thymosin beta-4  | sp P62329 TYB4_RAT  | M.S(+42.01)DKPDMAEIEKFDK<br>SK.L                                              | 43.42 | 1908.91 | -1.4 |
| Thymosin beta-4  | sp P62329 TYB4_RAT  | M.S(+42.01)DKPDMAEIEKFDK<br>SKLK.K                                            | 28.19 | 2150.09 | 0.4  |
| Thymosin beta-4  | sp P62329 TYB4_RAT  | M.S(+42.01)DKPDMAEIEKFDK<br>SKLKK.T                                           | 33.38 | 2278.19 | 0.2  |
| Thymosin beta-4  | sp P62329 TYB4_RAT  | M.S(+42.01)DKPDMAEIEKFDK<br>SKLKKTE.T                                         | 35.99 | 2508.28 | -0.9 |
| Thymosin beta-4  | sp P62329 TYB4_RAT  | M.S(+42.01)DKPDMAEIEKFDK<br>SKLKKTTET.Q                                       | 39.31 | 2609.33 | -0.6 |

|                                                                |                     |                                                                               |       |         |       |
|----------------------------------------------------------------|---------------------|-------------------------------------------------------------------------------|-------|---------|-------|
| Thymosin beta-4                                                | sp P62329 TYB4_RAT  | M.S(+42.01)DKPDMAEIEKFDK<br>SKLKKTTETQE.K                                     | 32.19 | 2866.43 | -0.6  |
| Thymosin beta-4                                                | sp P62329 TYB4_RAT  | M.S(+42.01)DKPDMAEIEKFDK<br>SKLKKTTETQEKNPLPS.K                               | 18.84 | 3502.79 | -1.3  |
| Thymosin beta-4                                                | sp P62329 TYB4_RAT  | M.S(+42.01)DKPDMAEIEKFDK<br>SKLKKTTETQEKNPLPSK(+42.01)<br>)ETIEQEKQAGES(-.98) | 27.98 | 5001.51 | -1.2  |
| Thymosin beta-4                                                | sp P62329 TYB4_RAT  | M.S(+42.01)DKPDMAEIEKFDK<br>SKLKKTTETQEKNPLPSKETIEQ<br>EKQAGES                | 28.94 | 4960.49 | 2.9   |
| Thymosin beta-4                                                | sp P62329 TYB4_RAT  | M.S(+42.01)DKPDMAEIEKFDK<br>SKLKKTTETQEKNPLPSKETIEQ<br>EKQAGES(-.98)          | 22.53 | 4959.5  | -8.2  |
| Thymosin beta-4                                                | sp P62329 TYB4_RAT  | M.SDK(+42.01)PDMAEIEKFDK<br>S(+79.97)KLKKTTETQEKNPLPS<br>KETIEQEKQAGES        | 21.32 | 5040.45 | 1     |
| Thymosin beta-4                                                | sp P62329 TYB4_RAT  | M.SDK(+42.01)PDMAEIEKFDK<br>SKLKK(-.98).T                                     | 21    | 2277.2  | -14.9 |
| Thymosin beta-4                                                | sp P62329 TYB4_RAT  | M.SDK(+42.01)PDMAEIEKFDK<br>SKLKKTTETQEKNPLPSK(+42.01)<br>)ETIEQEKQAGES       | 16.67 | 5002.5  | 0.7   |
| Thymosin beta-4                                                | sp P62329 TYB4_RAT  | M.SDKPDMAEIEKFDKS(+79.97)<br>)KLKKTTETQEKNPLPSKETIEQE<br>KQAGES               | 15.33 | 4998.44 | 5.1   |
| Thymosin beta-4                                                | sp P62329 TYB4_RAT  | M.SDKPDMAEIEKFDKSKLKKTT<br>ETQEKNPLPSKETIEQEKQAGE<br>S                        | 25.78 | 4918.48 | 0.3   |
| Thymosin beta-4                                                | sp P62329 TYB4_RAT  | N.PLPSKETIEQEKQAGES                                                           | 57.99 | 1869.93 | -2.1  |
| Thymosin beta-4                                                | sp P62329 TYB4_RAT  | T.QEKNPLPSKETIEQEKQAGES                                                       | 29.85 | 2369.17 | -0.4  |
| Thymosin beta-4                                                | sp P62329 TYB4_RAT  | F.DKSKLKKTTETQEKNPLPSKE<br>T.I                                                | 36.19 | 2428.32 | 3.5   |
| Transforming growth factor beta-1-induced transcript 1 protein | sp Q99PD6 TGFI1_RAT | M(+42.01)EDLDALLSDLETTTS<br>HMSRLG.A                                          | 50.28 | 2476.15 | -3.1  |
| Transitional endoplasmic reticulum ATPase                      | sp P46462 TERA_RAT  | A.RGGNIGDGGGAADRVINQIL<br>TEMDGM.S                                            | 23.09 | 2616.24 | -0.2  |
| Transitional endoplasmic reticulum ATPase                      | sp P46462 TERA_RAT  | A.RGGNIGDGGGAADRVINQIL<br>TEMDGMSTKKNVFIIGA.T                                 | 19.76 | 3774.91 | 2.3   |
| Transitional endoplasmic reticulum ATPase                      | sp P46462 TERA_RAT  | A.TNRPDIIDPAILRPGRLDQLIY<br>IPLPDEKSRVAILKA.N                                 | 15.51 | 4179.39 | -0.4  |
| Transitional endoplasmic reticulum ATPase                      | sp P46462 TERA_RAT  | C.QANFISIKGPELL.T                                                             | 30.5  | 1428.8  | -0.3  |
| Transitional endoplasmic reticulum ATPase                      | sp P46462 TERA_RAT  | L.PLRHPALFKAIGVKPPRGI.L                                                       | 41.01 | 2066.26 | -1.9  |
| Transitional endoplasmic reticulum ATPase                      | sp P46462 TERA_RAT  | L.SQSNPSALRETVVEVPQVTW<br>EDIGGLEDVKRELQEL.V                                  | 18.66 | 4050.05 | -2.8  |
| Transitional endoplasmic reticulum ATPase                      | sp P46462 TERA_RAT  | L.VQYPVEHPDKFLKF.G                                                            | 31.02 | 1745.91 | -2.9  |
| Transitional endoplasmic reticulum ATPase                      | sp P46462 TERA_RAT  | M.A(+42.01)SGADSKGDDLSTA<br>ILKQ.K                                            | 38.38 | 1817.9  | -4    |

|                                           |                       |                                   |       |         |      |
|-------------------------------------------|-----------------------|-----------------------------------|-------|---------|------|
| Transitional endoplasmic reticulum ATPase | sp P46462 TERA_RAT    | R.PDIIDPAILRPGRLDQLIYL.P          | 28.18 | 2290.3  | -3   |
| Transitional endoplasmic reticulum ATPase | sp P46462 TERA_RAT    | V.PQVTWEDIGGLEDVKRELQE L.V        | 28.34 | 2453.24 | -2.1 |
| Transitional endoplasmic reticulum ATPase | sp P46462 TERA_RAT    | Y.PVEHPDKFLKF.G                   | 45.18 | 1355.72 | -1.3 |
| Transmembrane protein 41B                 | sp Q5FVN2 TM41B_RAT   | Y.MLSYLVGRP.V                     | 24.92 | 1034.56 | 5.4  |
| Tropomyosin alpha-1 chain                 | sp P04692 TPM1_RAT    | M(+42.01)DAIKKKMQLK.L             | 25.78 | 1505.81 | 0    |
| Tropomyosin alpha-3 chain                 | sp Q63610 TPM3_RAT    | M.A(+42.01)GSTTIEAVKRKIQV LQ.Q    | 26.03 | 1883.08 | -0.3 |
| Tropomyosin alpha-4 chain                 | sp P09495 TPM4_RAT    | I.QEMQLKEAKHIAEEADRKYE EVARKLV.I  | 29.66 | 3240.69 | -0.5 |
| Tropomyosin alpha-4 chain                 | sp P09495 TPM4_RAT    | M.A(+42.01)GLNSLEAVKRKIQ A.L      | 16.95 | 1638.94 | 0    |
| Tropomyosin alpha-4 chain                 | sp P09495 TPM4_RAT    | M.A(+42.01)GLNSLEAVKRKIQ ALQ.Q    | 27.08 | 1880.08 | 0.2  |
| Troponin I fast skeletal muscle           | tr F8WG17 F8WG17_RA T | Y.DMEVKVQKSSKELEDMNQK .L          | 50.27 | 2265.1  | -0.3 |
| Troponin I fast skeletal muscle           | sp P27768 TNNI2_RAT   | F.DLRGKFKRPPLRRVR.M               | 28.22 | 1893.16 | -1.4 |
| Troponin I fast skeletal muscle           | sp P27768 TNNI2_RAT   | L.FDLRGKFKRPPLRRVR.M              | 32    | 2040.23 | -0.1 |
| Troponin I fast skeletal muscle           | sp P27768 TNNI2_RAT   | M.G(+42.01)DEEKRNRAITARR QHLKSV.M | 17.15 | 2405.3  | 0    |
| Troponin I fast skeletal muscle           | sp P27768 TNNI2_RAT   | W.RKNIEEKSGMEGRKKMFES ES          | 29.02 | 2499.22 | 0    |
| Troponin I fast skeletal muscle           | tr F8WG17 F8WG17_RA T | C.KQLHAKIDAAEEEK.Y                | 36.94 | 1608.85 | 0.2  |
| Troponin I fast skeletal muscle           | tr F8WG17 F8WG17_RA T | M.SADAMLKALLGSKHK.V               | 26.62 | 1568.87 | 0.6  |
| Troponin I fast skeletal muscle           | tr F8WG17 F8WG17_RA T | Y.DMEVKVQKSSKELEDMNQK L.F         | 31.79 | 2378.18 | 1    |
| Troponin T fast skeletal muscle           | sp P09739 TNNT3_RAT   | L.RSRIDQAQKHSKKAGATAK GKVGGRWK    | 25.23 | 2948.66 | -0.3 |
| Tubulin alpha-1A chain                    | sp P68370 TBA1A_RAT   | A.TYAPVISA EKAY.H                 | 31.12 | 1311.67 | 0.3  |
| Tubulin alpha-1A chain                    | sp P68370 TBA1A_RAT   | A.VFVDLEPTVIDEVR.T                | 17.09 | 1629.86 | -0.7 |
| Tubulin alpha-1A chain                    | sp P68370 TBA1A_RAT   | D.LEPTVIDEVR.T                    | 17.46 | 1169.63 | -0.3 |
| Tubulin alpha-1A chain                    | sp P68370 TBA1A_RAT   | F.HPEQLITGKEDAANN.Y               | 33.32 | 1635.79 | -0.6 |
| Tubulin alpha-1A chain                    | sp P68370 TBA1A_RAT   | F.HPEQLITGKEDAANNY.A              | 50.78 | 1798.85 | -1.8 |
| Tubulin alpha-1A chain                    | sp P68370 TBA1A_RAT   | F.VDLEPTVIDEVR.T                  | 34.27 | 1383.72 | 0.7  |
| Tubulin alpha-1A chain                    | sp P68370 TBA1A_RAT   | G.AGKHVPRAVFVDLEPTVIDE VR.T       | 29.37 | 2446.33 | -3.2 |
| Tubulin alpha-1A chain                    | sp P68370 TBA1A_RAT   | M.LSNTTAAIEAWARLD.H               | 19.38 | 1630.83 | -3.5 |
| Tubulin alpha-1A chain                    | sp P68370 TBA1A_RAT   | P.RAVFVDLEPTVIDEVR.T              | 23.53 | 1857    | -1   |
| Tubulin alpha-1A chain                    | sp P68370 TBA1A_RAT   | Q.VSTAVVEPYNSILTTHTT.L            | 43.92 | 1931.98 | -0.7 |
| Tubulin alpha-1A chain                    | sp P68370 TBA1A_RAT   | R.AVFVDLEPTVIDEVR.T               | 25.91 | 1700.9  | -0.6 |
| Tubulin alpha-1A chain                    | sp P68370 TBA1A_RAT   | R.FDGALNVDLTEFQTNLVPYP RIHFPLA.T  | 20.16 | 3086.59 | -3.8 |
| Tubulin alpha-1A chain                    | sp P68370 TBA1A_RAT   | T.YAPVISA EKAYHEQLS.V             | 36.3  | 1804.9  | -0.6 |

|                        |                     |                                                                                      |       |         |       |
|------------------------|---------------------|--------------------------------------------------------------------------------------|-------|---------|-------|
| Tubulin alpha-1A chain | sp P68370 TBA1A_RAT | V.P(+42.01)KDVNAAIATIKTKR<br>TIQFVDWCPTGFKVGINYQPPT<br>(+79.97)VVPGGDLAKVQRAVC.<br>M | 18.16 | 5731.98 | 4.3   |
| Tubulin alpha-1A chain | sp P68370 TBA1A_RAT | Y.APVISA EKAYHEQ.L                                                                   | 24.57 | 1441.72 | -1.5  |
| Tubulin alpha-1A chain | sp P68370 TBA1A_RAT | Y.APVISA EKAYHEQLS.V                                                                 | 47.98 | 1641.84 | -0.8  |
| Tubulin alpha-1A chain | sp P68370 TBA1A_RAT | Y.ARGHYTIGKEIIDLVLDRIK<br>L.A                                                        | 38.64 | 2578.51 | -0.6  |
| Tubulin alpha-1A chain | sp P68370 TBA1A_RAT | Y.QPPTVVPGGDLAKVQR.A                                                                 | 26.92 | 1660.93 | -0.2  |
| Tubulin alpha-1A chain | sp P68370 TBA1A_RAT | Y.QPPTVVPGGDLAKVQRA.V                                                                | 33.97 | 1731.96 | -1.4  |
| Tubulin alpha-1A chain | sp P68370 TBA1A_RAT | Y.RGDVVPKDVNAAIATIKTKR<br>TIQ.F                                                      | 27.38 | 2493.44 | -5    |
| Tubulin alpha-1B chain | sp Q6P9V9 TBA1B_RAT | A.TYAPVISA EKAYHEQ.L                                                                 | 38.06 | 1705.83 | -0.9  |
| Tubulin alpha-1B chain | sp Q6P9V9 TBA1B_RAT | A.TYAPVISA EKAYHEQLS                                                                 | 39.56 | 1818.92 | -1.2  |
| Tubulin alpha-1B chain | sp Q6P9V9 TBA1B_RAT | A.TYAPVISA EKAYHEQLS.V                                                               | 41.36 | 1905.95 | -1    |
| Tubulin alpha-1B chain | sp Q6P9V9 TBA1B_RAT | A.TYAPVISA EKAYHEQLSVAEI<br>TN.A                                                     | 18.2  | 2533.27 | -1.1  |
| Tubulin alpha-1B chain | sp Q6P9V9 TBA1B_RAT | D.IERPTYTNLNR.L                                                                      | 28.85 | 1375.72 | -1.6  |
| Tubulin alpha-1B chain | sp Q6P9V9 TBA1B_RAT | E.KDYEEVGVDSVEGEGEEEGE<br>EY                                                         | 35.47 | 2475.99 | -0.8  |
| Tubulin alpha-1B chain | sp Q6P9V9 TBA1B_RAT | L.VPYPRHFPLA.T                                                                       | 24.25 | 1308.73 | -1.3  |
| Tubulin alpha-1B chain | sp Q6P9V9 TBA1B_RAT | N.SILTTHTTLEH.S                                                                      | 30.56 | 1251.65 | -1.1  |
| Tubulin alpha-1B chain | sp Q6P9V9 TBA1B_RAT | R.TGTYRQLFHPEQLITGKEDA<br>ANNY.A                                                     | 25.65 | 2765.34 | -1.7  |
| Tubulin alpha-1B chain | sp Q6P9V9 TBA1B_RAT | S.AEKAYHEQLSVAEITN.A                                                                 | 17.1  | 1801.88 | -2.3  |
| Tubulin alpha-1B chain | sp Q6P9V9 TBA1B_RAT | T.YAPVISA EKAYHEQLS                                                                  | 33.77 | 1717.87 | -0.2  |
| Tubulin alpha-1B chain | sp Q6P9V9 TBA1B_RAT | V.FVDLEPTVIDEVR.T                                                                    | 36.11 | 1530.79 | -0.1  |
| Tubulin alpha-1B chain | sp Q6P9V9 TBA1B_RAT | Y.Q(-<br>17.03)PPTVVPGGDLAKVQR.A                                                     | 23.32 | 1643.9  | -1    |
| Tubulin alpha-1B chain | sp Q6P9V9 TBA1B_RAT | Y.RQLFHPEQLITGKEDAANN.<br>Y                                                          | 20.48 | 2180.1  | -4.3  |
| Tubulin alpha-1B chain | sp Q6P9V9 TBA1B_RAT | Y.RQLFHPEQLITGKEDAANNY<br>.A                                                         | 36.07 | 2343.16 | -1.8  |
| Tubulin alpha-3 chain  | sp Q68FR8 TBA3_RAT  | Y.RQLFHPEQLITGKEDAANNY<br>ARGHYTIGK(+42.01)EIVDLVL<br>DRIRK(+42.01)LADLC(-1.01)T.G   | 18.43 | 5475.86 | 7.2   |
| Tubulin alpha-8 chain  | sp Q6AY56 TBA8_RAT  | R.IRKLTDACS(+79.97)GLQGFLI<br>FHS(+79.97)FGGGTSGGFTSLL<br>MERL.S                     | 15.95 | 3975.88 | -9.3  |
| Tubulin alpha-8 chain  | sp Q6AY56 TBA8_RAT  | R.IRKL(+79.97)DACS(+79.97)G<br>LQGFLIFHSFGGGTSGGFTSLL<br>MERL.S                      | 19.32 | 3975.88 | -1.2  |
| Tubulin alpha-8 chain  | sp Q6AY56 TBA8_RAT  | Y.APIVSA EKAYHEQLS(-.98).V                                                           | 18.51 | 1640.85 | 2     |
| Tubulin beta-2A chain  | sp P85108 TBB2A_RAT | F.SVMPSPKVSDTVVEPY.N                                                                 | 32.74 | 1733.85 | -2    |
| Tubulin beta-2A chain  | sp P85108 TBB2A_RAT | F.SVMPSPKVSDTVVEPYNA.T                                                               | 25.44 | 1918.93 | -5.3  |
| Tubulin beta-2A chain  | sp P85108 TBB2A_RAT | F.SVMPSPKVSDTVVEPYNATL<br>SVHQL.V                                                    | 22.01 | 2697.37 | -1.3  |
| Tubulin beta-2A chain  | sp P85108 TBB2A_RAT | L.T(+42.01)QQMFDSKNM(+15.9<br>9)MAACDPRHGRYLTVAIFRG<br>R(-.98).M                     | 15.77 | 3627.74 | -11.8 |
| Tubulin beta-2A chain  | sp P85108 TBB2A_RAT | W.AKGHYTEGAELVDSVLDVV<br>RKE.S                                                       | 15.38 | 2414.24 | -8.8  |



|                       |                     |                                                   |       |         |      |
|-----------------------|---------------------|---------------------------------------------------|-------|---------|------|
| Tubulin beta-3 chain  | sp Q4QRB4 TBB3_RAT  | G.GGTGSGMGTLLISK.V                                | 39.32 | 1277.66 | -1.5 |
| Tubulin beta-3 chain  | sp Q4QRB4 TBB3_RAT  | H.SLGGGTGSGMGTLLISK.V                             | 36.81 | 1534.8  | -1.4 |
| Tubulin beta-3 chain  | sp Q4QRB4 TBB3_RAT  | W.AKGHYTEGAELVDSVLDVV<br>RKE.C                    | 15.38 | 2414.24 | -8.8 |
| Tubulin beta-3 chain  | sp Q4QRB4 TBB3_RAT  | W.AKGHYTEGAELVDSVLDVV<br>RKEC(-1.01)ENC(-1.01)D.C | 24.14 | 2976.36 | -2.1 |
| Tubulin beta-4B chain | sp Q6P9T8 TBB4B_RAT | A.DLRKLAVNMVPPRLHF.F                              | 48.74 | 2052.15 | -1.2 |
| Tubulin beta-5 chain  | sp P69897 TBB5_RAT  | A.DLRKLAVNMVPPRLHFF.M                             | 43.39 | 2199.21 | 0.2  |
| Tubulin beta-5 chain  | sp P69897 TBB5_RAT  | E.ATGGKYVPRAILVDLEPGTM<br>DSVR.S                  | 31.27 | 2544.34 | 0.8  |
| Tubulin beta-5 chain  | sp P69897 TBB5_RAT  | F.GQSGAGNNWAKGHYTEGAE<br>LVDSVLDVVR.K             | 34.36 | 3028.46 | -9.3 |
| Tubulin beta-5 chain  | sp P69897 TBB5_RAT  | F.SVVPSPKVSDTVVEPYN.A                             | 46.62 | 1815.93 | -1.4 |
| Tubulin beta-5 chain  | sp P69897 TBB5_RAT  | F.SVVPSPKVSDTVVEPYN.A.T                           | 28.71 | 1886.96 | -1.9 |
| Tubulin beta-5 chain  | sp P69897 TBB5_RAT  | F.SVVPSPKVSDTVVEPYNATL.<br>S                      | 34.22 | 2101.09 | -1.5 |
| Tubulin beta-5 chain  | sp P69897 TBB5_RAT  | F.SVVPSPKVSDTVVEPYNATL<br>SVHQL.V                 | 20.88 | 2665.4  | -3.9 |
| Tubulin beta-5 chain  | sp P69897 TBB5_RAT  | F.SVVPSPKVSDTVVEPYNATL<br>SVHQLVE.N               | 16.78 | 2893.51 | -4.7 |
| Tubulin beta-5 chain  | sp P69897 TBB5_RAT  | F.VFGQSGAGNNWAKGHYTEG<br>AELVDSVLDVV.R            | 38.37 | 3118.5  | 0    |
| Tubulin beta-5 chain  | sp P69897 TBB5_RAT  | F.VFGQSGAGNNWAKGHYTEG<br>AELVDSVLDVVR.K           | 34.37 | 3274.6  | -1.7 |
| Tubulin beta-5 chain  | sp P69897 TBB5_RAT  | G.GGTGSGMGTLLISK.I                                | 39.32 | 1277.66 | -1.5 |
| Tubulin beta-5 chain  | sp P69897 TBB5_RAT  | G.GGTGSGMGTLLISK.I.R                              | 15.93 | 1390.75 | -8.3 |
| Tubulin beta-5 chain  | sp P69897 TBB5_RAT  | G.GGTGSGMGTLLISKIREEYPD<br>RIMNTF.S               | 47.07 | 2942.46 | -0.6 |
| Tubulin beta-5 chain  | sp P69897 TBB5_RAT  | G.SGMGTLLISKIREEYPDRIMN<br>TF.S                   | 45.13 | 2670.35 | -1.9 |
| Tubulin beta-5 chain  | sp P69897 TBB5_RAT  | H.SLGGGTGSGMGTLLISK.I                             | 36.81 | 1534.8  | -1.4 |
| Tubulin beta-5 chain  | sp P69897 TBB5_RAT  | H.SLGGGTGSGMGTLLISKIREE<br>YPDRIMNTF.S            | 21.15 | 3199.6  | -0.5 |
| Tubulin beta-5 chain  | sp P69897 TBB5_RAT  | H.YTEGAELVDSVLDVVR.K                              | 28.92 | 1763.89 | -0.5 |
| Tubulin beta-5 chain  | sp P69897 TBB5_RAT  | K.IREEYPDRIMNT.F                                  | 17.87 | 1535.74 | -2.6 |
| Tubulin beta-5 chain  | sp P69897 TBB5_RAT  | K.LTTPTYGDLNHLVSA.A                               | 19.07 | 1529.77 | 0.2  |
| Tubulin beta-5 chain  | sp P69897 TBB5_RAT  | K.LTTPTYGDLNHLVSATMSGV<br>T.T                     | 24.78 | 2177.07 | -3.1 |
| Tubulin beta-5 chain  | sp P69897 TBB5_RAT  | K.LTTPTYGDLNHLVSATMSGV<br>TT.C                    | 34.46 | 2278.12 | -4.1 |
| Tubulin beta-5 chain  | sp P69897 TBB5_RAT  | L.KLTTPTYGDLNHLVSA.T                              | 33.79 | 1728.9  | 0.6  |
| Tubulin beta-5 chain  | sp P69897 TBB5_RAT  | L.THSLGGGTGSGMGTLLISKIR<br>EEYPDRIMNTF.S          | 44.48 | 3437.71 | 2.8  |
| Tubulin beta-5 chain  | sp P69897 TBB5_RAT  | L.TTPTYGDLNHLVSATMSGVT<br>T.C                     | 36.61 | 2165.03 | 0.7  |
| Tubulin beta-5 chain  | sp P69897 TBB5_RAT  | L.TVPELTQQVFDKNN.M                                | 30.59 | 1719.85 | -0.2 |
| Tubulin beta-5 chain  | sp P69897 TBB5_RAT  | M.REIVHIQA.G                                      | 21.88 | 964.545 | 0    |
| Tubulin beta-5 chain  | sp P69897 TBB5_RAT  | MREIVHI.Q                                         | 17.29 | 896.49  | 0.3  |
| Tubulin beta-5 chain  | sp P69897 TBB5_RAT  | MREIVHIQA.G                                       | 31.73 | 1095.59 | -1.6 |
| Tubulin beta-5 chain  | sp P69897 TBB5_RAT  | MREIVHIQAGQ(-.98).C                               | 26.9  | 1279.68 | -0.5 |

|                                                           |                       |                                                        |       |         |      |
|-----------------------------------------------------------|-----------------------|--------------------------------------------------------|-------|---------|------|
| Tubulin beta-5 chain                                      | sp P69897 TBB5_RAT    | MREIVHIQAGQ.C                                          | 22.46 | 1280.67 | 1    |
| Tubulin beta-5 chain                                      | sp P69897 TBB5_RAT    | R.AILVDLEPGTMDSVR.S                                    | 37.54 | 1614.83 | -2.6 |
| Tubulin beta-5 chain                                      | sp P69897 TBB5_RAT    | R.GRMSMKEVDEQMLNVQNK(+42.01)NSS(+79.97)YFVEWIPN NVKT.A | 15.14 | 4036.85 | 6.9  |
| Tubulin beta-5 chain                                      | sp P69897 TBB5_RAT    | R.SGPFQIFRPDNF.V                                       | 34.7  | 1480.71 | -2.3 |
| Tubulin beta-5 chain                                      | sp P69897 TBB5_RAT    | R.SGPFQIFRPDNFV.F                                      | 29.42 | 1726.85 | -0.1 |
| Tubulin beta-5 chain                                      | sp P69897 TBB5_RAT    | R.SGPFQIFRPDNFVFGQSGAG NNW.A                           | 40.71 | 2598.2  | -0.5 |
| Tubulin beta-5 chain                                      | sp P69897 TBB5_RAT    | S.GPFGQIFRPDNF.V                                       | 34.73 | 1393.68 | 1.6  |
| Tubulin beta-5 chain                                      | sp P69897 TBB5_RAT    | T.HSLGGGTGSGMGTLISKIRE EYPRIMNT.F                      | 21.38 | 3189.59 | -2   |
| Tubulin beta-5 chain                                      | sp P69897 TBB5_RAT    | T.HSLGGGTGSGMGTLISKIRE EYPRIMNT.F.S                    | 22.14 | 3336.66 | -2.1 |
| Tubulin beta-5 chain                                      | sp P69897 TBB5_RAT    | T.TPTYGDLNHLVSATMSGVTT .C                              | 39.11 | 2063.98 | -1.7 |
| Tubulin beta-5 chain                                      | sp P69897 TBB5_RAT    | V.RSGPFQIFRPDNFVFGQSGA GNNW.A                          | 18.41 | 2754.31 | -3.8 |
| Tubulin beta-5 chain                                      | sp P69897 TBB5_RAT    | W.AKGHYTEGAELVDSVLDVV .R                               | 19.89 | 2001.01 | -0.4 |
| Tubulin beta-5 chain                                      | sp P69897 TBB5_RAT    | W.AKGHYTEGAELVDSVLDVV R.K                              | 28.02 | 2157.11 | -1.7 |
| Tubulin beta-5 chain                                      | sp P69897 TBB5_RAT    | W.AKGHYTEGAELVDSVLDVV RKE.A                            | 15.38 | 2414.24 | -8.8 |
| Tubulin beta-5 chain                                      | sp P69897 TBB5_RAT    | W.AKGHYTEGAELVDSVLDVV RKEAESC                          | 26.27 | 2701.36 | 8.2  |
| Tubulin beta-5 chain                                      | sp P69897 TBB5_RAT    | W.AKGHYTEGAELVDSVLDVV RKEAESC(-1.01)DC(-1.01)L.Q       | 22    | 3133.47 | -2.4 |
| Tubulin beta-5 chain                                      | sp P69897 TBB5_RAT    | W.AKGHYTEGAELVDSVLDVV RKEAESC.D                        | 23.38 | 2919.39 | -0.5 |
| Tubulin beta-5 chain                                      | sp P69897 TBB5_RAT    | Y.TEGAELVDSVLDVV.R.K                                   | 19.32 | 1600.83 | -4.6 |
| Tubulin polymerization-promoting protein family member 3  | sp Q5PPN5 TPPP3_RAT   | F.KKALEELATKR.F                                        | 34.68 | 1285.77 | 0.3  |
| Tubulin polymerization-promoting protein family member 3  | sp Q5PPN5 TPPP3_RAT   | F.SKVKAKSARVINYEE.F                                    | 17.66 | 1720.95 | -0.9 |
| Tubulin polymerization-promoting protein family member 3  | sp Q5PPN5 TPPP3_RAT   | M.A(+42.01)ASTDIAGLEESFRK FA.I                         | 27.1  | 1853.92 | 1.4  |
| Tubulin polymerization-promoting protein family member 3  | sp Q5PPN5 TPPP3_RAT   | M.A(+42.01)ASTDIAGLEESFRK FAL.H                        | 27.68 | 1967    | -2.1 |
| Tubulin polymerization-promoting protein family member 3  | sp Q5PPN5 TPPP3_RAT   | M.A(+42.01)ASTDIAGLEESFRK. F                           | 39.18 | 1635.81 | -2.6 |
| Tubulin polymerization-promoting protein family member 3  | sp Q5PPN5 TPPP3_RAT   | M.A(+42.01)ASTDIAGLEESFRK F.A                          | 44.7  | 1782.88 | 0.2  |
| Tyrosine-protein kinase receptor                          | tr G3V6A0 G3V6A0_RA T | E.GRHIYIY.V                                            | 20.74 | 920.487 | 9.9  |
| Ubiquitin A-52 residue ribosomal protein fusion product 1 | tr Q6P7R7 Q6P7R7_RAT  | E.STLHLVLRLLRGG.I                                      | 15.72 | 1320.8  | 0.4  |
| Ubiquitin carboxyl-terminal hydrolase isozyme L1          | sp Q00981 UCHL1_RAT   | C.GTIGLIHAV.A                                          | 28.26 | 879.518 | -0.9 |

|                                                  |                          |                                                                         |       |         |      |
|--------------------------------------------------|--------------------------|-------------------------------------------------------------------------|-------|---------|------|
| Ubiquitin carboxyl-terminal hydrolase isozyme L1 | sp Q00981 UCHL1_RAT      | F.PLTAQHENFRKKQIEEL.K                                                   | 19.6  | 2080.11 | -0.5 |
| Ubiquitin carboxyl-terminal hydrolase isozyme L1 | sp Q00981 UCHL1_RAT      | F.PLTAQHENFRKKQIEELKGQ<br>EVSPKVYFM.K                                   | 16.7  | 3473.81 | 0.5  |
| Ubiquitin carboxyl-terminal hydrolase isozyme L1 | sp Q00981 UCHL1_RAT      | L.KPMEINPEMLNKVLAKLGV<br>AGQWRF.A                                       | 33.99 | 2868.55 | -4.1 |
| Ubiquitin carboxyl-terminal hydrolase isozyme L1 | sp Q00981 UCHL1_RAT      | M(+15.99)QLKPMEINPEMLNK<br>VLAKLGVAGQWRF.A                              | 23.97 | 3256.73 | -6.4 |
| Ubiquitin carboxyl-terminal hydrolase isozyme L1 | sp Q00981 UCHL1_RAT      | MQLKPMEINPEML.N                                                         | 33.78 | 1572.77 | -2   |
| Ubiquitin carboxyl-terminal hydrolase isozyme L1 | sp Q00981 UCHL1_RAT      | MQLKPMEINPEMLNKVLAK.L                                                   | 22.44 | 2226.19 | 1.7  |
| Ubiquitin carboxyl-terminal hydrolase isozyme L1 | sp Q00981 UCHL1_RAT      | MQLKPMEINPEMLNKVLAKL.<br>G                                              | 32.94 | 2339.28 | -1.5 |
| Ubiquitin carboxyl-terminal hydrolase isozyme L1 | sp Q00981 UCHL1_RAT      | MQLKPMEINPEMLNKVLAKLG<br>VAGQWRF.A                                      | 41.58 | 3240.73 | 1.9  |
| Ubiquitin carboxyl-terminal hydrolase isozyme L1 | sp Q00981 UCHL1_RAT      | P.M(+42.01)EINPEMLNKVLAK<br>L.G                                         | 27.86 | 1783.96 | -4.3 |
| Ubiquitin carboxyl-terminal hydrolase isozyme L1 | sp Q00981 UCHL1_RAT      | L.KPMEINPEMLNKVLAKL.G                                                   | 42.96 | 1967.09 | -1.2 |
| Ubiquitin-like-conjugating enzyme ATG3           | sp Q6AZ50 ATG3_RAT       | M(+42.01)QNVINTVKGKALEV.<br>A                                           | 30.43 | 1684.92 | 1.4  |
| Uncharacterized protein                          | tr M0R3Z1 M0R3Z1_RA<br>T | G.YEEAEGQILERLIEKES.Q                                                   | 20.02 | 2035.01 | -0.9 |
| Uncharacterized protein                          | tr M0RD14 M0RD14_RA<br>T | M.PKPDSEAGTAFIQTQQL.H                                                   | 28.75 | 1829.92 | -0.5 |
| Uncharacterized protein                          | tr D3ZET5 D3ZET5_RAT     | M.GFVKVVKNK.A.Y                                                         | 24.55 | 1088.67 | -0.6 |
| Uncharacterized protein                          | tr D4A5H3 D4A5H3_RA<br>T | M.A(+42.01)DQLTEEQIAEFKEA<br>FSLFDKDG.D                                 | 31.51 | 2672.25 | -0.1 |
| Uncharacterized protein                          | tr D4A5H3 D4A5H3_RA<br>T | M.A(+42.01)DQLTEEQIAEFKEA<br>FSLFDKDG.DG.T                              | 33.2  | 2844.3  | -4.9 |
| Uncharacterized protein                          | tr D4A5H3 D4A5H3_RA<br>T | M.A(+42.01)DQLTEEQIAEFKEA<br>FSLFDKDG.DGTTITTKELGTVM<br>R.S             | 30.6  | 4175.03 | -5.6 |
| Uncharacterized protein                          | tr F1LWR6 F1LWR6_RA<br>T | G.M(+42.01)QKGDLFKA.EY.V                                                | 24.86 | 1370.65 | 0.7  |
| Uncharacterized protein                          | tr F1LWR6 F1LWR6_RA<br>T | G.M(+42.01)QKGDLFKA.EYV.F                                               | 19.04 | 1469.72 | -1.4 |
| Uncharacterized protein                          | tr F1M3Q4 F1M3Q4_RA<br>T | D.PGDSDIIRSMPEQTGEK                                                     | 26.11 | 1858.87 | 0.3  |
| Uncharacterized protein                          | tr F8WFR3 F8WFR3_RA<br>T | C.PLLKPWAL.T                                                            | 25.3  | 936.58  | -0.7 |
| Uncharacterized protein                          | tr M0R5B4 M0R5B4_RA<br>T | L.AKVQRAVCMLRNT(+79.97)T<br>AIAEAWARLDHKFDPM(+15.99)<br>)YAK(+42.01)R.A | 15.55 | 4098.03 | -2.2 |
| Uncharacterized protein                          | tr M0R734 M0R734_RAT     | F.KQKQKEEQKKLEEL.K                                                      | 41.39 | 1785    | -0.8 |
| Uncharacterized protein                          | tr M0R9D5 M0R9D5_RA<br>T | A.EGPEVDVSLPKADL.D                                                      | 17.21 | 1467.75 | 0.1  |

|                                                                 |                          |                                               |       |         |      |
|-----------------------------------------------------------------|--------------------------|-----------------------------------------------|-------|---------|------|
| Uncharacterized protein                                         | tr M0R9D5 M0R9D5_RA<br>T | A.PKISMPNIDL.N                                | 28.17 | 1126.61 | 0.4  |
| Uncharacterized protein                                         | tr M0R9D5 M0R9D5_RA<br>T | D.APDVVDVQGPDWHL.K                            | 32.08 | 1447.67 | 1    |
| Uncharacterized protein                                         | tr M0R9D5 M0R9D5_RA<br>T | F.KAPKISMPNIDL.N                              | 38.35 | 1325.74 | 0.3  |
| Uncharacterized protein                                         | tr M0R9D5 M0R9D5_RA<br>T | H.KISMPDVGLNL.K                               | 21.25 | 1185.64 | -0.1 |
| Uncharacterized protein                                         | tr M0R9D5 M0R9D5_RA<br>T | I.KGPKVDIDVPDVVDVQGPDW<br>HL.K                | 18.67 | 2328.18 | 1    |
| Uncharacterized protein                                         | tr M0R9D5 M0R9D5_RA<br>T | K.GPKFKMPEMNIKAPKIS.M                         | 21.39 | 1915.04 | 0.2  |
| Uncharacterized protein                                         | tr M0R9D5 M0R9D5_RA<br>T | L.KGPGVDLPSVDL.S                              | 21.21 | 1195.64 | -0.3 |
| Uncharacterized protein                                         | tr M0R9D5 M0R9D5_RA<br>T | L.KMPKVKMPK.F                                 | 23.38 | 1085.65 | -2.4 |
| Uncharacterized protein                                         | tr M0R9D5 M0R9D5_RA<br>T | M.NIKAPKISMPNIDL.N                            | 37.32 | 1552.86 | -1.6 |
| Uncharacterized protein                                         | tr M0RAX7 M0RAX7_R<br>AT | F.KDAASVDKVLEL.K                              | 21.43 | 1286.71 | 0.1  |
| Uncharacterized protein                                         | tr M0RC66 M0RC66_RA<br>T | V.NAEGSVDTVFSQVCTYLDL<br>K                    | 28.01 | 2275.07 | -0.6 |
| Vesicle-associated<br>membrane protein-<br>associated protein B | sp Q9Z269 VAPB_RAT       | M.A(+42.01)KVEQVLSLEPQHE<br>L.K               | 42.91 | 1760.93 | -6.4 |
| Vesicle-associated<br>membrane protein-<br>associated protein B | sp Q9Z269 VAPB_RAT       | M.A(+42.01)KVEQVLSLEPQHE<br>LK.F              | 19.25 | 1889.03 | -0.8 |
| Vesicle-associated<br>membrane protein-<br>associated protein B | sp Q9Z269 VAPB_RAT       | M.A(+42.01)KVEQVLSLEPQHE<br>LKF.R             | 37.16 | 2036.09 | -1.5 |
| Vesicle-associated<br>membrane protein-<br>associated protein B | sp Q9Z269 VAPB_RAT       | M.A(+42.01)KVEQVLSLEPQHE<br>LKFRGPFTDVVTT.N   | 29.71 | 3109.64 | 3.8  |
| Vesicle-associated<br>membrane protein-<br>associated protein B | sp Q9Z269 VAPB_RAT       | M.A(+42.01)KVEQVLSLEPQHE<br>LKFRGPFTDVVTTNL.K | 25.89 | 3336.77 | -3.7 |
| Vimentin                                                        | sp P31000 VIME_RAT       | A.AKNLQEAEEWYKSKFADLS.<br>E                   | 28.24 | 2256.11 | -0.7 |
| Vimentin                                                        | sp P31000 VIME_RAT       | A.AKNLQEAEEWYKSKFADLS<br>E.A                  | 29.2  | 2385.15 | -0.6 |
| Vimentin                                                        | sp P31000 VIME_RAT       | A.ANYQDTIGRLQDEIQNM.K                         | 32.09 | 2007.93 | -1.4 |
| Vimentin                                                        | sp P31000 VIME_RAT       | A.RLDLERKVESLQEEIA.F                          | 20.95 | 1927.04 | -1.1 |
| Vimentin                                                        | sp P31000 VIME_RAT       | A.YVTRSSAVRLR.S                               | 31.52 | 1306.75 | -1.1 |
| Vimentin                                                        | sp P31000 VIME_RAT       | C.EVDALKGTNESLERQMREM<br>EENF.A               | 27.77 | 2754.26 | -1.3 |
| Vimentin                                                        | sp P31000 VIME_RAT       | D.GQVINETSQHDDLE                              | 31.65 | 1720.77 | -0.4 |
| Vimentin                                                        | sp P31000 VIME_RAT       | E.SLPLVDTH.S                                  | 24.4  | 880.465 | 0.5  |
| Vimentin                                                        | sp P31000 VIME_RAT       | E.SLPLVDTHSKR.T                               | 19.18 | 1251.69 | -4.9 |
| Vimentin                                                        | sp P31000 VIME_RAT       | E.SLPLVDTHSKRT.L                              | 40.38 | 1352.74 | -0.9 |
| Vimentin                                                        | sp P31000 VIME_RAT       | E.SLPLVDTHSKRTL.L                             | 55.52 | 1465.83 | -0.8 |
| Vimentin                                                        | sp P31000 VIME_RAT       | E.SLPLVDTHSKRTLLIKTVETR<br>DG.Q               | 44.47 | 2578.44 | -1   |
| Vimentin                                                        | sp P31000 VIME_RAT       | E.SLPLVDTHSKRTLLIKTVETR<br>DGQVINETSQ.H       | 19.06 | 3477.88 | -1.1 |

|          |                    |                                                          |       |         |      |
|----------|--------------------|----------------------------------------------------------|-------|---------|------|
| Vimentin | sp P31000 VIME_RAT | E.SLPLVDTHSKRTLLIKTVETR<br>DGQVINETSQHHDDLE              | 17.12 | 4224.18 | 6.1  |
| Vimentin | sp P31000 VIME_RAT | F.ANYIDKVRFLQKILLAE<br>EQL.K                             | 22.42 | 2887.58 | -1.8 |
| Vimentin | sp P31000 VIME_RAT | F.GSGTSSRPSSNRSYVTT.S                                    | 30.4  | 1799.84 | -1.1 |
| Vimentin | sp P31000 VIME_RAT | F.GSGTSSRPSSNRSYVTTSTR<br>T.Y                            | 28.85 | 2245.07 | 0.9  |
| Vimentin | sp P31000 VIME_RAT | F.KNTRTNEKVELQELNDR.F                                    | 33.09 | 2086.08 | -0.6 |
| Vimentin | sp P31000 VIME_RAT | F.KNTRTNEKVELQELNDRFAN<br>YIDKV(-.98).R                  | 17.03 | 3035.58 | -0.2 |
| Vimentin | sp P31000 VIME_RAT | F.KNTRTNEKVELQELNDRFAN<br>YIDKV.R                        | 17.8  | 3036.56 | -2.8 |
| Vimentin | sp P31000 VIME_RAT | F.SLADAINTEFKNTRTNEKVEL<br>QEL.N                         | 27.02 | 2762.41 | 1.1  |
| Vimentin | sp P31000 VIME_RAT | F.SLADAINTEFKNTRTNEKVEL<br>QELNDRFANYIDKV.R              | 27.26 | 4098.07 | -1.7 |
| Vimentin | sp P31000 VIME_RAT | F.SSLNLRETNLE.S                                          | 27.54 | 1274.65 | -0.7 |
| Vimentin | sp P31000 VIME_RAT | F.SSLNLRETNLESPLVDTHSK<br>.R                             | 35.79 | 2352.23 | -2.7 |
| Vimentin | sp P31000 VIME_RAT | F.SSLNLRETNLESPLVDTHSK<br>RT.L                           | 28.32 | 2609.38 | -1.9 |
| Vimentin | sp P31000 VIME_RAT | F.SSLNLRETNLESPLVDTHSK<br>RT.L.L                         | 31.15 | 2722.46 | -1.1 |
| Vimentin | sp P31000 VIME_RAT | F.SSLNLRETNLESPLVDTHSK<br>RTLLIKTVETRDGQVINETSQ<br>HDDLE | 19.61 | 5480.81 | 3.5  |
| Vimentin | sp P31000 VIME_RAT | G.GSGTSSRPSSNRSYVTT.S                                    | 18.67 | 1742.82 | -0.4 |
| Vimentin | sp P31000 VIME_RAT | G.Q(-17.03)VINETSQHHDDLE                                 | 45.75 | 1646.72 | -1.3 |
| Vimentin | sp P31000 VIME_RAT | G.QVINETSQHHDDLE                                         | 45.84 | 1663.74 | -2   |
| Vimentin | sp P31000 VIME_RAT | G.SALRPSTSR.S.L                                          | 28.03 | 1060.56 | -0.4 |
| Vimentin | sp P31000 VIME_RAT | G.SALRPSTSR.SLY.S                                        | 21.6  | 1336.71 | -0.2 |
| Vimentin | sp P31000 VIME_RAT | G.SALRPSTSR.SLYSSSPGGAYV<br>TR.S                         | 17.68 | 2399.22 | -3.8 |
| Vimentin | sp P31000 VIME_RAT | G.SALRPSTSR.SLYSSSPGGAYV<br>TR.SSAVRLR.S                 | 21    | 3168.68 | 0.3  |
| Vimentin | sp P31000 VIME_RAT | G.TSSRPSSNRSYVTT.S                                       | 26.64 | 1541.74 | -0.3 |
| Vimentin | sp P31000 VIME_RAT | H.SKRTLLIKTVETRDGQVINET<br>SQHHDDLE                      | 21.31 | 3361.72 | 0    |
| Vimentin | sp P31000 VIME_RAT | H.SKRTLLIKTVETRDGQVINET<br>SQHHDDLE(-.98)                | 22.88 | 3360.74 | -6.3 |
| Vimentin | sp P31000 VIME_RAT | I.KTVETRDGQVINETSQ.H                                     | 28.02 | 1803.9  | -0.6 |
| Vimentin | sp P31000 VIME_RAT | I.KTVETRDGQVINETSQHHDD<br>LE                             | 59.55 | 2550.19 | -1.7 |
| Vimentin | sp P31000 VIME_RAT | K.RTLLIKTVETRDGQVINETSQ<br>.H                            | 39.84 | 2400.3  | 0.2  |
| Vimentin | sp P31000 VIME_RAT | K.RTLLIKTVETRDGQVINETSQ<br>HHDDLE                        | 52.03 | 3146.6  | -2.5 |
| Vimentin | sp P31000 VIME_RAT | K.TVETRDGQVINETSQ.H                                      | 38.46 | 1675.8  | -2.4 |
| Vimentin | sp P31000 VIME_RAT | K.TVETRDGQVINETSQHHDDL<br>E                              | 61.95 | 2422.1  | -2.8 |
| Vimentin | sp P31000 VIME_RAT | L.IKTVEVTRDGQVINETSQ.H                                   | 56.46 | 1916.98 | -1.5 |
| Vimentin | sp P31000 VIME_RAT | L.IKTVEVTRDGQVINETSQHHD<br>DLE                           | 38.89 | 2663.28 | -0.8 |
| Vimentin | sp P31000 VIME_RAT | L.LIKTVETRDG.Q                                           | 28.06 | 1130.63 | -0.7 |

|          |                    |                                                                   |       |         |      |
|----------|--------------------|-------------------------------------------------------------------|-------|---------|------|
| Vimentin | sp P31000 VIME_RAT | L.LIKTVETRDGQVINETSQ.H                                            | 62.62 | 2030.06 | -3.4 |
| Vimentin | sp P31000 VIME_RAT | L.LIKTVETRDGQVINETSQHH<br>DDLE                                    | 51.08 | 2776.36 | -2.2 |
| Vimentin | sp P31000 VIME_RAT | L.NDRFANYIDKV.R                                                   | 28.7  | 1353.67 | -1.6 |
| Vimentin | sp P31000 VIME_RAT | L.NDRFANYIDKVRFLEQ.Q                                              | 25.2  | 2027.02 | -0.4 |
| Vimentin | sp P31000 VIME_RAT | L.NLRETNLESLPLVDTHSKRTL<br>.L                                     | 25.11 | 2435.31 | 2.4  |
| Vimentin | sp P31000 VIME_RAT | L.NLRETNLESLPLVDTHSKRTL<br>LIKTVETRDGQVINETSQHDD<br>LE            | 21.72 | 5193.67 | -1.4 |
| Vimentin | sp P31000 VIME_RAT | L.PLPNFSSL.N                                                      | 28.44 | 873.46  | 0.4  |
| Vimentin | sp P31000 VIME_RAT | L.PLPNFSSLNL.R                                                    | 27.41 | 1100.59 | 0.2  |
| Vimentin | sp P31000 VIME_RAT | L.PLPNFSSLNLRETNLE.S                                              | 46.18 | 1842.95 | -3.1 |
| Vimentin | sp P31000 VIME_RAT | L.PLPNFSSLNLRETNLES.L                                             | 24.32 | 1929.98 | -1.7 |
| Vimentin | sp P31000 VIME_RAT | L.PLPNFSSLNLRETNLES.L.P                                           | 55.74 | 2043.06 | 0.2  |
| Vimentin | sp P31000 VIME_RAT | L.PLPNFSSLNLRETNLESPLV<br>DTHSKRT.L                               | 16.04 | 3177.68 | 0.1  |
| Vimentin | sp P31000 VIME_RAT | L.PLVDTHSKRTL.L                                                   | 46.9  | 1265.71 | -0.8 |
| Vimentin | sp P31000 VIME_RAT | L.PLVDTHSKRTLLIKTVETRDG<br>QVINETSQHDDLE                          | 30.77 | 4024.06 | 1    |
| Vimentin | sp P31000 VIME_RAT | L.QDSVDFSLADAINTEFKNTR<br>TNEKVELQELNDRFANYIDKV.<br>R             | 16.01 | 4789.35 | -6.7 |
| Vimentin | sp P31000 VIME_RAT | L.RETNLESPLVDTHSKRTL.L                                            | 16.09 | 2208.19 | -2   |
| Vimentin | sp P31000 VIME_RAT | L.RETNLESPLVDTHSKRTLLI<br>KTVETRDGQVINETSQHDDLE                   | 23.16 | 4966.54 | -2   |
| Vimentin | sp P31000 VIME_RAT | L.RSSMPGVRLQ                                                      | 28.31 | 1114.63 | -0.5 |
| Vimentin | sp P31000 VIME_RAT | M.FGGSGTSSRPSSNRSYVTT.S                                           | 38.79 | 1946.91 | -1.6 |
| Vimentin | sp P31000 VIME_RAT | M.S(+42.01)TRSVSSSSYR.R                                           | 32.32 | 1257.6  | -1.4 |
| Vimentin | sp P31000 VIME_RAT | M.S(+42.01)TRSVSSSSYRRM(+1<br>5.99)FGGSGTSSRPSSNRSYVTT<br>STRTY.S | 16.95 | 4097.92 | -2.4 |
| Vimentin | sp P31000 VIME_RAT | M.S(+42.01)TRSVSSSSYRRM.F                                         | 26.16 | 1544.74 | 0.2  |
| Vimentin | sp P31000 VIME_RAT | M.S(+42.01)TRSVSSSSYRRMFG<br>GGTSSRPSSNRS.Y                       | 27.4  | 3009.41 | -0.9 |
| Vimentin | sp P31000 VIME_RAT | M.S(+42.01)TRSVSSSSYRRMFG<br>GGTSSRPSSNRSYVTT.S                   | 33.09 | 3473.63 | -1.5 |
| Vimentin | sp P31000 VIME_RAT | M.S(+42.01)TRSVSSSSYRRMFG<br>GGTSSRPSSNRSYVTTST.R                 | 20.86 | 3661.71 | -0.7 |
| Vimentin | sp P31000 VIME_RAT | M.S(+42.01)TRSVSSSSYRRMFG<br>GGTSSRPSSNRSYVTTSTR.T                | 19.01 | 3817.81 | -4   |
| Vimentin | sp P31000 VIME_RAT | M.S(+42.01)TRSVSSSSYRRMFG<br>GGTSSRPSSNRSYVTTSTRT(-<br>.98).Y     | 18.53 | 3917.88 | -8   |
| Vimentin | sp P31000 VIME_RAT | M.S(+42.01)TRSVSSSSYRRMFG<br>GGTSSRPSSNRSYVTTSTRT.Y               | 18.42 | 3918.86 | -2   |
| Vimentin | sp P31000 VIME_RAT | M.S(+42.01)TRSVSSSSYRRMFG<br>GGTSSRPSSNRSYVTTSTRTY(<br>-.98).S    | 15.96 | 4080.94 | 1.4  |
| Vimentin | sp P31000 VIME_RAT | M.S(+42.01)TRSVSSSSYRRMFG<br>GGTSSRPSSNRSYVTTSTRTY.<br>S          | 39.44 | 4081.93 | 0    |

|          |                    |                                                             |       |         |      |
|----------|--------------------|-------------------------------------------------------------|-------|---------|------|
| Vimentin | sp P31000 VIME_RAT | M.S(+42.01)TRSVSSSSYRRMFG<br>GGTSSRPSSNRSYVTTSTRTY<br>S.L   | 17.9  | 4168.96 | -0.3 |
| Vimentin | sp P31000 VIME_RAT | M.S(+42.01)TRSVSSSSYRRMFG<br>GGTSSRPSSNRSYVTTSTRTY<br>SLG.S | 29.11 | 4339.06 | -2.4 |
| Vimentin | sp P31000 VIME_RAT | N.TEFKNTRTNEK.V                                             | 26.52 | 1366.68 | -1.4 |
| Vimentin | sp P31000 VIME_RAT | P.GGAYVTRSSAVRLR.S                                          | 38.24 | 1491.83 | -0.8 |
| Vimentin | sp P31000 VIME_RAT | Q.QNKILLAELEQL.K                                            | 28.58 | 1410.81 | -3.8 |
| Vimentin | sp P31000 VIME_RAT | Q.VINETSQHHDDLE                                             | 46.98 | 1535.69 | -0.7 |
| Vimentin | sp P31000 VIME_RAT | R.ETNLESLPLVDTHSKRTLLIK<br>TVETRDGQVINETSQHHDDLE            | 16.5  | 4810.44 | 0.8  |
| Vimentin | sp P31000 VIME_RAT | R.RMFGGSGTSSRPSSNRSYVT<br>T.S                               | 20.96 | 2234.05 | -2.4 |
| Vimentin | sp P31000 VIME_RAT | R.SLYSSSPGGAYVTR.S                                          | 25.35 | 1443.7  | -1.9 |
| Vimentin | sp P31000 VIME_RAT | R.SSAVRLR.S                                                 | 22.64 | 787.466 | -0.3 |
| Vimentin | sp P31000 VIME_RAT | R.SSAVRLRSSMPGVRL                                           | 15.78 | 1501.81 | -0.7 |
| Vimentin | sp P31000 VIME_RAT | R.SSMPGVRL.L                                                | 30.7  | 845.443 | -0.4 |
| Vimentin | sp P31000 VIME_RAT | R.SSMPGVRL.Q                                                | 36.1  | 958.527 | -0.3 |
| Vimentin | sp P31000 VIME_RAT | R.SSMPGVRLQDSVD.F                                           | 34.44 | 1502.74 | -2   |
| Vimentin | sp P31000 VIME_RAT | R.SSMPGVRLQDSVDF.S                                          | 27.64 | 1649.81 | -0.5 |
| Vimentin | sp P31000 VIME_RAT | R.SSMPGVRLQDSVDFSL.A                                        | 27.88 | 1849.92 | -1.9 |
| Vimentin | sp P31000 VIME_RAT | R.SSMPGVRLQDSVDFSLA.D                                       | 41.4  | 1920.96 | 2.4  |
| Vimentin | sp P31000 VIME_RAT | R.SSMPGVRLQDSVDFSLAD.<br>A                                  | 33.53 | 2035.99 | -7.8 |
| Vimentin | sp P31000 VIME_RAT | R.SSMPGVRLQDSVDFSLADA<br>.I                                 | 28.64 | 2107.03 | 5    |
| Vimentin | sp P31000 VIME_RAT | R.SSMPGVRLQDSVDFSLADA<br>IN(-.98).T                         | 15.38 | 2333.17 | -7.4 |
| Vimentin | sp P31000 VIME_RAT | R.SSMPGVRLQDSVDFSLADA<br>IN.T                               | 40.63 | 2334.15 | -4.9 |
| Vimentin | sp P31000 VIME_RAT | R.SYVTTSTRTYSLG.S                                           | 22.9  | 1434.7  | -0.6 |
| Vimentin | sp P31000 VIME_RAT | R.TLLIKTVETRDGQVINETSQH<br>HDDLE                            | 51.82 | 2990.49 | -1.9 |
| Vimentin | sp P31000 VIME_RAT | S.LPLVDTHSKRTL.L                                            | 27.09 | 1378.79 | -0.4 |
| Vimentin | sp P31000 VIME_RAT | S.PGGAYVTRSSAVRLR.S                                         | 20.65 | 1588.88 | -0.5 |
| Vimentin | sp P31000 VIME_RAT | S.SAVRLR.S                                                  | 17.41 | 700.434 | -0.1 |
| Vimentin | sp P31000 VIME_RAT | S.SLNLRETNLE.S                                              | 23.73 | 1187.61 | -0.6 |
| Vimentin | sp P31000 VIME_RAT | S.SMPGVRL.L                                                 | 25.16 | 758.411 | 0    |
| Vimentin | sp P31000 VIME_RAT | S.SMPGVRL.Q                                                 | 24.2  | 871.495 | -0.4 |
| Vimentin | sp P31000 VIME_RAT | S.SMPGVRLQDSVDF.S                                           | 32.81 | 1562.78 | 2.6  |
| Vimentin | sp P31000 VIME_RAT | S.SMPGVRLQDSVDFSLA.D                                        | 16.94 | 1833.93 | -2   |
| Vimentin | sp P31000 VIME_RAT | S.SMPGVRLQDSVDFSLADAI<br>N.T                                | 37.97 | 2247.12 | 6.5  |
| Vimentin | sp P31000 VIME_RAT | S.SPGGAYVTR.S                                               | 30.58 | 906.456 | -0.2 |
| Vimentin | sp P31000 VIME_RAT | S.SPGGAYVTRSSAVR.L                                          | 28.37 | 1406.73 | 0.4  |
| Vimentin | sp P31000 VIME_RAT | S.SPGGAYVTRSSAVRLR.S                                        | 37.66 | 1675.91 | -1.7 |

|                                                                  |                      |                                                                                 |       |         |      |
|------------------------------------------------------------------|----------------------|---------------------------------------------------------------------------------|-------|---------|------|
| Vimentin                                                         | sp P31000 VIME_RAT   | S.SSPGGAYVTRSSAVR.L                                                             | 15.77 | 1493.76 | -1.7 |
| Vimentin                                                         | sp P31000 VIME_RAT   | S.SSPGGAYVTRSSAVRLR.S                                                           | 38.92 | 1762.94 | -0.8 |
| Vimentin                                                         | sp P31000 VIME_RAT   | T.AALRDVRRQQYESVA.A                                                             | 22.8  | 1604.83 | -12  |
| Vimentin                                                         | sp P31000 VIME_RAT   | T.LLIKTVETRDGQVINETSQHH<br>DDLE                                                 | 22.79 | 2889.45 | 1.4  |
| Vimentin                                                         | sp P31000 VIME_RAT   | T.RDGQVINETSQHDDLE                                                              | 21.87 | 1991.89 | -2.3 |
| Vimentin                                                         | sp P31000 VIME_RAT   | T.STRTYSLGSALRPSTSR.S                                                           | 30.59 | 1925.99 | 0.6  |
| Vimentin                                                         | sp P31000 VIME_RAT   | T.VETRDGQVINETSQ.H                                                              | 41.54 | 1574.75 | -4.4 |
| Vimentin                                                         | sp P31000 VIME_RAT   | T.VETRDGQVINETSQHDDLE                                                           | 52.48 | 2321.05 | -1.3 |
| Vimentin                                                         | sp P31000 VIME_RAT   | V.QIDVDVSKPDLTAALRDVRQ<br>Q.Y                                                   | 18.23 | 2366.26 | -0.4 |
| Vimentin                                                         | sp P31000 VIME_RAT   | V.RFLEQQNKILLAELEQL.K                                                           | 20.55 | 2084.16 | 0.8  |
| Vimentin                                                         | sp P31000 VIME_RAT   | Y.RKLEGEESRISL.P                                                                | 35.33 | 1528.86 | -0.2 |
| Vimentin                                                         | sp P31000 VIME_RAT   | Y.RRM(+15.99)FGGSGTSSRPSS<br>NRSYVTT.S                                          | 18.3  | 2406.15 | -1.1 |
| Vimentin                                                         | sp P31000 VIME_RAT   | Y.RRMFGGSGTSSRPSSNRSYV<br>TT.S                                                  | 32.11 | 2390.15 | -1.1 |
| Vimentin                                                         | sp P31000 VIME_RAT   | Y.RRMFGGSGTSSRPSSNRSYV<br>TTSTRT.Y                                              | 43.1  | 2835.38 | 0    |
| Vimentin                                                         | sp P31000 VIME_RAT   | Y.RRMFGGSGTSSRPSSNRSYV<br>TTSTRTY.S                                             | 45.15 | 2998.44 | -0.6 |
| Vimentin                                                         | sp P31000 VIME_RAT   | Y.RRMFGGSGTSSRPSSNRSYV<br>TTSTRTYSLG.S                                          | 22.49 | 3255.58 | -0.2 |
| Vimentin                                                         | sp P31000 VIME_RAT   | Y.SLGSALRPST.S                                                                  | 28.1  | 987.535 | -0.8 |
| Vimentin                                                         | sp P31000 VIME_RAT   | Y.SLGSALRPSTS.R                                                                 | 15.31 | 1074.57 | -0.6 |
| Vimentin                                                         | sp P31000 VIME_RAT   | Y.SLGSALRPSTSR.S                                                                | 23.44 | 1230.67 | -0.4 |
| Vimentin                                                         | sp P31000 VIME_RAT   | Y.SLGSALRPSTSR.S                                                                | 30.99 | 1317.7  | -0.9 |
| Vimentin                                                         | sp P31000 VIME_RAT   | Y.SLGSALRPSTSRSLY.S                                                             | 24.25 | 1593.85 | -0.6 |
| Vimentin                                                         | sp P31000 VIME_RAT   | Y.SLGSALRPSTSRSLYSSSPGG<br>AYVTRSSAVRL(-.98).R                                  | 18.24 | 3268.73 | -7.7 |
| Vimentin                                                         | sp P31000 VIME_RAT   | Y.SLGSALRPSTSRSLYSSSPGG<br>AYVTRSSAVRLR.S                                       | 15.44 | 3425.81 | -0.3 |
| Vimentin                                                         | sp P31000 VIME_RAT   | Y.SSSPGGAYVTR.S                                                                 | 20.45 | 1080.52 | -0.6 |
| Vimentin                                                         | sp P31000 VIME_RAT   | Y.SSSPGGAYVTRSSAVR.L                                                            | 33.65 | 1580.79 | -1.3 |
| Vimentin                                                         | sp P31000 VIME_RAT   | Y.SSSPGGAYVTRSSAVRLR.S                                                          | 17.64 | 1849.98 | -0.4 |
| Voltage-dependent T-<br>type calcium channel<br>subunit alpha-1G | tr F1M9P2 F1M9P2_RAT | L.E(-<br>18.01)GWVDIMYFVMDAHS(+7<br>9.97)FYNFIYFILLIIVGSFFMINL<br>CLVVI(-.98).A | 20.84 | 4955.44 | 5.7  |
| Zero beta-globin                                                 | tr Q63011 Q63011_RAT | A.QAAFQKVVAGVASALAHKY<br>H                                                      | 40.35 | 2095.13 | -1.5 |
| Zero beta-globin                                                 | tr Q63011 Q63011_RAT | E.FTPSAQAAFQKVVAGVASAL<br>AHKYH                                                 | 44.75 | 2598.37 | -1.9 |
| Zero beta-globin                                                 | tr Q63011 Q63011_RAT | F.QKVVAGVASAL.A                                                                 | 28.89 | 1041.62 | -0.4 |
| Zero beta-globin                                                 | tr Q63011 Q63011_RAT | F.QKVVAGVASALAHK.Y                                                              | 33.66 | 1377.81 | -0.3 |
| Zero beta-globin                                                 | tr Q63011 Q63011_RAT | F.RLLGNMIV.I                                                                    | 21.92 | 914.537 | -0.8 |
| Zero beta-globin                                                 | tr Q63011 Q63011_RAT | F.RLLGNMIVI.M                                                                   | 22.25 | 1027.62 | -0.7 |
| Zero beta-globin                                                 | tr Q63011 Q63011_RAT | F.TPSAQAAFQKVVAGVASAL<br>AHKYH                                                  | 59.74 | 2451.3  | -1.5 |



|                  |                      |                                        |       |         |      |
|------------------|----------------------|----------------------------------------|-------|---------|------|
| Zero beta-globin | tr Q63011 Q63011_RAT | G.HHLGKEFTPSAQAAFQKVV<br>AG(-.98).V    | 20.2  | 2221.18 | 12.1 |
| Zero beta-globin | tr Q63011 Q63011_RAT | G.HHLGKEFTPSAQAAFQKVV<br>AGVASALAHKYH  | 25.86 | 3299.73 | 1.2  |
| Zero beta-globin | tr Q63011 Q63011_RAT | G.KEFTPSAQAAFQKVVAGVA<br>SALAHKYH      | 33.04 | 2855.51 | -1   |
| Zero beta-globin | tr Q63011 Q63011_RAT | H.HLGKEFTPSAQAAFQKVVA<br>GVASALAHKYH   | 39.05 | 3162.67 | 0    |
| Zero beta-globin | tr Q63011 Q63011_RAT | K.EFTPSAQAAFQKVVAGVAS<br>ALAHKYH       | 34.78 | 2727.41 | -0.8 |
| Zero beta-globin | tr Q63011 Q63011_RAT | L.ASLIVYPWTQRYFSKF.G                   | 15.14 | 2118.13 | -1.1 |
| Zero beta-globin | tr Q63011 Q63011_RAT | L.GKEFTPSAQAAFQKVVAGV<br>ASAL.A        | 27.56 | 2276.22 | 2.8  |
| Zero beta-globin | tr Q63011 Q63011_RAT | L.GKEFTPSAQAAFQKVVAGV<br>ASALAHKY.H    | 33.76 | 2775.47 | -1.1 |
| Zero beta-globin | tr Q63011 Q63011_RAT | L.GKEFTPSAQAAFQKVVAGV<br>ASALAHKYH     | 51.5  | 2912.53 | -1.2 |
| Zero beta-globin | tr Q63011 Q63011_RAT | L.HVDPENFRLLGNMIVI.M                   | 25.54 | 1865.98 | -3.2 |
| Zero beta-globin | tr Q63011 Q63011_RAT | L.HVDPENFRLLGNMIVIMMGH<br>HL.G         | 21.08 | 2572.29 | -5.2 |
| Zero beta-globin | tr Q63011 Q63011_RAT | M.GHHLGKEFTPSAQAAFQKV<br>VAGVASALAHKYH | 25.19 | 3356.75 | -1   |
| Zero beta-globin | tr Q63011 Q63011_RAT | Q.KVVAGVASALAHK.Y                      | 33.38 | 1249.75 | 0.1  |
| Zero beta-globin | tr Q63011 Q63011_RAT | S.AQAAFQKVVAGVASALAHK<br>.Y            | 38.2  | 1866.05 | -1.9 |
| Zero beta-globin | tr Q63011 Q63011_RAT | S.AQAAFQKVVAGVASALAHK<br>YH            | 49.86 | 2166.17 | -0.2 |
| Zero beta-globin | tr Q63011 Q63011_RAT | V.VAGVASALAHKYH                        | 15.45 | 1322.71 | -0.4 |
| Zero beta-globin | tr Q63011 Q63011_RAT | VHLTDAE.K                              | 22.62 | 783.376 | -0.2 |
| Zero beta-globin | tr Q63011 Q63011_RAT | VHLTDAEK.A                             | 25.96 | 911.471 | -0.8 |
| Zero beta-globin | tr Q63011 Q63011_RAT | VHLTDAEKA.T                            | 32.22 | 982.508 | 0    |
| Zero beta-globin | tr Q63011 Q63011_RAT | VHLTDAEKATV.N                          | 34.24 | 1182.62 | 0    |
| Zero beta-globin | tr Q63011 Q63011_RAT | VHLTDAEKATVNLWGKVN<br>PVEIGAES.L       | 20.36 | 2833.46 | 1.7  |
| Zero beta-globin | tr Q63011 Q63011_RAT | VHLTDAEKATVNLWGKVN<br>PVEIGAESL.A      | 39.83 | 2946.54 | 0.3  |

**Table S2.** Peptides exclusively identified from tissue Extracts using ProSight.

| Precursor                                                 | Accession number | Peptide sequence                                    | p score  | Mass (Da) | Mass error (ppm) |
|-----------------------------------------------------------|------------------|-----------------------------------------------------|----------|-----------|------------------|
| Zinc finger protein with KRAB and SCAN domains 1          | F8WFK5           | KEFGEKREQQGRVIERQQKNPEEK                            | 4.96E-12 | 2969.56   | 5.1              |
| Zero beta-1 globin                                        | Q62669           | IVIMMGHHLGKEFTPSAQAAFQKVVAGV<br>ASALAHKYH           | 4E-44    | 3944.07   | -0.52            |
| Voltage-dependent L-type calcium channel subunit alpha-1D | E9PU62           | FERPRGYHHPQGF                                       | 5.35E-08 | 1626.79   | 5.62             |
| Vimentin                                                  | P31000           | SSMPGVRLQDSVDFSLADAINTEFKNTR<br>TNEKVELQEL          | 2.32E-23 | 4394.22   | 1.6              |
| Vimentin                                                  | G3V8C3           | SSSSYRRMFGGSGTSSRPSSNRSYVTTSTR<br>TY                | 2.11E-07 | 3509.63   | 0.49             |
| Vimentin                                                  | G3V8C3           | RRMFGGSGTSSRPSSNRSYVTTSTRTYS                        | 4.82E-11 | 3085.47   | -0.86            |
| Vimentin                                                  | G3V8C3           | RQDVDNASLARLDLERKVESLQEEIA                          | 3.02E-18 | 2996.55   | 0.48             |
| Vimentin                                                  | G3V8C3           | SVAAKNLQEAEEWYKSKFADLS                              | 4.21E-12 | 2513.24   | -1.74            |
| Vimentin                                                  | G3V8C3           | ANYIDKVRFLEQQNKILLA                                 | 9.29E-13 | 2275.27   | -1.65            |
| Vimentin                                                  | G3V8C3           | MFGGSGTSSRPSSNRSYVTTST                              | 3.65E-10 | 2266.03   | -1.31            |
| Vimentin                                                  | G3V8C3           | MFGGSGTSSRPSSNRSYVTT                                | 7.36E-20 | 2077.95   | -2.05            |
| Vimentin                                                  | G3V8C3           | RKLEGEESRISLPLPN                                    | 5.38E-14 | 1950.09   | 0.07             |
| Vimentin                                                  | G3V8C3           | SLARLDLERKVESL                                      | 1.91E-15 | 1627.93   | 0.08             |
| Uncharacterized protein                                   | D3ZCY4           | MARTRRTARKPSGGKAPRKQLATKAALK<br>SAPSTGRVKKLHPYRPGTV | 4.44E-08 | 5080.96   | 3.45             |
| Uncharacterized protein                                   | F1LY12           | NYRRRRPENPKPQDGKETKAADPPAENSS<br>APEAEQGGAE         | 2.23E-38 | 4247.03   | -0.56            |
| Uncharacterized protein                                   | F1LY12           | RRRRPENPKPQDGKETKAADPPAENSSAP<br>EAEQGGAE           | 7.45E-49 | 3969.93   | 0.56             |
| Uncharacterized protein                                   | F1LTW2           | LRSCSGLPSLSSQPGPVLSSVSSPPYPISAM<br>RSTP             | 1.27E-12 | 3541.79   | 8                |
| Uncharacterized protein                                   | F1M4U4           | AGKQLEDGRTLSDYNIQKESTLHLVLR LR<br>GG                | 2.59E-18 | 3466.85   | -2.21            |
| Uncharacterized protein                                   | F1LRB0           | QTSEPCHSPRVMIAHAKKVNMTSLTVLGLR<br>L                 | 1.89E-14 | 3345.77   | -4.47            |
| Uncharacterized protein                                   | F1LYR1           | SYMVKGRRLCQPKQKVQTEAEVEAPPAP                        | 3.32E-08 | 3139.62   | -2.76            |
| Uncharacterized protein                                   | F1LU72           | TATQKLKLAHEYRPETAGEEAKAAGHGD                        | 6.46E-06 | 2978.46   | -6.3             |
| Uncharacterized protein                                   | F1LP73           | KVLKQVHPDTGISSKAMGIMNSFV                            | 6.63E-09 | 2586.37   | -1.03            |
| Uncharacterized protein                                   | F1LZV7           | FVKLISWYDNEYGYSNRVVDL                               | 1.72E-10 | 2579.27   | -1.3             |
| Uncharacterized Protein                                   | D3ZFK7           | AIKFPLTTESAMKKIEDNNTLV                              | 1.85E-06 | 2575.39   | -1.77            |
| Uncharacterized protein                                   | D3ZL16           | EVFSILASSAGLLGCIFFQKCY                              | 7.47E-12 | 2395.19   | -5.29            |
| Uncharacterized Protein                                   | D3ZFK7           | AIKFPLTTESAMKKIEDNNT                                | 1.15E-10 | 2363.24   | 1.92             |
| Uncharacterized protein                                   | F1M4U4           | SDYNIQKESTLHLVLR LRGG                               | 3.29E-18 | 2298.24   | 0.41             |
| Uncharacterized protein                                   | F1LP73           | YKVLKQVHPDTGISSKAMG                                 | 1.62E-12 | 2058.09   | 0.6              |
| Uncharacterized protein                                   | D4A160           | EKKA AKLKEKYEKDIAA                                  | 7.99E-16 | 1962.12   | -0.29            |
| Uncharacterized protein                                   | F1LUF0           | MKLACTDTHISSAYGLFV                                  | 7.08E-09 | 1955.95   | -1.46            |
| Uncharacterized protein                                   | F1M4U4           | NIQKESTLHLVLR LRGG                                  | 1.32E-24 | 1933.12   | -0.55            |

|                                                          |        |                                                                                    |          |         |       |
|----------------------------------------------------------|--------|------------------------------------------------------------------------------------|----------|---------|-------|
| Uncharacterized protein                                  | F1M6B2 | SEYRPKIKGEHPGLS                                                                    | 2.92E-12 | 1696.89 | -0.69 |
| Uncharacterized protein                                  | D4A1X0 | GFGFVTFSSMAEVDVA                                                                   | 5.75E-12 | 1662.77 | 3.51  |
| Uncharacterized protein                                  | D4A2A0 | EKERKKGEGKEGER                                                                     | 4.75E-09 | 1658.86 | -5.22 |
| Uncharacterized protein                                  | F1LUK3 | EADIAAGKFIEHGEF                                                                    | 3.87E-11 | 1632.79 | 3.94  |
| Uncharacterized protein                                  | F1LXY2 | EYTDGGILDPPDVLVA                                                                   | 2.09E-06 | 1591.73 | 1.59  |
| Uncharacterized protein                                  | F1M2X2 | GHLPKVQMPSLK                                                                       | 4.2E-28  | 1333.75 | -0.8  |
| Uncharacterized protein                                  | E9PTR0 | KSGVEVRLPNDL                                                                       | 2.71E-10 | 1325.73 | 5.08  |
| Uncharacterized protein                                  | F1LU95 | GKAFRFPGLSPL                                                                       | 1.13E-09 | 1288.73 | 0.26  |
| Uncharacterized protein                                  | F1LX34 | VHIYMCIFVL                                                                         | 1.45E-11 | 1236.64 | 3.91  |
| Uncharacterized protein                                  | F1LT80 | EFQSPLNENL                                                                         | 4.05E-11 | 1075.52 | 2.73  |
| Uncharacterized protein                                  | F1M3N2 | GARKASNIVL                                                                         | 2.01E-08 | 1027.62 | 6.46  |
| Uncharacterized protein                                  | F1LZV9 | FEDKHGSN                                                                           | 2.32E-10 | 932.399 | 5.08  |
| Ubiquitin-60S ribosomal protein L40                      | P62986 | MQIFVKTLTGKITLEVEPSDTIENVKAKI<br>QDKEGIPPDQQLRFAGKQLEDGRTLSDY<br>NIQKESTLHLVLRIRGG | 9.16E-25 | 8559.6  | -2.47 |
| Tubulin polymerization-promoting protein family member 3 | Q5PPN5 | IAGKEPANIGVTKAKTGGAVDRLTDTSK<br>VFGQSGAGNNWAKGHYTEGAELVDSVL<br>DVVRKEAESCD         | 2.62E-19 | 2797.53 | -1.6  |
| Tubulin beta-5 chain                                     | P69897 | VFGQSGAGNNWAKGHYTEGAELVDSVL<br>DVVRKE                                              | 1.04E-07 | 4036.89 | -0.07 |
| Tubulin beta-5 chain                                     | P69897 | VFGQSGAGNNWAKGHYTEGAELVDSVL<br>DVVRKE                                              | 5.41E-17 | 3531.74 | -0.16 |
| Tubulin beta-5 chain                                     | P69897 | NEATGGKYVPRAILVDLEPGTMDSVR                                                         | 1.13E-25 | 2787.41 | -1.92 |
| Tubulin beta-5 chain                                     | P69897 | YTEGAELVDSVLVDVVRKEAESCD                                                           | 3.7E-16  | 2526.18 | -0.38 |
| Tubulin beta-5 chain                                     | P69897 | IREEYPDRIMNTF                                                                      | 3.66E-12 | 1682.81 | -1.23 |
| Tubulin beta-2A chain                                    | P85108 | AAGNKYVPRAILVDLEPGTMDSVR                                                           | 9.12E-10 | 2571.35 | 0.17  |
| Tubulin alpha-4A chain                                   | Q5XIF6 | GGGTGSGFTSLLMERL                                                                   | 3.77E-21 | 1581.78 | -0.74 |
| Tubulin alpha-3 chain                                    | Q68FR8 | IERTPTYNLNRIGQIVS                                                                  | 4.15E-10 | 2086.15 | -0.94 |
| Tubulin alpha-1C chain                                   | Q6AYZ1 | FSETGAGKHPRAVF                                                                     | 5.3E-34  | 1601.83 | -2.23 |
| Troponin T, fast skeletal muscle                         | F1LPQ5 | AERRKPLNIDHLSDDKLRDKAKELWDT                                                        | 5.98E-22 | 3261.72 | -2.32 |
| Triosephosphate isomerase                                | P48500 | ASQPDVDGFLVGGASLKPEFVDIINAKQ                                                       | 1.03E-06 | 2914.51 | -0.71 |
| Triosephosphate isomerase                                | P48500 | APSRKFFVGGNWKMNRRKK                                                                | 4.67E-24 | 2207.19 | -0.66 |
| Transmembrane emp24 domain-containing protein 9          | Q5I0E7 | ATPGLGMFVEVKDPEDKVILARQYGSEGR<br>FTFTSHTPGEHQICLHSNSTK                             | 1.03E-08 | 5514.72 | 2.33  |
| Transitional endoplasmic reticulum ATPase                | P46462 | QANFISIKGPELLTM                                                                    | 6.7E-16  | 1660.89 | -1.18 |
| Kynurenine--oxoglutarate transaminase 1, mitochondrial   | Q08415 | VHLMWPLW                                                                           | 1.22E-11 | 1080.56 | -2.1  |
| 3-hydroxyisobutyrate dehydrogenase, mitochondrial        | P29266 | ASLGFRGAASGLRYWSGRRRPVG                                                            | 4.09E-07 | 2476.34 | 4.9   |
| Transgelin                                               | P31232 | MGSNRGASQAGMTGYGRPRQIIS                                                            | 9.41E-19 | 2394.16 | -0.53 |
| Transgelin                                               | P31232 | GSNRGASQAGMTGYGRPRQIIS                                                             | 3.47E-26 | 2263.12 | -0.51 |
| Transferrin receptor protein 1                           | G3V679 | SEKLNSIE                                                                           | 9.52E-15 | 918.466 | -0.18 |
| Thioredoxin                                              | P11232 | AAAGDKLVVVDF                                                                       | 7.36E-10 | 1203.65 | 0.78  |

|                                                            |        |                                                                      |          |         |         |
|------------------------------------------------------------|--------|----------------------------------------------------------------------|----------|---------|---------|
| Succinyl-CoA ligase subunit alpha, mitochondrial           | P13086 | DVFLKDPATEGIVL                                                       | 2.26E-31 | 1515.82 | -0.5    |
| Stress-70 protein, mitochondrial                           | F1M953 | IGIPPAPRGVVPQIEVTF                                                   | 8E-18    | 1790.01 | -0.82   |
| Serine/arginine-rich splicing factor 2                     | Q6PDU1 | HDKRDAEDAMDAMDGAVLDGRELRV                                            | 2.66E-21 | 2784.29 | -0.42   |
| Scg2 protein                                               | Q6P7R4 | VPSPGSSSEDDLQEEEQLEQAIKEHLGQGSS<br>QEMEKLAKVS                        | 8.05E-26 | 4366.08 | 0.33    |
| Sarcolemmal membrane-associated protein                    | D3ZQC9 | KTLKECSSLGIQVDDFLPKINGSTEKEKLM<br>V                                  | 5.41E-11 | 3465.81 | 4615.06 |
| Reticulon-4                                                | D4AEM9 | FALPAASEPVPSSAEKIMDL                                                 | 2.17E-18 | 2201.12 | 7264.94 |
| Ras-related protein R-Ras                                  | D3Z8L7 | EDSYTKICTVDGIPARLDILDTAGQEEFGA<br>MREQYMRAGNGFLLVFAINDRQSFIEVSK<br>L | 1.08E-05 | 6740.4  | 9.22    |
| RanBP-type and C3HC4-type zinc finger-containing protein 1 | D3ZGV7 | LDLGVSIAENRSTLSYHCKTPDCRGW                                           | 5.6E-13  | 2920.42 | 5.35    |
| Putative L-aspartate dehydrogenase                         | G3V9Z4 | ELVFVWNRDPGRMAGSVPPALQLEDL                                           | 1.18E-15 | 2908.49 | -3.87   |
| Protein Zfp64                                              | D3ZA54 | FSRKDKLKTHTMRCHTGVPYKCKTCDYA<br>AADSSSLNKHLRIHS                      | 3.19E-08 | 4960.49 | -1.5    |
| Protein Zfp398                                             | D3ZGH2 | TFTHPSRLTYHLRVHNSTERPF                                               | 2.93E-07 | 2695.37 | -4.92   |
| Protein Wwc1                                               | F1M6U0 | VDAVSALLEQTAVEL                                                      | 6.59E-09 | 1556.83 | -0.81   |
| Protein Wdr33                                              | D3Z8Y4 | QPIKFWDPKTGQSLA                                                      | 6.76E-08 | 1714.9  | 1.94    |
| Protein Ubqln2                                             | D4AA63 | GSPQPNNPEVRFQQLEQLNAMGFLNRE<br>ANLQALIATGGDINAAIERLLGSQPS            | 4.87E-27 | 5895.01 | 0.29    |
| Protein Tmem80                                             | Q5XID3 | ATLLMIVYKSTQGNLTEAEVPLAASLAFT<br>A                                   | 7.24E-09 | 3122.66 | -4.89   |
| Protein Tmem80                                             | Q5XID3 | ATLLMIVYKSTQGNLTEAEVPLAASLAFT                                        | 1.17E-09 | 3051.62 | -5.17   |
| Protein Tbx19                                              | D3Z977 | FKEVTNEMIVTKNGRRMFPVLKISVTG                                          | 4.37E-08 | 3093.66 | -7.46   |
| Protein Tacc1                                              | D3ZNW7 | LTMEKEQALADLN                                                        | 7.02E-12 | 1474.73 | -0.04   |
| Protein Stag1                                              | D4A3Q2 | LQCSHYSILWQLVKITD                                                    | 3.22E-10 | 2046.05 | -4.23   |
| Protein Srrd                                               | F1LTK4 | CSSALETITECLRKQLEQLQSLTEALGRL                                        | 2E-19    | 3232.68 | 0.54    |
| Protein Spint2                                             | Q6P796 | LASLLLSGAQAASRDLDVHENTIDGLARS                                        | 3.34E-08 | 2992.56 | -4.6    |
| Protein Spg20                                              | E9PT90 | ESPQRESQGGATSTEGTRDVERKM                                             | 1.39E-09 | 2635.23 | 10.45   |
| Protein Spag61                                             | D3ZD28 | QQTAAALGRLANYNDDLAEAWEMGVV<br>GRHTPEHARAVAITNTLP                     | 2.69E-12 | 4840.45 | 3.19    |
| Protein Slc43a2                                            | D3ZSK2 | WMACTAVLENL                                                          | 2.33E-10 | 1249.58 | 1.71    |
| Protein Sf3b2                                              | D3ZJX7 | PMAHPPNLGPPPLRVGEPVALSEEERLKL<br>AQQQA                               | 9.69E-19 | 3766    | -0.57   |
| Protein Serpinb11                                          | D3ZJI7 | LSSSNVGENI                                                           | 1.07E-21 | 1018.5  | 6.51    |
| Protein Sema6d                                             | D3ZDA2 | NTVDYHYSRQYPVFR                                                      | 4.81E-13 | 1943.93 | 0.38    |
| Protein RGD1565025                                         | D4A806 | IGLGDLL                                                              | 1.79E-14 | 699.417 | -0.66   |
| Protein RGD1564745                                         | F1M523 | HDDPEIHKQA                                                           | 1.6E-11  | 1164.58 | 5.87    |
| Protein RGD1564626                                         | F1LTP3 | QAGASKLLRDARSLPVERLSH                                                | 1.28E-09 | 2303.28 | 10.26   |
| Protein RGD1563996                                         | F1M6R6 | ERSHTAVYAVCGVAALLVLVGIGA                                             | 4.72E-08 | 2368.32 | 12.01   |
| Protein RGD1562404                                         | D3ZII2 | LNTNIDGRWKI                                                          | 5.37E-07 | 1328.71 | -6.6    |
| Protein RGD1561826                                         | D3ZEM3 | LNAKSKMQDLPVPI                                                       | 9.33E-08 | 1552.86 | -0.11   |

|                           |        |                                                                |          |         |       |
|---------------------------|--------|----------------------------------------------------------------|----------|---------|-------|
| Protein RGD1559921        | F1LTZ6 | LTQQLAQGTGKPARFI                                               | 4.86E-07 | 1727.99 | 9.97  |
| Protein RGD1310945        | F1M6P5 | FLIAKREMKN                                                     | 2.35E-12 | 1248.71 | 9.48  |
| Protein RGD1308134        | D3ZY53 | VSDSSPAGAQIKTTVKRKVYEDSGIPLPA                                  | 1.23E-08 | 3013.63 | 7.31  |
| Protein Rfesd             | D3ZF58 | KYKITLATGEGLYQSIDPKDPSAKPKWCS<br>K                             | 1.01E-11 | 3351.76 | 2.79  |
| Protein Prmt6             | D4A307 | EAGVGGRFRCSCYGSAPLH                                            | 8.33E-08 | 1965.89 | 7.29  |
| Protein Olr633            | D3ZMD0 | SVEGRRKALSTCTSHFIV                                             | 1.91E-11 | 1990.04 | -2.09 |
| Protein Olr463            | D4A338 | EVTEFILLGLSDNPDLCILFALFLVIYMVT<br>LVGNLGMALIKIDRSLHTPMYFFLSLS  | 2.24E-07 | 6764.59 | 6.44  |
| Protein Olr144            | D3ZLN8 | SWTESGILLAMSFDRYVAICN                                          | 1.2E-10  | 2375.13 | -0.24 |
| Protein Olr1347           | G3V9E6 | LACADTTLNEL                                                    | 2.4E-14  | 1162.55 | -0.49 |
| Protein Olr1149           | D3ZYP6 | YISSCIFAGIPLS                                                  | 3E-13    | 1369.7  | -5.52 |
| Protein Olr1096           | D4ACL1 | ILVSLFSRSGSPELLFSLVAAMFIIGLLGNTI<br>LLLLLIQIDSKLHTPMYFLLSQLSLL | 4.25E-08 | 6271.61 | 4.34  |
| Protein Msl1              | F1LTE3 | IQESEPEVTSFFPEPDDVESLMITPFLPVVA<br>FGRPLPKLTPQN                | 3.23E-10 | 4810.44 | -1.2  |
| Protein Mobk12b           | D3ZCN1 | FVTEMNLIDRKELEPLKEMTTR                                         | 1.01E-08 | 2692.38 | -3.96 |
| Protein Mapkapk2          | F1M244 | KSIGEAIQYLHSINI                                                | 1.44E-08 | 1684.91 | -2    |
| Protein Mapk1ip11         | D3ZNX9 | NPYQVPSGPAGAPPMPGGPHSYH                                        | 2.05E-14 | 2314.06 | 0.19  |
| Protein LOC680353         | D3ZZH2 | TLVITDKEKAELKQSLPPGLAVKELK                                     | 2.63E-10 | 2975.76 | -1.03 |
| Protein LOC679739         | D3ZCZ9 | GVRVSRSGEKITHTGQVYDEKDYRRIR                                    | 5.12E-17 | 3204.69 | 0.64  |
| Protein LOC500164         | D3ZGH3 | SPKRLIYLVSKLDSGIPDRFS                                          | 4.02E-09 | 2390.31 | -7.06 |
| Protein LOC100364909      | D3ZFA8 | GRVRTKTVKKAARVIIKEY                                            | 4.01E-16 | 2215.36 | 0.24  |
| Protein LOC100364909      | D3ZFA8 | LDFGSLSNL                                                      | 1.83E-09 | 964.487 | -1.1  |
| Protein LOC100362909      | D4A8V1 | LPAAKPGIPP                                                     | 2.38E-08 | 959.591 | 7.23  |
| Protein LOC100362458      | D3ZP95 | LPLDTTTPGPSLEQL                                                | 2.87E-12 | 1580.83 | 0.72  |
| Protein Ints4             | D4A649 | ENQATQVRLVDVACKHLTDTSHGVR                                      | 3.75E-07 | 2776.4  | 0.26  |
| Protein Fhdc1             | D4ACI6 | SSRGAGPWKRPELTSRATPRETPSSTDTQL<br>SRRSS                        | 1.74E-11 | 3841.95 | -1.29 |
| Protein Fbxw17            | D3Z9G1 | WNKENTSPILK                                                    | 9.47E-09 | 1328.71 | 2.28  |
| Protein Dzip3             | D3ZY61 | ALTAEVYFLQRRDFGLLHLEQTEKECLN<br>QLARVTHMAASNLE                 | 1.05E-10 | 4960.49 | 1.6   |
| Protein Dntt              | E9PT58 | KDIEGIPCLGD                                                    | 1.89E-12 | 1158.57 | 5.73  |
| Protein Dmrt2             | D4A0L2 | ESFSGSPLARASKEAGGSCPGSAG                                       | 1.76E-12 | 2209.01 | 1.83  |
| Protein Birc6             | F1LY70 | MGRQGLATCQLSEPLWFILRVLDTSDA<br>LKAHFDMGGVQLICNN                | 8.47E-10 | 4960.49 | 0.09  |
| Protein Arhgef5           | E9PT59 | DQQEAVTQSLQD                                                   | 5.85E-10 | 1360.65 | 28.98 |
| Protein Ank2              | F1LZM2 | EDGFTPLAVALQQGHNQAVAILLEND                                     | 3.82E-13 | 2762.39 | -7.88 |
| Protein AF1q              | Q5M971 | PIPELDLSELEGLGL                                                | 1.14E-23 | 1593.85 | 0.52  |
| Protein AF1q              | Q5M971 | PIASIRSIDLDLL                                                  | 6.1E-10  | 1424.82 | -0.54 |
| Procollagen isoform CRA_a | D4A111 | VIVVLTGDQSEEDGFALPSAELKSADVNV<br>FAVGVEDADERTLREIAS            | 9.33E-13 | 4960.48 | -0.84 |
| Prefoldin subunit 2       | B0BN18 | SAEQVIAGFNRLRQEQRGLASKAAELEME<br>LNEHSLVIDTLKEVDETRKCYRMVGGVL  | 3.96E-07 | 6429.32 | 2.35  |
| Thymosin beta-4           | P62329 | PSKETIEQEKQAGES                                                | 1.4E-07  | 1659.83 | 20.2  |

|                                                         |        |                                                               |          |         |         |
|---------------------------------------------------------|--------|---------------------------------------------------------------|----------|---------|---------|
| Phosphatidylethanolamine-binding protein 1              | P31044 | KGNDISSGTVLSEYVVGSGPPKDTGLHRYV<br>WLVY                        | 4.39E-07 | 3593.82 | 0.4     |
| Polymerase I and transcript release factor              | P85125 | KENLEKTRHTLEKR                                                | 3.61E-10 | 1780.99 | -0.26   |
| Polymerase (RNA) II polypeptide D                       | D4A259 | LNSEVHMLL                                                     | 1.96E-09 | 1054.55 | -0.54   |
| Pleckstrin homology domain-containing family A member 8 | D3ZY60 | NTSFSDIELLEDGIPTEAFLA                                         | 1.68E-10 | 2368.15 | 9.94    |
| Phosphatidylethanolamine-binding protein 1              | P31044 | AGPLSLQEVDPEPPQHALRV                                          | 7.88E-12 | 2055.08 | 0.07    |
| Peripherin                                              | P21807 | TTVPEVEPPQDHSRKMVLIRTIETRDGEK<br>VVTESQKEQHSELDKSSIHSY        | 3.27E-12 | 5859.93 | -0.76   |
| Peripherin                                              | P21807 | IRTIETRDGEKVVVTESQKEQHSELDKSSIHS<br>Y                         | 6.02E-33 | 3728.86 | -0.18   |
| Peripherin                                              | P21807 | RTIETRDGEKVVVTESQKEQHSELDKSSIHS<br>Y                          | 8.3E-15  | 3615.78 | -0.68   |
| Peripherin                                              | P21807 | IRTIETRDGEKVVVTESQKEQHSELDKSSIHS                              | 5.83E-14 | 3565.8  | -0.02   |
| Peripherin                                              | P21807 | RTIETRDGEKVVVTESQKEQHSELDKSSIHS                               | 4.38E-24 | 3452.71 | 0.07    |
| Peripherin                                              | P21807 | RTIETRDGEKVVVTESQKEQH                                         | 1.21E-24 | 2369.19 | -1.46   |
| Periaxin                                                | D3ZWG4 | AIAGQLKIPEVELVTPGAQETEKVTSGVKP<br>SGLQVSTTRQVVAEGQEGAQRVSSLG  | 9.76E-24 | 5714.05 | -0.48   |
| Periaxin                                                | D3ZWG4 | ISLPQVELASFGGAEPEIAAPSAGTVGSRI<br>QVPQVM                      | 2.87E-22 | 3734.92 | 0.3     |
| Periaxin                                                | D3ZWG4 | PKVPDIKLPKIPKVPPEMAVPDVPLPELQ<br>L                            | 1.82E-10 | 3441.99 | 0.39    |
| Periaxin                                                | Q63425 | TFGLSLLESRPSGPEVAAESKLLPLTK                                   | 1.28E-11 | 2967.66 | -0.36   |
| Periaxin                                                | D3ZWG4 | ASFGEAGPEIAAPSAGTVGSRIQVPQVM                                  | 2.9E-26  | 2855.41 | -1.6    |
| Periaxin                                                | D3ZWG4 | DTQEGAAVVKVPTLDVAAPSVEVD                                      | 1.78E-69 | 2409.22 | -2.19   |
| Periaxin                                                | D3ZWG4 | EVKLPKIPDMAVPDVRLPEL                                          | 5.96E-10 | 2258.27 | -0.78   |
| Periaxin                                                | D3ZWG4 | DTQEGAAVVKVPTLDVAAPSVE                                        | 4.91E-20 | 2195.13 | -1.35   |
| Periaxin                                                | D3ZWG4 | LGAPAAPAVEPPTTGIQVPQVE                                        | 5.44E-47 | 2141.13 | -3.25   |
| Periaxin                                                | D3ZWG4 | KLPKIPDMAVPDVRL                                               | 1.68E-16 | 1690.98 | 0.26    |
| Periaxin                                                | D3ZWG4 | LELPGTQVAGGDL                                                 | 6.48E-26 | 1381.75 | -1.28   |
| Peptidyl-prolyl cis-trans isomerase A                   | P10111 | KTEWLDGKHVVFVKVKEGMSIVEAMERF<br>GSRNGKTSKKITISDCGQL           | 5.25E-08 | 5223.7  | -0.09   |
| Acyl-CoA-binding protein                                | P11030 | SHFKQATVGDVNTDRPGLLDL                                         | 9.49E-15 | 2282.17 | -1.52   |
| Osteogenic growth peptide                               | P62804 | KRQGRTYLGFGG                                                  | 5.61E-10 | 1338.72 | -0.65   |
| Osteogenic growth peptide                               | P62804 | QGRTYLGFGG                                                    | 8.44E-12 | 1054.52 | 0.03    |
| Pro-neuropeptide Y                                      | P07808 | YPSKPDNPGEDAPAEDMARYYSALRHYN<br>LITRQRY                       | 6.62E-17 | 4269.09 | -230.39 |
| Fibrinogen beta chain                                   | P14480 | TTDSKVDLSIAR                                                  | 3.82E-18 | 1419.72 | -2.16   |
| Pro-neuropeptide Y                                      | P07808 | SSPETLISDLLMRESTENAPRTRLEDPSMW                                | 9.11E-18 | 3460.66 | -0.63   |
| Osteoglycin (Predicted)                                 | D3ZVB7 | SLLEELTLAENQLLRPLVLPKLT                                       | 1.51E-08 | 2699.58 | -0.39   |
| Nuclear receptor corepressor 1                          | D3ZN55 | TAADALAALVDAASA                                               | 4.64E-15 | 1400.71 | 0.17    |
| Non-muscle caldesmon                                    | Q62736 | TNAIEGTKASKPMKPAASDLPVPAEGVRN<br>IKSMWEKGSV                   | 8.54E-08 | 4094.13 | 0.08    |
| Neurofilament light polypeptide                         | P19527 | SGYSQSSQVFGRSAYSGLQSSYLMSARA<br>FPAYYTSHVQEEQSEVEETIEATKAEEAK | 1.99E-29 | 6385.95 | 0.07    |
| Neurofilament light polypeptide                         | P19527 | SAPVSSSLSVRRSYSSSSGLMPSLENLDS<br>QVAAISNDLK                   | 3.6E-12  | 4239.13 | -0.09   |

|                                                              |        |                                                                                       |          |         |        |
|--------------------------------------------------------------|--------|---------------------------------------------------------------------------------------|----------|---------|--------|
| Neurofilament light polypeptide                              | P19527 | SAAKNTDAVRAAKDEVSESRLLK                                                               | 1.36E-21 | 2614.41 | -0.18  |
| Neurofilament light polypeptide                              | P19527 | EEQSEVEETIEATKAEEAK                                                                   | 4.62E-12 | 2148.99 | -0.08  |
| Neurofilament light polypeptide                              | P19527 | LDLSQVAAISNDLK                                                                        | 2.18E-17 | 1485.8  | 0.36   |
| Neurofilament light polypeptide                              | P19527 | EETIEATKAEEAK                                                                         | 2.96E-09 | 1447.67 | -22.08 |
| Neurofilament light polypeptide                              | P19527 | SLMPSLENL                                                                             | 8.8E-11  | 1002.51 | -1.86  |
| Neurofilament light polypeptide                              | P19527 | FSYEPY                                                                                | 3.2E-07  | 804.333 | -0.95  |
| Neurofilament heavy polypeptide                              | F1M9Y4 | GLPQEPSKPKTEKAEKSSSTDQKDSQPSEK<br>APEDKAAKGDK                                         | 1.29E-13 | 4381.18 | -1.5   |
| Neurofilament heavy polypeptide                              | F1M9Y4 | LDRLSEAAKVNTDAMRSAQEEITEYRRQL<br>Q                                                    | 4.11E-10 | 3520.77 | 0.78   |
| Neurofilament heavy polypeptide                              | F1M9Y4 | AAQAQAQAEARDALK                                                                       | 3.32E-15 | 1540.8  | 0.09   |
| Neurofilament 3, medium                                      | G3V7S2 | QHKFVEEIIIEETKVEDEK                                                                   | 3.06E-13 | 2229.12 | -0.3   |
| Neurofilament 3, medium                                      | G3V7S2 | PSAYRRVTETRSSFVRVS                                                                    | 7.74E-12 | 2085.07 | -0.32  |
| Neurofilament 3, medium                                      | G3V7S2 | KTKVEAPKLKVQ                                                                          | 9.2E-10  | 1367.85 | -0.78  |
| NEDD8                                                        | Q71UE8 | MLIKVKTTLTGKEIEIDIEPTDKVERIKERVE<br>EKEGIPPOQQRLIYSGKQMNDKTAADYK<br>ILGGSVLHLVLAALRGG | 5.65E-17 | 8554.66 | -0.59  |
| NADH-ubiquinone oxidoreductase chain 2                       | P11662 | STLTLPLSSQLIT                                                                         | 1.3E-12  | 1372.78 | 0.39   |
| NADH-ubiquinone oxidoreductase 75 kDa subunit, mitochondrial | Q66HF1 | EVFVDGQSVMVPEGTTVLQAC                                                                 | 5.16E-14 | 2208.04 | -2.97  |
| NADH dehydrogenase (Ubiquinone) 1 alpha subcomplex, 8        | D4A311 | PGIVELPTLEELKVEEVKVSSAVLKAA                                                           | 2.44E-25 | 2847.61 | -1.95  |
| Myosin regulatory light chain 2, skeletal muscle isoform     | P04466 | KVLDPEGKGTIKKQFLEELLTTQCDR                                                            | 1.25E-09 | 2988.6  | 0.58   |
| Myeloblastosis oncogene-like 1 (Predicted)                   | D3ZF01 | HLQTQNQFYIPIPGYQYVSPDGNCVEHVQ<br>T                                                    | 2.63E-10 | 3474.62 | -2.72  |
| Myelin protein P0                                            | P06907 | KFHKSSKDKSSKRGRQTPVLYAMLDHSRST<br>KAASEKSKKGLGESRKDKK                                 | 4.56E-15 | 5402.91 | -0.6   |
| Myelin protein P0                                            | F1MAN9 | PVLYAMLDHSRSTKAASEKSKKGLGESR<br>KDKK                                                  | 2.86E-26 | 3544.91 | -1.06  |
| MKI67 FHA domain-interacting nucleolar phosphoprotein        | Q5RJM0 | KEEKLNSGVVYLGH                                                                        | 1.48E-13 | 1684.91 | 0.14   |
| Midline-1                                                    | F1M2J9 | YLTAPNPPTIREELCTASYDTITVHW                                                            | 1.85E-05 | 2990.45 | -1.46  |
| Microtubule-associated protein 1B                            | P15205 | KSTPLSDTKKPAALPKVAKKEEPTKKEPI<br>AAGKLDKDKGKVKVIKKEGKTTE                              | 3.3E-12  | 5624.33 | -0.17  |
| Microtubule-associated protein                               | D3ZHY7 | SKANIKHKPGGGDVKIESQKLN                                                                | 1.25E-34 | 2347.3  | 0.31   |
| Mevalonate kinase                                            | P17256 | ETSIGAPGVSMHSATSIEDPVRQALGL                                                           | 2.94E-13 | 2722.36 | -0.17  |
| Metabotropic glutamate receptor 1                            | D3ZSM4 | WTYVSAVHTEGNYGESGMDAF                                                                 | 9.13E-11 | 2319.99 | 7.9    |
| Matrix metalloproteinase 19                                  | C0M4B0 | PMKLNRVENLDAALYWPVNQKVFLFKG<br>SGYWQW                                                 | 1.89E-07 | 4094.1  | 6.97   |
| Matrin-3                                                     | P43244 | VEPFGVISNHLILNKINEAF                                                                  | 2.8E-10  | 2253.21 | -2.47  |
| Mammary cancer associated protein RMT-1                      | Q8VBT7 | AARICPSEGATGRQAGLRSGLSEAAAAP<br>CV                                                    | 6.89E-10 | 2968.5  | 1.49   |

|                                                     |        |                                                                                              |          |         |       |
|-----------------------------------------------------|--------|----------------------------------------------------------------------------------------------|----------|---------|-------|
| Malate dehydrogenase, mitochondrial                 | P04636 | AKVAVLGASGGIGQPLSLL                                                                          | 1.05E-21 | 1750.04 | -0.27 |
| Macrophage migration inhibitory factor              | P30904 | IVNTNVPRASVPEGFLSEL                                                                          | 4.01E-22 | 2041.08 | 0.85  |
| L-lactate dehydrogenase C chain                     | P19629 | SGCNLDSARFRYLIGEKLGVPSSC                                                                     | 5.31E-12 | 2685.3  | 1.58  |
| Lactoylglutathione lyase                            | Q6P7Q4 | IEILNPNKMATII                                                                                | 1.98E-09 | 1468.83 | -0.93 |
| Krueppel-like factor 6                              | O35819 | SDSSEELSPTTKFTSDPIGEVLVNSGNLS                                                                | 2.28E-08 | 3009.41 | -7.6  |
| Insulin-like growth factor 2 mRNA-binding protein 1 | Q8CGX0 | DTKTADEVPLKI                                                                                 | 1.86E-08 | 1328.71 | -5.17 |
| Importin subunit alpha-6                            | Q56R16 | SSTVPIPEEDMITADMIQMFSSNAEQ                                                                   | 1.72E-10 | 3010.34 | -5.8  |
| Hypothetical LOC294883                              | Q569A4 | GKGVFSMKGGSRSSVGGSSSSGSKLKSDE<br>LQTI                                                        | 5.41E-09 | 3244.65 | 4.36  |
| HtrA serine peptidase 2                             |        | DVRQGEFVVAMGSPFALQNTIT                                                                       | 1.19E-12 | 2379.2  | 2.96  |
| Hsc70-interacting protein                           | P50503 | KERIERVKKAREEHEKAQREEEARRQSGS<br>Q                                                           | 6.32E-21 | 3676.92 | -0.13 |
| Histone H3.3                                        | P84245 | RFQSAAGALQEASEAYL                                                                            | 9.24E-47 | 1923.97 | -0.76 |
| Histone H3.1                                        | Q6LED0 | RFQSSAVMALQEACEAYL                                                                           | 2.68E-08 | 2015.96 | 7.85  |
| Histone H3                                          | D3ZJ08 | ARTKQTARKSTGGKAPRQQLATKAARKS<br>APATGGVKKPHRYRPGTVAL                                         | 1.29E-06 | 5052.92 | 0.05  |
| Histone H3                                          | D3ZJ08 | RFQSSAVMALQEASEAY                                                                            | 2.44E-30 | 1886.88 | -0.88 |
| Histone H2B                                         | G3V8B3 | VYKVLKQVHPDTGISSKAMGIMNSFVNDI<br>FERIAGEASRLAHYNKRSTITSREIQTAVR<br>LLPGELAKHAVSEGTKAVTKYTSSK | 1.38E-23 | 9341.99 | 0.28  |
| Histone H2B                                         | G3V8B3 | VNDIFERIAGEASRLAHYNKRSTITSREIQT<br>AVRLLLPGELAKHAVSEGTKAVTKYTSSK                             | 2.3E-10  | 6610.58 | 1.73  |
| Histone H2B                                         | G3V8B3 | ERIAGEASRLAHYNKRSTITSREIQTAVRL<br>LLPGELAKHAVSEGTKAVTKYTSSK                                  | 4.3E-47  | 6022.28 | 0.09  |
| Histone H2B                                         | G3V9C7 | NDIFERIAGEASRLAHYNKRSTITSREIQT                                                               | 9.6E-18  | 3546.83 | 0.38  |
| Histone H2B                                         | G3V9C7 | NDIFERIAGEASRLAHYNKRSTITSREIQT                                                               | 8.85E-10 | 3475.79 | -0.71 |
| Histone H2B                                         | G3V8B3 | LLPGELAKHAVSEGTKAVTKYTSSK                                                                    | 1.94E-38 | 2614.43 | -0.22 |
| Histone H2B                                         | G3V8B3 | PGELAKHAVSEGTKAVTKYTSSK                                                                      | 2.83E-19 | 2388.27 | 0.31  |
| Histone H2B                                         | G3V9C7 | AGEASRLAHYNKR                                                                                | 4.96E-20 | 1471.76 | -1.4  |
| Histone H2A.J                                       | A9UMV8 | VGAGAPVYLAHVLEYLTAEILELAGNAA<br>R                                                            | 1.31E-64 | 2914.58 | -1.22 |
| Histone H2A type 1                                  | P02262 | QLAIRNDEELNKLKGKVTIAQGGVLPNIQ<br>AVLLPKKTESHHKAKGK                                           | 9.46E-19 | 4996.88 | 2.13  |
| Histone H2A type 1                                  | P02262 | PNIQAVLLPKKTESHHKAKGK                                                                        | 7.16E-15 | 2323.34 | -2.61 |
| Histone H2A type 1                                  | P02262 | IQAVLLPKKTESHHKAKGK                                                                          | 1.14E-32 | 2112.25 | -0.6  |
| Histone H2A                                         | D4ACV3 | ILELAGNAARDNKKTRIIPRHLQLAIRNDE<br>ELNKLKGKVTIAQGGVLPNIQAVLLPKKT<br>ESHKAKSK                  | 3.3E-10  | 7370.25 | -1.23 |
| Histone H2A                                         | D4ACV3 | VGAGAPVYMAAVLEYLTAEILELAGNAA<br>R                                                            | 6.91E-41 | 2932.54 | -0.94 |
| Histone H2A                                         | D4ACV3 | AGNAARDNKKTRIIPRHLQL                                                                         | 3.67E-18 | 2271.3  | -0.91 |
| Histone H2A                                         | D4ACV3 | KSRSSRAGLQFPVGRVHR                                                                           | 2.8E-12  | 2037.15 | 0.7   |
| Histone H1.4                                        | P15865 | KASGPPVSELITKAVAASKERSGVSLAAL                                                                | 2.21E-13 | 2836.6  | 0.01  |
| Histone H1.4                                        | P15865 | ASGPPVSELITKAVAASKERSGVSLAAL                                                                 | 1.15E-14 | 2708.51 | -1.5  |
| Histone H1.4                                        | P15865 | KKALAAAGYDVEKNNSRIKLG                                                                        | 3.66E-10 | 2245.25 | -0.56 |



|                                                  |        |                                                                            |          |         |       |
|--------------------------------------------------|--------|----------------------------------------------------------------------------|----------|---------|-------|
| High mobility group nucleosomal binding domain 2 | Q4KLJ0 | PKRKAEGDAKGDKAKVKDEPQRRSARLS<br>A                                          | 4.11E-43 | 3191.76 | -1.12 |
| Heterogeneous nuclear ribonucleoprotein C        | P17132 | IFVGGGLSPDTPEEKIREYFGGFGEVESIEL                                            | 2.08E-16 | 3313.64 | -0.14 |
| Heterogeneous nuclear ribonucleoprotein C        | P61980 | TGTQDQIQNAQYLLQNSVKQYSGKFF<br>GDLSSASAIMGNPKVKAHGKKVINAFND<br>GLKHLNLIKGTG | 2.7E-19  | 3005.49 | 1.64  |
| Hemoglobin subunit beta-1                        | P02091 | FDSFGDLSSASAIMGNPKVKAHGKK                                                  | 4.99E-12 | 4192.22 | 0.53  |
| Hemoglobin subunit beta-1                        | P02091 | LVVYPWTQRYFDSF                                                             | 4.06E-38 | 1819.89 | -1.08 |
| Hemoglobin subunit beta-1                        | P02091 | GKVNPDVVGGEALGRLL                                                          | 6.8E-34  | 1708.91 | -0.92 |
| Hemoglobin subunit beta-1                        | P02091 | GKVNPDVVGGEALGRLL                                                          | 1.23E-42 | 1595.83 | -0.54 |
| Hemoglobin subunit beta-1                        | P02091 | KVNPDVVGGEALGRLL                                                           | 7.03E-13 | 1538.81 | 0.09  |
| Hemoglobin subunit beta-1                        | P02091 | VNPDVVGGEALGRLL                                                            | 3.12E-10 | 1523.79 | 1.34  |
| Hemoglobin subunit beta-1                        | P02091 | NPDDVVGGEALGRLL                                                            | 6.79E-20 | 1424.73 | -1.03 |
| Hemoglobin subunit beta-1                        | P02091 | LVVYPWTQRY                                                                 | 4.72E-31 | 1323.7  | -1.11 |
| Hemoglobin subunit beta-1                        | P02091 | NPDDVVGGEALGRLL                                                            | 4.28E-33 | 1311.64 | -0.51 |
| Hemoglobin subunit beta-1                        | P02091 | DDVVGGEALGRLL                                                              | 8.27E-28 | 1213.63 | -1.21 |
| Hemoglobin subunit beta-1                        | P02091 | VVYPWTQRY                                                                  | 1.87E-28 | 1210.61 | -1.38 |
| Hemoglobin subunit beta-1                        | P02091 | PDDVVGGEALGRLL                                                             | 1.87E-27 | 1197.6  | 0.03  |
| Hemoglobin subunit beta-1                        | P02091 | DDVVGGEALGRLL                                                              | 3.95E-36 | 1100.55 | -0.51 |
| Hemoglobin subunit beta-1                        | P02091 | DVGGEALGRLL                                                                | 2.03E-27 | 1098.6  | -0.61 |
| Hemoglobin subunit beta-1                        | P02091 | DVGGEALGRLL                                                                | 5.89E-30 | 985.519 | -0.47 |
| Hemoglobin subunit beta-1                        | P02091 | VGGEALGRLL                                                                 | 2.05E-18 | 983.577 | -0.88 |
| Hemoglobin subunit beta-1                        | P02091 | VGGEALGRLL                                                                 | 2.83E-21 | 870.492 | -0.53 |
| Hemoglobin subunit beta-1                        | P02091 | PWTQRY                                                                     | 7.11E-14 | 849.413 | -2.08 |
| Hemoglobin subunit alpha-1/2                     | P01946 | SHIDVSPGSAQVKAHGKKVADALAKAAD<br>HVEDLPGALST                                | 1.71E-11 | 3890.03 | 0.24  |
| Hemoglobin subunit alpha-1/2                     | P01946 | AADHVEDLPGALSTLSDLHAHKL                                                    | 1.13E-15 | 2409.23 | -1.06 |
| Hemoglobin subunit alpha-1/2                     | P01946 | YFSHIDVSPGSAQVKAHGKKV                                                      | 1.5E-07  | 2254.19 | -0.61 |
| Hemoglobin subunit alpha-1/2                     | P01946 | EDLPGALSTLSDLHAHKL                                                         | 3.28E-11 | 1916    | -0.14 |
| Hemoglobin subunit alpha-1/2                     | P01946 | HHPGDFTPAMHASLDK                                                           | 5.89E-19 | 1759.81 | -0.21 |
| Hemoglobin subunit alpha-1/2                     | P01946 | KFLSHCLLV                                                                  | 2.32E-08 | 1159.64 | 0.03  |
| Heat shock protein beta-1                        | D3ZNT4 | PFSLLRSPSWEPFRDWYPAHSRLFDQA                                                | 1.98E-16 | 3304.62 | 0.46  |
| Heat shock protein beta-1                        | D3ZNT4 | FGVPRFPDEWSQWFSSAGWPGYVR                                                   | 1.58E-07 | 2857.34 | -1.39 |
| Heat shock protein beta-1                        | D3ZNT4 | PFSLLRSPSWEPFRDWYPAHSRL                                                    | 1.97E-27 | 2843.43 | 0.58  |
| Heat shock protein beta-1                        | D3ZNT4 | AAPAFSRALNRQLSSGVSEIRQT                                                    | 1.47E-12 | 2458.3  | 0.42  |
| Heat shock protein beta-1                        | D3ZNT4 | SSGVSEIRQTADRWRVSL                                                         | 6.17E-12 | 2046.06 | 0.21  |
| Heat shock protein beta-1                        | D3ZNT4 | RSPSWEPFRDWYPAHS                                                           | 1.09E-06 | 2016.92 | 1.26  |
| Heat shock 27kDa protein 1                       | G3V913 | PRFPDEWSQWFSSAGWPGYVRPLPAATA<br>EGPAAVTL                                   | 8.74E-13 | 3913.91 | -3.62 |

|                                                       |        |                                                                                              |          |         |       |
|-------------------------------------------------------|--------|----------------------------------------------------------------------------------------------|----------|---------|-------|
| Heat Shock Protein 70                                 | F1LZI1 | VVTVPAYFNDSQRQATK DAGTIAGLNVL                                                                | 4.63E-22 | 2947.55 | 2.45  |
| H2-K region expressed gene 2, rat orthologue          | Q6MGC4 | ESQLRDLERQSEQQRETLAQLQQEFQRAQ<br>NAKAPGKA                                                    | 6.84E-14 | 4309.19 | 0.24  |
| Guanine nucleotide-binding protein G(q) subunit alpha | D4AE68 | VDLNPDSDKIYSHFTCATDTENIRFVFAA<br>VKDTI                                                       | 1.25E-09 | 3957.96 | 1.75  |
| Gamma-synuclein                                       | D4ACB0 | YVGTKTKENVVQSVTSVAEKTKEQANAV<br>SEAVVSSVNTVATKTVEEAENIVTTGVV<br>RKEDLEPPAQDQEAKEQEEGEEAKSGGD | 5.59E-23 | 9001.48 | -0.26 |
| Gamma-synuclein                                       | D4ACB0 | VGTKTKENVVQSVTSVAEKTKEQANAVS<br>EAVVSSVNTVATKTVEEAENIVTTGVVR<br>KEDLEPPAQDQEAKEQEEGEEAKSGGD  | 6.72E-20 | 8838.41 | -0.57 |
| Gamma-synuclein                                       | D4ACB0 | TKTKENVVQSVTSVAEKTKEQANAVSEA<br>VVSSVNTVATKTVEEAENIVTTGVVRKE<br>DLEPPAQDQEAKEQEEGEEAKSGGD    | 5.85E-08 | 8682.32 | -1.32 |
| Gamma-synuclein                                       | D4ACB0 | KENVVQSVTSVAEKTKEQANAVSEAVVS<br>SVNTVATKTVEEAENIVTTGVVRKEDLE<br>PPAQDQEAKEQEEGEEAKSGGD       | 1.25E-12 | 8352.14 | 0.48  |
| Gamma-synuclein                                       | F1LQ96 | SVAEKTKEQANAVSEAVVSSVNTVATKT<br>VEEAENIVTTGVVRKEDLEPPAQDQEAKE<br>EQEEGEEAKSGGD               | 9.52E-58 | 7367.61 | -0.1  |
| Gamma-synuclein                                       | F1LQ96 | KTKEQANAVSEAVVSSVNTVATKTVEEA<br>ENIVTTGVVRKEDLEPPAQDQEAKEQEE<br>GEEAKSGGD                    | 5.21E-39 | 6981.43 | 0.25  |
| Gamma-synuclein                                       | F1LQ96 | LEPPAQDQEAKEQEEGEEAKSGGD                                                                     | 4.65E-07 | 2570.13 | -0.49 |
| Gamma-enolase                                         | P07323 | AGNSDLILPVPFNVINGGSHAGNKLAMQ<br>EF                                                           | 7.52E-14 | 3180.6  | -0.68 |
| Gamma-enolase                                         | P07323 | AGNSDLILPVPFNVINGGSHAGNKL                                                                    | 7.56E-15 | 2574.36 | 0.83  |
| Galectin-1                                            | P11762 | NLKPGECKVRGELAPDAKSFVLNLGKDS<br>NNL                                                          | 1.55E-21 | 3438.83 | 1.2   |
| Galectin-1                                            | P11762 | NLKPGECKVRGELAPDAKSFVL                                                                       | 5.59E-24 | 2483.36 | 0.34  |
| Galectin-1                                            | P11762 | PDGHEFKFPNRLNMEAI                                                                            | 2.52E-07 | 2013.97 | 0.91  |
| Galectin-1                                            | P11762 | AADGDFKIKCVAFE                                                                               | 1.75E-09 | 1512.73 | -0.17 |
| Galectin-1                                            | P11762 | LAPDAKSFVLNL                                                                                 | 2.22E-10 | 1286.72 | 0.11  |
| Fructose-bisphosphate aldolase A                      | P05065 | PHPYPALTPEQKKEADIAHRIVAPGKGIL<br>A                                                           | 3.26E-24 | 3329.86 | -0.11 |
| Fructose-bisphosphate aldolase A                      | P05065 | SYGRALQASALKAWGGKKNLKAAQEE                                                                   | 8.37E-14 | 2903.53 | 0.49  |
| Fructose-bisphosphate aldolase A                      | P05065 | IKRALANSLACQKGYTPSGQSGAAASES                                                                 | 8.29E-30 | 2765.38 | 0.81  |
| Fructose-bisphosphate aldolase A                      | P05065 | SNEEIAMATVTALRRTPPAVPGVT                                                                     | 1.99E-15 | 2579.37 | -0.37 |
| Far upstream element-binding protein 1                | Q32PX7 | NFIVPTGKTGLIIGKGETIKSISQQSGARIE<br>L                                                         | 2.41E-11 | 3411.91 | 0.24  |
| Ezrin                                                 | P31977 | FEQKTKRAEKELSEQIEKALQLEE                                                                     | 4.55E-12 | 2903.52 | -0.61 |
| Exocyst complex component 2                           | F1LMB9 | GEASVFQPKTQEEVCQL                                                                            | 4.04E-11 | 2019.95 | -5.13 |
| Eukaryotic translation initiation factor 4H           | F8WG14 | QVANPNSAIFGGARPREEVVQKEQE                                                                    | 7.82E-14 | 2752.38 | -2.35 |
| Eukaryotic translation initiation factor 4H           | F8WG14 | AIFGGARPREEVVQKEQE                                                                           | 8.38E-14 | 2042.05 | 0.6   |
| Eukaryotic translation initiation factor 4B           | Q5RKG9 | LGNLPHYDVTEDSIKDFRGLNISAV                                                                    | 2.8E-10  | 2782.42 | -0.74 |
| Eukaryotic translation initiation factor 4B           | Q5RKG9 | GNLPHYDVTEDSIKDFRGLNISAV                                                                     | 5.31E-14 | 2669.33 | 0.31  |

|                                                       |        |                                                              |          |         |       |
|-------------------------------------------------------|--------|--------------------------------------------------------------|----------|---------|-------|
| Eukaryotic translation initiation factor 1A, Y-linked | B5DF60 | NADEARSLKAYGELPEHAK                                          | 3.25E-07 | 2098.04 | 0.16  |
| Eukaryotic translation initiation factor 1            | B0K008 | IGLAKDDQLKVHGF                                               | 2.31E-09 | 1539.84 | -0.3  |
| Estradiol 17-beta-dehydrogenase 2                     | Q62730 | VNVSSMGAMIPQMVA                                              | 7.39E-07 | 1680.8  | -1.76 |
| Erythrocyte protein band 4.1-like 3                   | A3E0T0 | QTRRASALIDRPAPYFE                                            | 7.5E-15  | 1990.04 | -0.33 |
| ELKS/Rab6-interacting/CAST family member 1            | D3ZC47 | EAEMHVHHLESLEQKE                                             | 3E-13    | 2057.97 | -2.75 |
| Ecotropic viral integration site 2A                   | Q5HZW9 | LFLICTFLFLSTVVL                                              | 1.21E-08 | 1727.98 | -6.06 |
| E3 ubiquitin-protein ligase TRIM9                     | D3ZP18 | PHQLSLHSSLQSLNAPGCNFETQSASYSQLVDIKKLLAVAWFAFD                | 2.32E-10 | 4960.49 | 0.19  |
| Dynein heavy chain 1, axonemal                        | Q63164 | LQEDLKLFSGIVSDL                                              | 6.04E-15 | 1675.9  | -2.31 |
| DNA primase                                           | Q5M832 | KTGRISVPIDFQKVDQFDPFVVPTISAICRELDVVSTTEKEKE                  | 1.62E-08 | 4863.6  | 11.42 |
| Dihydropyrimidinase-related protein 2                 | P47942 | SAKTSPAKQQAPPVRNLHQSGFSLSGAQIDDNIPRRTTQRIVAPPGGRANITSLG      | 1.61E-24 | 5761.06 | -0.5  |
| Dihydropyrimidinase-related protein 2                 | P47942 | QSGFSLSGAQIDDNIPRRTTQRIV                                     | 2.84E-23 | 2658.37 | -2.28 |
| Desumoylating isopeptidase 1                          | F1M410 | AGCPRAIVAAATGP                                               | 4.48E-13 | 1253.67 | 4.81  |
| Deoxyribonuclease                                     | D3ZF29 | EVRDPDL SAVSLLMEQINSVSKHE                                    | 6.89E-07 | 2695.36 | 3.54  |
| DEAH (Asp-Glu-Ala-His) box polypeptide 9 (Predicted)  | D4A9D6 | LDAVIEAEHTLRELDALDANDELTPGRIL                                | 3.13E-13 | 3314.73 | -2.8  |
| D(1A) dopamine receptor                               | P18901 | KAVAEIAGFWPLGPFNCNIWVA                                       | 3.39E-13 | 2288.18 | 3.42  |
| Cytochrome c, somatic                                 | P62898 | SYTDANKNKGITWGEDTLMEYLENPKKYIPGTKM                           | 6.83E-13 | 3934.9  | -1.47 |
| Cytochrome c oxidase subunit 7C, mitochondrial        | P80432 | SHYEEGPGKNLPPFSVENKWRLLLMMTVYFGSGFAAPFFIVRHQLLKK             | 1.29E-28 | 5481.85 | -4.55 |
| Cytochrome c oxidase subunit 7C, mitochondrial        | P80432 | TVYFGSGFAAPFFIVRHQLLKK                                       | 1.66E-12 | 2525.39 | -0.94 |
| Cytochrome c oxidase subunit 7A2, mitochondrial       | P35171 | FENKVPEKQKLFQEDNGMPVHLKGGTSDALLYRATMLLTVGGTAYAIYMLAMAAPFKKQN | 1.67E-16 | 6644.41 | -0.13 |
| Cytochrome c oxidase subunit 5A, mitochondrial        | P11240 | ELRPTLNELGISTPEELGLDKV                                       | 4.57E-34 | 2422.3  | -1.6  |
| Cytochrome c oxidase subunit 5A, mitochondrial        | P11240 | ELRPTLNELGISTPEELGL                                          | 1.11E-18 | 2080.11 | 1.6   |
| Cytochrome b-c1 complex subunit 7                     | B2RYS2 | LKEVIRERKEREWAKK                                             | 1.18E-20 | 2226.26 | -0.43 |
| Cysteine-rich protein 1                               | P63255 | SAMFGPKGFGRGGAESHTEFK                                        | 1.58E-14 | 2068    | -0.37 |
| Crystallin, zeta (Quinone reductase)-like 1           | Q5XI39 | KEFFPVGREAVAGIVLDVGGKVSFFQPDD                                | 2.98E-10 | 3122.64 | 1.45  |
| Creatine kinase M-type                                | P00564 | MVEMEKKLEKQSIDDMIPAQK                                        | 1.12E-15 | 2547.27 | -0.34 |
| Copper transport protein ATOX1                        | Q9WUC4 | IESEHSSDILLATLNKTGKAVSYLGPK                                  | 1.56E-27 | 2870.54 | -0.93 |
| Contactin-5                                           | P97527 | FYRQEGHSGKQVIETQKPQAVVPLPEAGVYIIEVRAYSEGGDGTAS               | 2.68E-08 | 4960.49 | -1.95 |
| Collagen alpha-1(II) chain                            | P05539 | GGPGFLGAPGAKGEAGPTGARGPEG                                    | 1.99E-13 | 2164.07 | 2.93  |
| Coagulation factor II, isoform CRA_a                  | G3V843 | FEKKSLTDKTEKELLSYIDGR                                        | 5.55E-26 | 2614.35 | 0.43  |

|                                                 |        |                                                 |          |         |       |
|-------------------------------------------------|--------|-------------------------------------------------|----------|---------|-------|
| Clathrin coat assembly protein AP180            | D3ZJG9 | SPSPTPATQSPKKPPAKDPLADLNKDFL                    | 5.3E-13  | 3072.65 | -1.36 |
| Chromatin modifying protein 2A                  | B2RZB5 | SLTDELSNLPSTGGSLSVAAAGGKKAATA<br>SALADADADLEERL | 6.37E-10 | 4201.11 | 3.89  |
| Cytochrome c oxidase subunit 5A, mitochondrial  | P11240 | RPTLNELGISTPEELGLDKV                            | 1.45E-10 | 2180.17 | 0.43  |
| Cytochrome c oxidase subunit 5A, mitochondrial  | P11240 | VGVDLVPEPKIIDA                                  | 5.57E-16 | 1527.82 | -0.3  |
| Actin, gamma-enteric smooth muscle              | P63269 | PLNPKANREKMTQIMFETF                             | 2.13E-12 | 2294.16 | -1.99 |
| Serine protease inhibitor A3N                   | P09006 | SAKLDPLIIAFDRPFLMIISDTETAIAPFLAK<br>IFNPK       | 6.27E-09 | 4116.27 | -0.09 |
| Myelin protein P0                               | P06907 | DSSKRGRQTPVLYAML DHSRSTKAASEK<br>KSKGLGESRKDKK  | 5.39E-24 | 4560.43 | -2.29 |
| Myelin protein P0                               | P06907 | RGRQTPVLYAML DHSRSTKAASEK KSKG<br>LGESRKDKK     | 2.85E-15 | 4143.24 | 0.13  |
| Lipoprotein lipase                              | Q06000 | ISLYGTVAESENIPFTLP                              | 1.49E-09 | 1949.99 | -7.37 |
| Cytochrome c oxidase subunit 6A1, mitochondrial | P10818 | PPFWGDGNHTLFHNPHMNPLPTGYEDE                     | 8.04E-15 | 3118.37 | -0.5  |
| Hereditary hemochromatosis protein homolog      | O35799 | SLKGWDYMFIVDFWTIMGN                             | 1.48E-08 | 2322.09 | -2.96 |
| ATPase inhibitor, mitochondrial                 | Q03344 | REKTREQLAALKKHHEDEIDHHSKEIER                    | 9.64E-19 | 3461.78 | -2.13 |
| Alpha-1-antiproteinase                          | P17475 | LPPQVKFDHPFIFMIVESETQSPLFVGKVID<br>PTR          | 6.75E-14 | 3911.07 | -1.12 |
| Heparin cofactor 2                              | Q64268 | STQVRFTVDRPFLFLVYEHRTSCLLFMGR<br>VANPAKS        | 5.65E-09 | 4185.18 | -0.4  |
| Inhibin beta C chain                            | Q9WUK5 | VAGMPGISASFHTAVLNLLKANTDAGTA<br>RRGSCCVPT       | 3.51E-07 | 3685.85 | -0.1  |
| Prolargin                                       | Q9EQP5 | LDSNKIETIPSGYFKDFPNLA                           | 1.62E-10 | 2368.19 | -2.18 |
| Chymase                                         | P50339 | AGIAQGIASYVHPNAKPPAVFT                          | 8.59E-17 | 2208.17 | 0.42  |
| Chymase                                         | P50339 | RISHYRPWINKILREN                                | 3.74E-11 | 2094.16 | 0.06  |
| Mast cell protease 1                            | P09650 | TRISPYVPW                                       | 1.66E-10 | 1117.59 | -0.33 |
| Mast cell protease 2                            | P09650 | VCAGVAHGIVS                                     | 9.97E-09 | 1011.52 | -0.26 |
| Midkine                                         | Q9R1S9 | STGTKARQGTLKKARYNAQCQETIRVTKP<br>C              | 5.08E-09 | 3336.75 | 1.12  |
| Alpha-2-HS-glycoprotein                         | P24090 | SVESASGEVLHSPKVGQPGDAGAAGPVAP<br>LCPGRVRYFKI    | 7.02E-22 | 4003.07 | 0.41  |
| Lumican                                         | P51886 | YLDNNKITNIPDEYFNRFGLQYL                         | 3.67E-14 | 2950.45 | -0.33 |
| Lumican                                         | P51886 | IYLQHNQLKEEAVSASLKGKLSLE                        | 2.75E-20 | 2697.47 | -0.21 |
| Fibroblast growth factor 1                      | P61149 | SNGGHFLRILPDGTVDGTRDRSDQHIQL                    | 3.78E-18 | 3103.55 | 0.01  |
| Fibroblast growth factor 1                      | P61149 | ILFLPLPV                                        | 1.39E-14 | 910.589 | -0.18 |
| Mast cell carboxypeptidase A                    | P21961 | IRSHLNSIKA                                      | 1.33E-19 | 1137.66 | 1.26  |
| Mast cell protease 1-like 4                     | Q6IE57 | SNIHDI MLK                                      | 4.9E-14  | 1182.64 | -0.31 |
| Cathepsin L1                                    | P07154 | AVATVGPISV                                      | 4.2E-15  | 912.528 | 0.81  |
| Cathepsin B                                     | P00787 | SYSVSDSEKEIMAEIYKNGPVE                          | 1.49E-17 | 2474.15 | -1.97 |
| Ubiquitin-60S ribosomal protein L40             | P62986 | IIEPSLRQL                                       | 1.34E-09 | 1067.63 | 0.13  |
| Centrosomal protein of 63 kDa                   | D3ZLK6 | EAQRKALAEQSEIIQA                                | 1.29E-11 | 1783.94 | 0.52  |
| Centromere protein Q                            | F1LQ20 | EIDKIVETTESMTENIESLKTKEILTNEVE                  | 1.17E-07 | 3577.89 | 19.55 |

|                                                                      |          |                                                                                      |          |         |        |
|----------------------------------------------------------------------|----------|--------------------------------------------------------------------------------------|----------|---------|--------|
| CD248 antigen, endosialin (Predicted)                                | D3ZN06   | CQAGRGTSLLCVKQPSGGVGWS                                                               | 9.54E-14 | 2190.09 | 7.37   |
| CARg-binding factor A                                                | Q9QX80   | PIDPKLNKRRGFVFITF                                                                    | 2.9E-11  | 2047.17 | -0.37  |
| Cappuccino homolog (Mouse)                                           | G3V6R9   | EAFVRMIG                                                                             | 2.1E-06  | 921.484 | 6.66   |
| Calpastatin                                                          | E9PT27   | STLNKLSDKSGVNAALDDLIDTLGECEDT<br>NKDDPPYTGPVVLDPMDDSTYLEALGI                         | 3.3E-09  | 5837.79 | -0.37  |
| Beta-soluble NSF attachment protein                                  | P85969   | HDSATSFVDAGNAYKKADPQEAINCLNA<br>AI                                                   | 4.62E-07 | 3133.47 | -1.74  |
| Beta-2 adrenergic receptor                                           |          | HWYRATHKQAIDCYAKET                                                                   | 5.77E-09 | 2220.04 | -3.36  |
| ATP synthase-coupling factor 6, mitochondrial                        | P21571   | NKELDPVQKFLDKIREYKAKRLASGGPV<br>DTGPEYQQEVDRELFKFKQMYGKKGEMD<br>KFPTNFEDPKFEVLDPKQPS | 2.37E-09 | 8921.55 | -0.24  |
| ATP synthase-coupling factor 6, mitochondrial                        | P21571   | ASGGPVDTGPEYQQEVDRELFKFKQMYG<br>KKGEMDKFPTNFEDPKFEVLDPKQPS                           | 6.65E-11 | 6095.91 | -1.45  |
| ATP synthase subunit e, mitochondrial                                | P29419   | VPPVQVSPLIKFGRYSALILGMAYGAKRY<br>SYLKPRAEEERRIAAEEKKRLDELKRIERE<br>LAEAVEDVSIFK      | 2.24E-20 | 8118.44 | -0.12  |
| ATP synthase subunit e, mitochondrial                                | P29419   | VPPVQVSPLIKFGRYSALIL                                                                 | 9.14E-25 | 2196.3  | -0.53  |
| ATP synthase subunit beta, mitochondrial                             | P10719   | DEGLPPILNA                                                                           | 1.58E-12 | 1037.54 | 0.13   |
| AT rich interactive domain 4A (Rbp1 like) (Predicted), isoform CRA_b | D4ADE4   | QFRTIIHHHEPKVKEEK                                                                    | 1.74E-11 | 2042.05 | -13.94 |
| Argininosuccinate lyase                                              | Q4QRB8   | IRWSHWILSHAVALTRDLERLKEVQKRIN<br>VLPLGSGAIAGNPLGVDREFLCAELNFGA                       | 5.56E-09 | 6448.49 | 11.12  |
| Apoptosis regulator BAX                                              | Q9JKL3   | MKTGAFLQGFQIDRAERMAGETPEL                                                            | 6.05E-10 | 2908.48 | 6.72   |
| Antisense paternally expressed gene 3                                | Q810D7   | HSLKAKTLRFTGKSFHFHEFTIKRTMSWL<br>ENKNPTLKNSTNVTIFCMKTT                               | 1.49E-07 | 5918.11 | 0.6    |
| AN1-type zinc finger protein 6                                       | Q6DGF4   | PGPVSNQSLLSESVAPSQVDSTSVDK                                                           | 1.71E-10 | 2627.3  | 2.64   |
| Histone H4                                                           | P62804-2 | DVVYALKRQGRPLYGFGG                                                                   | 8.22E-27 | 1999.06 | -0.38  |
| Histone H4                                                           | P62804-2 | YALKRQGRPLYGFGG                                                                      | 2.41E-19 | 1685.9  | -0.69  |
| Microtubule-associated protein 2                                     | P15146-2 | DEELEVLMAAEAQAEPKDGSPPDAPATPE                                                        | 4.56E-12 | 2909.33 | 5.37   |
| Alt Splice Form D3 dopamine receptor                                 | P19020-2 | LRERALQTTTNYL                                                                        | 5.16E-08 | 1577.86 | 5.98   |
| cAMP-regulated phosphoprotein 19                                     | Q712U5-2 | MKNKQLPAAAPDKTEVTGDHIPTQDLPO<br>RKPSLVASKLAG                                         | 5.44E-09 | 4347.34 | 0.1    |
| Myelin basic protein S                                               | P02688-5 | AEGQKPGFGYGGGRASDYKSAHKGFKGAY<br>DAQGTLISKIFKLGGDRSRSGSPMARR                         | 2.73E-13 | 5705.88 | -0.06  |
| Myelin basic protein S                                               | P02688-5 | RASYDKSAHKGFKGAYDAQGTLISKIFKL<br>GGDRSRSGSPMARR                                      | 1.22E-07 | 4557.35 | -0.12  |
| Myelin basic protein S                                               | P02688-4 | GKGRGLSLSRFSWGGDRSRSGSPMARR                                                          | 1.13E-06 | 2920.51 | 0.39   |
| Myelin basic protein S                                               | P02688-4 | KGRGLSLSRFSWGGDRSRSGSPMARR                                                           | 2.9E-10  | 2863.48 | -1.38  |
| Myelin basic protein S                                               | P02688-4 | GRGLSLSRFSWGGDRSRSGSPMARR                                                            | 1.74E-11 | 2735.39 | 0.27   |
| Myelin basic protein S                                               | P02688-4 | RGLSLSRFSWGGDRSRSGSPMARR                                                             | 9.09E-16 | 2678.37 | 0.27   |
| Myelin basic protein S                                               | P02688-4 | LSLSRFSWGGDRSRSGSPMARR                                                               | 3.11E-10 | 2465.25 | 0.14   |
| Myelin basic protein S                                               | P02688-4 | SLSRFSWGGDRSRSGSPMARR                                                                | 1.47E-09 | 2352.16 | -0.75  |
| E3 ubiquitin-protein ligase                                          | Q9JK66-5 | FAGKELQNHLTVQNCLE                                                                    | 1.31E-15 | 2057.98 | -1.93  |
| Myelin basic protein S                                               | P02688-4 | FKNIVTPRTPPPSQGKGRGLSLSRFSWGG<br>DRSRSGSPMARR                                        | 2.89E-21 | 4483.36 | -0.62  |
| Myelin basic protein S                                               | P02688-4 | SGDRGAPKRGSGKDSHTRTTHYGSLPQKS                                                        | 1.9E-35  | 4371.16 | -0.31  |

|                                               |          |                                                       |          |         |        |
|-----------------------------------------------|----------|-------------------------------------------------------|----------|---------|--------|
|                                               |          | QRTQDENPVVH                                           |          |         |        |
| Myelin basic protein S                        | P02688-4 | KNIVTPRTPPPSQGKGRGLSLSRFSWGGR<br>DSRSGSPMARR          | 2.84E-15 | 4336.3  | 0.05   |
| Myelin basic protein S                        | P02688-4 | GAPKRGSGKDSHTRTTHYGSLPQKSQRTQ<br>DENPVVH              | 2.17E-13 | 3955.98 | 0.44   |
| Myelin basic protein S                        | P02688-4 | TPRTPPPSQGKGRGLSLSRFSWGGRDSRS<br>GSPMARR              | 3.51E-17 | 3882    | -0.09  |
| Myelin basic protein S                        | P02688-4 | STMDHARHGFLPRHRDTGILDSIGRFFSGD<br>R                   | 6.92E-07 | 3553.74 | -1.82  |
| Myelin basic protein S                        | P02688-4 | TPPPSQGKGRGLSLSRFSWGGRDSRSGSP<br>MARR                 | 1.27E-12 | 3527.8  | -0.59  |
| Myelin basic protein S                        | P02688-4 | SIGRFFSGDRGAPKRGSGKDSHTRTTHYG                         | 7.15E-12 | 3134.54 | -2.64  |
| Myelin basic protein S                        | P02688-4 | GAPKRGSGKDSHTRTTHYGSLP                                | 7.53E-12 | 2309.16 | 0.41   |
| Myelin basic protein S                        | P02688-4 | RFSWGGRDSRSGSPMARR                                    | 1.55E-10 | 2065.01 | -0.08  |
| Myelin basic protein S                        | P02688-4 | TPRTPPPSQGKGRGLSLSR                                   | 5.18E-13 | 1991.1  | -0.13  |
| Myelin basic protein S                        | P02688-4 | TPPPSQGKGRGLSLSRF                                     | 2.29E-11 | 1783.97 | -1.05  |
| Myelin basic protein S                        | P02688-4 | TPPPSQGKGRGLSLSR                                      | 3.06E-11 | 1636.9  | 0.14   |
| Myelin basic protein S                        | P02688-4 | SWGGRDSRSGSPMAR                                       | 2.85E-10 | 1605.74 | -0.29  |
| Serine protease HTRA3                         | D3ZA76-2 | GEFVVAIGSPFALQNTVTTGIVSTAQRDG                         | 4.12E-08 | 2934.53 | 5.16   |
| Rho GTPase-activating protein 20              | Q6REY9-2 | QGSKDSASPSQLQEPFLMEQLPREMQCQF<br>ILKPTRLATAQQLSDSSHKT | 3.15E-10 | 5514.72 | -2.37  |
| Protein Hikeshi                               | Q5M808-2 | MNIVRTPSVAQIGISVELLDSLAQQTPVGS                        | 1.45E-08 | 3122.71 | 16.44  |
| Microtubule-associated protein 6              | Q63560-2 | RTEGHEEKPLPPAQSQTQEGGPAAGKASG<br>ADQRDTRRKAGPA        | 4.89E-22 | 4337.15 | -2.27  |
| Microtubule-associated protein 7              | Q63560-2 | SADARDPEGAGGAGVPAAGKASGADQR<br>DTRRKAGPA              | 5.02E-13 | 3390.67 | -0.17  |
| Microtubule-associated protein 4              | Q5M7W5-2 | ADPFNVHDDGLADLLFVSSGPTNA                              | 7.59E-10 | 2608.21 | -3.36  |
| Hormone-sensitive lipase                      | P15304-2 | DNMAFFSSQGPGETARRLSNVFAGVREQ<br>AL                    | 1.12E-11 | 3254.58 | -3.58  |
| Fibrinogen alpha chain                        | P06399-2 | KQVTKSYKMADEAASEAHQEGDTRTTK                           | 3.27E-10 | 3009.45 | -0.42  |
| Breast carcinoma-amplified sequence 1 homolog | Q3ZB98-2 | GNPHGVSAGKDIVDSEERKQEVDTL                             | 5.55E-15 | 2679.32 | 5.42   |
| Alpha-internexin                              |          | SAGLSLKKEEEEEEEEEEGASKEVTKKTS<br>KVGESFEETLEETVVSTKK  | 4.56E-11 | 5330.63 | 1.17   |
| Alpha-crystallin B chain                      | P23928   | TSSLSSDGVLTVNGPRKQASGPERTIPITRE<br>EKPAVTAAPKK        | 2.29E-11 | 4373.37 | 0.35   |
| Alpha-crystallin B chain                      | P23928   | PFFPFHSPSRLFDQFFGEHLL                                 | 7.62E-20 | 2564.26 | -0.96  |
| Alpha-2B adrenergic receptor                  | P19328   | GVPTSAAKVPTLVSPSS                                     | 4.67E-10 | 1638.93 | 6.12   |
| Alpha-1-macroglobulin                         | Q63041   | SFSYKPRAPSAEVEMTAYVLLAYLTSASS<br>RPT                  | 4.68E-12 | 3492.76 | 0.47   |
| Aldose reductase                              | P07943   | IRFPIQRNLVVIPKSVTPARIAENFKVDFD                        | 3.24E-15 | 3514    | 0.84   |
| Alanine--tRNA ligase, cytoplasmic             | P50475   | FANAGMNQFKPIFL                                        | 1.25E-13 | 1596.81 | -1.29  |
| ADP-ribosylation factor-like protein 3        | P37996   | ILIIYVIDSADRKRFEETGQELTELEEEKL                        | 1.58E-10 | 3578.89 | 6.05   |
| Actin, cytoplasmic 2                          | F2Z3T1   | ALDFEQEMATAASSSSLEKSVELPDGQVIT<br>I                   | 5.94E-13 | 3329.59 | 2.05   |
| Ab2-427                                       | Q7TP39   | HPPIRSPSASSVGSRGSSGSSSKPA                             | 1.32E-12 | 2379.19 | 2.03   |
| Ab1-334                                       | Q7TP85   | VAHIFAIYVAQGTQVT                                      | 6.91E-07 | 1716.92 | -15.12 |

|                                                          |        |                                                       |          |         |       |
|----------------------------------------------------------|--------|-------------------------------------------------------|----------|---------|-------|
| 60S ribosomal protein L41                                | P62948 | MRAKWRKKRMRLKRRRKMQRSK                                | 2.36E-07 | 3454.1  | 1.37  |
| 60S ribosomal protein L39                                | P62893 | SSHKTFRIKRFLAKKQKQNRPIQWIRMK<br>TGNKIRYNSKRRHWRRTKLGL | 2.15E-15 | 6271.61 | -0.17 |
| 60S ribosomal protein L34                                | B2RZD4 | RRRLSYNTASNKTRLSRTPGNRIV                              | 4.19E-17 | 2815.57 | -2.05 |
| 60S acidic ribosomal protein P2                          | P02401 | AALGGNSNPSAKDIKKILDSVGEADDERL<br>NKVISEL              | 1.88E-08 | 3879.07 | 1.5   |
| 60S acidic ribosomal protein P1                          | P19944 | ALILHDDEVTVTEDKINALIKA                                | 1.05E-13 | 2420.32 | -0.98 |
| 40S ribosomal protein S30                                | P62864 | VNVVPTFGKKKGNANS                                      | 6.65E-09 | 1755.96 | -0.83 |
| 40S ribosomal protein S28                                | P62859 | DDTSRSIIRNVKGPVREGDVLTLLESEREA<br>RRLR                | 3.52E-15 | 3935.14 | -0.19 |
| 40S ribosomal protein S28                                | P62859 | SIIRNVKGPVREGDVLTLLESEREARRLR                         | 1.2E-15  | 3360.91 | -0.32 |
| 40S ribosomal protein S19                                | P17074 | PGVTVKDVNQEFVRLAAFLKKSGLK<br>VPEWVDTVKLAKHKELAPYDENW  | 7.01E-07 | 5819.16 | -0.8  |
| 40S ribosomal protein S19                                | P17074 | PGVTVKDVNQEFVRLAAFL                                   | 6.18E-09 | 2301.25 | 0.32  |
| 40S ribosomal protein S19                                | P17074 | PGVTVKDVNQEFVRLAA                                     | 1.83E-14 | 2041.1  | -0.03 |
| 40S ribosomal protein S16                                | P62250 | PSKGPLQSVQVF                                          | 6.8E-12  | 1285.7  | -0.75 |
| 3-oxoacyl-[acyl-carrier-protein] synthase, mitochondrial | G3V6R7 | LNYVPLEAQEWKTEGRCIGLTN                                | 6.19E-08 | 2533.27 | 1.99  |
| 28 kDa heat- and acid-stable phosphoprotein              | Q62785 | AIIRKQREEAARKKEEERKAKDDATLSGK<br>R                    | 3.28E-15 | 3509.95 | 0.18  |
| 10 kDa heat shock protein, mitochondrial                 | P26772 | KVGDKVLPEYGGTKVVLDDKDYFLFRD<br>GDILGKYVD              | 5.29E-10 | 4189.2  | -0.59 |

**Table S3.** Details on the mass spectral calibrations using internal standards for the MALDI MS regional release profiling experiments.

1) Calibration for DR region release mass spectra

Algorithm: ReferenceMassAssignment

Mode: ToF Cubic Enhanced

Result: OK

Calibration Quality : 175.914

Assigned Calibrants: 9

Calibrant 1:

Calibrant Name: Na+

Calibrant Mass: 22.990 Da

Mass After Calibration: 22.996 Da

Mass Error: 271.180 ppm

Calibrant 2:

Calibrant Name: K+

Calibrant Mass: 38.964 Da

Mass After Calibration: 38.949 Da

Mass Error: 390.232 ppm

Calibrant 3:

Calibrant Name: DHB\_[M+H]+\_mono

Calibrant Mass: 155.034 Da

Mass After Calibration: 155.047 Da

Mass Error: 82.129 ppm

Calibrant 4:

Calibrant Name: DHB + Na

Calibrant Mass: 177.016 Da

Mass After Calibration: 177.020 Da

Mass Error: 22.481 ppm

Calibrant 5:

Calibrant Name: DHB + K

Calibrant Mass: 192.990 Da

Mass After Calibration: 193.007 Da

Mass Error: 86.861 ppm

Calibrant 6:

Calibrant Name: DHB ion +

Calibrant Mass: 439.200 Da

Mass After Calibration: 439.165 Da

Mass Error: 80.467 ppm

Calibrant 7:

Calibrant Name: Neurofilament 3, medium Acyl (SYTLDSLGNPSAYRRVTETR)

Calibrant Mass: 2328.158 Da

Mass After Calibration: 2328.201 Da

Mass Error: 18.289 ppm

Calibrant 8:



Calibrant Name: Neurofilament 3, medium (VEAPKLVQHKFVEEIIIEETKVEDEK).

Calibrant Mass: 3094.667 Da

Mass After Calibration: 3094.630 Da

Mass Error: 11.839 ppm

Calibrant 9:

Calibrant Name: Thymosin beta 4 acetate + [Mono]

Calibrant Mass: 4961.486 Da

Mass After Calibration: 4961.491 Da

Mass Error: 0.987 ppm

## 2) Calibration for DRG region release mass spectra

Algorithm: ReferenceMassAssignment

Mode: ToF Cubic Enhanced

Result: OK

Calibration Quality : 140.633

Assigned Calibrants: 9

Calibrant 1:

Calibrant Name: Na+

Calibrant Mass: 22.990 Da

Mass After Calibration: 22.995 Da

Mass Error: 210.057 ppm

Calibrant 2:

Calibrant Name: K+

Calibrant Mass: 38.964 Da

Mass After Calibration: 38.952 Da

Mass Error: 309.635 ppm

Calibrant 3:

Calibrant Name: DHB\_[M+H]+\_mono

Calibrant Mass: 155.034 Da

Mass After Calibration: 155.051 Da

Mass Error: 105.786 ppm

Calibrant 4:

Calibrant Name: DHB + Na

Calibrant Mass: 177.016 Da

Mass After Calibration: 177.025 Da

Mass Error: 49.812 ppm

Calibrant 5:

Calibrant Name: DHB ion +

Calibrant Mass: 439.200 Da

Mass After Calibration: 439.172 Da

Mass Error: 63.931 ppm

Calibrant 6:

Calibrant Name: Neurofilament 3, medium Acyl (SYTLDSLGNPSAYRRVTETR)

Calibrant Mass: 2328.158 Da

Mass After Calibration: 2328.176 Da

Mass Error: 7.604 ppm

Calibrant 7:

Calibrant Name: Vimentin

Calibrant Mass: 2335.160 Da

Mass After Calibration: 2335.191 Da

Mass Error: 13.326 ppm

Calibrant 8:

Calibrant Name: Neurofilament 3, medium (VEAPKLVQHKFVEEIIIEETKVEDEK).

Calibrant Mass: 3094.667 Da

Mass After Calibration: 3094.620 Da

Mass Error: 15.030 ppm

Calibrant 9:

Calibrant Name: Thymosin beta 4 acetate + [Mono]

Calibrant Mass: 4961.486 Da

Mass After Calibration: 4961.494 Da

Mass Error: 1.570 ppm

### 3) Calibration for spinal nerve region release mass spectra

Algorithm: ReferenceMassAssignment

Mode: Tof Cubic Enhanced

Quality After Calibration: 138.039

Assigned Calibrants: 12

Calibrant 1:

Calibrant Name: Na<sup>+</sup>

Calibrant Mass: 22.990 Da

Mass After Calibration: 22.995 Da

Mass Error: 234.919 ppm

Calibrant 2:

Calibrant Name: K<sup>+</sup>

Calibrant Mass: 38.964 Da

Mass After Calibration: 38.950 Da

Mass Error: 342.179 ppm

Calibrant 3:

Calibrant Name: DHB\_[M+H]<sup>+</sup>\_mono

Calibrant Mass: 155.034 Da

Mass After Calibration: 155.051 Da

Mass Error: 103.993 ppm

Calibrant 4:

Calibrant Name: DHB + Na

Calibrant Mass: 177.016 Da

Mass After Calibration: 177.013 Da

Mass Error: 16.599 ppm

Calibrant 5:

Calibrant Name: DHB + K

Calibrant Mass: 192.990 Da

Mass After Calibration: 193.008 Da

Mass Error: 94.648 ppm

Calibrant 6:

Calibrant Name: 9-AA [M+H]<sup>+</sup>

Calibrant Mass: 195.092 Da

Mass After Calibration: 195.105 Da

Mass Error: 70.810 ppm

Calibrant 7:

Calibrant Name: DHB -H + 2Na

Calibrant Mass: 198.998 Da

Mass After Calibration: 198.982 Da

Mass Error: 81.612 ppm

Calibrant 8:

Calibrant Name: DHB ion +

Calibrant Mass: 439.200 Da

Mass After Calibration: 439.168 Da

Mass Error: 72.100 ppm

Calibrant 9:

Calibrant Name: Neurofilament 3, medium Acyl (SYTLDSLGNPSAYRRVTETR)

Calibrant Mass: 2328.158 Da

Mass After Calibration: 2328.185 Da

Mass Error: 11.455 ppm

Calibrant 10:

Calibrant Name: Vimentin

Calibrant Mass: 2335.160 Da

Mass After Calibration: 2335.181 Da

Mass Error: 8.825 ppm

Calibrant 11:

Calibrant Name: Neurofilament 3, medium (VEAPKLKVQHKFVEEIIIEETKVEDEK).

Calibrant Mass: 3094.667 Da

Mass After Calibration: 3094.623 Da

Mass Error: 14.056 ppm

Calibrant 12:

Calibrant Name: Thymosin beta 4 acetate + [Mono]

Calibrant Mass: 4961.486 Da

Mass After Calibration: 4961.493 Da

Mass Error: 1.370 ppm

#### 4) Calibration for VR region release mass spectra

Algorithm: ReferenceMassAssignment

Mode: Tof Cubic Enhanced

Result: OK

Calibration Quality : 48.924

Assigned Calibrants: 10

Calibrant 1:

Calibrant Name: Na<sup>+</sup>

Calibrant Mass: 22.990 Da  
Mass After Calibration: 22.991 Da  
Mass Error: 56.875 ppm

Calibrant 2:  
Calibrant Name: K+  
Calibrant Mass: 38.964 Da  
Mass After Calibration: 38.960 Da  
Mass Error: 86.371 ppm

Calibrant 3:  
Calibrant Name: DHB\_[M+H]+\_mono  
Calibrant Mass: 155.034 Da  
Mass After Calibration: 155.046 Da  
Mass Error: 75.865 ppm

Calibrant 4:  
Calibrant Name: DHB + Na  
Calibrant Mass: 177.016 Da  
Mass After Calibration: 177.005 Da  
Mass Error: 61.098 ppm

Calibrant 5:  
Calibrant Name: DHB + K  
Calibrant Mass: 192.990 Da  
Mass After Calibration: 192.996 Da  
Mass Error: 30.433 ppm

Calibrant 6:  
Calibrant Name: DHB ion +  
Calibrant Mass: 439.200 Da  
Mass After Calibration: 439.192 Da  
Mass Error: 18.346 ppm

Calibrant 7:  
Calibrant Name: Neurofilament 3, medium Acyl (SYTLDSLGNPSAYRRVTETR)  
Calibrant Mass: 2328.158 Da  
Mass After Calibration: 2328.177 Da  
Mass Error: 7.789 ppm

Calibrant 8:  
Calibrant Name: Vimentin  
Calibrant Mass: 2335.160 Da  
Mass After Calibration: 2335.160 Da  
Mass Error: 0.017 ppm

Calibrant 9:  
Calibrant Name: Neurofilament 3, medium (VEAPKLVQHKFVEEIIIEETKVEDEK).  
Calibrant Mass: 3094.667 Da  
Mass After Calibration: 3094.649 Da  
Mass Error: 5.901 ppm

Calibrant 10:  
Calibrant Name: Thymosin beta 4 acetate + [Mono]

Calibrant Mass: 4961.486 Da  
Mass After Calibration: 4961.490 Da  
Mass Error: 0.683 ppm

**Table S4.** Peaks detected in releasates from different regions, with their identities assigned via matching the MALDI MS and FT MS data sets and information on their protein of origin. For several cases, an ~1 and 2 Da difference between the molecular mass of the analyte and predicted molecule appears because the intensity was low and only the most intense monoisotopic peaks were observed (e.g.,  $m/z$  4977.5 for thymosin beta 4 related peptide). Shading is used to alternate between groups of peaks of the same nominal mass values.

| Origin of data or information | Protein            | [M+H] <sup>+</sup><br>(calculated or observed) | Protein Name              |
|-------------------------------|--------------------|------------------------------------------------|---------------------------|
| Dorsal root                   |                    | 616.30                                         |                           |
| Spinal nerve                  |                    | 616.30                                         |                           |
| DRG                           |                    | 616.31                                         |                           |
| Ventral root                  |                    | 624.28                                         |                           |
| Ventral root                  |                    | 626.29                                         |                           |
| Ventral root                  |                    | 642.30                                         |                           |
| Dorsal root                   |                    | 643.17                                         |                           |
| Ventral root                  |                    | 643.30                                         |                           |
| Dorsal root                   |                    | 709.33                                         |                           |
| Ventral root                  |                    | 732.30                                         |                           |
| Spinal nerve                  |                    | 733.19                                         |                           |
| Dorsal root                   |                    | 733.20                                         |                           |
| Spinal nerve                  |                    | 734.20                                         |                           |
| Dorsal root                   |                    | 734.20                                         |                           |
| Ventral root                  |                    | 778.34                                         |                           |
| Ventral root                  |                    | 796.28                                         |                           |
| Spinal nerve                  |                    | 815.62                                         |                           |
| Spinal nerve                  |                    | 869.18                                         |                           |
| DRG                           |                    | 869.19                                         |                           |
| Dorsal root                   |                    | 869.21                                         |                           |
| Ventral root                  |                    | 871.29                                         |                           |
| ProSight                      | P02091 - HBB1_RAT  | 871.49                                         | Hemoglobin subunit beta-1 |
| Spinal nerve                  |                    | 875.21                                         |                           |
| Dorsal root                   |                    | 881.39                                         |                           |
| Ventral root                  |                    | 887.30                                         |                           |
| Spinal nerve                  |                    | 891.18                                         |                           |
| Dorsal root                   |                    | 907.35                                         |                           |
| Spinal nerve                  |                    | 907.36                                         |                           |
| PEAKS                         | sp P31000 VIME_RAT | 907.46                                         | Vimentin                  |
| Ventral root                  |                    | 912.36                                         |                           |
| PEAKS                         | sp P02091 HBB1_RAT | 912.47                                         | Hemoglobin subunit beta-1 |
| Ventral root                  |                    | 962.34                                         |                           |
| Spinal nerve                  |                    | 1053.21                                        |                           |
| Ventral root                  |                    | 1053.37                                        |                           |

|              |                      |         |                                                              |
|--------------|----------------------|---------|--------------------------------------------------------------|
| DRG          |                      | 1066.24 |                                                              |
| PEAKS        | sp P19527 NFL_RAT    | 1085.53 | Neurofilament light polypeptide                              |
| Dorsal root  |                      | 1085.70 |                                                              |
| PEAKS        | sp P02688 MBP_RAT    | 1098.57 | Myelin basic protein                                         |
| Dorsal root  |                      | 1098.73 |                                                              |
| DRG          |                      | 1103.69 |                                                              |
| Dorsal root  |                      | 1108.74 |                                                              |
| PEAKS        | sp P07150 ANXA1_RAT  | 1165.58 | Annexin A1                                                   |
| DRG          |                      | 1165.82 |                                                              |
| DR           |                      | 1165.85 |                                                              |
| Ventral root |                      | 1231.47 |                                                              |
| PEAKS        | sp P31000 VIME_RAT   | 1231.67 | Vimentin                                                     |
| Dorsal root  |                      | 1349.48 |                                                              |
| PEAKS        | sp P19527 NFL_RAT    | 1370.68 | Neurofilament light polypeptide                              |
| Dorsal root  |                      | 1370.83 |                                                              |
| PEAKS        | sp P19527 NFL_RAT    | 1379.77 | Neurofilament light polypeptide                              |
| PEAKS        | sp P31000 VIME_RAT   | 1379.79 | Vimentin                                                     |
| Dorsal root  |                      | 1379.87 |                                                              |
| Ventral root |                      | 1397.54 |                                                              |
| PEAKS        | tr B1H216 B1H216_RAT | 1450.81 | Hemoglobin alpha, adult chain 2                              |
| Dorsal root  |                      | 1450.87 |                                                              |
| PEAKS        | sp P62329 TYB4_RAT   | 1451.66 | Thymosin beta-4                                              |
| Ventral root |                      | 1488.57 |                                                              |
| Dorsal root  |                      | 1508.92 |                                                              |
| PEAKS        | sp P02770 ALBU_RAT   | 1556.74 | Serum albumin                                                |
| PEAKS        | sp P62859 RS28_RAT   | 1556.85 | 40S ribosomal protein S28                                    |
| Dorsal root  |                      | 1556.90 |                                                              |
| PEAKS        | sp P20788 UCRI_RAT   | 1655.94 | Cytochrome b-c1 complex subunit Rieske, mitochondrial        |
| Dorsal root  |                      | 1655.98 |                                                              |
| Ventral root |                      | 1671.83 |                                                              |
| PEAKS        | sp P02688 MBP_RAT    | 1671.86 | Myelin basic protein                                         |
| DRG          |                      | 1671.95 |                                                              |
| Dorsal root  |                      | 1671.97 |                                                              |
| ProSight     | P12839 - NFM_RAT     | 1700.99 | Neurofilament 3, medium                                      |
| DRG          |                      | 1701.01 |                                                              |
| Dorsal root  |                      | 1701.07 |                                                              |
| PEAKS        | sp P19527 NFL_RAT    | 1701.81 | Neurofilament light polypeptide                              |
| Spinal nerve |                      | 1701.97 |                                                              |
| Ventral root |                      | 1703.85 |                                                              |
| ProSight     | P12839 - NFM_RAT     | 1703.91 | Neurofilament 3, medium                                      |
| PEAKS        | tr G3V7S2 G3V7S2_RAT | 1703.91 | Neurofilament, medium. Uncharacterized protein. Gene - Nefm. |
| Dorsal root  |                      | 1704.00 |                                                              |

|              |                      |         |                                                              |
|--------------|----------------------|---------|--------------------------------------------------------------|
| ProSight     | P12839 - NFM_RAT     | 1741.84 | Neurofilament 3, medium                                      |
| PEAKS        | tr G3V7S2 G3V7S2_RAT | 1741.84 | Neurofilament, medium. Uncharacterized protein. Gene - Nefm. |
| DRG          |                      | 1741.94 |                                                              |
| Spinal nerve |                      | 1741.95 |                                                              |
| PEAKS        | sp P0CC09 H2A2A_RAT  | 1741.97 | Histone H2A type 2-A                                         |
| Dorsal root  |                      | 1741.98 |                                                              |
| PEAKS        | sp P02688 MBP_RAT    | 1762.88 | Myelin basic protein                                         |
| DRG          |                      | 1762.94 |                                                              |
| PEAKS        | sp P19527 NFL_RAT    | 1763.85 | Neurofilament light polypeptide                              |
| PEAKS        | sp P31000 VIME_RAT   | 1763.94 | Vimentin                                                     |
| Dorsal root  |                      | 1763.98 |                                                              |
| Ventral root |                      | 1784.93 |                                                              |
| ProSight     | P02688 - MBP_RAT     | 1784.94 | Myelin basic protein S (Alt Splice Form 3)                   |
| ProSight     | P02688 - MBP_RAT     | 1784.97 | Myelin basic protein S (Alt Splice Form 4)                   |
| ProSight     | Q9QXU9 - PCSK1_RAT   | 1784.97 | Peptide (Little SAAS) [42-59] in ProSAAS                     |
| Spinal nerve |                      | 1784.99 |                                                              |
| DRG          |                      | 1785.00 |                                                              |
| Dorsal root  |                      | 1785.04 |                                                              |
| PEAKS        | sp Q5M7W5 MAP4_RAT   | 1794.82 | Microtubule-associated protein 4                             |
| Dorsal root  |                      | 1795.00 |                                                              |
| Spinal nerve |                      | 1812.98 |                                                              |
| Dorsal root  |                      | 1813.01 |                                                              |
| ProSight     | P12839 - NFM_RAT     | 1836.90 | Neurofilament 3, medium                                      |
| DRG          |                      | 1836.99 |                                                              |
| Spinal nerve |                      | 1836.99 |                                                              |
| Dorsal root  |                      | 1837.02 |                                                              |
| PEAKS        | sp P19527 NFL_RAT    | 1848.86 | Neurofilament light polypeptide                              |
| DRG          |                      | 1848.99 |                                                              |
| PEAKS        | sp P02688 MBP_RAT    | 1853.01 | Myelin basic protein                                         |
| DRG          |                      | 1853.04 |                                                              |
| Spinal nerve |                      | 1853.05 |                                                              |
| Dorsal root  |                      | 1853.08 |                                                              |
| PEAKS        | sp P02688 MBP_RAT    | 1855.98 | Myelin basic protein                                         |
| Dorsal root  |                      | 1856.07 |                                                              |
| Ventral root |                      | 1911.95 |                                                              |
| PEAKS        | sp P02688 MBP_RAT    | 1911.96 | Myelin basic protein                                         |
| Ventral root |                      | 1913.96 |                                                              |
| PEAKS        | tr D4A115 D4A115_RAT | 1913.96 | Protein Col6a3                                               |
| Ventral root |                      | 1939.05 |                                                              |
| Spinal nerve |                      | 1939.09 |                                                              |
| PEAKS        | tr G3V7S2 G3V7S2_RAT | 1939.10 | Neurofilament, medium. Uncharacterized protein. Gene - Nefm. |
| DRG          |                      | 1939.12 |                                                              |



|              |                      |         |                                                                 |
|--------------|----------------------|---------|-----------------------------------------------------------------|
| Dorsal root  |                      | 1939.15 |                                                                 |
| Ventral root |                      | 1957.00 |                                                                 |
| PEAKS        | sp P02688 MBP_RAT    | 1957.03 | Myelin basic protein                                            |
| PEAKS        | sp P13668 STMN1_RAT  | 1959.01 | Stathmin                                                        |
| DRG          |                      | 1959.05 |                                                                 |
| Spinal nerve |                      | 1959.05 |                                                                 |
| Dorsal root  |                      | 1959.09 |                                                                 |
| PEAKS        | sp P02688 MBP_RAT    | 1962.99 | Myelin basic protein                                            |
| Spinal nerve |                      | 1963.04 |                                                                 |
| DRG          |                      | 1963.05 |                                                                 |
| Dorsal root  |                      | 1963.05 |                                                                 |
| PEAKS        | sp P19527 NFL_RAT    | 1985.92 | Neurofilament light polypeptide                                 |
| DRG          |                      | 1986.03 |                                                                 |
| Dorsal root  |                      | 1986.07 |                                                                 |
| PEAKS        | sp P19527 NFL_RAT    | 1993.94 | Neurofilament light polypeptide                                 |
| Ventral root |                      | 1993.97 |                                                                 |
| PEAKS        | sp P02688 MBP_RAT    | 1994.04 | Myelin basic protein                                            |
| PEAKS        | sp P19527 NFL_RAT    | 2008.93 | Neurofilament light polypeptide                                 |
| PEAKS        | sp P31000 VIME_RAT   | 2008.93 | Vimentin                                                        |
| Ventral root |                      | 2008.94 |                                                                 |
| DRG          |                      | 2009.01 |                                                                 |
| Spinal nerve |                      | 2009.02 |                                                                 |
| Dorsal root  |                      | 2009.05 |                                                                 |
| PEAKS        | sp P02688 MBP_RAT    | 2020.01 | Myelin basic protein                                            |
| Spinal nerve |                      | 2020.07 |                                                                 |
| DRG          |                      | 2020.08 |                                                                 |
| Dorsal root  |                      | 2020.10 |                                                                 |
| PEAKS        | sp P02688 MBP_RAT    | 2028.07 | Myelin basic protein                                            |
| Ventral root |                      | 2028.08 |                                                                 |
| Spinal nerve |                      | 2028.08 |                                                                 |
| Dorsal root  |                      | 2028.12 |                                                                 |
| DRG          |                      | 2062.09 |                                                                 |
| PEAKS        | sp P19527 NFL_RAT    | 2102.10 | Neurofilament light polypeptide                                 |
| Dorsal root  |                      | 2102.14 |                                                                 |
| PEAKS        | sp P02688 MBP_RAT    | 2108.03 | Myelin basic protein                                            |
| Ventral root |                      | 2108.06 |                                                                 |
| PEAKS        | sp P02688 MBP_RAT    | 2110.06 | Myelin basic protein                                            |
| DRG          |                      | 2110.11 |                                                                 |
| Spinal nerve |                      | 2110.11 |                                                                 |
| Dorsal root  |                      | 2110.13 |                                                                 |
| PEAKS        | tr G3V7S2 G3V7S2_RAT | 2140.99 | Neurofilament, medium. Uncharacterized protein.<br>Gene - Nefm. |
| Ventral root |                      | 2141.01 |                                                                 |
| DRG          |                      | 2141.10 |                                                                 |

|              |                     |         |                                            |
|--------------|---------------------|---------|--------------------------------------------|
| Spinal nerve |                     | 2141.11 |                                            |
| Dorsal root  |                     | 2141.14 |                                            |
| ProSight     | P19527              | 2149.99 | Neurofilament light polypeptide            |
| PEAKS        | sp P10111 PPIA_RAT  | 2150.05 | Peptidyl-prolyl cis-trans isomerase A      |
| DRG          |                     | 2150.10 |                                            |
| Dorsal root  |                     | 2150.14 |                                            |
| Ventral root |                     | 2158.07 |                                            |
| PEAKS        | sp P19527 NFL_RAT   | 2158.10 | Neurofilament light polypeptide            |
| PEAKS        | sp P69897 TBB5_RAT  | 2158.11 | Tubulin beta-5 chain                       |
| DRG          |                     | 2158.12 |                                            |
| Dorsal root  |                     | 2158.16 |                                            |
| PEAKS        | sp P02688 MBP_RAT   | 2167.08 | Myelin basic protein                       |
| Spinal nerve |                     | 2167.13 |                                            |
| DRG          |                     | 2167.13 |                                            |
| Dorsal root  |                     | 2167.15 |                                            |
| PEAKS        | sp P02091 HBB1_RAT  | 2167.17 | Hemoglobin subunit beta-1                  |
| PEAKS        | sp P19527 NFL_RAT   | 2174.00 | Neurofilament light polypeptide            |
| DRG          |                     | 2174.05 |                                            |
| Dorsal root  |                     | 2174.11 |                                            |
| PEAKS        | sp P19527 NFL_RAT   | 2189.13 | Neurofilament light polypeptide            |
| Dorsal root  |                     | 2190.16 |                                            |
| Ventral root |                     | 2202.15 |                                            |
| PEAKS        | sp P06907 MYP0_RAT  | 2202.16 | Myelin protein P0                          |
| ProSight     | P01946 - HBA_RAT    | 2202.16 | Hemoglobin subunit alpha-1/2               |
| Dorsal root  |                     | 2202.18 |                                            |
| Ventral root |                     | 2210.04 |                                            |
| PEAKS        | sp P61972 NTF2_RAT  | 2210.05 | Nuclear transport factor 2                 |
| DRG          |                     | 2210.08 |                                            |
| Spinal nerve |                     | 2210.09 |                                            |
| Dorsal root  |                     | 2210.12 |                                            |
| PEAKS        | sp P05942 S10A4_RAT | 2217.15 | Protein S100-A4                            |
| Dorsal root  |                     | 2217.22 |                                            |
| PEAKS        | sp P31000 VIME_RAT  | 2257.11 | Vimentin                                   |
| PEAKS        | sp P02688 MBP_RAT   | 2257.13 | Myelin basic protein                       |
| DRG          |                     | 2257.16 |                                            |
| Spinal nerve |                     | 2257.16 |                                            |
| Dorsal root  |                     | 2263.25 |                                            |
| PEAKS        | sp P06907 MYP0_RAT  | 2263.27 | Myelin protein P0                          |
| PEAKS        | sp P19527 NFL_RAT   | 2310.09 | Neurofilament light polypeptide            |
| Ventral root |                     | 2310.10 |                                            |
| DRG          |                     | 2310.15 |                                            |
| ProSight     | P02688 - MBP_RAT    | 2310.16 | Myelin basic protein S (Alt Splice Form 3) |
| Ventral root |                     | 2313.15 |                                            |

|              |                      |         |                                                              |
|--------------|----------------------|---------|--------------------------------------------------------------|
| PEAKS        | sp P11762 LEG1_RAT   | 2313.20 | Galectin-1                                                   |
| ProSight     | P12839 - NFM_RAT     | 2328.15 | Neurofilament 3, medium                                      |
| PEAKS        | tr G3V7S2 G3V7S2_RAT | 2328.15 | Neurofilament, medium. Uncharacterized protein. Gene - Nefm. |
| DRG          |                      | 2328.18 |                                                              |
| Ventral root |                      | 2328.18 |                                                              |
| Spinal nerve |                      | 2328.19 |                                                              |
| DR           |                      | 2328.20 |                                                              |
| PEAKS        | tr G3V7S2 G3V7S2_RAT | 2329.18 | Neurofilament, medium. Uncharacterized protein. Gene - Nefm. |
| DRG          |                      | 2329.19 |                                                              |
| ProSight     | P12839 - NFM_RAT     | 2329.19 | Neurofilament 3, medium                                      |
| PEAKS        | sp P31000 VIME_RAT   | 2335.15 | Vimentin                                                     |
| Ventral root |                      | 2335.16 |                                                              |
| Spinal nerve |                      | 2335.18 |                                                              |
| DRG          |                      | 2335.19 |                                                              |
| Dorsal root  |                      | 2335.21 |                                                              |
| DRG          |                      | 2336.14 |                                                              |
| ProSight     | sp P19527 NFL_RAT    | 2337.07 | Neurofilament light polypeptide                              |
| Dorsal root  |                      | 2337.17 |                                                              |
| PEAKS        | sp Q03344 ATIF1_RAT  | 2351.18 | ATPase inhibitor, mitochondrial                              |
| DRG          |                      | 2351.18 |                                                              |
| Spinal nerve |                      | 2358.21 |                                                              |
| PEAKS        | sp P19527 NFL_RAT    | 2358.21 | Neurofilament light polypeptide                              |
| Ventral root |                      | 2358.23 |                                                              |
| DRG          |                      | 2358.23 |                                                              |
| Dorsal root  |                      | 2358.24 |                                                              |
| Spinal nerve |                      | 2373.20 |                                                              |
| PEAKS        | sp P19527 NFL_RAT    | 2374.21 | Neurofilament light polypeptide                              |
| DRG          |                      | 2374.22 |                                                              |
| Dorsal root  |                      | 2374.24 |                                                              |
| PEAKS        | sp P19527 NFL_RAT    | 2377.12 | Neurofilament light polypeptide                              |
| DRG          |                      | 2377.18 |                                                              |
| Dorsal root  |                      | 2377.21 |                                                              |
| PEAKS        | sp P31000 VIME_RAT   | 2391.15 | Vimentin                                                     |
| Spinal nerve |                      | 2391.19 |                                                              |
| Ventral root |                      | 2406.24 |                                                              |
| PEAKS        | sp P06907 MYP0_RAT   | 2406.29 | Myelin protein P0                                            |
| PEAKS        | tr G3V7S2 G3V7S2_RAT | 2415.18 | Neurofilament, medium. Uncharacterized protein. Gene - Nefm. |
| Ventral root |                      | 2415.20 |                                                              |
| DRG          |                      | 2415.22 |                                                              |
| PEAKS        | sp P19527 NFL_RAT    | 2415.24 | Neurofilament light polypeptide                              |
| PEAKS        | tr F1LRZ7 F1LRZ7_RAT | 2425.19 | Neurofilament heavy polypeptide                              |
| Ventral root |                      | 2425.19 |                                                              |

|              |                      |         |                                                                 |
|--------------|----------------------|---------|-----------------------------------------------------------------|
| PEAKS        | sp P19527 NFL_RAT    | 2438.12 | Neurofilament light polypeptide                                 |
| Ventral root |                      | 2438.17 |                                                                 |
| Spinal nerve |                      | 2438.21 |                                                                 |
| DRG          |                      | 2447.27 |                                                                 |
| Spinal nerve |                      | 2447.27 |                                                                 |
| Dorsal root  |                      | 2447.32 |                                                                 |
| PEAKS        | sp P68370 TBA1A_RAT  | 2447.33 | Tubulin alpha-1A chain                                          |
| Ventral root |                      | 2448.28 |                                                                 |
| PEAKS        | sp P62902 RL31_RAT   | 2448.36 | 60S ribosomal protein L31                                       |
| Dorsal root  |                      | 2457.26 |                                                                 |
| PEAKS        | tr G3V7S2 G3V7S2_RAT | 2457.28 | Neurofilament, medium. Uncharacterized protein.<br>Gene - Nefm. |
| ProSight     | P12839 - NFM_RAT     | 2457.28 | Neurofilament 3, medium                                         |
| PEAKS        | sp P04631 S100B_RAT  | 2464.21 | Protein S100-B                                                  |
| Spinal nerve |                      | 2464.29 |                                                                 |
| Ventral root |                      | 2470.29 |                                                                 |
| PEAKS        | sp P02688 MBP_RAT    | 2470.37 | Myelin basic protein                                            |
| Dorsal root  |                      | 2480.35 |                                                                 |
| PEAKS        | tr G3V8L9 G3V8L9_RAT | 2480.48 | Neurofilament, medium. Uncharacterized protein.<br>Gene - Nefm. |
| PEAKS        | sp Q6PDU1 SRSF2_RAT  | 2481.19 | Serine/arginine-rich splicing factor 2                          |
| Ventral root |                      | 2481.25 |                                                                 |
| DRG          |                      | 2499.25 |                                                                 |
| Ventral root |                      | 2499.26 |                                                                 |
| Dorsal root  |                      | 2499.26 |                                                                 |
| Spinal nerve |                      | 2499.26 |                                                                 |
| DRG          |                      | 2501.25 |                                                                 |
| Dorsal root  |                      | 2501.27 |                                                                 |
| DRG          |                      | 2512.27 |                                                                 |
| Spinal nerve |                      | 2512.28 |                                                                 |
| PEAKS        | sp P02688 MBP_RAT    | 2512.30 | Myelin basic protein                                            |
| Ventral root |                      | 2513.25 |                                                                 |
| Dorsal root  |                      | 2513.30 |                                                                 |
| Ventral root |                      | 2515.25 |                                                                 |
| Ventral root |                      | 2534.28 |                                                                 |
| Dorsal root  |                      | 2534.36 |                                                                 |
| Ventral root |                      | 2539.22 |                                                                 |
| Ventral root |                      | 2570.32 |                                                                 |
| Spinal nerve |                      | 2570.33 |                                                                 |
| DRG          |                      | 2570.33 |                                                                 |
| Dorsal root  |                      | 2570.35 |                                                                 |
| ProSight     | P12839 - NFM_RAT     | 2570.36 | Neurofilament 3, medium                                         |
| Dorsal root  |                      | 2594.38 |                                                                 |
| PEAKS        | sp P02688 MBP_RAT    | 2599.27 | Myelin basic protein                                            |

|              |                      |         |                                                              |
|--------------|----------------------|---------|--------------------------------------------------------------|
| Ventral root |                      | 2599.29 |                                                              |
| ProSight     | P12839 - NFM_RAT     | 2606.22 | Neurofilament 3, medium                                      |
| Ventral root |                      | 2606.27 |                                                              |
| PEAKS        | tr F1LRZ7 F1LRZ7_RAT | 2606.36 | Neurofilament heavy polypeptide                              |
| DRG          |                      | 2618.30 |                                                              |
| Dorsal root  |                      | 2618.33 |                                                              |
| Ventral root |                      | 2618.33 |                                                              |
| PEAKS        | tr G3V7S2 G3V7S2_RAT | 2618.35 | Neurofilament, medium. Uncharacterized protein. Gene - Nefm. |
| ProSight     | P12839 - NFM_RAT     | 2618.35 | Neurofilament 3, medium                                      |
| PEAKS        | tr F1M7P4 F1M7P4_RAT | 2628.30 | Peripherin                                                   |
| Ventral root |                      | 2629.30 |                                                              |
| Ventral root |                      | 2643.38 |                                                              |
| PEAKS        | sp P06907 MYP0_RAT   | 2643.46 | Myelin protein P0                                            |
| DRG          |                      | 2663.32 |                                                              |
| PEAKS        | sp Q6JE36 NDRG1_RAT  | 2663.38 | Protein NDRG1                                                |
| PEAKS        | sp P31000 VIME_RAT   | 2664.28 | Vimentin                                                     |
| Dorsal root  |                      | 2664.33 |                                                              |
| DRG          |                      | 2665.31 |                                                              |
| Ventral root |                      | 2667.35 |                                                              |
| PEAKS        | sp P02688 MBP_RAT    | 2670.31 | Myelin basic protein                                         |
| Ventral root |                      | 2670.35 |                                                              |
| Ventral root |                      | 2675.34 |                                                              |
| PEAKS        | sp P02688 MBP_RAT    | 2686.30 | Myelin basic protein                                         |
| Ventral root |                      | 2687.33 |                                                              |
| DRG          |                      | 2702.25 |                                                              |
| PEAKS        | sp P19527 NFL_RAT    | 2702.26 | Neurofilament light polypeptide                              |
| Spinal nerve |                      | 2702.27 |                                                              |
| Dorsal root  |                      | 2702.28 |                                                              |
| Ventral root |                      | 2702.31 |                                                              |
| Dorsal root  |                      | 2711.36 |                                                              |
| DRG          |                      | 2711.37 |                                                              |
| Ventral root |                      | 2711.38 |                                                              |
| PEAKS        | sp P02688 MBP_RAT    | 2711.42 | Myelin basic protein                                         |
| PEAKS        | tr F1LRZ7 F1LRZ7_RAT | 2721.35 | Neurofilament heavy polypeptide                              |
| Ventral root |                      | 2723.38 |                                                              |
| PEAKS        | sp P06907 MYP0_RAT   | 2723.42 | Myelin protein P0                                            |
| PEAKS        | sp P31000 VIME_RAT   | 2723.46 | Vimentin                                                     |
| DRG          |                      | 2724.31 |                                                              |
| PEAKS        | tr Q8R4A2 Q8R4A2_RAT | 2724.32 | Caveolin 1                                                   |
| Dorsal root  |                      | 2724.36 |                                                              |
| Ventral root |                      | 2742.34 |                                                              |
| DRG          |                      | 2746.37 |                                                              |
| Dorsal root  |                      | 2746.41 |                                                              |

|              |                      |         |                                                                 |
|--------------|----------------------|---------|-----------------------------------------------------------------|
| ProSight     | P12839 - NFM_RAT     | 2746.44 | Neurofilament 3, medium                                         |
| PEAKS        | tr G3V7S2 G3V7S2_RAT | 2746.44 | Neurofilament, medium. Uncharacterized protein.<br>Gene - Nefm. |
| Spinal nerve |                      | 2763.34 |                                                                 |
| Dorsal root  |                      | 2763.35 |                                                                 |
| DRG          |                      | 2763.35 |                                                                 |
| PEAKS        | sp P19527 NFL_RAT    | 2763.36 | Neurofilament light polypeptide                                 |
| PEAKS        | sp P31000 VIME_RAT   | 2763.41 | Vimentin                                                        |
| Ventral root |                      | 2764.37 |                                                                 |
| DRG          |                      | 2777.34 |                                                                 |
| Dorsal root  |                      | 2777.35 |                                                                 |
| Spinal nerve |                      | 2777.35 |                                                                 |
| PEAKS        | sp P31000 VIME_RAT   | 2777.36 | Vimentin                                                        |
| Ventral root |                      | 2777.39 |                                                                 |
| Ventral root |                      | 2780.40 |                                                                 |
| PEAKS        | sp P62630 EF1A1_RAT  | 2780.68 | Elongation factor 1-alpha 1                                     |
| PEAKS        | sp P19527 NFL_RAT    | 2792.32 | Neurofilament light polypeptide                                 |
| DRG          |                      | 2798.36 |                                                                 |
| Spinal nerve |                      | 2798.37 |                                                                 |
| Dorsal root  |                      | 2799.38 |                                                                 |
| PEAKS        | sp P02688 MBP_RAT    | 2826.41 | Myelin basic protein                                            |
| Ventral root |                      | 2826.43 |                                                                 |
| PEAKS        | sp P62329 TYB4_RAT   | 2829.40 | Thymosin beta-4                                                 |
| Dorsal root  |                      | 2830.39 |                                                                 |
| DRG          |                      | 2865.32 |                                                                 |
| PEAKS        | sp P19527 NFL_RAT    | 2865.32 | Neurofilament light polypeptide                                 |
| Spinal nerve |                      | 2865.35 |                                                                 |
| Dorsal root  |                      | 2865.36 |                                                                 |
| Ventral root |                      | 2865.38 |                                                                 |
| Spinal nerve |                      | 2886.32 |                                                                 |
| PEAKS        | sp P19527 NFL_RAT    | 2886.32 | Neurofilament light polypeptide                                 |
| Dorsal root  |                      | 2886.34 |                                                                 |
| DRG          |                      | 2886.35 |                                                                 |
| Ventral root |                      | 2887.38 |                                                                 |
| DRG          |                      | 2964.42 |                                                                 |
| Dorsal root  |                      | 2964.44 |                                                                 |
| PEAKS        | sp P63312 TYB10_RAT  | 2964.49 | Thymosin beta-10                                                |
| Ventral root |                      | 2964.50 |                                                                 |
| PEAKS        | sp P02688 MBP_RAT    | 2986.34 | Myelin basic protein                                            |
| Ventral root |                      | 2987.48 |                                                                 |
| Ventral root |                      | 3005.48 |                                                                 |
| Dorsal root  |                      | 3014.55 |                                                                 |
| PEAKS        | tr G3V7S2 G3V7S2_RAT | 3014.63 | Neurofilament, medium. Uncharacterized protein.<br>Gene - Nefm. |

|              |                      |         |                                                                 |
|--------------|----------------------|---------|-----------------------------------------------------------------|
| ProSight     | P12839 - NFM_RAT     | 3014.63 | Neurofilament 3, medium                                         |
| Ventral root |                      | 3015.53 |                                                                 |
| Ventral root |                      | 3020.47 |                                                                 |
| PEAKS        | sp P02688 MBP_RAT    | 3020.49 | Myelin basic protein                                            |
| ProSight     | P12839 - NFM_RAT     | 3033.47 | Neurofilament 3, medium                                         |
| PEAKS        | tr G3V7S2 G3V7S2_RAT | 3033.47 | Neurofilament, medium. Uncharacterized protein.<br>Gene - Nefm. |
| Dorsal root  |                      | 3034.47 |                                                                 |
| Ventral root |                      | 3034.49 |                                                                 |
| PEAKS        | sp P19527 NFL_RAT    | 3042.43 | Neurofilament light polypeptide                                 |
| DRG          |                      | 3042.44 |                                                                 |
| Spinal nerve |                      | 3042.45 |                                                                 |
| Dorsal root  |                      | 3042.46 |                                                                 |
| Ventral root |                      | 3042.46 |                                                                 |
| Ventral root |                      | 3052.54 |                                                                 |
| PEAKS        | sp Q63544 SYUG_RAT   | 3052.61 | Gamma-synuclein                                                 |
| DRG          |                      | 3065.48 |                                                                 |
| Spinal nerve |                      | 3065.54 |                                                                 |
| Dorsal root  |                      | 3065.54 |                                                                 |
| Ventral root |                      | 3065.60 |                                                                 |
| PEAKS        | sp P02688 MBP_RAT    | 3065.62 | Myelin basic protein                                            |
| Dorsal root  |                      | 3073.57 |                                                                 |
| PEAKS        | sp P06907 MYP0_RAT   | 3073.65 | Myelin protein P0                                               |
| Ventral root |                      | 3073.68 |                                                                 |
| DRG          |                      | 3074.56 |                                                                 |
| PEAKS        | tr G3V7S2 G3V7S2_RAT | 3074.62 | Neurofilament, medium. Uncharacterized protein.<br>Gene - Nefm. |
| PEAKS        | tr G3V7S2 G3V7S2_RAT | 3078.52 | Neurofilament, medium. Uncharacterized protein.<br>Gene - Nefm. |
| Ventral root |                      | 3078.58 |                                                                 |
| DRG          |                      | 3079.47 |                                                                 |
| PEAKS        | sp P02091 HBB1_RAT   | 3088.57 | Hemoglobin subunit beta-1                                       |
| Ventral root |                      | 3089.55 |                                                                 |
| Dorsal root  |                      | 3089.56 |                                                                 |
| PEAKS        | sp P06907 MYP0_RAT   | 3089.64 | Myelin protein P0                                               |
| DRG          |                      | 3094.62 |                                                                 |
| Spinal nerve |                      | 3094.62 |                                                                 |
| Dorsal root  |                      | 3094.63 |                                                                 |
| Ventral root |                      | 3094.65 |                                                                 |
| ProSight     | P12839 - NFM_RAT     | 3094.66 | Neurofilament 3, medium                                         |
| DRG          |                      | 3108.54 |                                                                 |
| Spinal nerve |                      | 3108.55 |                                                                 |
| Dorsal root  |                      | 3108.61 |                                                                 |
| DRG          |                      | 3116.65 |                                                                 |
| Spinal nerve |                      | 3117.53 |                                                                 |

|              |                      |         |                                            |
|--------------|----------------------|---------|--------------------------------------------|
| Dorsal root  |                      | 3117.55 |                                            |
| PEAKS        | sp P69897 TBB5_RAT   | 3119.50 | Tubulin beta-5 chain                       |
| Dorsal root  |                      | 3119.53 |                                            |
| Dorsal root  |                      | 3132.51 |                                            |
| Ventral root |                      | 3132.55 |                                            |
| PEAKS        | tr Q8R4A2 Q8R4A2_RAT | 3177.55 | Caveolin 1                                 |
| Ventral root |                      | 3177.55 |                                            |
| PEAKS        | sp P19527 NFL_RAT    | 3200.49 | Neurofilament light polypeptide            |
| Dorsal root  |                      | 3200.51 |                                            |
| Spinal nerve |                      | 3200.51 |                                            |
| DRG          |                      | 3200.53 |                                            |
| Ventral root |                      | 3200.59 |                                            |
| ProSight     | P69897 TBB5_RAT      | 3200.59 | Tubulin beta-5 chain                       |
| DRG          |                      | 3200.76 |                                            |
| DRG          |                      | 3211.56 |                                            |
| Dorsal root  |                      | 3211.56 |                                            |
| Spinal nerve |                      | 3211.58 |                                            |
| Dorsal root  |                      | 3231.58 |                                            |
| Dorsal root  |                      | 3297.52 |                                            |
| PEAKS        | sp Q63544 SYUG_RAT   | 3297.53 | Gamma-synuclein                            |
| DRG          |                      | 3297.53 |                                            |
| Spinal nerve |                      | 3297.53 |                                            |
| Ventral root |                      | 3299.62 |                                            |
| Spinal nerve |                      | 3332.60 |                                            |
| Dorsal root  |                      | 3397.58 |                                            |
| PEAKS        | tr D3ZAY2 D3ZAY2_RAT | 3397.69 | Protein Epb4112                            |
| DRG          |                      | 3414.55 |                                            |
| Dorsal root  |                      | 3414.55 |                                            |
| Dorsal root  |                      | 3414.56 |                                            |
| PEAKS        | sp P19527 NFL_RAT    | 3414.58 | Neurofilament light polypeptide            |
| Spinal nerve |                      | 3414.58 |                                            |
| Ventral root |                      | 3415.63 |                                            |
| Dorsal root  |                      | 3471.81 |                                            |
| Ventral root |                      | 3499.70 |                                            |
| Ventral root |                      | 3516.77 |                                            |
| Dorsal root  |                      | 3528.70 |                                            |
| ProSight     | P02688 - MBP_RAT     | 3528.80 | Myelin basic protein S (Alt Splice Form 4) |
| PEAKS        | sp P19527 NFL_RAT    | 3569.70 | Neurofilament light polypeptide            |
| Dorsal root  |                      | 3570.68 |                                            |
| PEAKS        | sp P19527 NFL_RAT    | 3570.68 | Neurofilament light polypeptide            |
| DRG          |                      | 3570.71 |                                            |
| PEAKS        | sp P19527 NFL_RAT    | 3570.77 | Neurofilament light polypeptide            |
| Ventral root |                      | 3570.77 |                                            |



|              |                     |         |                                 |
|--------------|---------------------|---------|---------------------------------|
| Spinal nerve |                     | 3571.68 |                                 |
| Dorsal root  |                     | 3572.66 |                                 |
| Dorsal root  |                     | 3668.72 |                                 |
| Spinal nerve |                     | 3668.75 |                                 |
| Dorsal root  |                     | 3703.83 |                                 |
| ProSight     | P12839 - NFM_RAT    | 3704.84 | Neurofilament 3, medium         |
| Dorsal root  |                     | 3704.87 |                                 |
| Dorsal root  |                     | 3728.72 |                                 |
| DRG          |                     | 3728.76 |                                 |
| Spinal nerve |                     | 3729.76 |                                 |
| Ventral root |                     | 3836.73 |                                 |
| ProSight     | P60711 - ACTB_RAT   | 3836.97 | Actin, cytoplasmic 2            |
| Dorsal root  |                     | 3857.81 |                                 |
| Dorsal root  |                     | 4112.90 |                                 |
| DRG          |                     | 4113.04 |                                 |
| Spinal nerve |                     | 4114.01 |                                 |
| Dorsal root  |                     | 4211.95 |                                 |
| Spinal nerve |                     | 4225.05 |                                 |
| Dorsal root  |                     | 4225.09 |                                 |
| ProSight     | P31000  VIME_RAT    | 4225.18 | Vimentin                        |
| Ventral root |                     | 4225.19 |                                 |
| DRG          |                     | 4226.16 |                                 |
| DRG          |                     | 4227.09 |                                 |
| Spinal nerve |                     | 4227.13 |                                 |
| Dorsal root  |                     | 4281.12 |                                 |
| Spinal nerve |                     | 4282.23 |                                 |
| DRG          |                     | 4282.48 |                                 |
| ProSight     | P12839 - NFM_RAT    | 4342.08 | Neurofilament 3, medium         |
| Dorsal root  |                     | 4342.11 |                                 |
| ProSight     | P19527 - NFL_RAT    | 4397.03 | Neurofilament light polypeptide |
| Dorsal root  |                     | 4398.03 |                                 |
| Spinal nerve |                     | 4467.19 |                                 |
| Spinal nerve |                     | 4469.12 |                                 |
| Dorsal root  |                     | 4557.95 |                                 |
| Dorsal root  |                     | 4669.36 |                                 |
| DRG          |                     | 4669.38 |                                 |
| Spinal nerve |                     | 4669.39 |                                 |
| ProSight     | P12839 - NFM_RAT    | 4669.40 | Neurofilament 3, medium         |
| Ventral root |                     | 4669.42 |                                 |
| DRG          |                     | 4672.38 |                                 |
| Spinal nerve |                     | 4818.67 |                                 |
| PEAKS        | sp P63312 TYB10_RAT | 4934.52 | Thymosin beta-10                |
| Dorsal root  |                     | 4935.40 |                                 |

|              |                     |         |                  |
|--------------|---------------------|---------|------------------|
| Spinal nerve |                     | 4935.49 |                  |
| DRG          |                     | 4935.50 |                  |
| Ventral root |                     | 4936.69 |                  |
| ProSight     | sp P62329 TYB4_RAT  | 4961.49 | Thymosin beta-4  |
| Ventral root |                     | 4961.49 |                  |
| Dorsal root  |                     | 4961.49 |                  |
| Spinal nerve |                     | 4961.49 |                  |
| DRG          |                     | 4961.49 |                  |
| PEAKS        | sp P63312 TYB10_RAT | 4975.55 | Thymosin beta-10 |
| DRG          |                     | 4976.43 |                  |
| Dorsal root  |                     | 4977.43 |                  |
| PEAKS        | sp P62329 TYB4_RAT  | 4977.48 | Thymosin beta-4  |
| DRG          |                     | 4978.54 |                  |
| Spinal nerve |                     | 4979.44 |                  |
| Dorsal root  |                     | 4979.48 |                  |

**Table S5.** Peak statistics data from ClinProTools including the averages, standard deviations, and covariance for selected peaks from the DRG cell cultures measured using MALDI-TOF MS.

| m/z (MALDI) | Identification                                                                      | P Value of Kruskal-Wallis Test | Ave1 (Control) | Ave2 (Pre-Stim) | Ave3 (Stim) | Ave4 (Post-stim) | Ave5 (Blank) | StdDev (Control) | StdDev (Pre-Stim) | StdDev (Stim) | StdDev (Post-stim) | StdDev (Blank) |
|-------------|-------------------------------------------------------------------------------------|--------------------------------|----------------|-----------------|-------------|------------------|--------------|------------------|-------------------|---------------|--------------------|----------------|
| 601.17      | Unassigned Peak                                                                     | 0.000432                       | 1.44           | 2.46            | 4.02        | 4.04             | 2.28         | 0.83             | 1.43              | 2.38          | 2.85               | 0.97           |
| 616.27      | Unassigned Peak                                                                     | 0.0348                         | 1.27           | 2.39            | 2.16        | 2.09             | 2.48         | 1.08             | 2.22              | 1.27          | 0.98               | 1.51           |
| 650.86      | Unassigned Peak                                                                     | 0.234                          | 2.05           | 3.76            | 3.73        | 3.53             | 2.21         | 1.16             | 2.78              | 2.75          | 2.23               | 0.72           |
| 739.43      | Unassigned Peak                                                                     | 0.00000148                     | 1.28           | 2.1             | 3.02        | 3.01             | 2.18         | 0.78             | 0.82              | 1.18          | 0.93               | 0.77           |
| 768.71      | Hemoglobin subunit beta-1                                                           | 0.00103                        | 4.1            | 2.68            | 2.13        | 1.78             | 1.84         | 2.29             | 1.32              | 0.87          | 0.68               | 0.76           |
| 770.68      | Unassigned Peak                                                                     | 0.0856                         | 4.14           | 5.4             | 4.02        | 3.61             | 2.61         | 2.88             | 10.95             | 4.58          | 4.35               | 1.29           |
| 916.69      | Myelin protein P0                                                                   | < 0.000001                     | 1.04           | 4.23            | 7.39        | 7.54             | 2.8          | 0.48             | 2.14              | 3.98          | 3.65               | 2.94           |
| 1180.79     | Histone H2B                                                                         | 0.00337                        | 1.5            | 2.15            | 1.7         | 3.08             | 2.1          | 0.53             | 0.67              | 1.02          | 1.69               | 0.95           |
| 1204.85     | Peptidyl-prolyl cis-trans isomerase FKBP1A                                          | 0.0000023                      | 2.6            | 2.51            | 1.86        | 1.82             | 1.26         | 1.36             | 1.75              | 1.05          | 0.66               | 0.24           |
| 1213.86     | Histone H2B/Gamma-synuclein                                                         | 0.0000151                      | 3.92           | 3.52            | 2.32        | 2.52             | 5.63         | 0.87             | 0.98              | 0.61          | 0.97               | 6.26           |
| 1253.72     | Mast cell protease 1                                                                | < 0.000001                     | 2.26           | 8.13            | 11.01       | 13.25            | 3.94         | 0.75             | 5.58              | 6.01          | 9.11               | 1.77           |
| 1268.75     | Unassigned Peak                                                                     | < 0.000001                     | 1.62           | 3.73            | 4.66        | 5.37             | 2.35         | 0.57             | 1.98              | 1.92          | 2.69               | 0.84           |
| 1332.81     | Neurofilament light polypeptide/N eurofilament medium polypeptide/Myelin protein P0 | 0.0000059                      | 8.5            | 7.16            | 5.47        | 4.54             | 2.15         | 7.48             | 7.38              | 3.38          | 1.55               | 0.71           |
| 1354.68     | Vimentin                                                                            | 0.0000226                      | 2.65           | 2               | 1.53        | 1.33             | 1.26         | 1.59             | 1.07              | 0.57          | 0.23               | 0.16           |
| 1573.59     | Lumican/Ubiquitin carboxyl-terminal hydrolase isozyme L1                            | < 0.000001                     | 2.98           | 2.23            | 1.38        | 1.37             | 0.85         | 1.42             | 1.04              | 0.51          | 0.42               | 0.22           |
| 1575.87     | Mast cell protease 1/Vimentin/Serum albumin                                         | < 0.000001                     | 2.8            | 1.9             | 1.24        | 1.19             | 0.82         | 1.65             | 0.48              | 0.43          | 0.31               | 0.15           |
| 1820.61     | Actin cytoplasmic 2/Hemoglobin subunit beta-1                                       | < 0.000001                     | 6.88           | 3.74            | 1.75        | 1.16             | 0.83         | 9.67             | 4.64              | 1.79          | 0.75               | 0.14           |
| 1857.81     | Unassigned Peak                                                                     | < 0.000001                     | 3.65           | 1.9             | 1.02        | 0.87             | 0.65         | 3.13             | 1.53              | 0.38          | 0.19               | 0.15           |
| 1872.86     | Unassigned Peak                                                                     | < 0.000001                     | 3.59           | 2.33            | 1.33        | 0.91             | 0.61         | 2.93             | 2.32              | 1.11          | 0.33               | 0.16           |

|         |                                                            |            |      |       |       |       |       |       |       |      |       |       |
|---------|------------------------------------------------------------|------------|------|-------|-------|-------|-------|-------|-------|------|-------|-------|
| 1898.02 | Histone H2B/Cytochrome c oxidase subunit 6A1 mitochondrial | < 0.000001 | 4.74 | 2.54  | 1.26  | 1.22  | 0.69  | 3.26  | 1.02  | 0.58 | 0.53  | 0.15  |
| 1969.98 | Nucleoside diphosphate kinase alpha isoform                | < 0.000001 | 4.83 | 3.03  | 1.4   | 1.08  | 0.6   | 2.97  | 2.32  | 1.14 | 0.46  | 0.2   |
| 2010.07 | High mobility group protein B1/Protein Hmg111              | < 0.000001 | 4.87 | 3.28  | 1.48  | 1.06  | 0.68  | 5.95  | 5.13  | 1.13 | 0.29  | 0.33  |
| 2060.9  | Histone H2B                                                | < 0.000001 | 3.3  | 2.06  | 1.15  | 0.81  | 1.02  | 2.86  | 2.35  | 1.32 | 0.4   | 0.53  |
| 2099.2  | Histone H2B                                                | < 0.000001 | 5.89 | 3.35  | 1.53  | 1.06  | 0.55  | 4.83  | 2.77  | 1.69 | 0.67  | 0.19  |
| 2211.15 | Unassigned Peak                                            | < 0.000001 | 5.02 | 2.22  | 0.98  | 0.85  | 0.51  | 6.96  | 0.89  | 0.43 | 0.28  | 0.14  |
| 2246.86 | Unassigned Peak                                            | < 0.000001 | 6.16 | 3.39  | 1.57  | 0.9   | 0.51  | 6.48  | 4.43  | 2.34 | 0.61  | 0.15  |
| 2272.3  | Periaxin                                                   | < 0.000001 | 7.91 | 4.32  | 2.07  | 1.5   | 0.49  | 10.69 | 3.67  | 2.75 | 1.26  | 0.14  |
| 2359.82 | Unassigned Peak                                            | < 0.000001 | 4.83 | 2.57  | 1.58  | 1.1   | 0.87  | 3.68  | 1.72  | 1.37 | 0.41  | 0.27  |
| 2440.19 | Unassigned Peak                                            | < 0.000001 | 3.05 | 1.83  | 0.96  | 0.79  | 0.56  | 1.46  | 0.84  | 0.43 | 0.28  | 0.13  |
| 2482.21 | Unassigned Peak                                            | < 0.000001 | 2.84 | 1.84  | 1.21  | 1.16  | 1.33  | 1.24  | 0.59  | 0.48 | 0.39  | 0.68  |
| 2498.08 | Unassigned Peak                                            | < 0.000001 | 3.4  | 2.05  | 1.16  | 0.92  | 0.61  | 2.88  | 0.86  | 0.65 | 0.35  | 0.11  |
| 2559.41 | Unassigned Peak                                            | < 0.000001 | 8.97 | 5.29  | 2.13  | 1.12  | 0.6   | 5.99  | 5.46  | 3.32 | 0.77  | 0.09  |
| 2595.24 | Unassigned Peak                                            | < 0.000001 | 2.43 | 1.92  | 1.04  | 0.95  | 0.73  | 1.13  | 1.01  | 0.38 | 0.38  | 0.23  |
| 2616.13 | Neurofilament heavy polypeptide                            | < 0.000001 | 2.87 | 1.82  | 0.93  | 0.75  | 0.5   | 0.93  | 0.82  | 0.38 | 0.29  | 0.13  |
| 2629.5  | Unassigned Peak                                            | < 0.000001 | 4.69 | 3.72  | 1.71  | 1.3   | 0.48  | 2.46  | 2.31  | 1.65 | 0.8   | 0.14  |
| 2722.51 | Unassigned Peak                                            | < 0.000001 | 3.73 | 1.97  | 1.02  | 0.73  | 0.48  | 2.6   | 0.9   | 0.64 | 0.25  | 0.12  |
| 2748.43 | Heat shock 27kDa protein 1                                 | < 0.000001 | 3.47 | 2.35  | 1.04  | 0.9   | 0.47  | 1.85  | 1.42  | 0.45 | 0.45  | 0.13  |
| 2807.86 | Unassigned Peak                                            | < 0.000001 | 4.83 | 12.02 | 7.42  | 8.13  | 0.6   | 6.34  | 22.65 | 8.72 | 11.32 | 0.26  |
| 3502.77 | Unassigned Peak                                            | 0.00188    | 1.03 | 1.11  | 1.83  | 2.15  | 0.68  | 0.6   | 0.47  | 2.14 | 3.54  | 0.46  |
| 3516.78 | Unassigned Peak                                            | < 0.000001 | 2.01 | 20.86 | 36.97 | 47.14 | 10.46 | 2.45  | 27.54 | 36.5 | 40.94 | 16.13 |
| 3807.51 | Unassigned Peak                                            | < 0.000001 | 3.93 | 1.94  | 0.75  | 0.61  | 0.35  | 3.1   | 1.52  | 0.46 | 0.36  | 0.09  |

**Table S6.** Fold changes between sample classes for DRG cell culture MALDI-TOF MS.

| Theoretical Mass | m/z (MALDI) | Protein ID           | Peptide Sequence              | Identification                                   | Stim/Pre | Post/Pre | Pre/Control |
|------------------|-------------|----------------------|-------------------------------|--------------------------------------------------|----------|----------|-------------|
| 600.17           | 601.17      | Unassigned           |                               |                                                  | 0.47     | 0.31     | 0.54        |
| 615.27           | 616.27      | Unassigned           |                               |                                                  | 0.47     | 0.31     | 0.54        |
| 649.86           | 650.86      | Unassigned           |                               |                                                  | 0.50     | 0.48     | 0.54        |
| 738.43           | 739.43      | Unassigned           |                               |                                                  | 0.66     | 0.72     | 0.90        |
| 767.71           | 768.71      | sp P02091 HBB1_RAT   | A.LAHKYH                      | Hemoglobin subunit beta-1                        | 0.44     | 0.38     | 0.68        |
| 769.68           | 770.68      | Unassigned           |                               |                                                  | 0.79     | 0.66     | 0.65        |
| 915.69           | 916.69      | sp P06907 MYPO_RAT   | Y.AMLDHSRS.T                  | Myelin protein P0                                | 0.45     | 0.32     | 0.67        |
| 1179.79          | 1180.79     | tr G3V8B3 G3V8B3_RAT | E.RIAGEASRLAH.Y               | Histone H2B                                      | 0.46     | 0.32     | 0.57        |
| 1203.85          | 1204.85     | sp Q62658 FKB1A_RAT  | L.VFDVELLKLE                  | Peptidyl-prolyl cis-trans isomerase FKBP1A       | 0.50     | 0.48     | 0.54        |
| 1212.86          | 1213.86     | tr F1LQ96 F1LQ96_RAT | M(+42.01)DVFKKGFSLA           | Gamma-synuclein                                  | 0.56     | 0.39     | 0.62        |
| 1212.86          | 1213.86     | tr G3V8B3 G3V8B3_RAT | G.TKAVTKYTSSK                 | Histone H2B                                      | 0.66     | 0.72     | 0.90        |
| 1252.72          | 1253.72     | sp P09650 MCPT1_RAT  | Y.NFYSNLHDIM.L                | Mast cell protease 1                             | 0.56     | 0.39     | 0.62        |
| 1267.75          | 1268.75     | Unassigned           |                               |                                                  | 0.50     | 0.48     | 0.54        |
| 1331.81          | 1332.81     | sp P06907 MYPO_RAT   | K.SKGLGESRKDKK                | Myelin protein P0                                | 0.56     | 0.39     | 0.62        |
| 1331.81          | 1332.81     | sp P19527 NFL_RAT    | Y.SAPVSSLSVRRS.Y              | Neurofilament light polypeptide                  | 0.79     | 1.43     | 1.43        |
| 1331.81          | 1332.81     | tr G3V7S2 G3V7S2_RAT | E.IIETKVEDEK.S                | Neurofilament medium polypeptide                 | 0.62     | 0.61     | 0.75        |
| 1353.68          | 1354.68     | sp P31000 VIME_RAT   | L.NDRFANYIDKV.R               | Vimentin                                         | 1.35     | 1.63     | 3.60        |
| 1572.59          | 1573.59     | sp P51886 LUM_RAT    | M.SKLPAGLPTSLLTLY.L           | Lumican                                          | 0.65     | 0.63     | 0.68        |
| 1572.59          | 1573.59     | sp Q00981 UHL1_RAT   | MQLKPMEINPEML.N               | Ubiquitin carboxyl-terminal hydrolase isozyme L1 | 1.75     | 1.78     | 4.07        |
| 1574.87          | 1575.87     | sp P09650 MCPT1_RAT  | R.AAGWGQTGVTKPTSNT.L          | Mast cell protease 1                             | 0.76     | 0.63     | 0.84        |
| 1574.87          | 1575.87     | sp P31000 VIME_RAT   | T.VETRDGQVINETSQ.H            | Vimentin                                         | 0.51     | 0.41     | 0.63        |
| 1819.61          | 1820.61     | sp P02091 HBB1_RAT   | L.LVVYPWTQRYFDSFG             | Hemoglobin subunit beta-1                        | 0.76     | 0.63     | 0.84        |
| 1819.61          | 1820.61     | sp P63259 ACTG_RAT   | M.E(+42.01)EEIAALVIDNGSGMCK.A | Actin cytoplasmic 2                              | 0.76     | 0.63     | 0.84        |
| 1856.81          | 1857.81     | Unassigned           |                               |                                                  | 0.46     | 0.36     | 0.63        |
| 1871.86          | 1872.86     | Unassigned           |                               |                                                  | 0.74     | 0.73     | 0.97        |
| 1897.02          | 1898.02     | sp P10818 CX6A1_RAT  | L.FHNPHMNPLPTGYEDE            | Cytochrome c oxidase subunit 6A1 mitochondrial   | 0.48     | 0.35     | 0.55        |
| 1897.02          | 1898.02     | tr D3ZWM5 D3ZWM5_RAT |                               | Histone H2B                                      | 0.45     | 0.32     | 0.67        |
| 1897.02          | 1898.02     | tr G3V8B3 G3V8B3_RAT | F.VNDIFERIAEASRLAH.Y          | Histone H2B                                      | 0.62     | 0.61     | 0.75        |
| 1968.98          | 1969.98     | tr Q9QWQ4 Q9QWQ4_RAT | M.A(+42.01)NLERTFIAIKPDGVQR.G | Nucleoside diphosphate kinase alpha isoform      | 0.77     | 0.67     | 0.75        |

|         |         |                              |                                              |                                    |      |      |       |
|---------|---------|------------------------------|----------------------------------------------|------------------------------------|------|------|-------|
| 2009.07 | 2010.07 | sp P63159 H<br>MGB1_RAT      | M.SAKEKGGKFEDMAKA<br>DKAR.Y                  | High mobility group protein<br>B1  | 0.65 | 0.63 | 0.68  |
| 2009.07 | 2010.07 | tr D3ZCR3 D<br>3ZCR3_RAT     |                                              | Protein Hmg111                     | 1.63 | 1.64 | 1.71  |
| 2059.9  | 2060.9  | tr D4A817 D<br>4A817_RAT     |                                              | Histone H2B                        | 0.90 | 0.87 | 1.88  |
| 2059.9  | 2060.9  | tr G3V8B3 G<br>3V8B3_RAT     | F.VNDIFERIAGEASRLA<br>HY.N                   | Histone H2B                        | 0.99 | 0.94 | 1.83  |
| 2059.9  | 2060.9  | tr D3ZWM5 <br>D3ZWM5_R<br>AT |                                              | Histone H2B                        | 1.44 | 1.43 | 1.64  |
| 2098.2  | 2099.2  | tr D3ZWM5 <br>D3ZWM5_R<br>AT | L.LPGELAKHAVSEGTK<br>AVTKY.T                 | Histone H2B                        | 0.74 | 0.67 | 1.30  |
| 2210.15 | 2211.15 | Unassigned                   |                                              |                                    | 1.25 | 1.44 | 2.30  |
| 2245.86 | 2246.86 | Unassigned                   |                                              |                                    | 0.54 | 0.46 | 0.52  |
| 2271.3  | 2272.3  | sp Q63425 P<br>RAX_RAT       | V.KLPKIPDMAVPDVRL<br>PELQL.P                 | Periaxin                           | 0.57 | 0.39 | 0.65  |
| 2358.82 | 2359.82 | Unassigned                   |                                              |                                    | 0.44 | 0.38 | 0.44  |
| 2439.19 | 2440.19 | Unassigned                   |                                              |                                    | 0.46 | 0.27 | 0.55  |
| 2481.21 | 2482.21 | Unassigned                   |                                              |                                    | 0.61 | 0.43 | 0.53  |
| 2497.08 | 2498.08 | Unassigned                   |                                              |                                    | 0.52 | 0.43 | 0.60  |
| 2558.41 | 2559.41 | Unassigned                   |                                              |                                    | 0.66 | 0.63 | 0.65  |
| 2594.24 | 2595.24 | Unassigned                   |                                              |                                    | 0.57 | 0.45 | 0.60  |
| 2615.13 | 2616.13 | tr F1LRZ7 F<br>1LRZ7_RAT     | M(+42.01)MSFGGADAL<br>LGAPFAPLHGGGSLHY.<br>A | Neurofilament heavy<br>polypeptide | 0.40 | 0.21 | 0.59  |
| 2628.5  | 2629.5  | Unassigned                   |                                              |                                    | 0.54 | 0.49 | 0.79  |
| 2721.51 | 2722.51 | Unassigned                   |                                              |                                    | 0.46 | 0.35 | 0.79  |
| 2747.43 | 2748.43 | tr G3V913 G<br>3V913_RAT     | L.RSPSWEPFRDWYPAH<br>SRLFDQA.F               | Heat shock 27kDa protein 1         | 0.52 | 0.37 | 0.53  |
| 2806.86 | 2807.86 | Unassigned                   |                                              |                                    | 0.62 | 0.68 | 2.49  |
| 3501.77 | 3502.77 | Unassigned                   |                                              |                                    | 1.65 | 1.94 | 1.08  |
| 3515.78 | 3516.78 | Unassigned                   |                                              |                                    | 1.77 | 2.26 | 10.38 |
| 3806.51 | 3807.51 | Unassigned                   |                                              |                                    | 0.39 | 0.31 | 0.49  |

## References

1. Chang, I. A., Oh, M.-J., Kim, M. H., Park, S.-K., Kim, B. G., Namgung, U.: Vimentin phosphorylation by Cdc2 in Schwann cell controls axon growth via  $\beta$ 1-integrin activation. *The FASEB Journal* **26**, 2401-2413 (2012)
2. Yabe, J. T., Chan, W. K. H., Wang, F.-S., Pimenta, A., Ortiz, D. D., Shea, T. B.: Regulation of the transition from vimentin to neurofilaments during neuronal differentiation. *Cell Motility and the Cytoskeleton* **56**, 193-205 (2003)
3. Berg, A., Zelano, J., Pekna, M., Wilhelmsson, U., Pekny, M., Cullheim, S.: Axonal regeneration after sciatic nerve lesion is delayed but complete in GFAP- and vimentin-deficient mice. *PLoS ONE* **8**, e79395 (2013)
